# Supplementary material
Source: Research Square preprint supplement (doi:10.21203/rs.3.rs-7823722/v1)

**Supplementary Figure 1 :** Boxplot of two α-diversity indexes, Chao1 and Shannon, according to the specimen stages (**A,B**), the species (**C,D**) and the site (**E,F**) for the first metabarcoding analysis (*R. chacei* and *R. exoculata* juvenile specimens and *R. exoculata* adult from BICOSE2 cruise).


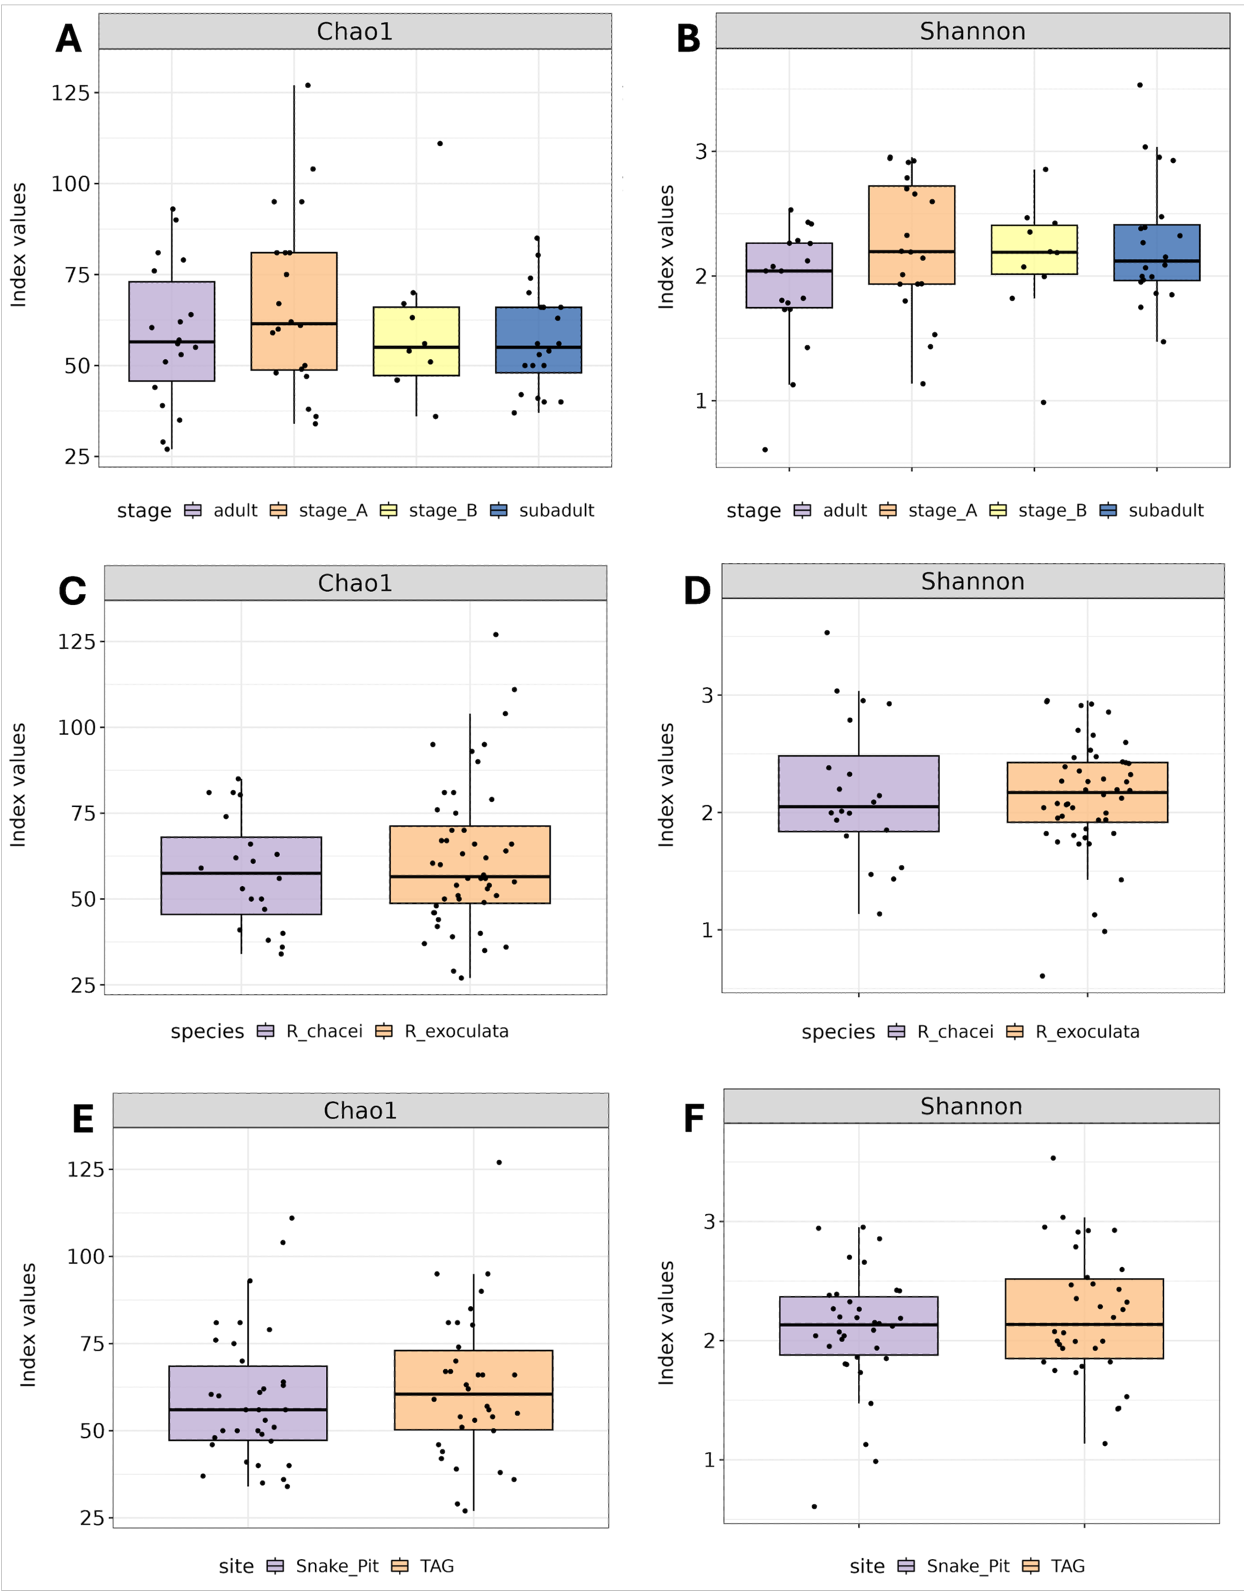


**Supplementary Figure 2** : PCoA ordination plot of the bacterial diversity for the first metabarcoding analysis *R. chacei* and *R. exoculata* juvenile specimens and *R. exoculata* adult from BICOSE2 cruise). (**A,C,E**) PCoA ordination plot of the bacterial diversity based on Unifrac distance at the ASV level and colored according to the site (**A**), species (**C**) and life stage (**E**). (**B,D,F**) PCoA ordination plot of the bacterial diversity based on Weighted Unifrac distance at the ASV level and colored according to the site (**B**), species (**D**) and life stage (**F**). Ellipses represent 95% confidence interval for each group.


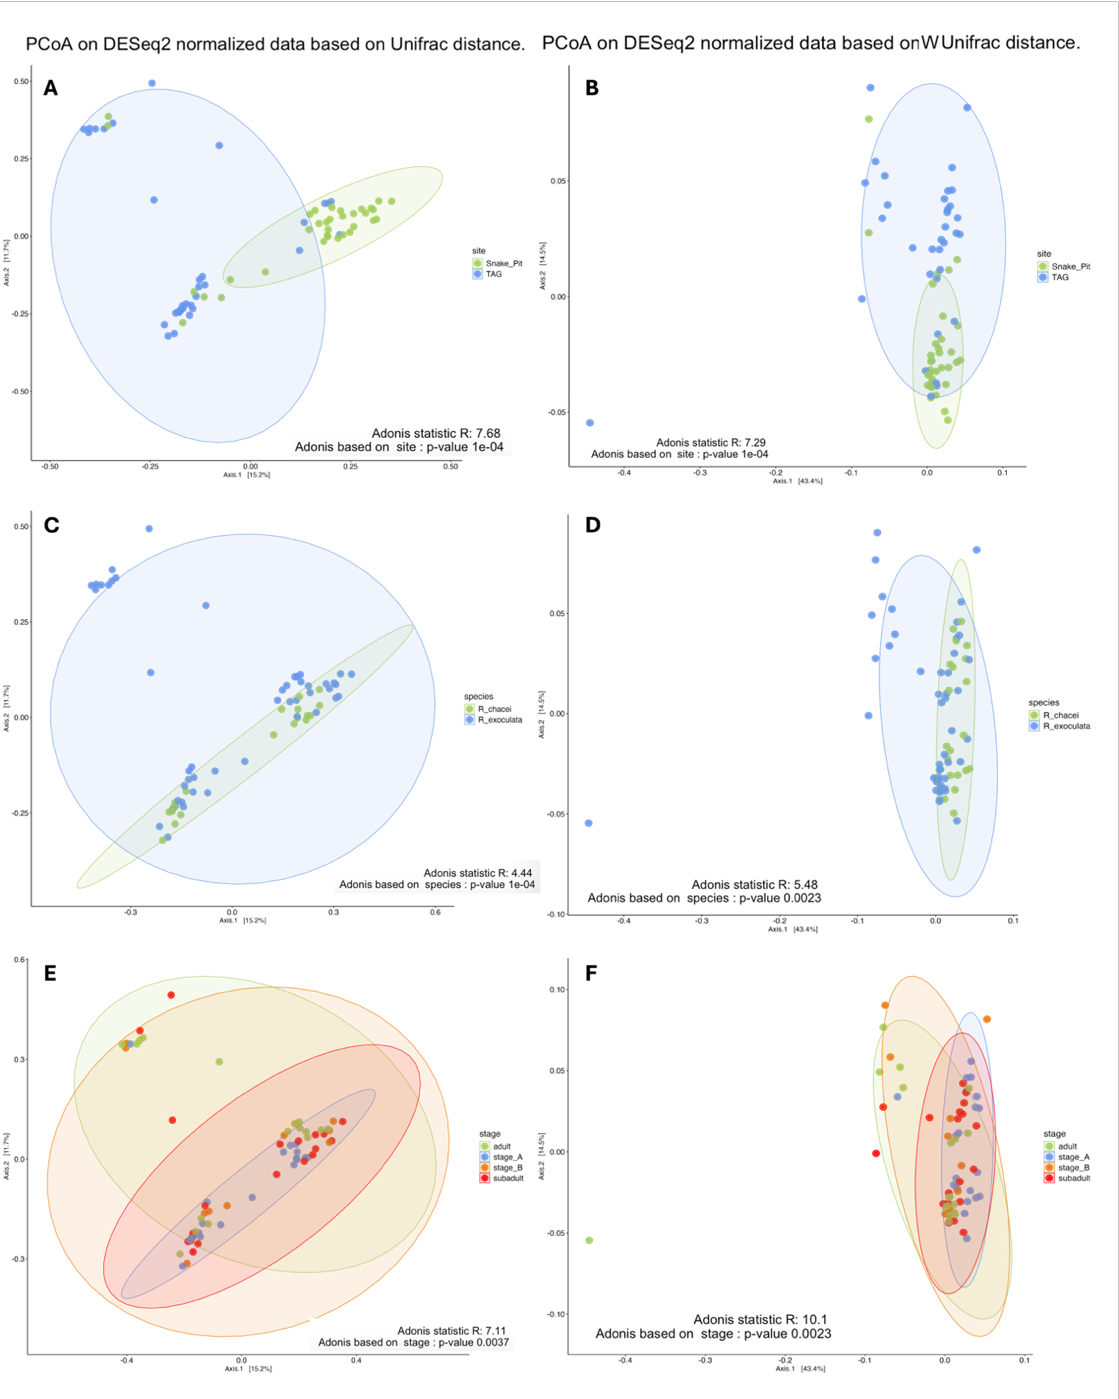


**Supplementary Figure 3 :** Boxplot of two α-diversity indexes, Chao1 and Shannon, according to the specimen stages (**A,B**) and the species (**C,D**) for the second metabarcoding analysis (*R. chacei* and *R. exoculata* adult specimens from BICOSE2014 cruise).


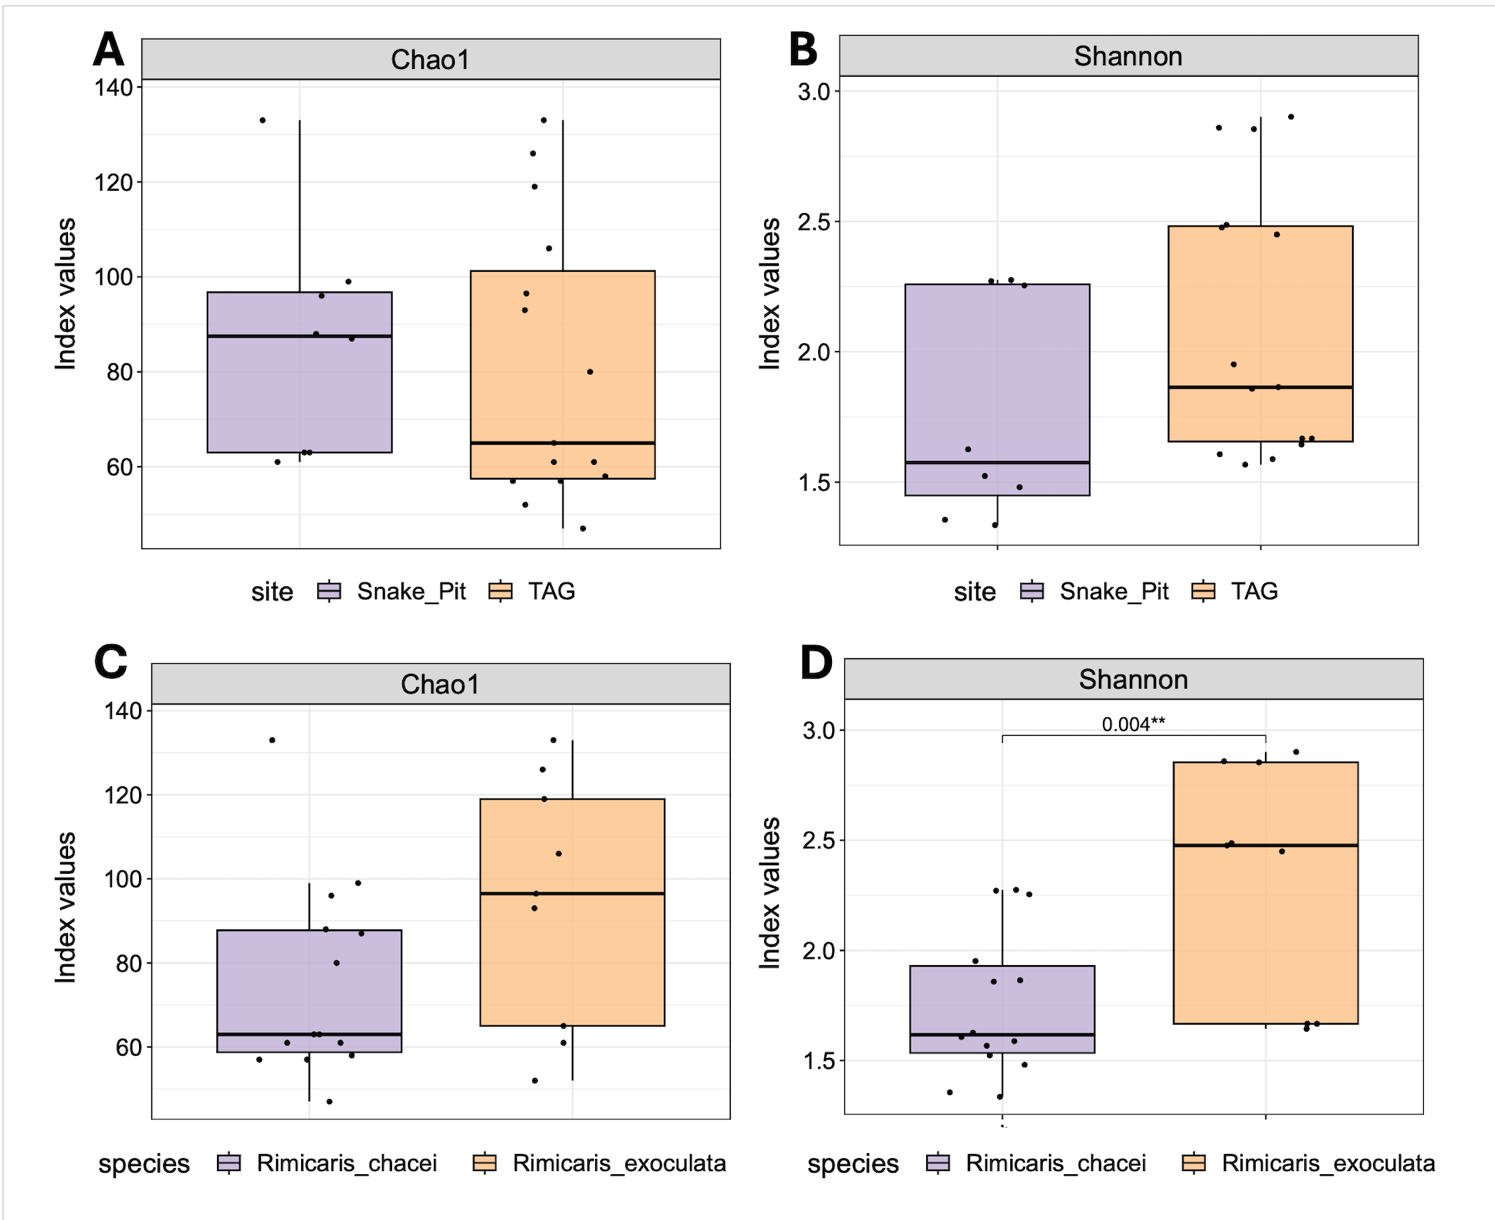


**Supplementary Figure 4** : PCoA ordination plot of the bacterial diversity for the second metabarcoding analysis (*R. chacei* and *R. exoculata* adult specimens from BICOSE2014 cruise). (**A,C**) PCoA ordination plot of the bacterial diversity based on Unifrac distance at the ASV level and colored according to the site (**A**) and species (**C**). (**B,D**) PCoA ordination plot of the bacterial diversity based on Weighted Unifrac distance at the ASV level and colored according to the site (**B**) and species **(D)**. Ellipses represent 95% confidence interval for each group.


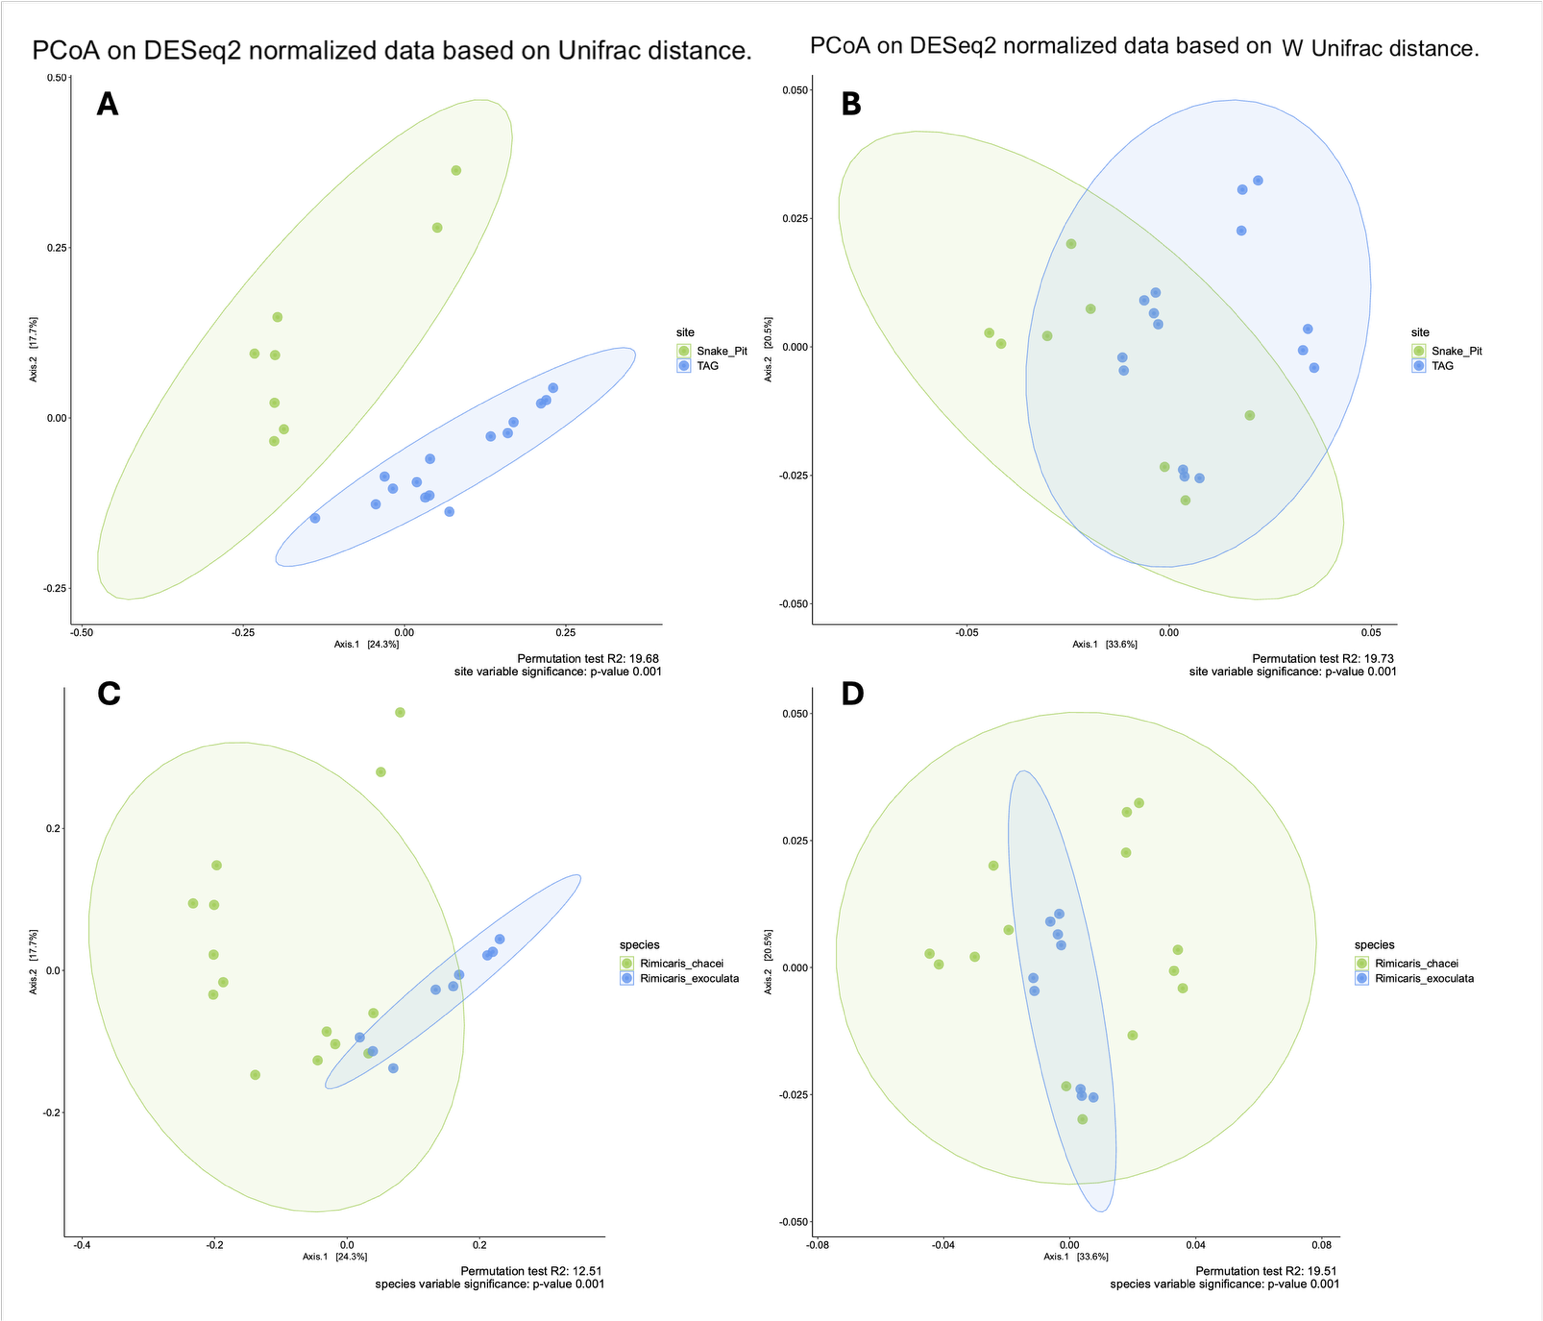


**Supplementary Figure 5** :Bacterial composition at the order-level in the midgut tube samples of shrimp at different species and sites for the second metabarcoding analysis (*R. chacei* and *R. exoculata* adult specimens from BICOSE2014 cruise).


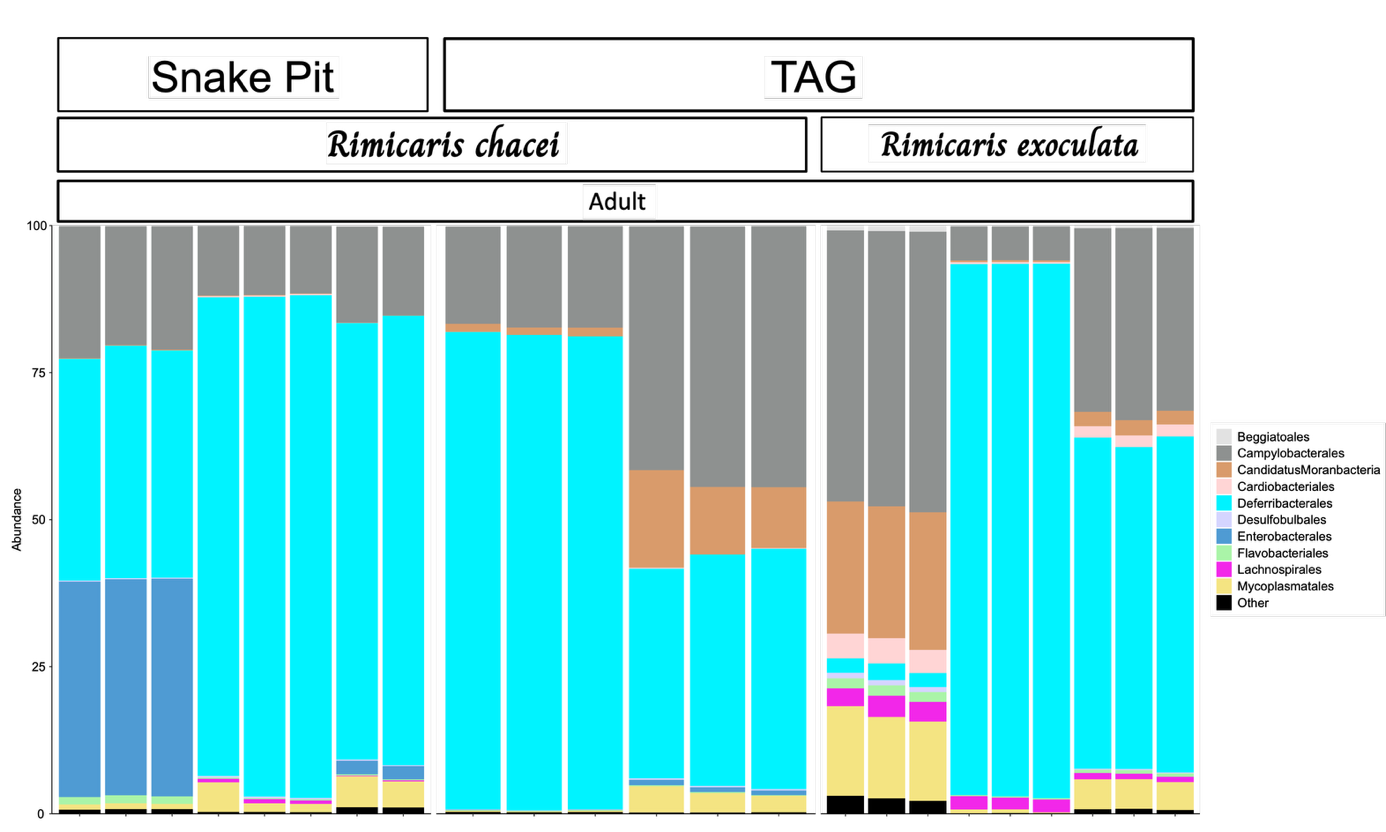


**Supplementary Figure 6** : **Probe specificity and optimal hybridization**. **A** and **B** represent the branchiostegite of a *R. exoculata* subadult specimen. (**A**) *Campylobacteria* were hybridized with the specific probe Epsy549-Cy5 (green), *Gammaproteobacteria* were hybridized with the specific probe GAM42a-Cy5 (red) and *Lachnospirales* were hybridized with the specific probe Clostri-Lachno109-Cy3 (yellow, no hybridization). (**B**) is the same photography as the **A**, with only the canal Cy3. There is not hybridization with the probe Clostri109 on bacteria. **C** and **D** represent sections of an adult *R. exoculata* specimen midgut tube. (**C**) *Candidatus* Microvillispirillaceae were hybridized with the specific probe Def1229-Cy5 (red) and *Lachnospirales* were hybridized with the specific probe Clostri-Lachno109-Cy3 (yellow). (**D**) Bacteria were hybridized with the universal probe Eub388-Cy5 (red) and *Lachnospirales* were co-hybridized with the specific probe Clostri-Lachno109-Cy3 and Eub338-Cy5(orange). All the photography were taken with the Apotome ® (and DIC only for **D**) and epithelium nuclei cells were labelled with DAPI. Scale bars = 20 μm).


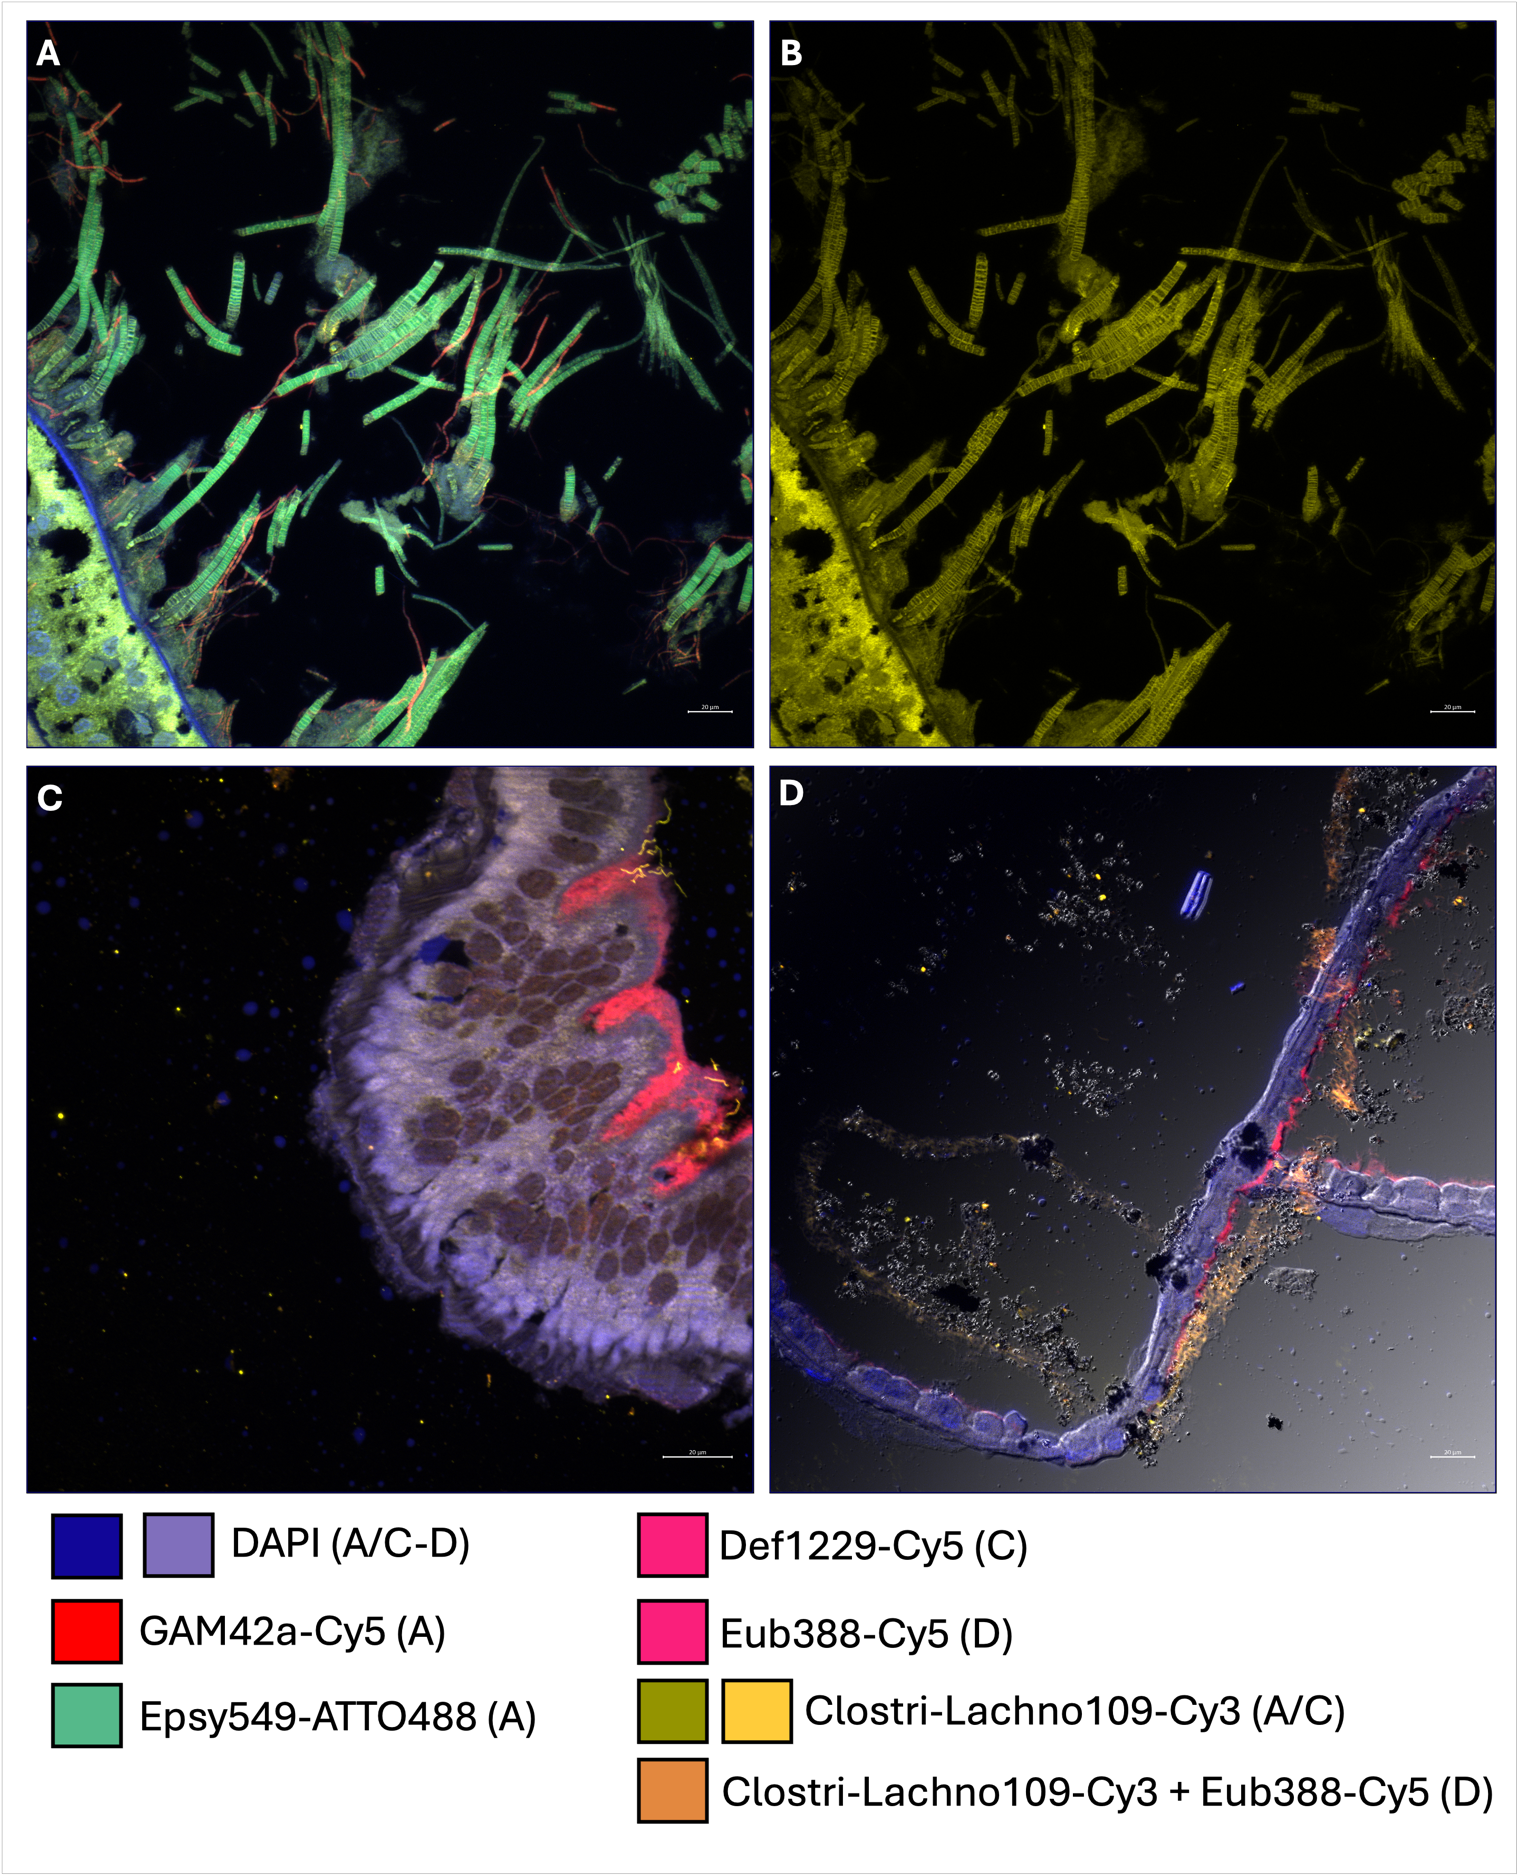

Supplement: Supplementary file 1 [file 051d4607d1b429831cf96228.docx]
