# Supplementary material
Source: Research Square preprint supplement (doi:10.21203/rs.3.rs-7823722/v1)
Supplement: Supplementary file 2 [file 3ca4290721cedf15e0949827.docx]

## Supplementary Table 1

Metabarcoding Metadata.

## Supplementary Table 2

Decontaminated ASVs table for the main metabarcoding analysis (*R. chacei* and *R. exoculata* juvenile specimens and *R. exoculata* adult specimens).

## Supplementary Table 3

 β diversity (Unifrac and Weighted Unifrac) from the main metabarcoding analysis (*R. chacei* and *R. exoculata* juvenile specimens and *R. exoculata* adult specimens).

## Supplementary Table 4

ASVs table, β diversity (Unifrac and Weighted Unifrac), ANCOM-BC2 on ASVs according to the species and proportion (average ± standard deviation) of the ASVs obtained and affiliated to *Lachnospirales* of the total of bacterial communities in the midgut tube samples of *R. chacei* and *R. exoculata* adult samples from BICOSE2014 cruise (second metabarcoding analysis).

## Supplementary Table 5

ANCOM-BC2 on ASVs according to the stage and species for the main metabarcoding analysis (*R. chacei* and *R. exoculata* juvenile specimens and *R. exoculata* adult specimens).

## Supplementary Table 6

List of the genes featured in Figure 4.

## Supplementary Table 7

List of KEGG module showing the completeness of the metabolic pathways of the MAG from Snake Pit.

## Supplementary Table 8

List of KEGG module showing the completeness of the metabolic pathways of the MAG from TAG.

## Supplementary Table 9

List of the annotation MAG using Prokka for the MAG from Snake Pit.

## Supplementary Table 10

List of the annotation MAG using Prokka for the MAG from TAG.

## Supplementary Table 11

List of the annotation MAG using EGGNog for the MAG from Snake Pit.

## Supplementary Table 12

List of the annotation MAG using EGGNog for the MAG from TAG.

## Supplementary Table 13

CRISPRs with evidence level 4 and their *cas* genes found in the MAG contigs.

## Supplementary Table 14

List and number of CAZYmes families observed for the different MAG families.
