# Supplementary material
Source: Research Square preprint supplement (doi:10.21203/rs.3.rs-7823722/v1)
Supplement: Supplementary file 3 [file b38c998480c431b119461da0.xlsx]

## Sheet: Supplementary table 1
ID	Species	Stage	Site	Cruise	Full_ID	GeneBank_ID_COI	Specimens with the same GeneBank_ID_COI means their COI sequence was identical at 100%.
Cr108	R. chacei	A	TAG	Hermine	Her_PL10_ASPI1_Cr108	PP916039
bebe12A	R. chacei	A	TAG	BICOSE2	Bic2_PL09_Aspi2_Bebe12A	PP916036
Cr107	R. chacei	A	TAG	Hermine	Her_PL10_Aspi1_Cr107	PP916036
R08	R. chacei	A	TAG	BICOSE2	Bic2_PL910_04_Peris_R08	PP916036
R32	R. chacei	A	TAG	BICOSE2	Bic2_PL910_04_Peris_R32	PP916036
bebe13A	R. chacei	A	Snake Pit	BICOSE2	Bic2_PL14_Aspi1_Bebe13A	PP916036
bebe15A	R. chacei	A	Snake Pit	BICOSE2	Bic2_PL14_Aspi1_Bebe15A	PP916036
bebe24A	R. chacei	A	Snake Pit	BICOSE2	Bic2_PL17_Aspi1_Bebe24A	PP916036
CR011	R. chacei	A	Snake Pit	Hermine	Her_PL02_Aspi3_Cr011	PP916036
Cr051	R. chacei	A	Snake Pit	Hermine	Her_PL02_Aspi2_Cr051	PP916035
bebe1B	R. chacei	Subadult	TAG	BICOSE2	Bic2_PL09_Aspi1_Bebe1B	PP916036
bebe2B	R. chacei	Subadult	TAG	BICOSE2	Bic2_PL09_Aspi2_Bebe2B	PP916036
bebe3B	R. chacei	Subadult	TAG	BICOSE2	Bic2_PL09_Aspi2_Bebe3B	PP916023
R26	R. chacei	Subadult	TAG	BICOSE2	Bic2_PL13_Perisc_R261	PP916033
R39	R. chacei	Subadult	TAG	BICOSE2	Bic2_PL910_04_Peris_R39	PP916033
bebe16B	R. chacei	Subadult	Snake Pit	BICOSE2	Bic2_PL15_Aspi5_Bebe16B	PP916032
bebe17B	R. chacei	Subadult	Snake Pit	BICOSE2	Bic2_PL17_Aspi1_Bebe17B	PP916036
bebe24B	R. chacei	Subadult	Snake Pit	BICOSE2	Bic2_PL19_Peris1_Bebe24B	PP916036
bebe25B	R. chacei	Subadult	Snake Pit	BICOSE2	Bic2_PL19_Peris1_Bebe25B	PP916035
bebe24C	R. chacei	Subadult	Snake Pit	BICOSE2	Bic2_PL14_Aspi1_Bebe24C	PP916036
Juv12B	R. exoculata	A	TAG	BICOSE2	Bic2_PL06_Peris1_Juv12B	PP916022
Juv1B	R. exoculata	A	TAG	BICOSE2	Bic2_PL06_Peris1_Juv1B	PP916018
R138	R. exoculata	A	TAG	BICOSE2	Bic2PL912_06_Peris_R138	PP916037
R47	R. exoculata	A	TAG	BICOSE2	Bic2_PL910_04_Peris_R47	PP916034
R59	R. exoculata	A	TAG	BICOSE2	Bic2_PL910_04_Peris_R59	PP916037
Cr040	R. exoculata	A	Snake Pit	Hermine	Her_PL02_Aspi3_Cr040	PP916037
Juv14B	R. exoculata	A	Snake Pit	BICOSE2	Bic2_PL15_Peris1_Juv14B	PP916037
Juv15B	R. exoculata	A	Snake Pit	BICOSE2	Bic2_PL15_Aspi1_Juv15B	PP916037
Juv16B	R. exoculata	A	Snake Pit	BICOSE2	Bic2_PL15_Aspi1_Juv16B	PP916030
Juv17B	R. exoculata	A	Snake Pit	BICOSE2	Bic2_PL15_Aspi1_Juv17B	PP916031
Juv12C	R. exoculata	B	TAG	BICOSE2	Bic2_PL10_Peris1_Juv12C	PP916024
Juv2C	R. exoculata	B	TAG	BICOSE2	Bic2_PL06_Peris1_Juv2C	PP916019
Juv4C	R. exoculata	B	TAG	BICOSE2	Bic2_PL06_Peris1_Juv4C	PP916021
R185	R. exoculata	B	TAG	BICOSE2	Bic2_PL10_Perisc_R185	PP916037
R61	R. exoculata	B	TAG	BICOSE2	Bic2_PL910_04_Peris_R61	PP916037
Cr047	R. exoculata	B	Snake Pit	Hermine	Her_PL02_Aspi3_Cr047	PP916037
Cr048	R. Exoculata	B	Snake Pit	Hermine	Her_PL02_Aspi3_Cr048	PP916038
Juv14C	R. exoculata	B	Snake Pit	BICOSE2	Bic2_PL13_Peris1_Juv14C	PP916037
Juv15C	R. exoculata	B	Snake Pit	BICOSE2	Bic2_PL13_Peris1_Juv15C	PP916025
Juv16C	R. exoculata	B	Snake Pit	BICOSE2	Bic2_PL13_Peris1_Juv16C	PP916026
Cr178	R. exoculata	Subadult	TAG	Hermine	Her_PL13_Aspi1_Cr178	PP916040
Cr179	R. exoculata	Subadult	TAG	Hermine	Her_PL13_Aspi1_Cr179	PP916041
Cr180	R. exoculata	Subadult	TAG	Hermine	Her_PL13_Aspi1_Cr180	PP916042
Cr186	R. exoculata	Subadult	TAG	Hermine	Her_PL13_Aspi1_Cr186	PP916037
Juv3D	R. exoculata	Subadult	TAG	BICOSE2	Bic2_PL06_Peris1_Juv3D	PP916020
Juv17D	R. exoculata	Subadult	Snake Pit	BICOSE2	Bic2_PL13_Peris1_Juv17D	PP916037
R254	R. exoculata	Subadult	Snake Pit	BICOSE2	Bic2_PL13_Perisc_R254	PP916027
R261	R. exoculata	Subadult	Snake Pit	BICOSE2	Bic2_PL13_Perisc_R261	PP916028
R271	R. exoculata	Subadult	Snake Pit	BICOSE2	Bic2_PL13_Perisc_R271	PP916029
R272	R. exoculata	Subadult	Snake Pit	BICOSE2	Bic2_PL13_Perisc_R272	PP916028
Rimi64	R. exoculata	adult	TAG	BICOSE2	BIC2-PL02-ASPI1-Rimi64
Rimi65	R. exoculata	adult	TAG	BICOSE2	BIC2-PL02-ASPI1-Rimi65
Rimi69	R. exoculata	adult	TAG	BICOSE2	BIC2-PL02-ASPI1-Rimi69
Rimi193	R. exoculata	adult	TAG	BICOSE2	BIC2-PL06-PERISCOP-Rimi193
Rimi194	R. exoculata	adult	TAG	BICOSE2	BIC2-PL06-PERISCOP-Rimi194
Rimi198	R. exoculata	adult	TAG	BICOSE2	BIC2-PL06-PERISCOP-Rimi198
Rimi234	R. exoculata	adult	TAG	BICOSE2	BIC2-PL09-ASPI3-Rimi234
Rimi236	R. exoculata	adult	TAG	BICOSE2	BIC2-PL09-ASPI3-Rimi236
Rimi240	R. exoculata	adult	TAG	BICOSE2	BIC2-PL09-ASPI3-Rimi240
Rimi315	R. exoculata	adult	Snake Pit	BICOSE2	BIC2-PL13-ASPI5-Rimi315
Rimi316	R. exoculata	adult	Snake Pit	BICOSE2	BIC2-PL13-ASPI5-Rimi316
Rimi317	R. exoculata	adult	Snake Pit	BICOSE2	BIC2-PL13-ASPI5-Rimi317
Rimi325	R. exoculata	adult	Snake Pit	BICOSE2	BIC2-PL13-ASPI5-Rimi325
Rimi326	R. exoculata	adult	Snake Pit	BICOSE2	BIC2-PL13-ASPI5-Rimi326
Rimi390	R. exoculata	adult	Snake Pit	BICOSE2	BIC2-PL14-PERISCOP-Rimi390
Rimi395	R. exoculata	adult	Snake Pit	BICOSE2	BIC2-PL14-ASPI2-Rimi395
Rimi396	R. exoculata	adult	Snake Pit	BICOSE2	BIC2-PL14-ASPI2-Rimi396
Rimi397	R. exoculata	adult	Snake Pit	BICOSE2	BIC2-PL14-ASPI2-Rimi397
RimiC01	R. chacei	adult	Snake Pit	BICOSE2014	RimiC01Bc14PL05SP_TD_E1
RimiC01	R. chacei	adult	Snake Pit	BICOSE2014	RimiC01Bc14PL05SP_TD_E2
RimiC01	R. chacei	adult	Snake Pit	BICOSE2014	RimiC01Bc14PL05SP_TD_E3
RimiC04	R. chacei	adult	Snake Pit	BICOSE2014	RimiC04Bc14PL05SP_TD_E1
RimiC04	R. chacei	adult	Snake Pit	BICOSE2014	RimiC04Bc14PL05SP_TD_E2
RimiC04	R. chacei	adult	Snake Pit	BICOSE2014	RimiC04Bc14PL05SP_TD_E3
RimiC05	R. chacei	adult	Snake Pit	BICOSE2014	RimiC05Bc14PL05SP_TD_E1
RimiC05	R. chacei	adult	Snake Pit	BICOSE2014	RimiC05Bc14PL05SP_TD_E3
RimiC09	R. chacei	adult	TAG	BICOSE2014	RimiC09Bc14PL10TAG_TD_E1
RimiC09	R. chacei	adult	TAG	BICOSE2014	RimiC09Bc14PL10TAG_TD_E2
RimiC09	R. chacei	adult	TAG	BICOSE2014	RimiC09Bc14PL10TAG_TD_E3
RimiC11	R. chacei	adult	TAG	BICOSE2014	RimiC11Bc14PL10TAG_TD_E1
RimiC11	R. chacei	adult	TAG	BICOSE2014	RimiC11Bc14PL10TAG_TD_E2
RimiC11	R. chacei	adult	TAG	BICOSE2014	RimiC11Bc14PL10TAG_TD_E3
RimiE212	R. exoculata	adult	TAG	BICOSE2014	RimiE212Bc14PL08TAG_TD_E1
RimiE212	R. exoculata	adult	TAG	BICOSE2014	RimiE212Bc14PL08TAG_TD_E2
RimiE212	R. exoculata	adult	TAG	BICOSE2014	RimiE212Bc14PL08TAG_TD_E3
RimiE293	R. exoculata	adult	TAG	BICOSE2014	RimiE293Bc14PL10TAG_TD_E1
RimiE293	R. exoculata	adult	TAG	BICOSE2014	RimiE293Bc14PL10TAG_TD_E2
RimiE293	R. exoculata	adult	TAG	BICOSE2014	RimiE293Bc14PL10TAG_TD_E3
RimiE298	R. exoculata	adult	TAG	BICOSE2014	RimiE298Bc14PL10TAG_TD_E1
RimiE298	R. exoculata	adult	TAG	BICOSE2014	RimiE298Bc14PL10TAG_TD_E2
RimiE298	R. exoculata	adult	TAG	BICOSE2014	RimiE298Bc14PL10TAG_TD_E3

## Sheet: Supplementary Table 2
Decontaminated ASV table (R. chacei and R. exoculata juvenile specimens and R. exoculata adult specimens)
ASV_ID	Rem-100-TD-Cr108	Rem-104-TD-Cr107	Rem-70-TD-bebe12A	Rem-74-TD-R08	Rem-78-TD-R32	Rem-108-TD-bebe13A	Rem-119-TD-bebe15A	Rem-344-TD-bebe24A	Rem-356-TD-Cr051	Rem-364-TD-Cr011	Rem-308-TD-bebe1B	Rem-312-TD-bebe2B	Rem-316-TD-bebe3B	Rem-304-TD-R26	Rem-300-TD-R39	Rem-320-TD-bebe16B	Rem-324-TD-bebe17B	Rem-328-TD-bebe24B	Rem-332-TD-bebe25B	Rem-340-TD-bebe24C	Rem-267-TD-Juv12B	Rem-263-TD-juv1B	Rem-280-TD-R138	Rem-276-TD-R47	Rem-296-TD-R59	Rem-251-TD-Cr040	Rem-231-TD-Juv14B	Rem-235-TD-Juv15B	Rem-239-TD-Juv16B	Rem-243-TD-Juv17B	Rem-179-TD-Juv12C	Rem-163-TD-Juv2C	Rem-171-TD-Juv4C	Rem-187-TD-R185	Rem-191-TD-R61	Rem-219-TD-Cr047	Rem-223-TD-Cr048	Rem-203-TD-Juv14C	Rem-207-TD-Juv15C	Rem-211-TD-Juv16C	Rem-88-TD-Cr178	Rem-127-TD-Cr179	Rem-92-TD-Cr180	Rem-96-TD-Cr186	Rem-53-TD-Juv3D	Rem-155-TD-Juv17D	Rem-143-TD-R254	Rem-131-TD-R261	Rem-135-TD-R271
ASV1	0	0	0	0	0	0	0	0	0	0	0	0	0	0	0	0	0	0	0	0	0	67	0	0	0	0	0	0	0	0	0	0	0	0	0	0	0	0	0	0	0	0	0	0	0	0	0	0	0
ASV2	0	0	0	0	0	0	0	0	43	0	0	66	71	0	0	0	0	13	0	0	0	0	0	0	0	0	0	0	0	0	0	0	0	0	0	0	0	0	0	0	0	0	0	0	0	0	0	0	0
ASV3	0	0	0	0	0	0	0	0	0	0	0	0	0	0	0	0	90	0	0	0	0	0	0	0	0	0	0	0	0	0	0	0	0	0	0	0	0	0	0	0	0	0	0	0	0	0	0	0	0
ASV4	0	0	0	0	0	0	0	0	0	1078	0	0	0	0	0	0	0	0	0	0	0	0	0	0	0	0	0	0	0	0	0	0	0	0	0	0	0	0	0	0	0	0	2	0	0	0	0	0	0
ASV5	0	0	0	0	0	0	0	0	0	0	0	0	0	0	0	0	0	0	0	0	0	0	0	0	0	0	0	0	0	0	0	0	0	0	0	0	0	4	0	0	0	0	0	0	0	0	0	0	0
ASV6	0	0	0	0	0	0	0	0	0	0	0	0	0	0	0	0	0	0	0	0	0	0	7	0	0	0	0	0	0	0	0	0	0	0	0	0	0	0	0	0	0	0	0	0	0	0	0	0	0
ASV7	0	0	0	0	0	0	0	0	0	0	0	0	0	0	0	0	0	0	0	0	0	0	0	0	0	0	0	0	0	0	0	0	0	0	0	0	0	0	0	0	0	0	0	0	0	0	0	0	0
ASV8	0	0	0	0	0	0	0	0	0	0	0	0	0	0	0	0	0	0	0	0	0	0	0	0	0	0	0	0	0	0	0	0	0	0	0	0	0	0	0	0	0	0	0	0	0	0	0	0	0
ASV9	0	0	0	0	0	0	0	0	0	0	0	0	0	0	0	0	0	0	0	0	0	0	0	0	0	16	152	0	0	0	0	0	0	0	0	10	0	0	0	0	0	0	0	0	0	0	0	0	0
ASV10	0	0	0	0	0	0	86	0	0	0	0	0	0	0	0	0	0	0	0	0	0	0	0	0	0	0	34	0	0	0	0	0	0	0	0	0	0	0	0	0	0	0	0	0	0	0	0	0	0
ASV11	0	0	0	0	0	0	0	0	0	0	0	0	0	0	0	0	0	0	0	0	0	0	0	0	0	0	13	26	0	62	0	0	0	0	0	0	0	0	0	13	0	0	0	0	0	0	0	0	0
ASV12	0	4	0	0	0	0	0	0	0	0	0	0	0	0	0	0	0	0	0	0	0	0	0	0	0	0	0	0	0	0	0	0	0	0	0	0	0	0	0	0	0	0	0	0	0	0	0	0	0
ASV13	0	0	0	0	0	0	0	0	0	0	0	0	0	0	0	0	0	0	0	0	0	0	0	0	0	14	0	0	0	0	0	0	0	0	0	137	0	0	0	0	0	0	0	0	0	0	0	0	0
ASV14	0	0	0	0	0	0	0	0	181	0	0	0	0	0	0	0	0	0	0	0	0	0	0	0	0	0	0	0	0	0	0	0	0	0	0	0	0	0	0	0	0	0	0	0	0	0	0	0	0
ASV15	0	0	0	0	0	0	0	0	0	0	0	0	0	0	0	0	0	0	0	0	0	0	0	0	0	0	0	0	0	0	0	0	0	0	0	0	0	0	0	21	0	0	0	0	0	0	0	0	0
ASV16	0	30	0	0	0	0	0	0	21	0	0	0	0	2	0	4	0	0	0	0	0	0	0	0	0	0	0	0	0	332	0	0	0	0	0	0	0	0	0	0	0	0	0	0	0	0	0	0	0
ASV17	0	0	0	0	0	0	0	0	3	0	0	0	0	0	0	0	0	0	0	0	0	0	0	0	0	0	0	0	0	0	0	0	0	0	0	0	0	0	0	0	0	0	0	0	0	0	0	0	0
ASV18	0	0	0	0	0	0	0	0	0	0	0	0	0	0	0	0	0	0	0	0	0	0	40	0	0	0	19	0	10	0	0	0	0	0	0	15	0	0	0	4	0	0	0	0	0	0	0	0	0
ASV19	0	0	0	0	0	0	0	0	0	0	4	23	0	0	9	0	0	0	0	0	8	8	11	0	0	0	0	0	0	0	4	0	4	13	0	0	0	0	0	0	3	0	12	9	0	0	0	0	0
ASV20	0	0	0	0	0	0	0	0	0	3	0	0	0	0	0	0	0	0	0	0	0	0	0	0	0	0	0	0	0	0	0	0	0	0	0	0	0	0	0	0	0	0	0	0	0	0	0	0	0
ASV21	0	0	0	0	0	0	0	0	0	0	0	2	0	0	0	0	0	0	0	0	0	0	0	0	0	0	0	0	0	0	0	0	0	0	0	0	0	0	0	0	0	0	0	0	0	0	0	0	0
ASV22	0	0	0	0	0	0	0	0	0	0	0	0	0	0	0	0	0	0	0	0	0	25	0	0	0	0	0	0	0	0	0	0	0	0	0	0	0	0	0	0	0	0	0	0	0	0	0	0	0
ASV23	0	0	0	0	0	0	0	0	0	0	0	0	0	0	0	0	0	0	205	0	0	0	0	0	0	0	0	0	0	0	0	0	0	0	0	0	0	0	0	0	0	0	0	0	0	0	0	0	0
ASV24	0	0	0	0	0	0	0	0	0	0	0	0	0	0	0	0	0	0	0	0	0	0	0	0	0	0	0	0	0	0	0	0	0	0	0	0	0	0	0	42	0	0	0	0	0	0	0	0	0
ASV25	0	0	0	0	0	0	0	0	0	0	0	0	0	0	0	0	0	0	0	0	0	6	0	0	0	0	0	0	0	0	0	0	0	0	0	0	0	0	0	0	0	0	0	0	0	0	0	0	0
ASV26	0	0	0	0	0	0	0	0	0	0	0	0	0	0	0	0	0	0	0	0	0	0	0	0	0	0	0	5	0	0	0	0	0	0	0	0	0	0	0	0	0	0	0	0	0	0	0	0	0
ASV27	0	0	0	0	0	0	0	0	4	0	0	0	0	0	0	0	0	0	0	0	0	0	0	0	0	0	0	0	0	0	0	0	0	0	0	0	0	0	0	0	0	0	0	0	0	0	0	0	0
ASV28	0	0	0	0	0	0	0	0	0	0	0	0	0	0	0	0	0	0	0	0	0	0	0	0	0	0	0	0	0	0	0	0	0	0	0	0	57	364	1711	5276	0	0	0	0	0	114	468	1291	220
ASV29	0	0	0	0	0	0	0	0	0	0	0	5	0	0	0	0	0	0	0	0	0	0	0	0	0	0	0	0	0	0	0	0	0	0	0	0	0	0	0	0	0	0	0	0	0	0	0	0	0
ASV30	0	0	0	0	0	0	0	0	0	0	0	0	0	0	0	0	0	0	0	0	0	0	0	0	0	0	0	0	0	0	0	0	0	0	0	0	0	0	0	167	0	0	0	0	0	0	0	0	0
ASV31	0	0	0	0	0	0	0	0	0	0	0	0	0	0	0	0	0	0	0	0	0	0	2	0	0	9	0	0	0	0	0	0	0	0	0	29	0	0	0	0	0	0	0	0	0	0	0	0	0
ASV32	0	13	2	0	0	30	38	109	0	0	0	0	0	0	0	0	0	7	0	0	0	7	0	0	3	0	26	9	0	344	0	0	0	0	1	0	0	0	0	0	0	0	0	0	0	0	0	0	0
ASV33	0	0	0	14	0	0	0	0	0	0	0	0	0	0	0	0	0	0	0	0	0	0	0	0	0	0	0	0	0	0	0	0	0	0	0	0	0	0	0	0	0	0	0	0	0	0	0	0	0
ASV34	0	0	0	0	0	0	0	0	0	0	0	0	0	0	0	4	0	0	0	0	0	0	0	0	0	6	15	0	26	0	0	0	0	0	14	23	18	4	0	0	0	0	0	0	0	1	0	0	1
ASV35	0	0	0	0	0	0	0	0	0	0	0	0	0	0	0	0	0	23	0	0	0	0	0	0	0	0	0	0	0	0	0	0	0	0	0	0	0	0	0	0	0	0	0	0	0	0	0	0	0
ASV36	0	0	0	0	0	0	0	0	41	0	0	0	0	0	0	0	0	0	0	0	0	0	0	0	0	0	0	0	0	0	0	0	0	0	0	0	0	0	0	0	0	0	0	0	0	0	0	0	0
ASV37	0	0	0	0	0	0	0	0	0	0	0	0	0	0	0	0	0	0	0	0	0	0	0	0	0	0	5	0	0	0	0	0	0	0	0	0	0	0	0	0	0	0	0	0	0	0	0	0	0
ASV38	0	0	31	0	0	0	0	16	0	0	14	183	614	0	52	0	0	0	0	0	0	0	18	0	0	0	0	0	0	0	0	0	0	0	0	0	0	0	0	0	0	0	0	0	0	0	0	0	0
ASV39	0	0	0	0	0	0	0	0	0	0	0	0	0	0	0	0	0	0	0	0	0	0	0	0	0	0	21	0	0	0	0	0	0	0	0	0	0	7	0	0	0	0	0	0	0	7	0	0	0
ASV40	0	0	0	0	0	0	0	0	0	0	0	0	0	0	0	0	0	0	0	0	0	0	0	0	0	0	0	0	0	0	0	0	0	0	0	0	0	0	0	0	0	0	0	0	0	0	0	0	0
ASV41	0	0	0	0	0	0	0	0	0	0	0	0	0	0	0	0	1038	0	0	0	0	0	0	0	0	0	0	0	0	0	0	0	0	0	0	0	0	0	0	0	0	0	0	0	0	0	0	0	0
ASV42	0	0	0	0	0	0	0	0	0	0	0	0	0	0	0	0	0	0	0	0	0	0	0	0	0	0	0	0	0	0	0	0	0	0	0	0	0	0	0	0	0	0	0	0	0	0	0	0	0
ASV43	0	0	0	0	0	0	0	0	0	0	0	0	0	0	0	0	0	0	0	0	98	723	136	0	0	203	0	9	0	0	0	0	8	0	0	11	0	0	0	0	0	17	14	50	15	0	0	0	0
ASV44	0	8	0	0	0	0	0	0	0	0	0	0	0	0	0	0	0	0	0	0	0	0	0	0	0	0	227	0	0	0	0	0	0	0	0	0	0	0	0	0	0	0	0	0	0	0	0	0	0
ASV45	0	0	0	0	0	0	0	0	0	0	0	0	0	0	0	0	0	0	0	0	0	0	0	0	0	0	0	0	0	0	0	0	0	0	0	0	0	0	0	1476	0	0	0	0	0	0	0	0	0
ASV46	0	0	0	0	0	0	0	0	0	0	0	0	0	0	0	0	0	0	0	0	0	0	0	0	0	0	0	0	0	0	0	0	0	0	0	0	0	0	0	0	3	0	0	0	0	0	0	0	0
ASV47	0	0	0	0	0	0	0	6	0	0	0	0	0	0	0	0	0	0	0	0	0	0	0	0	0	0	0	0	0	0	0	0	0	0	0	0	0	0	0	0	0	0	0	0	0	0	0	0	0
ASV48	0	0	0	0	0	0	4	17	12	0	0	0	0	0	0	0	680	0	0	0	0	0	0	0	49	0	0	0	0	0	0	0	0	0	0	0	0	0	0	9	0	0	0	0	0	0	0	0	0
ASV49	0	0	0	0	0	0	0	0	0	0	0	0	0	0	0	0	0	0	0	0	0	0	0	0	0	0	0	0	0	0	0	0	0	0	0	0	0	0	0	0	0	0	0	0	0	0	0	0	0
ASV50	0	0	0	0	0	940	0	0	0	0	0	31	0	4	0	0	0	0	0	0	0	0	0	34	0	0	0	0	0	0	0	0	0	0	0	0	7	0	0	0	0	0	0	3	0	4	0	0	2
ASV51	0	0	0	0	0	0	0	0	0	0	0	0	0	0	0	0	0	0	0	0	0	0	0	0	0	0	0	0	0	0	0	0	0	0	0	0	0	0	0	0	0	0	0	0	0	0	0	0	0
ASV52	0	0	0	0	0	0	0	0	0	0	0	0	0	0	0	0	0	0	0	0	0	0	0	0	0	0	0	0	0	0	0	0	0	0	0	0	0	0	0	0	6	0	0	0	0	0	0	0	0
ASV53	0	0	0	0	0	0	0	0	0	0	0	0	0	0	0	0	0	0	0	4	0	0	0	0	0	0	273	0	0	0	0	0	0	0	0	4	0	0	0	0	0	0	8	0	0	0	0	0	0
ASV54	0	0	0	0	0	0	0	0	0	0	0	0	0	0	0	0	0	0	0	0	0	0	0	0	0	0	0	0	0	0	0	0	0	0	0	0	0	0	0	0	0	0	0	0	0	0	0	0	0
ASV55	0	0	0	0	0	0	0	0	0	0	0	0	113	0	0	0	0	0	0	0	0	0	0	0	0	0	0	0	0	0	0	0	0	0	0	0	0	0	0	0	0	0	0	0	0	0	0	0	0
ASV56	0	0	0	0	0	0	0	0	0	0	0	0	0	0	0	0	0	0	0	0	0	0	0	0	0	0	9	0	0	0	0	0	0	0	0	0	0	0	0	0	0	0	0	0	0	0	0	0	0
ASV57	155	0	0	0	8	0	0	72	245	0	0	0	14	0	0	0	0	185	3061	48	0	0	0	0	0	257	2591	53	491	100	0	0	0	0	0	1611	279	2053	384	835	0	0	0	0	0	2172	9560	1318	1145
ASV58	0	0	0	0	0	0	0	0	0	0	0	0	0	0	0	0	0	0	0	0	0	0	0	0	0	0	1281	10	0	0	0	0	0	0	0	0	0	0	0	0	0	0	0	0	0	0	0	0	0
ASV59	0	0	0	0	0	0	0	0	0	0	0	0	0	0	0	0	0	0	0	0	0	0	0	0	0	11	0	0	0	0	0	0	0	0	0	0	0	0	0	0	0	0	0	0	0	0	0	0	0
ASV60	0	0	0	0	0	0	210	0	0	0	0	0	0	0	0	0	0	0	0	0	0	0	0	0	0	0	0	0	0	158	0	0	0	0	0	0	0	0	0	0	0	0	0	0	0	0	0	0	0
ASV61	0	0	0	0	0	0	0	0	0	0	0	0	0	0	0	0	0	0	0	0	0	0	0	0	0	0	0	0	0	2	0	0	0	0	0	0	0	0	0	0	0	0	0	0	0	0	0	0	0
ASV62	0	0	0	0	0	0	0	0	0	0	0	0	0	0	0	0	0	0	0	0	0	0	0	0	0	0	0	0	0	0	32	0	0	0	0	0	0	0	0	0	0	0	0	0	0	0	0	0	0
ASV63	0	0	0	0	0	7	0	0	0	0	0	0	0	0	0	0	0	0	59	8	0	0	0	0	0	0	0	0	0	0	0	0	0	0	0	0	0	0	0	0	0	0	0	0	0	0	0	0	0
ASV64	0	0	0	0	0	0	0	0	0	0	0	0	0	0	0	0	0	0	0	0	7	10	0	0	0	0	0	0	0	0	0	0	0	0	0	0	0	0	0	0	0	12	13	63	0	0	0	0	0
ASV65	0	0	0	0	0	0	0	0	0	0	0	0	0	0	0	0	0	0	0	0	0	0	0	0	0	0	0	0	0	0	0	0	0	0	0	0	0	0	0	0	0	0	0	0	0	0	0	0	0
ASV66	0	0	0	0	0	0	0	0	0	0	0	0	0	0	0	0	0	7	0	0	0	0	0	0	0	0	0	0	0	0	0	0	0	0	0	0	0	0	0	0	0	0	0	0	0	0	0	0	0
ASV67	0	0	0	0	0	0	0	0	0	0	0	0	0	0	0	0	0	0	0	0	0	0	0	0	0	0	0	0	0	190	0	0	0	0	0	0	0	0	0	0	0	0	0	0	0	0	0	0	0
ASV68	60	0	0	0	0	2136	81	0	0	0	0	0	234	0	0	1293	0	0	246	0	0	0	0	0	0	0	0	9	0	0	0	0	0	0	0	0	0	0	8	16	0	0	0	0	0	0	0	0	0
ASV69	0	0	0	0	0	0	0	0	0	0	0	0	0	0	0	0	0	0	0	0	0	0	18	0	0	0	0	0	0	0	0	0	0	0	0	0	0	0	0	0	0	0	0	0	0	0	0	0	0
ASV70	0	0	0	0	0	0	0	0	0	0	0	0	0	0	0	0	0	0	3	0	0	0	0	0	0	0	0	0	17	24	0	0	0	0	0	51	0	0	5	0	0	0	0	0	0	0	0	0	4
ASV71	0	0	0	0	0	0	0	0	0	0	0	0	0	0	0	105	0	0	0	0	0	0	3	0	0	0	0	0	0	0	0	0	0	0	0	0	0	0	0	0	0	4	0	0	0	0	0	0	0
ASV72	0	29	4510	0	0	0	0	0	1525	0	11142	387	227	0	90	0	0	0	0	0	2208	0	0	1892	266	16869	0	0	5691	0	2250	14010	8275	210	0	0	0	9988	8673	0	0	848	0	308	12519	9041	6588	6305	17158
ASV73	0	0	0	0	0	0	0	26	0	0	0	0	0	0	0	0	0	0	0	0	0	0	0	0	0	0	36	0	0	0	0	0	0	0	0	0	0	0	0	0	0	0	0	0	0	0	0	0	0
ASV74	0	0	0	0	0	0	13	0	0	0	0	0	0	0	0	0	0	0	0	0	9	31	17	0	0	0	0	17	0	0	0	0	0	0	6	0	0	3	15	15	0	3	0	8	10	0	0	3	0
ASV75	0	0	0	0	0	0	0	0	0	0	39	41	2	0	23	0	0	0	0	0	0	0	5	0	18	0	0	0	0	0	0	0	0	0	0	0	0	0	0	0	0	0	0	0	0	0	0	0	0
ASV76	0	0	0	0	0	0	0	0	0	31	0	0	0	0	0	0	0	0	0	0	0	0	0	0	0	0	0	0	0	0	0	0	0	0	0	0	0	0	0	0	0	0	0	0	0	0	0	0	0
ASV77	0	0	0	0	0	0	0	0	0	0	0	0	0	0	0	0	0	0	0	0	0	0	0	0	0	0	0	0	0	0	0	0	0	0	0	0	0	0	0	0	0	0	0	0	0	0	0	0	0
ASV78	0	0	0	0	0	0	0	0	0	0	0	0	0	0	0	0	0	0	0	0	0	0	47	0	0	0	0	0	0	0	0	0	0	0	0	0	0	0	0	0	0	0	0	0	0	0	0	0	0
ASV79	0	0	0	0	0	0	0	0	0	0	0	0	0	0	0	0	0	0	0	0	0	0	0	0	0	0	0	0	0	0	0	0	0	0	0	0	0	0	0	0	0	0	0	0	0	0	0	0	0
ASV80	0	0	0	0	0	0	0	0	0	0	0	0	0	0	0	0	0	16	0	20	0	13	7	0	13	0	0	0	0	0	0	0	0	0	0	0	0	0	0	0	0	0	0	0	0	0	0	0	0
ASV81	0	0	0	0	0	0	0	0	0	0	0	0	0	0	0	0	0	0	0	4	0	0	0	0	0	5	0	8	0	0	0	0	0	0	0	0	0	0	0	0	0	0	0	0	0	0	0	0	0
ASV82	0	165	0	0	0	0	8	0	0	0	0	0	0	0	0	0	1304	0	0	0	0	0	0	0	6	0	0	0	0	0	0	0	0	0	0	0	0	0	0	0	0	0	0	0	0	0	0	0	0
ASV83	0	0	0	0	0	0	0	0	0	0	0	0	0	0	0	0	0	0	0	0	0	0	0	0	0	0	734	0	0	0	0	0	0	0	0	0	0	0	0	0	0	0	0	0	0	0	0	0	0
ASV84	0	0	0	0	0	0	0	0	0	0	0	0	0	0	0	0	0	0	0	0	0	0	0	0	0	0	0	0	0	0	0	0	0	0	0	0	0	0	0	0	0	0	0	0	0	0	0	0	0
ASV85	0	0	0	0	0	0	0	0	7	0	0	0	0	0	0	6	0	0	0	0	0	0	0	0	0	0	0	0	6	0	0	0	0	0	0	13	0	0	0	0	0	0	0	0	0	0	0	0	0
ASV86	0	0	0	0	0	0	14	0	0	0	0	0	0	0	0	0	0	0	0	0	0	0	0	0	0	0	0	0	0	0	0	0	0	0	0	0	0	0	0	0	0	0	0	0	0	0	0	0	0
ASV87	0	0	0	0	0	0	0	14	0	0	0	0	0	0	0	0	0	0	0	0	0	0	0	0	0	0	0	0	0	0	0	0	0	0	0	0	0	0	0	0	0	0	0	0	0	0	0	0	0
ASV88	0	0	0	0	0	0	0	0	0	0	0	0	0	0	0	0	0	0	0	0	0	0	0	0	0	7	0	0	0	0	0	0	0	0	0	53	0	0	0	0	0	0	0	0	0	0	0	0	0
ASV89	0	0	0	0	0	0	0	0	6	0	0	0	0	0	0	0	0	0	0	0	0	0	0	0	0	0	0	0	0	0	0	0	0	0	0	0	0	0	0	0	0	0	0	0	0	0	0	0	0
ASV90	28	270	3	2	9	0	0	0	0	0	21	0	0	0	0	0	0	0	0	0	364	1482	687	0	46	27	0	0	0	0	128	19	27	98	0	0	0	0	0	0	0	0	0	17	17	0	0	0	0
ASV91	0	0	0	0	0	0	0	0	0	0	6	0	0	0	0	0	0	0	0	0	6	45	10	0	0	0	5	0	0	0	0	0	0	0	0	0	0	0	0	0	0	11	0	49	0	0	0	0	0
ASV92	0	0	0	0	0	83	90	58	690	0	0	0	0	0	0	352	1910	925	916	164	0	0	0	0	0	35	210	0	183	263	0	0	0	0	0	31	0	23	0	0	0	0	0	0	0	0	37	21	25
ASV93	0	0	0	0	0	0	39	0	0	0	0	0	0	0	0	0	0	0	0	0	0	0	0	0	0	0	0	0	0	0	0	0	0	0	0	0	0	0	0	0	0	0	0	0	0	0	0	0	0
ASV94	0	0	0	0	0	0	0	0	13	0	0	0	0	0	0	0	0	0	0	0	0	0	0	0	0	0	0	0	0	0	0	0	0	0	0	0	0	0	0	0	0	0	0	0	0	0	0	0	0
ASV95	0	0	0	0	0	0	0	0	0	0	0	0	0	0	0	0	0	0	0	0	0	0	2	0	0	0	0	0	0	0	0	0	0	0	0	0	0	0	0	0	0	0	0	0	0	0	0	0	0
ASV96	0	0	0	0	0	0	0	0	0	0	0	0	225	0	0	0	0	0	0	0	0	0	0	0	0	0	0	0	0	0	0	0	0	0	0	0	0	0	0	0	0	0	0	0	0	0	0	0	0
ASV97	0	0	0	0	0	0	0	14	0	0	0	0	0	0	0	0	0	0	0	0	0	0	0	0	0	0	0	0	0	0	0	0	0	0	0	0	0	0	0	0	0	0	0	0	0	0	0	0	0
ASV98	0	0	0	0	0	0	0	0	0	0	0	0	0	0	0	0	0	0	0	0	0	0	0	0	0	0	0	0	0	0	0	0	0	0	0	0	0	0	0	0	0	0	0	0	0	0	0	0	0
ASV99	0	0	0	0	0	0	0	0	0	0	0	0	0	0	0	0	0	0	0	0	0	0	0	0	0	0	0	0	0	0	0	0	0	0	0	0	0	0	0	0	0	0	0	0	0	0	0	0	0
ASV100	0	0	0	0	0	0	0	0	0	0	0	0	0	0	0	0	0	30	0	0	0	0	0	0	0	0	0	0	0	0	0	0	0	0	0	0	0	0	0	0	0	0	0	0	0	0	0	0	0
ASV101	0	0	0	0	0	0	0	0	0	0	0	0	0	0	0	304	0	0	0	0	0	0	0	0	0	0	0	0	0	0	0	0	0	0	0	0	0	0	0	0	0	0	0	0	0	0	0	0	0
ASV102	0	40	50	91	18	16	0	0	0	0	270	459	52	0	697	0	0	89	121	0	100	160	164	767	938	0	60	0	3432	0	399	110	132	253	1371	266	0	205	65	102	35	223	367	75	501	55	169	147	58
ASV103	0	0	0	0	0	0	0	0	0	0	0	0	0	0	0	0	0	0	0	0	0	0	0	0	0	0	0	0	0	0	0	0	0	0	0	0	0	11	0	0	0	0	0	0	0	0	0	0	0
ASV104	0	0	0	0	0	0	0	107	0	0	0	0	0	0	0	0	0	0	0	0	0	0	21	0	0	0	6	0	0	0	0	0	0	0	0	0	0	0	0	0	0	0	0	0	0	0	0	0	0
ASV105	0	0	0	0	0	0	0	0	0	0	0	0	0	0	0	0	0	0	0	0	0	0	0	0	0	0	0	0	0	0	0	0	0	0	0	0	0	0	0	4	0	0	0	0	0	0	0	0	0
ASV106	0	0	0	0	0	0	0	0	0	0	0	0	0	0	0	0	0	0	0	0	2	0	0	0	0	0	0	0	0	0	0	0	0	0	0	0	0	0	0	0	0	0	0	0	0	0	0	0	0
ASV107	0	17	26	0	0	0	0	0	0	0	0	0	0	0	6	0	0	0	0	0	391	17	0	0	0	0	0	0	0	0	6	3	1	0	0	0	0	0	0	0	23	4	78	0	0	0	0	0	0
ASV108	0	0	0	0	0	0	0	0	0	0	0	0	0	0	0	0	0	0	0	0	0	0	15	0	0	0	0	0	0	0	0	0	0	0	0	0	0	0	0	0	0	0	0	0	0	0	0	0	0
ASV109	0	24	0	0	0	0	0	0	0	0	0	0	0	0	0	0	0	0	0	0	7	0	0	0	0	0	0	4	0	0	16	0	0	0	0	0	0	0	0	0	0	0	0	0	0	0	0	0	0
ASV110	0	0	0	0	0	0	0	0	174	0	0	0	0	0	0	0	0	0	9	0	0	81	264	279	0	39	0	0	662	0	0	0	0	0	0	653	0	0	60	10	0	0	0	0	0	0	45	7	0
ASV111	0	0	0	0	0	0	0	0	0	0	0	0	55	0	0	0	0	0	0	0	0	0	0	0	0	0	0	0	0	0	0	0	0	0	0	0	0	0	0	0	0	0	0	0	0	0	0	0	0
ASV112	0	0	0	0	0	0	0	0	0	0	0	0	0	0	0	0	0	0	0	0	0	0	0	0	0	0	0	0	0	0	0	0	0	0	0	0	0	0	0	0	0	0	0	0	0	0	0	0	0
ASV113	0	0	0	0	0	61	22	0	0	0	0	0	0	0	0	0	0	0	37	58	0	0	0	0	0	19	129	26	0	0	0	0	0	0	0	0	0	0	0	0	0	77	0	34	0	0	0	0	0
ASV114	0	0	0	0	0	0	0	0	0	0	0	0	0	0	0	0	0	0	0	0	0	0	11	0	0	0	0	0	0	0	0	0	0	0	0	3	0	0	0	0	0	0	0	0	0	0	0	0	0
ASV115	0	0	0	0	0	0	0	0	0	0	0	0	0	0	0	0	0	0	0	0	0	4	52	0	0	0	0	0	0	0	0	0	0	0	0	4	0	0	0	0	0	0	0	0	0	0	0	0	0
ASV116	0	0	0	0	0	0	0	0	0	0	0	0	0	0	0	0	0	0	0	0	0	0	0	0	0	0	0	0	0	0	0	0	0	0	2	0	0	0	0	0	0	0	0	0	0	0	0	0	0
ASV117	0	0	0	0	0	0	0	0	0	0	0	0	0	0	0	0	0	0	0	0	0	0	0	0	0	0	0	0	0	0	0	0	0	0	0	0	0	0	0	383	0	0	0	0	0	0	0	0	0
ASV118	0	0	17	0	0	0	0	132	1343	0	0	0	373	0	17	0	0	12	0	0	0	0	0	0	0	0	0	0	0	0	0	0	0	0	0	0	0	0	0	0	0	0	0	0	0	0	0	0	0
ASV119	0	29	27	9	0	0	0	0	81	0	22	172	73	0	191	0	0	0	0	0	0	3	0	0	5	0	0	0	0	0	0	0	0	0	8	0	0	0	0	0	0	0	0	0	0	0	0	0	0
ASV120	0	0	0	0	0	0	0	20	0	0	0	0	0	0	0	0	0	0	0	0	0	0	0	0	0	0	0	0	0	0	0	0	0	0	0	0	0	0	0	0	0	0	0	0	0	0	0	0	0
ASV121	0	0	0	0	0	0	0	0	62	0	0	0	0	0	0	0	0	0	0	0	0	0	0	0	0	0	0	0	0	0	0	0	0	0	0	0	0	0	0	0	0	0	0	0	0	0	0	0	0
ASV122	156	0	0	0	0	0	0	0	0	0	0	0	0	0	0	0	0	0	0	0	0	0	0	0	0	0	0	0	0	0	0	0	0	0	0	0	0	0	0	0	0	0	0	0	0	0	0	0	0
ASV123	212	0	0	0	0	2	12	0	26	0	24	44	0	0	27	8	0	22	97	55	29	58	158	297	127	37	40	4	106	0	41	46	0	126	132	757	7	194	85	20	0	24	13	1	207	196	22	59	170
ASV124	0	0	0	0	0	0	0	0	0	0	0	0	0	0	0	0	0	0	0	0	0	0	0	0	0	0	0	0	0	0	0	0	0	0	0	0	0	0	0	0	0	2	0	0	0	0	0	0	0
ASV125	0	0	0	0	0	0	0	0	0	0	0	0	0	0	0	0	0	0	0	0	0	0	0	0	0	0	0	47	0	0	0	0	0	0	0	0	0	0	0	0	0	0	0	0	0	0	0	0	0
ASV126	59	0	0	0	0	29	0	0	0	0	0	0	0	0	27	0	0	35	0	0	0	0	0	203	0	75	0	12	25	0	0	0	0	0	206	148	0	46	0	0	0	0	0	0	74	0	57	0	0
ASV127	0	53	0	0	0	0	14	0	0	65	0	0	0	0	0	0	0	0	0	0	0	0	0	0	0	0	0	0	0	0	0	0	0	0	0	0	0	0	0	0	0	0	0	0	0	0	0	0	0
ASV128	0	0	0	0	0	0	23	0	95	0	0	32	0	0	42	0	0	0	0	7	0	0	0	0	0	0	0	0	0	0	0	0	0	0	0	0	0	0	0	0	0	0	0	0	0	0	0	0	0
ASV129	0	0	0	0	0	0	0	0	0	0	0	0	0	0	0	0	0	0	0	0	0	0	0	0	0	0	0	0	0	0	0	0	0	0	0	9	0	0	7	0	0	0	0	0	0	0	0	0	0
ASV130	0	0	0	0	0	0	0	0	0	0	0	0	0	0	0	0	0	0	0	0	0	0	0	0	0	0	0	0	0	0	0	0	0	0	0	0	0	0	0	0	0	0	0	0	0	0	0	0	0
ASV131	0	0	0	0	0	0	0	24	5	0	0	0	1	0	0	0	0	0	0	0	0	0	5	0	0	0	0	0	0	126	0	0	0	0	0	0	0	0	0	0	0	0	0	0	0	0	0	0	0
ASV132	0	0	0	18	7	0	0	0	0	0	0	11	0	16	0	0	0	81	0	0	0	0	4	0	0	0	0	0	0	0	0	0	0	0	0	0	0	0	0	0	0	0	15	15	0	0	0	0	0
ASV133	0	0	0	0	0	0	0	0	2	0	39	30	4	14	91	0	0	0	0	0	0	0	15	0	0	0	0	0	0	0	0	0	0	0	0	0	0	0	0	0	0	0	0	0	0	0	0	0	0
ASV134	0	0	0	0	0	0	0	0	0	0	0	0	0	0	0	0	0	0	0	0	0	0	0	0	0	0	0	0	0	0	0	0	0	0	0	0	0	0	0	11	0	0	0	0	0	0	0	0	0
ASV135	0	0	0	0	0	0	0	0	8	0	0	0	0	0	0	0	0	0	0	0	0	0	0	0	0	0	0	0	0	0	0	0	0	0	0	0	0	0	0	0	0	0	0	0	0	0	0	0	0
ASV136	0	0	0	0	0	0	0	38	0	0	0	0	0	0	0	0	0	0	0	0	0	0	0	0	0	0	0	0	0	0	0	0	0	0	0	0	0	0	0	0	0	0	0	0	0	0	0	0	0
ASV137	0	0	0	0	0	0	0	0	0	0	0	0	0	0	0	0	0	0	0	0	0	0	0	0	0	0	0	0	0	0	0	0	0	0	0	0	0	0	0	0	0	0	0	0	0	0	0	0	0
ASV138	0	3	0	0	0	0	0	0	0	0	0	0	0	0	0	0	0	0	0	0	0	0	0	0	0	0	0	0	0	0	0	0	0	0	0	0	0	0	0	0	0	0	0	0	0	0	0	0	0
ASV139	0	22	0	4	3	0	0	0	0	0	0	0	3	0	6	0	0	0	0	0	24	32	0	0	0	0	0	13	0	0	15	0	0	0	0	12	0	0	0	0	0	0	0	0	0	0	0	0	0
ASV140	0	0	0	0	0	0	0	0	0	0	0	0	0	0	0	0	0	0	0	0	13	24	584	0	8	69	0	0	0	0	28	0	5	0	0	9	0	0	0	0	0	7	0	62	7	0	0	0	0
ASV141	0	0	0	0	0	0	0	0	0	0	0	0	0	0	0	0	0	0	0	0	0	0	0	0	0	0	0	0	0	0	0	0	0	0	0	3	0	0	0	0	0	0	0	0	0	0	0	0	0
ASV142	0	0	0	0	0	0	0	0	0	0	0	0	0	0	0	0	0	0	0	0	0	0	0	0	0	0	0	0	0	0	0	0	0	0	0	0	0	0	0	0	0	0	0	0	0	0	0	0	0
ASV143	0	0	0	0	0	0	0	0	0	0	0	0	0	0	0	0	0	0	0	0	0	0	0	0	0	0	0	0	0	0	0	0	0	0	0	0	0	0	0	0	0	0	0	0	0	0	0	0	0
ASV144	0	0	0	0	0	0	0	0	0	0	0	0	0	0	0	0	81	0	0	0	0	0	0	0	0	0	0	0	0	0	0	0	0	0	0	0	0	0	0	0	0	0	0	0	0	0	0	0	0
ASV145	0	0	0	0	0	0	0	0	0	0	0	0	0	0	0	0	0	0	0	0	0	0	0	0	0	0	0	0	0	99	0	0	0	0	0	0	0	0	0	0	0	0	0	0	0	0	0	0	0
ASV146	0	0	0	0	0	0	0	0	0	0	0	0	0	0	0	0	826	0	0	0	0	0	0	0	0	0	0	0	0	0	0	0	0	0	0	0	0	0	0	0	0	0	0	0	0	0	0	0	0
ASV147	0	0	0	0	0	0	0	0	0	0	0	0	0	0	0	0	0	0	0	0	0	0	0	0	0	0	0	0	0	0	0	0	0	0	0	0	0	0	0	0	0	0	0	0	0	0	0	0	0
ASV148	0	0	0	0	0	4	0	0	0	0	0	0	0	0	0	0	0	0	0	0	0	0	0	0	0	0	0	0	0	0	0	0	0	0	0	0	0	0	0	0	0	0	0	0	0	0	0	0	0
ASV149	0	0	0	0	0	0	0	0	0	0	0	0	0	0	0	0	0	0	0	0	8	0	17	0	0	0	0	0	0	0	0	3	0	0	0	0	0	0	0	0	0	0	0	0	10	0	0	0	0
ASV150	0	0	0	0	8	0	0	12	26	0	0	0	0	8	19	6	0	215	322	373	0	0	112	0	10	0	97	39	12	0	0	0	0	0	44	39	8	510	58	81	0	0	0	28	66	490	76	74	84
ASV151	0	5	0	2	8	0	0	0	13	0	123	87	188	8	141	18	0	0	0	0	20	27	118	137	32	161	0	0	0	0	13	17	1	33	84	18	7	0	0	0	0	12	14	0	41	0	0	0	3
ASV152	0	0	0	0	0	0	0	31	0	0	0	0	0	0	0	0	0	0	0	0	0	0	0	0	0	0	0	0	0	0	0	0	0	0	0	0	0	0	0	0	0	0	0	0	0	0	0	0	0
ASV153	0	0	0	0	0	0	0	0	0	0	0	0	0	0	0	0	0	0	0	0	0	0	115	16	0	0	0	0	0	0	5	45	0	0	0	0	0	0	0	0	0	0	0	4	236	0	0	0	0
ASV154	0	0	0	0	0	0	0	0	0	0	0	0	0	0	0	0	0	0	0	0	0	0	0	0	0	0	0	159	0	0	0	0	0	0	0	0	0	0	0	0	0	0	0	0	0	0	0	0	0
ASV155	0	0	0	0	0	0	0	0	0	0	0	0	0	0	0	0	0	0	0	0	0	0	0	0	0	0	0	0	0	0	0	0	0	0	0	6	0	0	0	0	0	0	0	0	0	0	0	0	0
ASV156	0	0	0	0	0	0	0	0	0	0	0	0	0	0	0	0	0	0	0	0	0	0	0	0	0	0	0	609	0	473	0	0	0	0	0	0	0	0	0	8	0	0	0	0	0	0	0	0	0
ASV157	0	0	0	0	0	0	0	0	0	200	0	0	0	0	0	0	0	0	0	0	0	0	0	0	0	0	7	0	0	0	0	0	0	0	0	0	0	0	0	0	0	0	0	0	0	0	0	0	0
ASV158	0	0	0	0	0	0	0	0	0	0	0	0	0	0	0	0	0	0	0	0	0	0	0	0	0	0	56	0	0	0	0	0	0	0	0	0	0	0	0	0	0	0	0	0	0	0	0	0	0
ASV159	0	0	0	0	0	0	0	0	0	0	0	0	0	0	0	0	0	0	0	0	0	0	0	0	0	0	0	0	0	0	0	0	0	0	0	0	0	0	0	0	0	0	0	0	0	0	0	0	0
ASV160	0	0	0	0	0	0	0	0	0	177	0	0	0	0	0	0	0	0	0	0	0	0	0	0	0	0	0	0	0	0	0	0	0	0	0	0	0	0	0	0	0	0	0	0	0	0	0	0	0
ASV161	169	0	0	0	0	0	0	0	0	0	0	0	0	0	0	0	0	0	0	0	0	0	0	0	0	0	0	0	16	0	0	0	0	0	0	0	0	0	0	0	0	0	0	0	0	0	0	0	0
ASV162	0	0	0	0	0	0	0	0	0	0	0	0	0	0	0	8951	290	15815	0	2363	0	0	0	0	0	0	0	0	0	0	0	0	0	0	0	0	0	182	0	401	0	0	0	0	0	0	0	0	0
ASV163	0	0	0	0	0	0	0	0	0	0	0	0	0	0	0	0	0	0	0	0	0	0	0	0	0	0	0	0	0	0	0	0	0	0	0	0	0	0	0	0	0	0	0	0	0	0	0	0	0
ASV164	0	0	0	0	0	0	0	0	0	0	0	0	0	0	0	0	0	0	0	0	0	0	0	0	0	0	0	0	0	0	0	0	0	0	0	0	0	0	0	0	0	0	0	0	0	0	0	0	0
ASV165	0	0	0	0	0	0	21	0	0	0	0	0	0	0	0	0	0	0	0	0	0	0	7	0	0	0	0	0	0	0	0	0	0	0	0	0	0	0	0	0	0	0	0	0	0	0	0	0	0
ASV166	0	0	0	0	0	0	0	0	0	0	0	0	0	0	0	0	0	0	0	0	0	0	36	0	0	0	0	0	0	0	0	3	0	0	0	0	0	0	0	0	0	0	0	0	0	0	0	0	0
ASV167	0	0	0	0	0	0	0	0	0	0	0	0	0	0	0	0	0	0	0	0	0	0	0	15	0	0	0	0	0	0	0	0	0	0	20	0	0	0	0	0	0	0	0	0	0	0	0	0	0
ASV168	0	0	0	0	0	0	34	0	0	0	0	0	0	0	0	0	0	21	0	0	0	0	0	0	0	0	0	0	0	0	0	0	0	0	0	0	0	0	0	0	0	0	0	0	0	0	0	0	0
ASV169	0	56	0	315	74	21	0	0	0	0	0	0	0	78	39	0	0	0	198	0	0	36	169	0	171	24	136	4251	42	0	0	28	0	36	0	109	0	0	17	12	0	12	0	34	15	8	37	7	16
ASV170	652	201	0	0	0	0	0	0	0	0	0	0	0	0	0	0	0	0	0	0	30	0	0	0	0	0	0	1085	0	366	26	0	0	0	0	0	0	0	0	0	0	0	0	0	0	0	0	0	0
ASV171	838	519	187	47	5230	87	93	76	0	123	158	642	1217	316	341	0	0	0	0	0	519	148	82	0	154	13	7271	2273	0	0	275	271	0	89	34	0	0	0	0	0	0	82	0	130	0	0	0	0	0
ASV172	0	0	0	0	0	0	0	0	0	0	0	0	6	0	0	0	0	0	0	0	0	0	0	0	0	0	0	0	0	0	0	0	0	0	0	0	0	0	0	0	0	0	0	0	0	0	0	0	0
ASV173	0	0	0	0	0	0	0	0	0	0	0	0	0	0	0	0	0	0	0	0	0	0	0	0	0	0	0	0	0	0	0	0	0	0	0	0	0	0	0	0	0	0	0	0	0	0	0	0	0
ASV174	0	0	0	0	0	0	0	0	0	0	0	0	0	0	0	0	0	0	0	0	323	0	0	0	0	0	0	0	0	0	0	0	82	171	0	0	0	0	0	0	217	0	97	2530	0	0	0	0	0
ASV175	0	0	0	0	0	0	0	0	0	0	0	0	0	0	0	0	0	0	0	0	0	0	0	0	0	0	0	0	0	0	0	0	0	0	0	0	0	0	0	0	0	0	0	0	0	0	0	0	0
ASV176	0	0	0	0	0	579	0	0	151	0	18	0	0	0	0	109	0	0	0	0	0	0	0	0	0	0	0	0	0	0	0	0	0	0	0	0	7	0	0	0	0	0	0	0	0	0	0	0	0
ASV177	0	0	0	0	0	97	0	0	0	0	0	0	0	0	0	0	0	0	89	11	0	0	0	0	0	0	0	0	0	0	0	0	0	0	0	0	0	0	0	0	0	0	0	0	0	0	0	0	0
ASV178	1125	0	0	0	0	0	0	0	0	0	0	0	0	0	0	0	0	0	0	0	0	0	0	0	0	0	9	0	0	0	0	0	0	0	0	0	0	0	0	0	0	0	0	0	0	0	0	0	0
ASV179	0	0	0	0	0	0	0	35	0	0	0	0	0	0	0	0	0	0	0	0	0	0	0	0	0	0	0	0	0	0	0	0	0	0	0	0	0	0	0	0	0	0	0	0	0	0	0	0	0
ASV180	41	0	0	123	16	0	0	0	0	0	0	0	0	0	44	0	0	0	0	0	0	0	0	0	0	0	0	0	0	0	13	0	0	0	0	0	0	0	0	0	0	0	0	34	0	0	0	0	0
ASV181	0	0	0	0	0	0	0	0	0	0	0	0	0	0	0	0	0	0	0	0	0	0	0	0	0	0	0	0	0	0	0	0	4	0	0	0	0	0	0	0	0	0	0	0	6	0	0	0	0
ASV182	0	0	0	0	0	0	0	0	0	0	0	0	0	0	0	0	0	0	0	0	0	0	0	0	0	0	0	5	0	0	0	0	0	0	0	0	0	0	0	0	0	0	0	0	0	0	0	0	0
ASV183	0	18	0	0	0	0	0	0	0	0	0	0	0	0	0	0	0	0	0	0	0	0	0	0	0	0	0	0	0	0	0	0	0	0	0	0	0	0	0	0	0	0	0	0	0	0	0	0	0
ASV184	0	0	0	0	0	0	1518	0	0	0	0	0	0	0	0	0	0	0	0	0	0	0	0	0	0	0	0	0	0	0	0	0	0	0	0	0	0	0	0	0	0	0	0	0	0	0	0	0	0
ASV185	0	0	0	0	3	0	0	13	0	0	0	0	0	0	0	0	0	0	0	0	0	4	0	260	118	0	0	0	0	0	0	0	0	5	0	0	0	0	0	0	0	0	3	0	0	0	0	0	0
ASV186	0	0	0	0	0	0	0	0	0	345	0	0	0	0	0	0	0	0	0	0	0	0	0	0	0	0	0	0	0	0	0	0	0	0	0	0	0	0	0	0	0	0	0	0	0	0	0	0	0
ASV187	0	0	0	0	0	0	0	0	0	0	0	0	0	0	0	0	0	0	0	18	0	0	0	0	0	0	0	0	0	0	0	0	0	0	0	0	0	0	0	0	0	0	0	0	0	0	0	0	0
ASV188	0	0	0	0	0	0	0	0	0	0	0	0	0	0	0	0	0	0	0	0	0	0	0	0	0	0	1334	0	0	0	0	0	0	0	0	0	0	0	0	0	0	0	0	0	0	0	0	0	0
ASV189	0	0	0	0	0	0	0	0	0	0	0	0	0	0	0	0	0	0	0	0	0	0	0	0	0	0	0	0	0	0	0	0	0	0	0	0	0	0	0	0	0	0	0	0	0	0	0	0	0
ASV190	0	0	0	0	0	0	0	0	0	0	0	0	0	0	0	0	0	0	0	0	0	0	0	0	0	0	0	0	0	0	0	0	0	0	0	0	0	0	0	0	0	0	0	0	0	0	0	0	0
ASV191	0	0	0	0	0	0	0	0	0	0	0	0	0	0	0	0	0	0	0	0	0	0	0	0	0	0	0	0	0	0	0	0	0	0	0	6	0	7	3	3	0	0	0	0	0	0	0	0	17
ASV192	0	0	16	0	13	0	0	42	0	0	10	57	0	0	38	0	0	0	0	0	0	5	13	4	12	0	0	4	0	0	0	0	0	0	0	0	0	0	0	0	9	0	0	0	0	0	0	0	0
ASV193	0	0	0	0	0	0	0	0	0	0	0	0	0	0	0	0	0	0	0	0	0	0	0	0	0	0	354	0	0	0	0	0	0	0	0	0	0	0	0	0	0	0	0	0	0	0	0	0	0
ASV194	0	0	0	0	0	0	0	0	0	0	0	0	0	0	0	0	0	0	0	0	0	0	0	0	0	0	0	0	0	0	0	0	0	2	0	0	0	0	0	34	2	0	0	0	0	0	0	0	0
ASV195	0	0	22	0	0	0	0	0	0	0	0	0	0	0	0	0	0	0	0	0	0	0	0	0	0	0	0	0	0	0	0	0	0	0	0	0	0	0	0	0	0	0	0	0	0	0	0	0	0
ASV196	0	0	0	0	0	0	0	34	26	0	0	0	0	0	0	60	4	0	0	0	0	0	0	0	0	0	62	0	31	198	0	0	0	0	0	185	37	0	93	57	0	0	0	0	0	33	0	38	62
ASV197	0	0	0	0	0	0	219	0	0	0	0	0	0	0	0	21	0	0	0	0	0	0	0	0	0	0	39	6	0	0	0	0	0	0	0	0	0	0	0	0	0	0	0	0	0	0	0	0	0
ASV198	0	0	0	0	0	0	0	0	0	0	0	0	0	0	0	0	0	0	0	0	0	0	0	0	0	0	0	0	4	0	0	0	0	0	0	0	0	0	0	0	0	0	0	0	0	0	0	0	0
ASV199	0	0	0	0	0	0	0	0	0	0	0	26	0	0	0	0	0	0	0	0	0	0	0	0	0	0	10	0	0	0	0	0	0	0	0	0	0	0	0	0	0	0	0	0	0	0	0	0	0
ASV200	0	0	0	0	0	0	0	0	0	0	0	0	0	0	0	0	0	0	0	0	0	0	0	0	0	0	0	0	0	0	0	0	0	0	0	0	0	0	0	0	0	0	0	0	0	0	0	0	0
ASV201	0	0	0	0	0	0	0	0	0	0	0	0	0	0	0	0	0	0	0	0	0	0	0	0	0	0	0	0	0	0	0	0	0	0	0	0	0	0	0	0	0	0	0	72	0	0	0	0	0
ASV202	0	10	0	0	0	0	0	0	0	0	0	0	0	0	0	0	0	0	0	0	0	0	0	0	0	0	0	0	0	0	0	0	0	0	0	0	0	0	0	0	0	0	0	0	0	0	0	0	0
ASV203	0	0	0	0	0	0	0	0	0	0	0	16	0	0	0	0	0	0	0	0	0	0	0	0	0	0	0	0	0	0	0	0	0	0	0	0	0	0	0	0	0	0	0	0	0	0	0	0	0
ASV204	0	0	0	0	0	0	0	0	0	0	0	0	0	0	0	0	0	0	0	0	0	0	0	0	0	0	0	0	0	0	0	0	0	0	0	0	0	0	0	0	0	0	0	0	0	0	0	0	0
ASV205	0	6	0	0	0	0	53	0	0	0	0	0	0	0	0	0	0	0	0	0	0	0	0	0	0	0	0	5	0	0	0	0	0	0	0	0	9	0	0	2	0	0	0	2	0	0	0	0	0
ASV206	0	0	0	0	0	0	0	0	0	0	0	2	0	0	0	0	0	0	0	0	0	0	0	0	0	0	0	0	0	0	0	0	0	0	0	0	0	0	0	0	0	0	0	0	0	0	0	0	0
ASV207	0	0	0	0	0	0	0	0	6	0	0	0	0	0	0	0	0	0	0	0	0	0	0	0	0	0	0	0	0	0	0	0	0	0	0	0	0	0	0	0	0	0	0	0	0	0	0	0	0
ASV208	0	0	0	0	0	0	0	0	0	0	0	0	0	0	0	0	0	0	67	0	0	0	0	0	0	0	0	0	0	0	0	0	0	0	0	0	34	0	0	0	0	0	0	0	0	0	60	0	0
ASV209	0	0	0	0	0	0	0	0	0	0	0	0	0	0	0	0	0	0	0	4	0	0	0	0	0	0	0	0	0	0	0	0	0	0	0	0	0	0	0	0	0	0	0	0	0	0	0	0	0
ASV210	0	0	0	0	0	0	0	0	6	0	0	0	0	0	0	0	0	0	0	0	0	0	0	0	0	0	0	0	0	0	0	0	0	0	0	0	0	0	0	0	0	0	0	0	0	0	0	0	0
ASV211	68	0	0	0	0	0	0	0	0	0	0	0	0	0	0	0	0	0	0	0	0	0	0	0	0	0	0	0	0	0	0	0	0	0	0	0	0	0	0	0	0	0	0	0	0	0	0	0	0
ASV212	0	0	0	0	0	0	0	0	0	0	0	67	0	0	0	0	0	0	0	0	0	0	0	0	0	0	0	0	0	0	0	0	0	0	0	0	0	0	0	0	0	0	0	0	0	0	0	0	0
ASV213	0	0	0	0	0	0	0	0	52	0	0	0	0	0	0	0	0	30	53	22	0	0	0	0	0	0	0	0	0	0	0	0	0	0	0	91	0	38	0	50	0	0	0	0	0	0	0	0	0
ASV214	0	0	0	0	11	0	0	0	0	0	0	0	0	0	0	0	0	0	0	0	0	0	3	0	0	0	8	0	0	0	0	0	0	0	7	0	0	0	0	0	0	0	0	0	7	0	0	0	0
ASV215	0	0	0	0	0	0	0	36	0	0	0	0	0	0	0	0	0	0	0	0	0	0	0	0	0	0	0	0	0	0	0	0	0	0	0	0	0	0	0	0	0	0	0	0	0	0	0	0	0
ASV216	0	0	0	0	0	0	0	0	0	0	0	0	0	0	0	0	0	0	0	0	0	0	0	0	0	0	0	0	0	0	0	0	0	0	0	0	0	0	0	0	0	0	0	0	0	0	0	0	0
ASV217	0	0	0	0	6	0	142	0	0	300	0	0	0	0	0	0	0	0	0	0	0	0	0	0	0	0	0	0	0	0	0	0	0	0	0	0	0	0	0	0	0	0	0	0	0	0	0	0	0
ASV218	0	0	0	0	0	0	10	0	0	0	0	0	0	0	0	0	0	0	0	0	0	0	0	0	0	0	0	0	0	0	0	0	0	0	0	0	0	0	0	0	0	0	0	0	0	0	0	0	0
ASV219	0	0	0	0	0	0	0	0	0	0	0	0	0	0	0	0	0	0	0	0	0	0	0	0	0	0	0	5	0	0	0	0	0	0	0	0	0	0	0	0	0	0	0	0	0	0	0	0	0
ASV220	0	0	0	0	0	0	0	0	0	0	0	0	0	0	0	0	0	0	0	0	0	0	0	0	0	0	0	0	0	0	0	0	0	0	0	0	0	0	0	0	0	0	0	0	0	0	0	0	0
ASV221	0	0	0	0	0	0	0	0	0	0	0	0	0	0	0	0	0	0	0	0	0	0	0	0	0	0	6	0	0	0	0	0	0	0	0	0	0	0	0	0	0	0	0	0	0	0	0	0	0
ASV222	0	0	0	0	0	0	0	0	0	0	0	0	0	0	0	0	0	0	0	0	0	0	0	0	0	0	0	0	0	0	0	0	0	0	0	9	0	0	0	0	0	0	0	0	0	0	0	0	0
ASV223	0	0	0	0	0	0	0	0	229	0	0	0	0	0	0	0	0	0	0	0	0	0	0	0	0	0	0	0	0	0	0	0	0	0	0	0	0	0	0	0	0	0	0	0	0	0	0	0	0
ASV224	0	0	0	0	0	0	0	0	0	0	0	0	0	0	0	0	0	0	0	0	0	0	49	0	0	0	0	0	0	0	0	0	0	0	0	0	0	0	0	0	0	0	0	0	0	0	0	0	0
ASV225	0	0	0	0	0	0	0	0	0	0	0	0	0	0	0	0	0	0	0	14	0	0	0	0	0	0	0	0	0	0	0	0	0	0	0	0	0	0	4	0	0	0	0	0	0	0	0	0	0
ASV226	0	0	0	0	0	0	0	0	0	0	0	0	0	0	0	0	0	0	0	0	0	58	39	0	55	728	10	0	0	0	0	7	0	0	0	2037	0	0	18	0	0	0	4	25	11	0	3	0	5
ASV227	0	0	7	155	54	0	0	0	0	0	0	0	47	25	40	0	0	0	0	0	17	15	22	0	367	18	341	249	0	66	0	0	0	0	0	0	0	0	0	0	0	0	0	0	0	0	0	0	0
ASV228	0	0	0	0	0	0	0	0	0	0	49	181	0	0	27	0	0	0	0	0	0	0	0	46	33	0	0	0	0	0	0	0	0	0	0	0	0	0	0	0	0	0	0	0	0	0	0	0	0
ASV229	0	0	0	0	0	0	0	0	0	0	0	0	0	0	0	0	0	0	0	0	0	0	0	0	0	0	0	0	0	0	0	0	0	0	0	0	0	0	0	0	0	0	0	2	0	0	0	0	0
ASV230	0	0	0	0	0	0	0	0	0	0	0	0	0	0	0	0	0	0	0	0	0	2	0	0	0	0	0	0	0	0	0	0	0	0	0	0	0	0	0	0	0	0	0	0	0	0	0	0	0
ASV231	0	0	0	0	0	0	0	0	0	0	0	38	0	0	2	0	0	0	0	0	0	0	151	20	20	0	0	0	0	0	4	0	0	0	0	0	0	0	0	0	0	0	0	0	0	0	0	0	0
ASV232	0	0	0	0	0	0	0	0	0	0	0	0	0	0	0	0	0	0	0	0	0	0	0	0	0	0	0	0	0	0	0	0	0	0	0	0	0	0	0	0	0	0	0	0	0	0	0	0	0
ASV233	0	0	0	0	0	0	0	0	0	0	0	0	0	0	0	0	0	0	0	0	15	9	87	142	47	0	0	0	0	0	6	9	0	22	12	0	0	0	0	0	0	3	5	0	18	0	0	0	0
ASV234	0	0	0	0	0	0	0	0	0	0	0	0	0	0	0	0	0	0	0	0	0	0	0	0	0	0	0	0	0	0	401	0	239	619	0	0	0	0	0	0	1013	108	910	0	89	0	0	0	0
ASV235	0	0	0	0	0	0	0	14	0	0	0	0	0	0	0	0	0	0	0	0	0	0	0	0	0	0	0	0	0	0	0	0	0	0	0	0	0	0	0	0	0	0	0	0	0	0	0	0	0
ASV236	0	0	0	0	0	0	0	0	0	0	0	0	0	0	0	0	0	0	0	0	0	0	0	0	0	0	0	0	0	0	0	0	0	0	0	0	0	0	0	0	0	0	0	0	0	0	0	0	0
ASV237	0	0	0	0	0	0	0	0	0	0	0	0	0	0	0	0	0	0	0	0	0	0	0	0	0	0	0	0	0	0	0	0	0	0	0	0	0	0	0	0	0	0	0	4	0	0	0	0	0
ASV238	0	0	26	188	94	0	0	0	0	0	0	0	0	716	29	0	0	0	0	0	7	0	0	0	0	0	0	0	0	0	68	0	0	32	0	0	0	0	7	0	0	0	0	0	3	0	0	0	0
ASV239	0	0	0	0	0	137	0	0	0	0	0	0	0	0	0	0	0	0	0	0	0	0	0	0	0	0	0	0	0	0	0	0	0	0	0	0	0	0	0	0	0	0	0	0	0	0	0	0	0
ASV240	0	0	0	0	0	0	0	0	0	0	0	0	0	0	2	0	0	0	0	0	0	0	0	0	0	0	0	0	0	0	0	0	0	0	0	0	0	0	0	0	0	0	0	0	0	0	0	0	0
ASV241	0	0	0	0	0	0	21	0	0	0	0	0	0	0	0	0	0	0	0	0	0	0	0	0	0	0	31	0	0	0	0	0	0	0	0	0	0	0	4	0	0	0	0	0	0	0	0	0	0
ASV242	0	0	0	0	0	0	0	0	0	0	0	0	0	0	0	0	0	0	0	0	0	0	0	0	0	0	0	0	0	0	0	0	0	0	0	0	0	0	0	0	0	0	0	0	0	0	0	0	0
ASV243	0	0	0	0	0	0	0	0	0	0	0	0	0	0	0	0	0	0	0	0	0	0	0	0	0	0	0	0	9	0	0	0	0	0	0	73	0	0	0	7	0	0	0	0	0	0	0	0	22
ASV244	0	0	0	0	0	0	0	0	0	0	0	0	0	0	0	0	0	0	0	0	0	0	8	0	0	0	0	0	0	0	0	0	0	0	0	0	0	0	0	0	0	0	0	0	0	0	0	0	0
ASV245	0	0	0	0	0	0	0	0	0	0	0	0	0	0	0	0	0	0	0	0	0	21	0	0	0	0	0	0	0	0	0	0	0	0	0	0	0	0	0	0	0	0	0	0	0	0	0	0	0
ASV246	0	0	0	0	0	0	0	0	0	0	0	0	0	0	0	0	0	0	0	0	0	0	0	0	0	0	0	0	0	0	0	0	0	0	0	0	0	0	0	4	0	0	0	0	0	0	0	0	0
ASV247	0	0	0	0	0	0	0	0	0	0	0	0	0	0	0	0	0	0	0	0	0	0	0	0	0	0	0	0	0	0	0	0	0	0	0	0	0	0	0	119	0	0	0	0	0	0	0	0	0
ASV248	0	0	0	0	0	0	0	0	0	0	0	0	0	0	0	0	0	0	0	0	0	0	0	0	0	0	0	0	0	0	0	0	0	0	0	0	0	0	0	0	0	0	0	0	0	0	0	0	0
ASV249	0	0	0	0	0	135	0	0	0	0	0	69	0	0	15	0	0	0	0	0	0	430	0	2010	0	0	51	0	0	0	1207	0	34	349	10677	0	0	0	0	0	232	177	771	117	5024	0	0	0	0
ASV250	0	0	0	0	0	0	76	0	0	0	0	0	0	0	0	0	0	0	0	0	0	0	0	0	0	0	63	10	0	0	0	0	0	0	0	0	0	0	0	0	0	0	0	0	0	0	0	0	0
ASV251	0	0	2220	0	0	0	0	0	0	0	401	452	0	2251	3321	0	0	0	0	0	807	0	0	0	0	0	0	0	0	0	550	0	0	0	0	0	0	0	0	0	596	0	0	0	0	0	0	0	0
ASV252	0	0	0	0	0	0	0	50	0	0	0	0	0	0	0	0	0	0	0	0	0	0	0	0	0	0	0	0	0	0	0	0	0	0	0	0	0	0	0	0	0	0	0	0	0	0	0	0	0
ASV253	0	0	0	0	0	0	0	0	0	0	0	0	0	0	0	0	0	0	0	0	6	0	9	0	97	42	0	0	0	0	0	0	0	0	0	299	0	0	16	0	0	0	0	0	0	0	0	0	0
ASV254	0	0	0	0	45	0	0	0	0	0	0	0	0	0	0	0	0	0	0	0	0	0	0	0	0	0	0	0	0	0	0	0	0	0	0	0	0	0	0	0	0	0	2	0	0	0	0	0	0
ASV255	0	0	0	0	0	0	0	0	0	0	0	0	0	0	0	0	0	0	0	0	0	0	0	0	2	0	6	0	0	0	0	0	0	0	0	0	0	0	0	0	0	0	0	0	0	0	0	0	4
ASV256	0	0	0	0	0	0	0	0	0	0	0	0	0	0	0	0	0	0	0	0	0	0	0	0	0	0	0	0	0	0	0	0	0	0	0	7	0	0	0	0	0	0	0	0	0	0	0	0	0
ASV257	0	0	0	0	0	0	0	0	0	0	0	0	0	0	0	0	0	0	0	0	0	0	0	0	0	8	0	0	0	0	0	0	0	0	0	0	0	0	0	0	0	0	0	0	0	0	0	0	0
ASV258	0	0	0	0	0	0	0	0	0	0	0	0	0	0	0	0	0	0	0	0	0	0	0	0	0	0	0	0	0	0	0	0	0	0	0	0	0	0	0	0	0	0	0	0	0	0	0	0	0
ASV259	0	0	0	19	0	0	0	0	0	0	0	0	0	8	0	0	0	0	0	0	0	0	0	0	0	0	0	0	0	0	0	0	0	0	0	0	0	0	0	0	0	0	0	0	0	0	0	0	0
ASV260	0	0	0	0	0	0	0	0	0	0	0	0	0	0	0	0	0	0	0	0	0	0	0	0	0	0	0	0	0	0	0	0	0	0	0	0	0	0	0	0	0	0	0	0	0	0	0	0	0
ASV261	0	0	0	0	0	0	0	0	95	0	0	0	0	0	0	0	0	0	0	0	0	0	0	0	0	0	0	0	0	0	0	0	0	0	0	0	0	0	0	0	0	0	0	0	0	0	0	0	0
ASV262	404	0	0	0	0	0	0	0	0	0	0	0	0	0	0	0	0	0	0	0	0	0	0	0	0	0	0	0	0	0	0	0	0	0	0	0	0	0	0	0	0	0	0	0	0	0	0	0	0
ASV263	0	11	9	0	0	0	0	0	7	0	10	8	0	44	42	0	0	0	0	0	0	0	0	0	0	0	0	0	0	0	0	0	0	0	0	0	0	0	0	0	0	0	0	0	0	0	0	0	0
ASV264	0	0	0	0	0	0	0	17	0	0	0	0	0	0	0	0	0	0	0	0	0	0	0	0	0	0	0	0	0	0	0	0	0	0	0	0	0	0	0	0	0	0	0	0	0	0	0	0	0
ASV265	0	0	0	0	0	0	0	0	0	0	0	0	0	0	0	0	0	0	0	0	0	0	0	0	0	17	0	0	0	0	0	0	0	0	0	156	0	0	0	0	0	0	0	0	0	0	0	0	0
ASV266	0	11	0	0	0	0	0	0	0	0	0	0	0	0	0	0	0	0	0	0	0	0	0	0	0	0	0	0	0	0	0	0	0	0	0	0	0	0	0	0	0	0	0	0	0	0	0	0	0
ASV267	0	0	0	0	0	0	0	0	0	0	0	0	0	0	0	0	0	0	0	0	0	0	0	0	0	0	0	0	0	0	0	0	0	0	0	0	0	0	0	0	0	0	0	0	0	0	0	0	0
ASV268	1618	1489	529	629	746	4213	1259	4604	15328	2742	543	1033	2324	262	1761	1765	1703	4380	6587	4041	430	2337	1446	3187	3415	3343	1988	2206	2182	2134	2260	491	1058	1072	1526	9464	204	860	1708	648	21	1077	598	2227	735	705	1517	3355	1286
ASV269	0	0	18	0	0	0	0	28	0	0	28	30	108	0	0	0	0	0	0	0	0	0	184	0	0	0	0	0	0	0	0	0	0	0	0	0	0	0	0	0	0	0	0	0	0	0	0	0	0
ASV270	0	0	0	0	0	0	0	0	0	0	0	0	0	0	0	0	0	0	8	12	13	18	0	0	0	7	0	0	0	0	0	8	0	0	0	123	0	0	0	0	0	6	0	14	0	0	0	0	0
ASV271	0	0	0	0	0	0	0	0	0	0	0	0	0	0	0	0	0	0	0	0	0	0	0	0	0	10	0	0	0	0	0	0	0	0	0	0	0	0	0	15	0	0	0	0	0	0	0	0	0
ASV272	0	0	0	0	0	0	0	0	0	0	0	0	0	0	0	0	0	0	0	0	0	0	0	0	0	0	0	0	0	0	0	0	0	0	0	0	0	0	0	0	0	0	0	0	0	0	0	0	0
ASV273	0	0	0	0	0	0	0	0	0	0	0	0	0	0	0	2	74	0	0	0	0	0	0	0	0	0	0	0	0	0	0	0	0	0	0	0	0	0	0	0	0	0	0	0	0	0	0	0	0
ASV274	0	0	0	0	0	0	0	0	0	0	138	277	0	0	0	0	0	0	0	8	0	0	0	0	0	0	0	0	0	0	0	0	0	0	0	0	0	0	0	0	0	0	0	0	0	0	0	0	0
ASV275	0	0	0	0	0	0	0	0	0	0	0	0	67	0	0	0	0	0	0	0	0	0	0	0	0	0	0	0	0	0	0	0	0	0	0	0	0	0	0	0	0	0	0	0	0	0	0	0	0
ASV276	0	109	0	0	0	0	0	0	0	0	0	0	0	0	0	0	0	0	0	0	0	0	0	0	0	0	9	0	0	0	0	0	0	0	0	0	0	0	0	0	0	0	0	0	0	0	0	0	0
ASV277	0	0	0	0	0	0	0	0	0	0	0	0	0	0	0	0	0	0	0	0	0	0	4	0	0	0	0	0	0	0	0	0	0	0	0	0	0	0	0	0	0	0	0	0	0	0	0	0	0
ASV278	0	0	0	0	0	0	0	0	0	0	0	0	0	0	0	0	0	0	0	0	0	0	0	0	0	0	0	0	0	0	0	0	0	0	0	0	0	0	0	0	0	0	0	0	0	0	0	0	0
ASV279	0	0	0	0	0	0	0	7	0	34	0	0	0	0	0	0	0	41	0	0	0	134	0	0	0	0	0	0	0	0	0	0	0	0	0	0	0	0	0	0	0	0	4	0	0	0	0	0	0
ASV280	0	0	0	0	0	0	0	0	0	0	0	0	0	0	0	0	0	0	0	0	0	0	36	0	0	0	0	0	0	0	0	0	0	0	0	0	0	0	0	0	0	0	0	0	0	0	0	0	0
ASV281	0	0	0	0	0	0	0	0	0	0	0	0	0	0	0	0	0	0	0	0	0	0	0	0	0	0	0	0	0	0	0	0	0	0	0	0	0	0	0	2	0	0	0	0	0	0	0	0	0
ASV282	1062	455	36	0	0	0	0	0	0	0	0	0	58	0	0	0	0	0	0	0	0	0	0	0	0	0	0	716	0	0	0	0	0	0	0	0	0	0	0	0	0	0	0	0	0	0	0	0	0
ASV283	0	0	0	0	0	0	0	0	0	0	0	0	0	0	0	0	0	757	119	192	0	0	0	0	0	0	0	0	0	0	0	0	0	0	0	0	0	0	0	0	0	0	0	0	0	0	0	0	0
ASV284	0	0	0	0	0	0	0	0	0	0	0	0	0	0	0	0	0	0	0	0	0	6	0	0	0	0	0	0	0	0	2	0	0	0	0	0	0	0	0	0	0	0	0	0	0	0	0	0	0
ASV285	0	0	0	0	0	0	0	0	0	0	0	0	0	0	0	0	0	0	0	0	0	74	0	0	0	0	0	0	0	0	0	13	0	0	0	8	0	0	0	0	0	0	6	14	7	0	0	0	0
ASV286	0	0	0	0	0	0	0	201	0	0	0	0	0	0	0	0	0	0	0	0	0	0	0	0	0	0	0	0	0	0	0	0	0	0	0	0	0	0	0	0	0	0	0	0	0	0	0	0	0
ASV287	0	0	0	0	0	0	0	0	0	0	0	0	0	0	0	0	0	0	0	0	0	0	0	0	0	0	0	0	0	0	0	0	0	0	0	0	0	0	0	0	3	0	0	0	0	0	0	0	0
ASV288	0	0	0	0	0	0	0	0	0	0	0	0	0	0	0	0	0	0	0	0	0	0	0	0	0	0	0	0	0	0	0	0	0	0	0	0	0	0	0	0	0	0	0	0	0	0	0	0	0
ASV289	0	0	0	0	0	0	0	52	0	0	0	0	0	0	0	0	0	0	0	0	0	0	0	0	0	0	0	0	0	0	0	0	0	0	0	0	0	0	0	0	0	0	0	0	0	0	0	0	0
ASV290	0	0	0	0	0	0	0	0	0	0	0	0	0	0	0	0	0	0	0	0	6	0	0	0	0	0	0	0	0	0	0	0	0	0	0	0	0	0	0	0	0	0	0	0	0	0	0	0	0
ASV291	0	0	7	0	0	0	0	0	66	0	21	0	148	0	28	0	0	0	0	0	0	11	12	72	51	0	12	0	16	0	0	0	0	0	0	0	0	0	0	0	0	0	0	0	0	0	0	0	0
ASV292	0	0	0	0	0	0	0	0	0	0	0	0	0	0	0	0	0	0	0	0	0	0	0	0	0	0	0	0	0	0	0	0	0	0	0	0	0	0	0	0	0	0	0	0	0	0	0	0	0
ASV293	0	0	0	0	0	0	0	0	0	0	0	0	0	0	0	0	0	0	0	0	0	0	0	0	0	0	0	0	0	0	0	0	0	0	0	0	0	0	0	0	0	0	0	0	0	0	0	0	0
ASV294	0	0	0	0	0	0	0	0	0	0	0	0	0	0	7	452	0	0	0	0	0	0	0	0	0	0	0	0	0	0	0	0	0	0	0	0	0	0	0	0	0	0	0	0	0	0	0	0	0
ASV295	0	0	0	2	0	0	0	0	0	0	0	0	0	0	0	11503	5575	4513	0	21305	35	0	0	0	0	0	0	0	9	0	338	324	11169	1590	0	226	9703	4925	10654	10587	14022	610	8762	0	1338	5030	5070	15986	4991
ASV296	0	0	0	0	0	0	0	0	0	0	0	0	0	0	0	0	0	0	0	0	0	0	0	0	0	0	0	0	0	94	0	0	0	0	0	0	0	0	0	0	0	0	0	0	0	0	0	0	0
ASV297	0	0	0	0	0	0	0	0	0	0	0	0	0	0	0	0	0	0	0	0	15	0	10	0	0	0	0	0	0	0	1	22	0	0	0	0	0	0	0	0	0	0	0	0	95	0	0	0	0
ASV298	0	0	0	0	11	0	0	1018	0	0	0	0	72	0	14	0	0	0	0	0	22	0	0	0	0	0	0	0	0	0	5	0	0	0	0	0	0	0	0	0	0	0	0	0	0	0	0	0	0
ASV299	0	0	0	0	0	0	0	0	0	0	0	0	0	0	0	0	0	0	0	0	0	0	0	0	0	0	0	0	0	0	0	0	0	0	0	0	0	0	0	0	0	0	0	0	0	0	0	0	2
ASV300	0	0	0	0	0	0	0	0	0	0	0	0	0	0	0	0	0	0	0	0	0	4	11	0	79	35	0	0	0	0	0	0	0	0	0	26	0	0	0	0	0	0	0	0	0	0	0	0	0
ASV301	0	0	0	0	0	0	0	0	0	0	20	70	0	0	0	0	0	0	0	0	0	0	0	0	0	0	0	0	0	0	0	0	0	0	0	0	0	0	0	0	0	0	0	0	0	0	0	0	0
ASV302	0	0	0	0	0	0	0	0	0	0	0	0	0	0	0	0	0	0	0	0	0	0	0	0	0	0	0	0	0	0	0	0	0	0	0	0	0	0	0	0	0	0	0	0	0	0	0	0	0
ASV303	0	0	0	0	0	0	0	95	0	0	0	0	0	0	0	0	0	0	0	0	0	0	0	0	0	0	0	0	0	0	0	0	0	0	0	0	0	0	0	0	0	0	0	0	0	0	0	0	0
ASV304	0	0	0	0	0	0	0	0	73	0	0	0	0	0	0	0	0	0	0	0	0	0	0	0	0	0	0	0	0	0	0	0	0	0	0	0	0	0	0	0	0	0	0	0	0	0	0	0	0
ASV305	0	0	0	0	0	41	0	0	0	0	0	0	0	0	0	0	0	0	0	0	0	0	0	0	0	0	0	0	0	0	0	0	0	0	0	0	0	0	0	0	0	0	0	0	0	0	0	0	0
ASV306	0	0	0	0	0	0	0	0	0	0	0	0	0	0	0	0	0	0	0	0	0	0	0	0	0	0	0	0	0	101	0	0	0	0	0	0	0	0	0	0	0	0	0	0	0	0	0	0	0
ASV307	0	0	0	0	0	0	0	0	268	0	7	0	4	0	24	0	0	59	0	0	6	6	6	5	2	0	0	0	0	0	0	0	0	0	0	0	0	0	0	0	0	0	6	0	0	0	0	0	0
ASV308	0	0	0	0	0	0	0	0	0	0	0	0	0	0	0	0	2	0	0	0	0	0	0	0	0	0	0	0	0	0	0	0	0	0	0	0	0	0	0	0	0	0	0	0	0	0	0	0	0
ASV309	0	0	0	0	0	0	0	0	0	0	0	0	0	0	0	0	0	0	0	0	0	0	0	0	0	0	0	0	0	0	0	0	0	0	0	35	9	0	0	0	0	0	0	0	0	0	0	0	0
ASV310	0	0	0	0	0	0	0	0	0	0	0	0	0	0	0	0	0	38	0	0	0	0	0	0	0	0	3	0	0	0	0	0	0	0	0	0	0	0	0	0	0	0	0	0	0	0	0	0	0
ASV311	0	0	0	0	0	0	0	0	0	0	0	0	0	0	0	0	0	13	0	0	0	0	0	0	0	0	0	0	0	0	0	0	0	0	0	0	0	0	0	0	0	0	0	0	0	0	0	0	0
ASV312	0	0	0	0	0	0	0	0	0	0	0	0	0	0	0	0	0	0	0	0	0	0	0	0	0	0	0	45	0	0	0	0	0	0	0	0	0	0	0	0	0	0	0	0	0	0	0	0	0
ASV313	0	0	0	0	0	0	10	0	0	0	0	0	0	0	0	0	0	0	0	0	0	0	0	0	0	0	0	0	0	0	0	0	0	0	0	0	0	0	0	0	0	0	0	0	0	0	0	0	0
ASV314	0	0	0	0	0	0	0	0	0	0	0	0	0	0	0	0	0	0	0	0	0	0	0	0	0	0	0	0	0	0	0	0	0	0	0	0	11	0	0	0	0	0	0	0	0	0	0	0	0
ASV315	0	0	0	0	0	0	0	0	0	0	0	0	0	0	0	0	0	0	0	0	0	0	0	0	0	0	0	0	0	0	0	0	0	0	0	0	0	0	0	0	0	0	0	0	0	0	0	0	0
ASV316	0	0	0	0	51	0	0	0	0	0	0	0	0	0	93	0	0	0	0	0	0	57	816	0	265	0	0	0	0	0	0	0	0	0	0	0	0	0	0	0	0	0	0	0	0	0	0	0	0
ASV317	0	0	0	0	0	0	0	0	0	0	0	0	0	0	0	0	0	0	0	0	0	0	0	0	0	0	0	0	0	0	0	0	0	0	0	16	0	0	0	0	0	0	0	0	0	0	0	0	0
ASV318	0	0	0	0	0	0	0	0	0	0	0	0	0	0	0	0	0	0	0	0	21	0	0	0	0	0	0	0	0	0	0	0	0	0	0	0	0	0	0	0	0	0	0	76	0	0	9	0	0
ASV319	0	0	0	0	0	0	0	0	0	0	0	0	0	0	0	0	0	0	0	0	0	0	0	0	0	0	0	0	0	0	0	0	0	0	0	0	0	16	0	0	0	0	0	0	0	0	9	13	0
ASV320	0	0	0	0	0	96	0	125	99	0	365	445	78	102	933	384	1825	1580	3685	701	0	0	0	0	669	357	718	62	4490	301	0	0	0	0	644	1732	137	1230	1534	222	3	0	0	0	0	830	1489	863	1023
ASV321	0	0	0	0	0	0	0	0	0	0	0	0	0	0	0	0	0	0	0	0	0	0	0	0	0	0	0	0	0	0	0	0	0	0	0	0	0	0	0	0	0	5	47	48	0	0	0	0	0
ASV322	0	0	0	0	0	0	0	0	0	0	0	0	0	0	0	0	0	0	3	0	0	8	0	0	0	0	0	0	0	0	0	4	0	0	0	33	0	0	0	0	0	0	21	0	27	0	12	0	0
ASV323	0	0	0	0	0	0	0	0	0	0	0	10	0	0	0	0	0	0	0	0	0	0	0	0	0	0	0	0	0	0	0	0	0	0	0	0	0	0	0	0	0	0	0	0	0	0	0	0	0
ASV324	0	0	0	0	0	0	0	0	0	0	0	0	0	0	0	0	48	0	0	0	0	0	0	0	0	0	0	0	0	0	0	0	0	0	0	0	0	0	0	0	0	0	0	0	0	0	0	0	0
ASV325	0	0	0	0	0	0	0	93	0	0	0	0	0	0	0	0	43	0	0	0	0	0	0	0	0	0	0	0	0	0	0	0	0	0	0	0	0	0	0	0	0	0	0	0	0	0	0	0	0
ASV326	0	0	0	0	0	0	0	0	0	0	0	0	0	0	0	0	0	0	0	0	0	0	0	0	0	0	0	0	0	0	0	0	0	0	0	0	0	0	0	0	0	0	0	0	0	0	0	0	0
ASV327	0	0	0	0	0	0	0	0	0	0	0	0	0	0	0	0	0	0	0	0	0	0	0	0	0	0	0	0	0	0	0	0	0	0	0	0	0	0	0	0	0	0	0	0	0	0	0	0	0
ASV328	0	0	0	0	0	0	0	0	0	0	0	0	0	0	0	0	0	0	0	0	0	0	0	0	0	0	286	0	0	0	0	0	3	0	0	0	0	0	0	0	0	0	0	0	0	0	0	0	0
ASV329	1455	214	252	132	8289	623	6413	2640	210	11	310	597	2256	567	544	11	0	276	2689	897	627	6023	331	1279	1905	119	4983	763	14	0	2206	1141	1896	2180	260	47	0	0	52	26	26	1427	3107	3724	1315	0	15	0	0
ASV330	0	0	0	0	0	0	0	0	0	0	0	0	1556	0	0	0	0	0	0	0	0	0	0	0	0	0	0	0	0	0	0	0	0	0	0	0	0	0	0	0	0	0	0	0	0	0	0	0	0
ASV331	0	0	0	0	0	0	0	0	0	0	0	0	0	0	0	0	0	0	0	44	0	0	0	0	0	0	0	0	0	0	0	0	0	0	0	0	0	0	0	0	0	0	0	0	0	0	0	0	0
ASV332	0	0	0	0	0	0	0	0	0	0	0	0	56	0	0	0	0	0	0	0	0	0	0	0	0	0	0	0	0	0	0	0	0	0	0	0	0	0	0	0	0	0	0	0	0	0	0	0	0
ASV333	2143	1212	0	0	161	0	0	0	0	0	0	0	41	0	211	0	0	0	0	0	0	0	0	0	0	0	0	0	0	0	0	0	0	0	0	0	0	0	0	0	0	0	0	0	0	0	0	0	0
ASV334	0	0	0	0	0	0	0	0	0	0	0	0	0	0	0	0	0	0	0	0	0	0	48	0	0	0	0	0	0	0	0	2	0	0	0	0	0	0	0	0	0	0	0	0	0	8	0	0	0
ASV335	0	0	0	0	0	95	1351	25	0	214	0	0	0	3	0	0	0	37	0	0	0	5	0	0	12	0	0	0	0	72	0	0	0	0	3	0	0	0	0	0	0	0	0	0	0	0	4	0	7
ASV336	0	0	0	0	0	0	0	0	0	0	0	0	0	0	0	0	0	0	0	0	0	0	0	0	0	0	13	0	0	0	0	0	0	0	0	0	0	0	0	0	0	0	0	0	0	0	0	0	0
ASV337	0	0	0	0	0	0	0	0	0	0	0	0	0	0	0	0	0	0	0	0	0	0	0	0	0	0	0	0	0	0	0	0	0	0	0	12	0	0	0	0	0	0	0	0	0	3	0	0	4
ASV338	0	0	0	0	0	0	0	0	0	0	0	0	0	0	0	0	0	0	0	0	0	0	0	0	4	0	0	0	4	451	0	0	0	0	0	0	0	0	0	3	0	0	0	0	0	0	0	0	0
ASV339	0	0	0	0	0	0	0	0	0	0	0	0	0	0	0	0	0	0	0	0	4	0	0	0	0	0	0	0	0	0	0	0	0	0	0	0	0	0	0	0	0	0	0	0	0	0	0	0	0
ASV340	0	0	5	0	0	0	0	0	0	0	0	0	0	0	0	0	0	0	0	0	0	0	0	0	0	0	0	0	0	0	0	0	0	0	0	0	0	0	0	0	0	0	0	0	0	0	0	0	0
ASV341	0	0	0	0	0	0	0	0	0	0	0	0	0	0	0	0	0	0	176	0	0	0	0	0	0	0	0	0	0	0	0	0	0	0	0	0	0	0	0	0	0	0	0	0	0	0	0	0	0
ASV342	0	0	0	0	0	0	0	0	0	0	26	42	0	0	0	0	0	0	0	0	0	0	0	0	0	0	0	0	0	0	0	0	0	0	0	0	0	0	0	0	0	0	0	0	0	0	0	0	0
ASV343	0	0	0	0	0	0	0	0	0	0	0	0	0	0	0	0	0	0	0	0	0	0	0	0	0	367	14	0	0	0	0	0	0	0	0	169	0	48	20	3	0	0	0	0	0	0	21	12	16
ASV344	0	0	0	0	0	0	0	17	0	0	0	0	0	0	0	0	0	0	0	0	0	0	0	0	0	0	0	0	0	0	0	0	0	0	0	0	0	0	0	0	0	0	0	0	0	0	0	0	0
ASV345	0	0	0	0	0	0	0	0	0	0	0	0	0	0	0	0	0	0	0	0	0	37	0	0	0	0	0	0	0	0	0	0	0	0	0	0	0	0	0	0	0	0	0	0	0	0	0	0	0
ASV346	0	20	0	0	0	0	0	0	0	0	0	0	0	0	0	0	0	0	0	0	0	0	0	0	0	0	0	0	0	0	0	0	0	0	0	0	0	0	0	0	0	0	0	0	0	0	0	0	0
ASV347	0	0	0	0	0	0	0	0	0	0	0	0	0	0	0	0	0	0	0	0	0	0	8	0	0	0	0	0	0	0	0	0	0	0	0	0	0	0	0	0	0	0	0	0	0	0	0	0	0
ASV348	0	0	0	0	0	0	0	0	0	0	0	0	0	0	0	0	0	0	58	0	0	0	0	0	0	0	0	0	0	0	0	0	0	0	0	0	0	0	0	0	0	0	0	0	0	0	0	0	0
ASV349	0	0	0	0	0	0	51	0	0	0	0	0	0	0	0	0	0	0	0	0	0	0	0	0	0	0	0	0	0	0	0	0	0	0	0	0	0	0	0	0	0	0	0	0	0	0	0	0	0
ASV350	0	0	0	0	0	37	0	0	0	42	0	0	0	0	14	17	0	62	47	14	112	648	161	95	27	340	403	0	272	0	256	132	157	338	758	1075	58	356	724	387	108	422	147	124	350	513	938	1839	463
ASV351	0	0	0	0	0	0	0	0	0	0	0	0	0	0	0	0	0	0	0	0	0	0	0	0	0	0	0	0	0	0	0	0	0	0	0	69	0	0	0	0	0	0	0	0	0	0	0	0	0
ASV352	0	0	0	0	0	0	0	0	0	0	0	0	0	0	0	0	0	0	0	0	0	0	0	0	0	0	0	0	0	0	0	0	0	0	0	18	0	0	0	0	0	0	0	0	0	0	0	0	0
ASV353	0	0	0	5	0	0	0	29	0	0	4	9	0	0	4	0	0	0	0	0	0	0	0	0	0	0	0	0	0	0	0	0	0	0	0	0	0	0	0	0	0	0	0	0	0	0	0	0	0
ASV354	0	0	0	0	0	0	0	0	0	0	0	0	0	0	0	0	0	0	0	0	0	0	0	0	0	0	0	0	0	0	0	0	0	0	0	0	0	0	0	0	0	0	0	0	0	0	0	0	0
ASV355	0	0	0	0	0	0	0	0	0	0	0	0	0	0	0	0	0	0	0	0	0	0	0	0	0	0	0	0	4	0	0	0	0	0	0	0	0	0	0	0	0	0	0	0	0	0	3	0	0
ASV356	0	0	0	0	21	0	0	0	0	0	0	0	0	0	0	0	0	0	0	0	0	0	0	0	0	8	0	0	0	0	0	0	0	0	0	0	0	0	0	0	0	0	0	0	0	0	0	0	0
ASV357	0	0	0	0	0	0	0	0	0	0	0	0	0	0	0	0	0	0	0	0	0	0	0	0	0	0	0	0	0	0	0	0	0	0	0	8	0	0	0	0	0	0	0	0	0	0	0	0	0
ASV358	0	56	0	42	7	7	3	635	518	0	0	0	7	23	83	79	0	169	183	35	24	30	43	84	59	2	11	5	81	0	30	23	8	0	85	83	16	8	14	7	0	10	26	0	32	69	178	26	0
ASV359	0	0	0	0	0	0	0	0	0	0	0	0	0	0	0	0	0	0	0	0	0	0	0	0	0	0	0	0	0	238	0	0	0	0	0	0	0	0	0	0	0	0	0	0	0	0	0	0	0
ASV360	0	0	0	0	0	0	0	13	0	0	0	0	0	0	0	0	0	0	0	0	0	0	0	0	0	0	0	0	0	0	0	0	0	0	0	0	0	0	0	0	0	0	0	0	0	0	0	0	0
ASV361	0	0	0	0	0	0	0	0	0	0	0	0	0	0	0	0	0	0	0	0	0	0	39	0	0	0	5	0	0	0	0	0	0	0	0	0	0	0	0	0	0	0	0	0	0	0	0	0	0
ASV362	0	20	0	0	0	0	0	76	0	0	0	0	0	0	0	0	0	0	0	0	3	6	0	0	0	0	0	0	0	0	0	0	0	0	0	0	0	0	0	0	0	0	0	0	0	0	0	0	0
ASV363	0	0	0	0	0	21	0	0	0	0	0	0	0	0	0	0	0	0	0	0	0	0	0	0	0	0	0	0	0	0	0	0	0	0	0	0	0	0	0	0	0	0	0	0	0	0	0	0	0
ASV364	0	0	0	0	0	0	0	0	0	0	0	0	0	0	0	0	0	0	0	0	0	0	0	0	0	0	5	0	0	0	0	0	0	0	0	0	0	0	0	0	0	0	0	0	0	0	0	0	0
ASV365	0	0	0	0	0	0	0	26	0	0	0	0	0	0	0	0	0	0	0	0	0	0	0	0	0	0	0	0	0	0	0	0	0	0	0	0	0	0	0	0	0	0	0	0	0	0	0	0	0
ASV366	110	0	0	0	0	0	0	0	0	0	0	0	0	0	0	0	0	0	0	0	0	0	0	0	0	0	0	0	0	0	0	0	0	0	0	0	0	0	0	0	0	0	0	0	0	0	0	0	0
ASV367	0	0	18	523	54	0	0	0	0	0	0	0	0	17	23	0	0	0	0	0	0	0	0	0	53	0	0	0	0	0	0	0	0	0	0	0	0	0	0	0	0	0	0	0	0	0	0	0	0
ASV368	0	0	56	11	0	0	0	0	0	0	88	223	1120	25	87	0	0	0	16	2	0	0	8	26	24	0	0	0	0	0	0	0	0	0	10	0	0	0	0	0	0	0	0	0	0	0	0	0	0
ASV369	0	0	0	0	0	0	0	0	0	0	0	0	0	0	0	0	59	0	0	0	0	0	0	0	0	0	0	0	0	0	0	0	0	0	0	0	0	0	0	0	0	0	0	0	0	0	0	0	0
ASV370	0	0	0	0	0	0	0	0	0	0	0	0	0	0	0	0	0	0	0	0	0	0	0	0	0	19	0	0	0	0	0	0	0	0	0	0	0	0	0	0	0	0	0	0	0	0	0	0	0
ASV371	0	0	29	0	0	0	0	0	0	0	56	54	27	0	127	0	0	0	0	0	0	0	0	96	0	0	0	0	0	0	0	0	0	0	154	0	0	0	0	0	0	0	0	0	56	0	0	0	0
ASV372	0	0	0	0	0	0	0	0	0	0	0	0	0	0	0	0	0	0	0	0	0	0	0	0	0	0	0	0	0	0	0	0	0	0	0	0	0	0	0	0	0	0	0	0	0	0	0	0	0
ASV373	0	0	0	0	0	0	0	0	0	0	0	0	0	0	0	0	63	0	0	0	0	0	0	0	0	0	0	0	0	0	0	0	0	0	0	0	0	0	0	0	0	0	0	0	0	0	0	0	0
ASV374	0	0	0	0	0	0	0	0	0	0	0	24	0	0	0	0	0	0	0	0	0	0	0	0	0	0	0	0	0	0	0	0	0	0	0	0	0	0	0	0	0	0	0	0	0	0	0	0	0
ASV375	0	0	0	0	0	0	0	0	0	0	0	0	0	0	0	0	2	0	0	0	0	0	0	10	3	0	0	0	0	0	0	0	0	0	0	0	0	0	0	0	0	0	0	0	0	0	0	0	0
ASV376	0	0	0	0	0	0	0	0	0	0	0	0	0	0	0	0	654	0	0	0	0	0	0	0	6	0	0	0	0	0	0	0	0	0	0	0	0	0	0	0	0	0	0	0	0	0	0	0	0
ASV377	964	0	0	0	0	0	0	0	0	0	8	0	0	0	0	0	0	0	0	6	4	0	0	0	0	0	0	0	0	0	0	0	0	0	0	0	0	0	0	0	0	0	0	0	0	0	0	0	0
ASV378	0	0	0	0	0	0	0	0	0	0	0	0	0	0	0	0	0	0	0	0	0	0	0	0	0	0	0	0	0	0	0	0	0	0	0	0	0	0	0	0	0	0	0	0	0	0	0	0	0
ASV379	0	0	0	0	0	0	0	0	0	0	0	0	0	0	0	0	0	0	0	0	0	3	0	0	0	0	10	0	0	0	0	0	0	0	0	41	0	155	3	4	0	0	0	0	0	136	9	9	88
ASV380	0	0	0	0	0	0	0	0	0	0	0	0	0	0	0	0	0	0	0	0	0	0	0	0	0	0	0	0	0	0	0	0	0	0	0	0	0	0	0	0	0	0	0	0	0	0	0	0	0
ASV381	0	0	0	0	0	0	0	0	0	211	0	0	0	0	0	0	0	0	0	0	0	0	0	0	0	0	0	0	0	0	0	0	0	0	0	0	0	0	0	0	0	0	0	0	0	0	0	0	0
ASV382	0	0	0	0	0	0	0	0	0	0	0	0	0	0	0	0	0	0	119	32	0	10	0	10	0	9	0	0	57	48	21	0	15	15	12	28	6	22	82	15	0	8	50	0	10	94	67	18	28
ASV383	0	0	0	0	0	0	0	0	0	0	0	0	0	0	0	0	0	0	0	5	0	0	0	0	0	0	2	0	0	0	0	0	0	0	0	8	0	0	0	0	0	0	0	0	0	0	0	0	0
ASV384	0	0	0	0	0	0	0	0	0	0	0	0	0	0	0	0	0	0	0	0	134	164	157	570	248	0	0	0	0	0	0	64	63	156	261	0	0	0	0	0	0	79	97	0	233	0	0	0	0
ASV385	0	0	0	0	0	0	0	0	0	0	0	0	0	0	0	0	277	0	0	0	0	0	0	0	0	0	0	0	0	0	0	0	0	0	0	0	0	0	0	0	0	0	0	0	0	0	0	0	0
ASV386	0	0	0	0	0	0	0	0	0	0	0	0	0	0	0	0	0	0	0	0	0	0	0	2	0	0	0	0	0	0	0	0	0	0	0	0	0	0	0	0	0	0	0	0	0	0	0	0	0
ASV387	0	0	0	0	0	0	0	0	0	0	0	0	0	0	11	0	119	0	0	0	0	0	0	0	0	0	0	0	0	0	0	0	0	0	0	0	0	0	0	0	0	0	0	0	0	0	0	0	0
ASV388	0	0	0	0	0	0	0	0	0	0	0	0	0	0	0	0	0	0	0	0	0	0	0	0	0	0	0	0	0	0	0	0	0	0	0	0	0	0	0	0	0	0	0	0	0	0	0	0	0
ASV389	0	0	0	0	0	0	0	108	0	0	0	0	0	0	0	0	0	0	0	0	11	4	7	0	0	0	5	0	0	0	0	0	0	0	0	0	0	0	0	0	0	0	0	0	0	0	0	0	0
ASV390	0	0	0	0	0	0	0	0	0	0	0	0	0	0	0	0	0	0	0	0	0	0	26	28	11	0	0	0	0	0	0	0	0	0	0	0	0	0	0	0	0	0	35	0	0	0	0	0	0
ASV391	0	0	0	0	0	0	0	0	0	0	0	0	0	0	0	0	0	0	0	30	0	0	0	0	0	0	0	0	0	0	0	0	0	0	0	0	0	0	0	0	0	0	0	0	0	0	0	0	0
ASV392	0	0	0	0	0	0	0	0	0	0	0	0	0	0	0	0	0	0	0	0	0	0	3	0	0	0	0	0	0	0	0	0	0	0	0	14	0	0	0	0	0	0	0	2	0	0	0	0	6
ASV393	91	0	8	0	0	0	0	0	7	0	28	52	316	6	51	0	0	0	0	0	47	0	145	232	100	6	0	0	0	0	0	27	3	35	19	26	0	9	0	0	3	38	0	0	58	28	6	0	64
ASV394	0	0	0	0	0	0	0	0	0	0	0	0	0	0	4	0	0	0	0	0	0	0	0	0	0	0	0	0	0	0	0	0	0	0	0	0	0	0	0	0	0	0	0	0	0	0	0	0	0
ASV395	0	0	0	0	0	0	0	139	0	0	0	0	0	0	0	0	0	38	0	0	0	0	0	0	0	0	0	0	0	0	0	0	0	0	0	0	0	0	0	0	0	0	0	0	0	0	0	0	0
ASV396	0	0	0	0	0	0	0	0	0	0	0	0	0	0	0	0	0	0	0	25	0	0	0	0	0	0	0	0	0	0	0	0	0	0	0	0	0	0	0	0	0	0	0	0	0	0	0	0	0
ASV397	0	0	0	0	0	0	0	0	0	0	0	0	0	0	0	0	0	0	0	0	0	0	6	0	0	0	0	0	0	0	0	0	0	0	0	0	0	0	0	0	0	0	0	0	0	0	0	0	0
ASV398	0	0	0	14	0	0	0	0	11	146	0	11	0	0	0	19	0	0	46	0	0	0	0	0	0	0	11	0	0	0	0	0	0	0	0	0	0	2	0	0	2	0	0	5	0	0	0	0	0
ASV399	0	0	0	0	0	0	0	0	0	0	0	0	0	0	0	0	0	0	0	0	0	0	0	0	0	0	0	0	0	0	0	0	0	0	0	0	0	0	0	0	0	0	0	0	0	0	0	0	0
ASV400	0	0	0	0	0	0	0	0	0	0	0	0	0	0	0	0	0	0	0	0	0	0	0	0	0	2	0	0	0	0	0	0	0	0	0	0	0	0	0	0	0	0	0	0	0	0	0	0	0
ASV401	0	0	0	0	0	0	0	0	0	0	0	0	0	0	0	0	0	0	0	0	0	0	0	0	0	0	0	0	0	0	0	0	0	0	0	0	0	0	0	15	0	0	0	0	0	0	0	0	0
ASV402	0	0	0	0	0	0	0	0	0	0	0	0	0	0	0	0	0	0	0	0	0	0	0	0	0	0	0	0	0	72	0	0	0	0	0	0	0	0	0	0	0	0	0	0	0	0	0	0	0
ASV403	0	0	0	0	0	0	0	0	96	0	0	0	0	0	0	0	0	0	0	0	0	0	0	0	0	0	0	0	0	0	0	0	0	0	0	0	0	0	0	0	0	0	0	0	0	0	0	0	0
ASV404	0	0	0	0	0	1623	0	0	0	0	0	0	0	0	0	0	0	0	0	0	0	0	0	0	0	0	0	0	0	0	0	0	0	0	0	0	0	0	0	0	0	0	0	0	0	0	0	0	0
ASV405	0	0	0	0	0	0	0	0	0	0	64	381	0	0	0	0	0	0	0	0	0	0	0	0	0	0	4	0	0	0	0	0	0	0	0	0	0	0	0	0	0	0	0	0	0	0	0	0	0
ASV406	0	0	0	0	0	0	0	0	0	0	0	0	0	0	0	0	0	0	0	0	0	0	0	0	0	0	0	0	0	0	0	0	0	0	0	0	0	0	0	0	0	0	0	0	0	0	0	0	0
ASV407	0	0	0	0	0	0	0	0	0	0	0	0	0	0	0	0	0	0	0	0	207	0	233	0	0	0	0	0	0	0	0	0	449	177	0	0	0	0	0	0	2665	318	511	476	153	0	0	0	0
ASV408	4	0	0	0	0	0	0	0	0	0	0	0	0	0	0	0	0	0	0	0	0	0	0	0	0	0	0	0	0	0	0	0	0	0	0	0	0	0	0	0	0	0	0	0	0	0	0	0	0
ASV409	0	0	11	0	9	0	0	0	0	0	0	0	0	0	0	0	0	0	0	0	0	0	0	0	0	0	0	0	0	0	0	0	0	0	0	0	0	0	0	0	0	0	0	0	0	0	0	0	0
ASV410	0	20	327	0	12	0	0	46	131	0	218	931	1288	37	280	39	0	0	0	0	39	230	274	2554	287	0	255	0	11	0	45	31	10	96	318	10	0	0	0	0	7	32	19	9	88	0	0	0	0
ASV411	0	0	0	0	0	0	0	0	0	0	0	0	0	0	0	0	0	0	0	0	0	0	0	0	0	0	0	0	0	0	0	0	0	0	0	0	0	0	0	0	0	0	0	0	0	0	0	0	0
ASV412	0	0	0	0	0	0	0	0	0	0	0	0	0	0	0	0	0	0	0	0	0	0	0	0	0	0	0	0	0	89	0	0	0	0	0	0	0	0	0	0	0	0	0	0	0	0	0	0	0
ASV413	0	0	0	0	0	0	0	0	9	0	0	0	0	0	0	0	180	0	0	0	0	0	0	0	0	0	0	0	0	0	0	0	0	0	0	0	0	0	0	0	0	0	0	0	0	0	0	0	0
ASV414	0	0	0	0	0	0	0	0	0	0	0	0	0	0	0	0	0	0	0	0	0	0	0	0	0	0	0	4	0	610	0	0	0	0	0	7	0	0	0	0	0	0	0	0	0	0	4	0	0
ASV415	1495	8152	358	8265	2525	0	0	0	0	0	73	120	1026	1628	1178	0	0	51	0	0	29	0	2850	0	688	800	60	1967	0	492	381	67	19	137	0	16	0	0	42	14	0	30	19	147	55	11	72	0	0
ASV416	0	0	0	0	0	0	0	0	826	0	0	0	0	0	0	0	0	0	0	0	0	0	0	0	0	0	0	0	0	0	0	0	0	0	0	0	0	0	0	0	0	0	0	0	0	0	0	0	0
ASV417	0	0	0	0	0	0	0	0	0	0	0	0	0	0	0	0	0	0	0	0	0	15	0	0	3	0	0	0	0	0	3	0	0	0	0	0	0	0	0	0	0	0	0	0	0	0	0	0	0
ASV418	0	0	0	0	0	22	0	0	0	0	0	0	0	0	0	0	0	0	0	0	0	0	0	0	0	0	0	0	0	0	0	0	0	0	0	0	0	0	0	0	0	0	0	0	0	0	0	0	0
ASV419	0	0	0	0	0	0	0	0	0	0	0	0	0	0	0	0	0	0	0	180	0	0	0	0	0	0	0	21	0	276	0	0	0	0	0	36	0	171	57	0	0	0	0	0	0	191	147	48	49
ASV420	0	0	0	0	0	0	0	0	0	0	0	0	0	0	0	0	0	0	0	0	0	0	0	0	0	0	0	0	0	0	0	0	0	0	0	0	0	0	0	0	0	0	0	0	0	0	0	0	0
ASV421	0	0	0	0	0	0	0	0	27	0	0	0	0	0	0	0	0	0	0	0	0	0	0	0	0	0	0	0	0	0	0	0	0	0	0	0	0	0	0	0	0	0	0	0	0	0	0	0	0
ASV422	0	0	0	0	0	0	0	0	0	0	0	0	0	0	0	0	0	0	0	0	0	0	0	0	0	0	0	0	0	0	0	0	0	0	0	0	0	0	0	0	0	0	0	0	0	0	0	0	6
ASV423	0	0	0	0	0	0	0	0	0	0	0	0	0	0	0	0	0	0	0	0	0	0	0	0	0	0	14	0	0	0	0	0	0	0	0	0	0	0	0	0	0	0	0	0	0	0	0	0	0
ASV424	0	0	0	0	0	0	0	0	0	0	0	0	0	0	0	0	112	0	0	0	0	0	0	0	0	0	0	0	0	0	0	0	0	0	0	0	0	0	0	0	0	0	0	0	0	0	0	0	0
ASV425	0	0	0	0	0	0	0	0	0	0	0	0	0	0	0	0	0	0	0	0	0	0	0	0	0	0	0	0	0	0	0	0	0	0	0	0	0	0	0	0	0	0	0	0	0	0	0	0	0
ASV426	0	0	0	0	0	0	0	0	0	99	0	0	0	0	0	0	0	0	0	0	0	0	0	0	0	0	0	0	0	0	0	0	0	0	0	0	0	0	0	0	0	0	0	0	0	0	0	0	0
ASV427	0	0	0	0	0	0	0	0	0	0	0	0	0	0	0	0	0	0	0	0	162	0	82	460	104	0	0	0	0	0	0	0	0	83	255	0	0	0	0	0	0	0	0	0	92	0	0	0	0
ASV428	0	56	0	0	0	0	0	0	0	0	0	0	0	0	0	0	0	0	0	0	0	0	0	0	0	0	0	0	0	0	0	0	0	0	0	0	0	0	0	0	0	0	0	0	0	0	0	0	0
ASV429	0	37	0	0	0	0	0	0	0	0	0	0	0	0	0	0	0	0	0	0	0	0	0	0	0	0	0	0	0	0	0	0	0	0	0	0	0	0	0	0	0	0	0	0	0	0	0	0	0
ASV430	0	0	0	0	0	0	0	0	0	0	0	0	0	0	0	0	0	0	0	0	0	0	0	0	0	0	0	0	0	0	0	0	0	0	0	0	0	0	0	0	0	0	0	0	0	0	0	0	0
ASV431	0	0	0	0	0	0	0	0	0	0	0	0	0	0	0	0	0	0	15	0	0	0	0	0	0	0	0	0	0	0	0	0	0	0	0	0	0	0	0	0	0	0	0	0	0	0	0	0	0
ASV432	0	10	12	5	0	0	0	0	0	0	0	0	0	33	152	0	0	0	0	0	0	6	0	99	193	0	0	0	0	0	0	0	0	8	51	0	0	0	0	0	0	0	0	0	0	0	0	0	0
ASV433	0	0	4	0	0	0	0	0	0	0	15	0	0	0	0	0	0	0	0	0	0	0	0	0	0	0	0	0	0	0	0	0	0	0	0	0	0	0	0	0	0	0	0	0	0	0	0	0	0
ASV434	0	0	0	0	0	0	0	0	222	0	0	0	0	0	0	0	0	0	0	0	0	0	0	0	0	0	0	0	0	0	0	0	0	0	0	0	0	0	0	0	0	0	0	0	0	0	0	0	0
ASV435	0	0	0	0	0	0	0	0	0	0	0	0	0	0	0	0	0	0	0	0	0	0	75	0	0	0	0	0	0	0	0	0	0	0	0	0	0	0	0	0	0	0	0	0	0	0	0	0	0
ASV436	0	0	0	0	0	0	0	0	0	0	0	0	0	0	0	0	0	0	0	0	0	0	0	0	0	0	0	0	0	0	0	0	0	0	0	0	0	0	0	0	0	0	0	0	0	0	0	0	0
ASV437	0	0	0	0	0	0	0	0	0	0	0	0	470	0	0	0	0	0	0	0	0	0	122	0	0	0	53	0	0	0	0	0	0	0	0	0	0	0	0	0	0	0	0	0	0	0	0	0	0
ASV438	0	0	0	0	0	0	0	0	0	0	0	0	0	0	0	0	0	0	0	0	0	0	0	0	0	11	0	0	0	0	0	0	0	0	0	34	0	0	0	0	0	0	0	0	0	0	0	0	0
ASV439	0	0	0	0	0	0	0	0	0	0	0	0	0	0	0	0	0	0	0	0	0	0	103	0	0	0	0	0	0	0	0	0	0	0	0	0	0	0	0	0	0	0	0	0	0	0	0	0	0
ASV440	0	0	0	0	0	0	0	0	0	0	0	0	0	0	0	0	0	0	0	0	0	0	0	0	0	0	0	0	0	0	0	0	0	0	0	0	0	0	0	0	0	0	0	0	0	0	0	0	0
ASV441	0	0	0	0	0	0	0	0	0	0	0	0	0	0	0	0	0	0	0	0	0	0	0	0	0	0	4	0	0	0	0	0	0	0	0	0	0	0	0	0	0	0	0	0	0	0	0	0	0
ASV442	0	0	0	0	0	0	0	0	0	0	0	0	0	0	0	0	0	0	0	0	0	0	0	0	0	0	0	0	0	0	0	0	0	0	0	0	0	0	0	0	0	0	0	0	0	0	0	0	0
ASV443	0	0	0	0	0	0	0	100	0	0	0	0	0	0	0	0	0	0	0	0	0	0	0	0	0	0	0	0	0	0	0	0	0	0	0	0	0	0	0	0	0	0	0	0	0	0	0	0	0
ASV444	0	0	0	0	0	0	0	0	0	0	0	0	0	0	0	0	0	0	0	0	0	0	0	0	0	0	0	0	0	0	0	0	0	0	0	0	0	0	0	0	0	0	0	0	0	0	0	0	0
ASV445	0	7	0	0	0	0	0	0	0	0	0	0	79	0	0	0	0	0	0	0	0	9	0	0	0	0	0	0	0	0	0	7	0	0	0	0	0	0	0	0	0	0	0	2	0	0	0	0	0
ASV446	0	0	0	0	0	0	0	0	0	0	0	0	0	0	0	0	0	0	0	0	0	0	0	0	0	0	0	0	0	0	0	0	0	0	0	0	0	0	0	0	0	0	0	0	0	0	0	0	0
ASV447	0	0	0	0	0	0	0	0	0	0	0	0	0	0	0	0	0	0	0	0	0	13	0	0	0	0	0	0	0	0	0	0	0	0	0	0	0	0	0	0	0	0	0	0	0	0	0	0	0
ASV448	0	0	0	0	0	0	0	0	0	0	0	0	0	0	0	0	0	0	0	0	0	0	0	0	0	0	0	0	0	0	0	0	0	0	0	0	0	0	0	0	0	0	0	0	0	0	0	0	0
ASV449	0	0	0	0	0	19	34	0	0	0	0	0	0	0	0	0	0	0	0	0	4	0	0	0	0	0	0	0	0	0	0	0	0	0	0	0	0	0	0	0	0	0	0	0	0	0	0	0	0
ASV450	0	0	0	0	0	0	0	0	4	0	0	0	0	0	0	0	0	0	0	0	0	0	0	0	0	0	0	0	0	0	0	0	0	0	0	0	0	0	0	0	0	0	0	0	0	0	0	0	0
ASV451	0	0	0	0	0	0	0	0	0	0	0	0	0	0	0	0	0	0	0	0	0	0	0	0	0	0	254	0	0	0	0	0	0	0	0	0	0	0	0	0	0	0	0	0	0	0	0	0	0
ASV452	0	0	0	0	0	0	0	0	0	0	0	0	0	0	0	0	0	0	42	0	0	0	0	0	0	0	0	0	0	0	0	0	0	0	0	0	0	0	0	0	0	0	0	0	0	0	0	0	0
ASV453	0	0	0	0	0	0	0	0	0	0	0	0	7	0	0	0	0	0	0	0	0	0	0	0	0	0	0	0	0	0	0	0	0	0	0	0	0	0	0	0	0	0	0	0	0	0	0	0	0
ASV454	0	0	0	0	0	0	0	0	0	0	0	0	0	0	0	0	0	0	0	0	0	0	0	0	0	0	0	0	0	0	0	0	0	0	0	0	0	0	0	0	0	0	0	0	0	0	0	0	0
ASV455	0	0	0	0	0	0	0	0	0	0	0	0	0	0	0	0	0	0	0	15	0	0	0	0	0	0	0	0	0	0	0	0	0	0	0	0	0	0	0	0	0	0	0	0	0	0	0	0	0
ASV456	0	0	0	0	0	0	0	0	0	0	0	0	0	0	0	0	0	0	0	0	0	0	0	0	0	0	0	0	0	0	0	0	0	0	0	0	0	0	0	0	0	0	0	0	0	0	0	0	0
ASV457	0	0	0	0	0	0	0	0	13	0	0	0	0	29	0	0	0	0	0	0	0	0	276	0	0	0	0	0	0	0	0	0	0	0	0	19	0	0	0	0	0	0	3	0	0	0	0	0	0
ASV458	0	0	0	0	0	0	0	0	7	0	0	0	0	0	0	0	0	0	0	0	0	0	0	0	0	0	0	0	0	0	0	0	0	0	0	0	0	0	0	0	0	0	0	0	0	0	0	0	0
ASV459	0	0	0	0	0	0	0	0	0	0	0	0	0	0	0	0	0	0	0	0	0	0	0	0	0	0	4	0	0	0	0	0	0	0	0	0	0	0	0	0	0	0	0	0	0	0	0	0	0
ASV460	0	0	0	0	0	0	0	0	5	0	0	0	0	0	0	0	0	0	0	0	0	0	0	0	0	0	0	0	0	0	0	0	0	0	0	0	0	0	0	0	0	0	0	0	0	0	0	0	0
ASV461	0	0	0	0	0	0	117	0	0	0	0	0	0	0	0	0	0	0	10	0	0	0	0	0	0	0	0	0	0	0	0	0	0	0	0	0	0	0	0	0	0	0	0	0	0	0	0	0	0
ASV462	0	0	1047	0	399	0	0	0	0	0	9434	2396	357	3030	2297	0	0	0	0	0	2884	0	1042	0	0	0	0	0	0	0	10951	6615	1955	8930	0	0	0	0	0	0	7639	2071	9846	6212	1120	0	0	0	0
ASV463	100	83	0	0	0	0	0	0	0	0	0	0	212	57	0	0	0	0	0	0	0	0	0	0	0	0	0	0	0	0	0	0	0	0	0	0	0	0	0	0	0	0	0	0	0	0	0	0	0
ASV464	0	0	0	0	0	0	0	0	7	0	0	0	0	0	0	0	0	0	0	0	0	0	0	0	0	0	0	0	0	0	0	0	0	0	0	0	0	0	0	0	0	0	0	0	0	0	0	0	0
ASV465	0	0	0	0	0	0	0	0	0	0	0	0	0	0	0	0	0	0	0	0	0	0	0	0	0	0	0	0	0	0	0	0	0	0	0	0	0	0	0	0	0	0	0	0	0	0	0	0	0
ASV466	0	0	0	0	0	0	0	0	0	0	0	0	0	0	42	0	0	0	0	0	0	0	0	26	31	0	0	0	0	0	0	0	0	0	24	0	0	0	0	0	0	0	0	0	10	0	0	0	0
ASV467	0	7	0	0	0	0	0	0	0	0	0	0	0	0	0	0	0	0	0	0	0	0	0	0	0	0	0	0	0	0	0	0	0	0	0	0	0	0	0	0	0	0	0	0	0	0	0	0	0
ASV468	0	0	0	0	0	0	0	0	0	937	0	0	0	0	0	0	0	0	0	0	0	0	0	0	0	0	0	0	0	0	0	0	0	0	0	0	0	0	0	0	0	0	0	0	0	0	0	0	0
ASV469	0	0	0	0	0	0	0	0	0	0	0	0	0	0	15	0	0	0	0	0	0	0	0	15	9	0	0	0	0	0	0	0	0	0	0	0	0	0	0	0	0	0	0	0	0	0	0	0	0
ASV470	0	0	0	0	0	0	0	0	0	0	0	0	0	0	0	0	0	0	0	0	0	0	0	0	0	0	0	0	0	0	0	0	0	48	0	0	0	0	0	0	0	0	0	0	0	0	0	0	0
ASV471	0	0	7	0	24	0	0	0	0	0	0	0	0	0	0	0	0	0	0	0	0	0	0	6	0	0	0	0	0	0	0	0	0	0	0	0	0	0	0	0	0	0	0	0	0	0	0	0	0
ASV472	0	0	0	0	0	0	0	0	0	0	0	0	0	0	0	0	0	0	0	0	0	0	0	0	4	0	0	0	0	0	0	0	0	0	0	0	0	0	0	0	0	0	0	0	0	0	0	0	0
ASV473	0	0	0	0	0	0	0	0	0	0	0	0	0	0	0	0	0	0	0	0	0	0	0	0	0	0	0	6	0	0	0	0	0	0	0	0	0	0	0	0	0	0	0	0	0	0	0	0	0
ASV474	0	0	0	0	0	0	0	0	0	0	0	0	0	0	0	0	0	0	0	0	0	0	0	0	0	0	0	0	0	0	0	0	4	0	0	0	0	0	0	0	0	0	0	0	0	0	0	0	0
ASV475	0	0	0	0	0	0	0	0	0	0	0	0	0	0	0	0	0	0	0	4	0	0	0	0	0	0	3	0	0	0	0	0	0	0	0	15	0	0	0	0	0	0	0	0	0	0	0	0	0
ASV476	0	0	0	0	0	0	0	0	0	0	0	0	0	0	0	0	0	0	0	0	0	0	0	0	0	0	0	0	0	0	0	0	0	0	0	0	0	0	0	0	0	0	0	0	0	40	0	0	0
ASV477	0	0	0	0	0	0	0	0	0	0	0	0	3	0	0	0	0	0	0	0	0	0	0	0	0	0	0	0	0	0	0	0	0	0	0	0	0	0	0	0	0	0	0	0	0	0	0	0	0
ASV478	0	0	0	0	0	0	0	0	0	0	0	0	0	0	0	0	0	0	0	0	0	0	0	0	0	0	0	0	0	0	0	0	0	0	0	0	0	0	0	0	0	0	0	0	0	0	0	0	0
ASV479	0	0	0	0	0	0	0	46	0	0	0	0	0	0	0	0	0	0	0	0	0	0	0	0	0	0	0	0	0	0	0	0	0	0	0	0	0	0	0	0	0	0	0	0	0	0	0	0	0
ASV480	0	0	0	0	0	0	0	0	0	0	0	0	0	0	0	0	0	0	0	0	0	0	12	0	0	0	0	0	0	0	0	0	0	0	0	0	0	0	0	0	0	0	0	0	0	0	0	0	0
ASV481	0	0	0	0	0	0	0	0	0	0	0	0	0	0	0	0	0	0	0	0	0	0	0	0	0	0	0	130	0	0	0	0	0	0	0	0	0	0	0	0	0	0	0	0	0	0	0	0	0
ASV482	0	0	0	0	0	0	0	0	0	0	0	0	0	0	0	0	0	0	0	0	0	0	22	0	0	0	0	0	0	0	0	0	0	5	0	0	0	0	0	0	0	13	0	0	0	0	0	0	0
ASV483	0	0	0	0	0	0	0	0	0	0	0	0	0	0	0	0	0	0	7	10	0	0	0	0	0	0	0	7	0	356	0	0	0	0	0	12	0	163	33	10	0	0	0	0	0	107	23	9	41
ASV484	0	0	0	0	0	0	0	0	0	0	0	0	0	0	0	0	0	0	0	0	518	0	0	0	0	0	0	0	0	0	0	0	20	0	0	0	0	0	0	0	142	0	197	0	25	0	0	0	0
ASV485	0	0	0	0	0	2	0	0	0	0	0	0	0	0	0	0	0	0	0	0	0	0	0	0	0	0	0	0	0	0	0	0	0	0	0	0	0	0	0	0	0	0	0	0	0	0	0	0	0
ASV486	0	0	0	0	0	0	0	0	0	0	0	0	0	0	0	0	0	0	0	0	0	0	0	0	0	0	0	0	0	0	0	0	0	0	0	0	0	1195	0	0	0	0	0	0	0	0	0	0	0
ASV487	0	0	0	0	0	0	0	0	0	0	0	0	0	0	0	0	0	0	0	0	0	0	0	0	0	0	0	0	0	0	0	0	0	0	0	0	0	0	0	0	0	0	0	0	0	0	0	0	0
ASV488	0	0	3	0	0	42	150	0	0	0	0	0	0	0	0	0	0	0	0	0	0	0	0	0	0	0	0	0	0	0	0	0	0	0	0	0	0	0	0	0	0	0	7	0	0	0	0	0	0
ASV489	0	0	0	0	4	0	0	0	0	0	0	0	0	0	0	0	0	0	0	0	0	0	0	0	0	136	0	0	0	0	0	0	0	0	0	0	0	0	0	0	0	0	0	0	0	0	0	0	0
ASV490	0	0	0	0	0	0	0	0	0	0	14	3	300	0	0	0	0	0	0	0	0	0	0	0	13	0	0	0	0	0	0	0	0	0	0	0	0	0	0	0	0	0	0	0	0	0	0	0	0
ASV491	0	0	0	0	0	0	0	0	0	0	0	0	0	2	0	0	0	0	0	0	0	0	0	0	0	0	0	0	0	0	0	0	0	0	0	0	0	0	0	0	0	0	0	0	0	0	0	0	0
ASV492	0	0	0	0	0	0	0	21	0	0	0	0	0	0	0	0	0	0	0	0	0	0	0	0	0	0	0	0	0	0	0	0	0	0	0	0	0	0	0	2	0	0	0	0	0	0	0	0	0
ASV493	0	0	0	0	0	0	0	0	0	0	0	0	0	0	0	0	0	0	0	0	0	0	0	0	0	0	0	0	0	0	0	0	0	0	0	0	0	0	0	0	0	0	0	0	0	0	0	0	3
ASV494	0	0	0	0	0	0	0	0	0	0	0	0	0	0	0	0	0	0	0	0	0	0	0	0	0	0	0	0	0	0	5	0	0	0	0	0	0	0	0	0	0	0	0	0	0	0	0	0	0
ASV495	0	0	0	0	0	0	0	0	0	0	0	0	0	0	0	0	0	0	0	0	0	0	0	0	0	0	0	0	0	0	0	0	0	0	0	3	0	7	0	0	0	0	0	0	0	0	0	0	0
ASV496	0	0	0	0	0	0	0	0	0	0	0	0	8	0	0	0	0	0	0	0	0	0	0	0	0	0	0	0	0	0	0	0	0	0	0	0	0	0	0	0	0	0	0	0	0	0	0	0	0
ASV497	0	0	0	0	0	0	0	0	0	0	29	0	0	0	52	0	0	0	0	0	53	0	99	509	140	0	0	0	0	0	0	0	31	41	188	0	0	0	0	0	0	0	0	0	59	0	0	0	0
ASV498	0	0	0	0	0	0	0	0	0	0	0	0	0	0	0	0	0	0	0	0	0	0	0	0	0	0	0	0	0	0	0	0	0	0	0	0	0	0	0	0	0	0	0	0	0	0	0	0	0
ASV499	0	0	0	0	0	0	0	0	0	0	0	0	0	0	0	0	0	0	0	0	0	0	0	0	0	0	0	0	0	0	0	0	0	0	0	0	0	0	0	0	0	0	0	2	0	0	0	0	0
ASV500	0	0	4	0	0	0	0	0	0	0	0	19	0	0	0	0	0	0	0	0	8	0	0	0	0	0	0	0	0	0	0	6	0	0	0	0	0	0	0	0	2	0	0	0	8	0	0	0	0
ASV501	0	0	0	0	0	0	0	0	0	0	0	0	0	0	0	0	0	67	0	0	0	0	0	0	0	0	0	0	0	0	0	0	0	0	0	0	0	0	0	0	0	0	0	0	0	0	0	0	0
ASV502	0	0	0	0	0	0	0	0	0	0	0	0	0	0	0	0	0	0	0	0	0	0	0	0	0	0	0	0	0	0	0	0	0	0	0	0	0	0	0	0	0	0	197	0	0	0	0	0	0
ASV503	0	0	0	0	0	0	0	0	0	0	0	0	0	0	0	0	0	0	0	0	0	0	0	0	0	0	0	0	0	0	0	0	0	0	0	0	0	0	0	4	0	0	0	0	0	0	0	0	0
ASV504	0	0	0	0	0	0	0	0	0	0	0	0	0	0	0	0	0	0	0	0	0	0	0	0	0	0	0	0	0	0	0	0	0	0	0	0	0	0	0	0	0	0	0	0	0	0	0	0	0
ASV505	0	56	0	0	0	6	69	16	126	0	3	0	18	0	0	0	0	0	0	0	0	18	0	5	3	0	0	0	0	123	0	0	0	0	0	0	5	0	0	12	0	0	0	0	0	0	0	0	7
ASV506	22	0	0	0	0	5	0	892	0	0	11	0	0	0	18	0	0	31	0	0	0	0	0	42	4	10	0	0	0	0	0	0	0	0	0	0	0	0	0	0	0	0	0	0	0	0	0	0	0
ASV507	0	0	0	0	0	0	0	0	0	0	0	0	0	0	0	0	0	0	0	0	0	0	0	0	0	132	0	0	0	0	0	0	0	0	0	0	0	0	0	0	0	0	0	0	0	0	0	0	0
ASV508	0	0	0	0	0	0	44	0	0	0	0	0	0	0	0	0	0	0	0	0	0	0	0	0	8	16	5	5	0	621	0	0	0	0	0	0	4	0	0	0	0	0	2	0	0	0	0	0	0
ASV509	0	0	0	0	0	0	0	0	0	0	0	0	0	0	0	0	0	0	0	0	0	0	0	0	0	0	0	0	0	0	0	0	0	0	0	0	0	0	0	0	0	0	0	0	0	0	0	0	0
ASV510	0	20	0	0	0	0	0	0	0	0	0	0	0	0	0	0	0	0	0	0	0	0	0	0	0	0	0	0	0	0	0	0	0	0	0	0	0	0	0	0	0	0	0	0	0	0	0	0	0
ASV511	0	0	0	0	0	0	0	0	6	0	0	0	0	0	0	0	0	0	0	0	0	0	0	0	0	0	0	0	0	0	0	0	0	0	0	0	0	0	0	0	0	0	0	0	0	0	0	0	0
ASV512	0	0	0	0	0	0	0	0	0	514	0	0	0	0	0	0	0	0	0	0	0	0	0	0	0	0	0	0	0	0	0	0	0	0	0	0	0	0	0	0	0	0	0	0	0	0	0	0	0
ASV513	0	0	0	0	0	0	0	0	0	0	0	0	0	0	0	0	0	0	0	0	12	0	9	8	0	367	0	11	12	0	0	11	0	0	0	77	17	86	0	7	4	0	0	0	18	56	0	3	46
ASV514	0	0	0	0	0	0	0	0	0	0	0	0	0	0	0	0	0	0	0	0	0	0	0	0	0	0	0	0	0	0	0	0	0	0	0	0	0	0	0	0	0	0	0	0	0	0	0	0	0
ASV515	0	0	0	0	0	0	0	0	0	0	0	0	0	0	0	0	1362	0	0	0	0	0	0	0	3	0	0	0	0	0	0	0	0	0	0	0	0	0	0	0	0	0	0	0	0	0	0	0	0
ASV516	0	0	0	0	0	0	0	0	0	0	0	0	0	0	0	0	0	0	0	0	0	0	8	0	0	0	0	0	0	0	0	0	0	0	15	0	0	0	0	0	0	0	0	12	40	0	0	0	0
ASV517	0	0	0	0	0	0	0	0	0	0	0	0	0	0	0	0	0	0	0	0	0	0	0	0	0	0	0	9	0	0	0	0	0	0	0	135	0	0	0	0	0	0	0	0	0	0	0	0	0
ASV518	0	0	0	0	0	0	0	0	0	0	0	0	0	0	12	0	0	0	0	0	45	1897	193	3	4	0	8	0	0	0	26	115	22	0	0	0	0	0	0	0	0	0	71	157	108	0	0	0	0
ASV519	0	0	0	0	0	0	0	48	0	0	0	0	0	0	0	0	0	0	0	0	0	0	0	0	9	0	0	0	0	0	0	0	0	0	0	0	0	0	0	0	0	0	0	0	0	0	0	0	0
ASV520	0	0	0	0	0	0	0	0	0	0	0	0	0	0	0	0	0	0	0	0	0	0	0	0	0	0	0	0	0	0	0	0	0	0	0	0	0	2	0	0	0	0	0	0	0	0	0	0	0
ASV521	0	0	0	0	0	0	0	0	0	0	98	104	107	0	0	0	0	0	0	0	0	0	0	0	0	0	0	0	0	0	0	0	0	0	0	0	0	0	0	0	0	0	0	0	0	0	0	0	0
ASV522	0	0	0	0	0	0	0	0	0	0	0	0	0	0	0	0	0	0	0	0	0	0	0	0	0	0	0	0	0	0	0	0	0	0	0	0	0	0	0	0	0	0	0	0	0	0	0	0	0
ASV523	0	0	0	0	0	0	694	0	0	0	0	0	0	0	0	0	0	0	0	0	0	0	19	0	0	0	0	0	0	0	0	0	0	0	0	0	0	0	0	0	0	0	0	0	0	0	0	0	0
ASV524	0	0	0	0	0	0	0	0	0	0	0	0	67	0	0	0	0	0	0	0	0	0	0	0	0	0	0	0	0	0	0	0	0	0	0	0	0	0	0	0	0	0	49	0	0	0	0	0	0
ASV525	0	0	0	0	0	0	0	0	0	0	0	0	0	0	0	0	0	0	0	0	0	0	17	0	0	0	0	0	0	0	0	0	0	0	0	0	0	0	0	0	0	0	0	0	0	0	0	0	0
ASV526	0	0	0	0	0	0	0	43	0	0	0	0	0	0	0	0	0	0	0	0	0	0	0	0	0	0	0	0	0	0	0	0	0	0	0	0	0	0	0	0	0	0	0	0	0	0	0	0	0
ASV527	0	0	242	0	0	0	0	0	0	0	154	4630	2	0	4	0	0	0	0	0	0	20	0	0	0	0	0	0	0	0	0	0	0	0	0	0	0	0	0	3	0	0	0	0	3	0	0	0	0
ASV528	0	0	0	0	0	0	0	0	0	0	0	0	0	0	0	0	0	0	0	0	0	0	0	0	0	377	0	0	0	0	0	0	0	0	0	87	0	0	0	9	0	0	0	0	0	0	0	0	0
ASV529	0	0	0	0	0	0	0	0	0	0	0	0	0	0	0	0	0	0	0	0	0	0	0	0	0	0	0	0	0	0	0	0	0	0	0	0	0	0	0	0	0	0	0	0	0	0	0	0	0
ASV530	0	0	0	0	0	0	0	0	0	0	0	0	0	0	0	114	0	0	0	0	0	0	0	0	0	0	0	0	0	0	0	0	0	0	0	0	0	0	0	0	0	0	0	0	0	0	0	0	0
ASV531	0	0	0	0	0	0	0	0	0	0	0	0	0	0	0	0	0	0	0	0	0	0	0	0	0	0	0	0	0	0	0	0	0	0	0	0	0	0	0	0	0	0	0	0	0	0	0	0	0
ASV532	0	64	0	0	0	0	0	0	0	0	0	0	0	0	0	0	0	0	0	0	0	0	0	0	0	0	0	0	0	0	0	0	0	0	0	0	0	0	0	0	0	0	0	0	0	0	0	0	0
ASV533	0	0	0	0	0	0	0	0	0	0	0	61	0	0	0	0	0	0	0	0	0	0	9	0	0	0	0	0	0	0	0	0	0	0	0	0	0	0	0	0	0	0	0	0	0	0	0	0	0
ASV534	0	0	0	0	0	0	0	0	0	0	0	0	0	0	0	0	0	0	0	0	0	0	0	0	15	0	0	0	0	0	0	0	0	0	0	0	0	0	0	0	0	0	0	0	0	0	0	0	0
ASV535	0	0	0	0	0	0	0	0	0	0	0	0	0	0	0	0	0	0	0	12	0	0	0	0	0	0	0	0	0	0	0	0	0	0	0	0	0	0	0	0	0	0	0	0	0	0	0	0	0
ASV536	11	5	43	0	17	0	0	0	0	0	20	0	582	66	0	0	0	0	0	0	9	43	0	0	0	0	0	0	0	0	73	23	8	72	12	0	69	50	0	0	204	0	202	18	10	0	116	0	31
ASV537	0	0	0	0	66	0	0	13	0	0	0	0	0	9	0	0	0	0	0	0	4	0	0	0	8	0	434	0	0	0	0	0	0	0	0	0	0	0	0	0	0	0	0	12	0	0	0	0	0
ASV538	0	3	0	0	0	0	0	0	0	0	0	0	0	0	0	0	0	0	0	0	0	0	0	0	0	0	0	0	0	0	0	0	0	0	0	0	0	0	0	0	0	0	0	0	0	0	0	0	0
ASV539	0	0	0	0	0	0	0	0	0	0	0	0	0	0	0	0	0	0	0	0	0	0	13	0	0	0	0	0	0	0	0	0	0	0	0	0	0	0	0	0	0	0	0	0	0	0	0	0	0
ASV540	0	0	0	0	0	0	0	0	0	0	0	0	0	0	0	0	0	0	54	0	0	0	0	0	48	0	0	506	0	0	0	0	0	0	0	0	0	0	0	0	0	0	0	0	0	0	0	0	0
ASV541	0	0	0	0	0	0	0	0	0	0	0	0	0	0	0	0	0	43	35	0	0	28	30	2	0	0	214	0	0	0	0	0	0	0	0	0	0	0	0	0	0	0	0	21	0	0	0	0	0
ASV542	0	0	0	0	0	0	0	0	0	0	0	0	0	0	0	0	0	0	0	0	0	0	0	0	0	0	0	0	0	2	0	0	0	0	0	0	0	0	0	0	0	0	0	0	0	0	0	0	0
ASV543	0	0	0	0	5	0	0	0	0	0	0	0	0	0	0	88	0	0	0	0	0	0	0	0	0	0	0	0	5	0	0	0	0	0	0	7	0	0	0	0	0	0	0	0	0	0	0	0	0
ASV544	0	0	0	0	0	0	0	0	0	65	0	0	0	0	0	0	0	0	0	0	0	0	0	0	0	0	0	0	0	0	0	0	0	0	0	0	0	0	0	0	0	0	0	0	0	0	0	0	0
ASV545	0	0	0	0	0	0	0	0	0	0	0	0	0	0	0	0	0	0	0	0	0	0	0	0	0	0	0	0	0	0	0	0	0	0	0	0	0	0	0	0	0	0	0	0	0	0	0	0	0
ASV546	0	0	65	0	6	0	0	0	0	0	34	31	0	26	30	0	0	0	0	2	12	101	34	2380	2730	0	0	0	9	0	34	12	3	88	72	0	0	0	0	4	0	4	12	0	6	0	7	0	0
ASV547	0	0	0	0	0	0	44	0	0	0	0	0	0	0	0	0	0	0	0	0	0	0	0	0	0	0	0	0	0	0	0	0	0	0	0	0	0	0	0	0	0	0	0	0	0	0	0	0	0
ASV548	0	0	0	0	0	0	0	0	0	0	0	0	0	0	0	0	0	0	0	0	0	0	0	0	0	0	0	0	0	0	0	0	0	0	0	10	0	0	0	0	0	0	0	0	0	0	0	0	0
ASV549	0	0	0	0	0	0	0	0	0	0	0	0	0	0	0	0	0	0	0	0	0	0	0	0	0	5	0	0	0	0	0	0	0	0	0	0	0	0	0	0	0	0	0	0	0	0	0	0	0
ASV550	0	0	0	0	7	0	0	0	0	0	0	0	0	0	0	0	0	0	0	0	0	0	0	0	0	0	4	0	0	0	0	0	0	0	0	2	0	0	0	0	0	0	0	0	0	0	0	0	0
ASV551	0	0	0	0	0	0	0	0	0	0	0	0	0	0	0	0	0	0	0	0	0	0	0	0	0	0	0	0	0	0	0	0	0	0	0	0	0	0	0	0	0	0	0	0	0	0	0	0	0
ASV552	0	0	0	0	0	0	0	0	8	0	0	0	0	0	0	0	0	0	0	0	0	0	0	0	0	0	0	0	0	0	0	0	0	0	0	0	0	0	0	0	0	0	0	0	0	0	0	0	0
ASV553	0	0	0	0	0	0	0	0	0	0	0	0	0	0	0	0	0	0	0	0	0	0	0	0	0	12	0	0	35	0	0	0	0	0	0	127	18	417	29	0	0	0	0	0	0	100	0	34	39
ASV554	0	0	0	0	0	0	0	0	0	0	0	0	0	0	0	0	0	0	0	0	0	0	0	0	0	0	7	0	0	0	0	0	0	0	0	0	0	0	0	0	0	0	0	0	0	0	0	0	0
ASV555	0	0	0	0	0	0	0	0	0	0	0	0	0	0	0	0	0	0	0	0	0	0	0	0	0	0	0	0	0	0	0	0	0	0	0	0	0	0	0	0	0	0	0	0	0	0	0	0	0
ASV556	0	0	191	0	0	0	0	0	0	0	41	0	0	0	0	0	0	0	0	0	0	0	0	0	0	0	0	0	0	0	0	0	0	0	0	0	0	0	0	0	0	0	0	0	0	0	0	0	0
ASV557	0	0	0	0	0	0	0	0	0	0	0	0	0	0	0	0	0	0	0	0	0	0	0	0	0	0	21	0	0	0	0	0	0	0	0	0	0	0	0	0	0	0	0	0	0	0	0	0	0
ASV558	0	0	0	0	0	0	0	0	0	0	0	0	0	0	0	0	0	0	0	0	0	0	0	0	0	0	0	0	0	82	0	0	0	0	0	0	0	0	0	0	0	0	0	0	0	0	0	0	0
ASV559	0	0	0	0	0	0	0	0	0	0	0	0	0	0	0	0	0	0	0	0	0	0	0	0	0	0	0	0	1932	0	0	0	0	0	0	0	0	0	0	0	0	0	0	0	0	0	0	0	0
ASV560	0	0	0	0	0	0	0	0	0	0	0	0	0	0	0	0	0	0	22	0	0	0	0	0	0	0	0	0	0	0	0	0	0	0	0	0	0	0	0	0	0	0	0	0	0	0	0	0	0
ASV561	0	70	0	0	24	16052	12330	19046	5344	10630	0	473	17	0	188	3850	385	4049	8673	0	1072	5656	1239	6488	4024	2269	2096	923	6427	9993	3291	175	662	1871	5985	7358	163	0	4355	1535	755	3403	2537	598	3402	336	2399	2601	404
ASV562	0	0	0	0	0	0	0	0	0	0	0	0	0	0	0	0	0	0	0	0	0	0	0	0	0	0	0	0	0	0	0	0	0	0	0	18	0	0	0	0	0	0	0	0	0	0	0	0	0
ASV563	0	138	23316	0	0	0	0	0	0	0	2435	2115	1269	8515	3744	0	0	0	0	0	19136	0	385	0	0	0	0	0	0	0	2751	6383	1425	1865	0	0	0	0	0	0	2153	22151	1500	12792	117	0	0	0	0
ASV564	0	0	0	0	0	0	0	0	0	0	0	0	0	0	0	0	0	17	0	0	0	0	0	0	0	0	0	92	0	0	0	0	0	0	0	20	4	0	0	0	0	0	0	0	0	0	0	0	0
ASV565	0	0	0	0	0	0	0	0	0	0	0	0	0	0	0	0	0	0	0	0	0	0	0	0	0	7	0	0	0	0	0	0	0	0	0	0	0	0	0	0	0	0	0	0	0	0	0	0	0
ASV566	0	0	0	0	0	0	0	0	0	0	0	0	0	0	11	0	0	0	0	0	0	0	0	0	0	0	0	0	0	0	0	0	0	0	0	0	0	0	0	0	0	0	0	0	0	0	0	0	0
ASV567	0	0	0	0	0	0	0	0	36	0	0	0	0	0	0	0	0	0	0	0	0	0	0	0	0	0	0	0	0	0	0	0	0	0	0	0	0	0	0	0	0	0	0	0	0	0	0	0	0
ASV568	0	0	0	0	0	0	0	0	0	0	0	0	0	0	0	0	0	0	0	0	0	0	16	0	0	0	0	0	0	0	17	0	0	0	0	0	0	0	0	0	0	27	0	0	23	0	0	0	0
ASV569	0	0	0	0	0	0	0	0	0	0	0	0	0	0	0	0	0	0	0	0	0	0	0	0	0	0	0	0	0	0	0	0	0	2	0	0	0	0	0	0	0	0	0	0	0	0	0	0	0
ASV570	0	0	0	0	0	0	0	0	0	0	0	0	0	0	0	0	0	0	0	0	0	0	0	0	0	0	0	0	0	0	0	0	0	0	0	0	0	0	0	0	0	0	0	0	0	0	0	0	0
ASV571	0	0	0	0	0	0	0	0	0	0	0	0	6	0	0	0	0	0	0	0	0	0	54	0	11	81	0	0	0	0	0	0	0	0	0	411	0	0	0	0	0	0	0	0	0	0	0	0	0
ASV572	0	0	0	0	0	0	0	0	8	0	0	0	0	0	0	0	0	0	0	0	0	0	0	0	0	0	0	0	0	0	0	0	0	0	0	0	0	0	0	0	0	0	0	0	0	0	0	0	0
ASV573	0	40	0	0	0	0	0	0	0	0	0	0	0	0	0	0	0	0	0	0	0	0	0	0	0	0	0	0	0	0	0	0	0	0	0	0	0	0	0	0	0	0	0	0	0	0	0	0	0
ASV574	1074	0	0	0	0	0	0	0	0	0	0	0	0	0	0	0	0	0	0	0	0	0	0	0	0	0	0	0	0	0	0	0	0	0	0	0	0	0	0	0	0	0	0	0	0	0	0	0	0
ASV575	0	0	0	0	0	0	70	0	0	519	0	0	0	0	0	0	0	0	0	0	0	51	3	0	12	0	0	0	0	0	0	0	0	0	0	0	0	0	0	0	0	0	0	0	0	0	0	0	0
ASV576	0	0	0	0	0	0	0	0	0	0	0	0	0	0	0	0	32	0	0	0	0	0	0	0	0	0	0	0	0	0	0	0	0	0	0	0	0	0	0	0	0	0	0	0	0	0	0	0	0
ASV577	0	0	0	0	0	0	0	0	0	0	0	0	0	2	0	0	0	0	0	0	0	0	0	0	0	0	0	0	0	0	0	0	0	0	0	0	0	0	0	0	0	0	0	0	0	0	0	0	0
ASV578	0	0	0	0	0	0	0	0	0	0	0	0	0	6	0	0	0	0	0	0	0	0	0	0	0	0	0	0	0	0	0	0	0	0	0	0	0	0	0	0	0	0	0	0	0	0	0	0	0
ASV579	0	0	0	0	0	0	0	0	0	0	0	0	0	0	0	0	0	0	0	0	0	0	0	0	0	5	0	0	0	0	0	0	0	0	0	0	0	0	0	0	0	0	0	0	0	0	0	0	0
ASV580	0	0	0	0	0	0	0	0	0	0	0	0	0	0	0	0	0	0	0	0	0	0	0	0	0	0	0	0	0	0	0	0	0	0	0	135	0	0	0	0	0	0	0	0	0	0	0	0	0
ASV581	0	34	0	0	0	0	0	0	0	0	0	0	0	0	0	0	0	0	0	0	0	0	0	0	0	0	0	0	0	0	0	0	0	0	0	0	0	0	0	0	0	0	0	0	0	0	0	0	0
ASV582	0	0	0	0	0	0	0	0	0	0	0	0	0	0	0	0	0	20	0	0	0	0	0	0	0	0	0	0	0	0	0	0	0	0	0	0	0	0	0	0	0	0	0	0	0	0	0	0	0
ASV583	0	0	0	0	0	0	0	0	0	0	0	0	0	0	0	0	0	0	0	0	7	12	0	0	0	0	0	0	0	0	0	0	0	0	0	0	0	0	0	0	0	0	0	0	0	0	0	0	0
ASV584	0	0	0	0	0	0	0	283	0	0	0	0	0	0	0	0	0	0	0	0	0	0	0	0	0	0	0	0	0	0	0	0	0	0	0	0	0	0	0	0	0	0	0	0	0	0	0	0	0
ASV585	0	0	0	0	0	0	0	0	0	0	0	0	0	0	0	0	0	0	0	0	0	0	0	0	0	0	0	0	0	0	0	0	0	0	0	0	0	0	0	0	0	0	0	0	0	0	0	0	0
ASV586	0	0	0	0	0	0	0	0	0	0	6	0	0	0	0	0	0	0	0	0	0	0	0	0	0	0	0	0	0	0	0	0	0	0	0	0	0	0	0	0	0	0	0	0	0	0	0	0	0
ASV587	0	0	0	0	0	0	0	0	0	0	0	0	0	0	0	0	0	0	0	0	0	0	0	0	0	0	0	0	208	0	0	0	0	0	0	0	0	0	0	0	0	0	0	0	0	0	0	0	0
ASV588	0	0	0	0	0	0	0	0	0	0	0	0	0	0	0	0	0	0	0	0	0	0	0	0	0	0	0	0	0	0	0	0	0	0	0	6	0	0	0	0	0	0	0	0	0	0	0	0	0
ASV589	0	0	0	0	26	0	0	0	0	0	0	0	0	0	0	0	0	0	0	0	0	0	14	0	0	0	0	0	0	0	0	0	0	0	0	0	0	0	0	0	0	0	0	0	0	0	0	0	0
ASV590	0	0	0	0	0	11	0	40	0	0	0	0	0	0	0	8	0	131	142	475	69	51	29	50	0	27	283	26	105	121	69	99	26	66	94	1563	39	1231	691	183	22	84	43	15	316	692	350	853	654
ASV591	0	0	0	0	0	0	0	0	0	0	0	0	0	0	0	0	0	0	0	0	0	0	0	0	0	0	0	0	0	0	0	0	0	0	2	0	0	0	0	0	0	0	0	0	0	0	0	0	0
ASV592	0	0	0	0	0	340	528	57	0	0	0	0	0	0	0	0	0	0	0	0	0	0	0	0	0	0	11	0	0	1280	0	0	0	0	0	0	0	0	0	0	0	0	0	0	0	0	0	0	0
ASV593	0	0	0	0	0	0	0	0	0	0	0	0	0	0	20	0	0	0	0	0	0	0	0	0	0	0	0	0	0	0	0	0	0	0	0	0	0	0	0	0	0	0	0	0	0	0	0	0	0
ASV594	0	0	0	0	0	0	0	0	0	63	0	0	0	0	0	0	0	0	0	0	0	0	0	0	0	0	0	0	0	0	0	0	0	0	0	0	0	0	0	0	0	0	0	0	0	0	0	0	0
ASV595	0	0	0	0	14	0	0	0	0	0	0	0	0	0	16	0	0	0	0	0	0	0	0	0	0	0	0	0	0	0	0	0	0	0	0	0	0	0	0	0	0	0	0	0	0	0	0	0	0
ASV596	0	0	27	20	0	0	0	0	0	0	15	0	353	0	140	100	263	0	0	0	0	0	0	0	0	0	98	0	0	0	0	0	0	0	0	0	0	0	0	0	0	0	0	0	0	0	0	0	0
ASV597	0	0	0	0	0	0	0	0	0	0	0	0	0	0	0	0	0	0	0	0	0	0	0	0	0	27	0	0	0	0	0	0	0	0	0	8	0	0	0	0	0	0	0	3	0	0	0	0	0
ASV598	0	0	0	0	0	0	0	0	0	0	0	0	0	0	0	0	0	0	0	0	0	0	0	0	2	0	0	0	0	0	0	0	0	0	0	0	0	0	0	0	0	0	0	0	0	0	0	0	0
ASV599	0	0	0	0	0	0	0	0	0	0	0	0	0	0	0	0	0	0	0	0	0	0	0	0	0	0	0	0	0	0	0	0	0	0	0	0	0	0	0	0	0	0	0	0	0	0	0	0	0
ASV600	0	3	0	0	3	0	0	0	0	0	0	0	0	0	0	75	0	0	0	0	0	0	0	0	0	0	0	0	0	0	0	0	0	0	0	0	0	0	0	0	0	0	0	0	0	0	0	0	0
ASV601	0	0	0	0	0	0	0	0	0	0	0	0	0	0	0	0	0	0	0	0	0	0	0	0	0	0	0	0	0	0	0	0	0	0	0	0	0	0	0	0	0	0	0	0	0	0	0	0	0
ASV602	0	0	0	0	0	0	0	0	0	0	0	0	0	0	0	0	0	0	0	0	18	0	0	0	0	0	0	0	0	0	0	0	0	0	0	0	0	0	0	0	0	0	0	0	0	0	0	0	0
ASV603	0	0	0	0	0	0	0	0	0	0	0	0	0	0	0	0	0	16	0	0	0	0	0	8	0	0	0	0	0	0	0	0	0	0	0	0	0	0	0	0	0	0	6	0	0	0	0	0	0
ASV604	0	0	0	0	0	0	0	0	0	0	0	11	0	8	0	0	0	0	0	0	186	390	606	0	71	0	0	0	0	0	0	0	0	0	0	0	0	0	0	0	0	0	0	0	0	0	0	0	0
ASV605	0	0	0	0	0	0	0	0	0	0	0	0	0	0	0	0	0	0	0	0	0	0	0	0	0	0	0	0	0	0	0	0	0	0	0	0	0	0	0	0	0	0	0	0	0	0	0	0	0
ASV606	0	0	0	0	0	0	0	0	0	0	0	0	0	0	0	0	0	0	0	0	0	0	0	0	0	0	0	0	0	0	0	0	0	0	0	0	0	0	0	0	0	0	0	0	0	0	0	0	0
ASV607	0	0	0	0	0	0	0	0	0	0	0	0	0	0	0	0	0	0	58	0	0	0	0	0	0	0	0	0	0	0	0	0	0	0	0	0	0	0	0	0	0	0	0	0	0	0	0	0	0
ASV608	261	0	0	0	0	36	0	0	0	0	0	0	0	0	0	0	0	0	112	0	19	50	123	0	0	0	149	0	0	0	0	86	0	17	0	275	0	171	0	0	2	13	57	0	403	0	32	0	56
ASV609	23	0	0	0	0	0	0	0	0	0	0	0	0	0	0	0	0	0	0	0	0	0	0	0	0	0	0	0	0	0	0	0	0	0	0	0	0	0	0	0	0	0	0	0	0	0	0	0	0
ASV610	0	0	0	0	0	0	0	0	0	0	0	0	0	0	0	0	0	0	0	0	0	15	0	0	0	0	0	0	0	0	0	0	0	0	0	0	0	0	0	0	0	0	0	0	0	0	0	0	0
ASV611	0	0	49	0	0	0	0	0	0	0	0	0	0	0	0	0	0	0	0	0	0	0	0	0	0	0	0	0	0	0	0	0	0	0	0	0	0	0	0	0	0	0	0	0	0	0	0	0	0
ASV612	0	0	0	0	0	0	0	0	0	0	0	0	0	0	0	0	0	0	0	0	0	3	0	0	0	0	0	0	0	0	0	0	0	0	0	0	0	0	0	0	0	0	0	0	0	0	0	0	0
ASV613	5358	22724	1103	18418	9362	20	39	15	105	0	194	367	209	7336	3314	0	2413	1306	737	854	1075	3902	9736	15	2279	1249	154	3478	0	690	2814	2568	397	6568	136	1355	0	0	317	96	0	1845	1282	4275	290	24	125	0	0
ASV614	0	0	0	0	0	0	0	0	0	0	0	0	0	0	10	0	0	0	0	0	0	0	0	0	31	0	0	0	0	0	0	0	0	0	25	0	0	0	0	0	0	0	0	0	0	0	0	0	0
ASV615	0	0	0	0	0	0	0	0	0	765	0	0	0	0	0	0	0	0	0	0	0	0	0	0	0	0	0	0	0	0	0	0	0	0	0	0	0	0	0	0	0	0	0	0	0	0	0	0	0
ASV616	0	0	0	0	0	0	0	0	0	0	0	0	0	0	0	0	0	0	0	0	1	0	0	0	0	0	0	0	0	0	3	0	0	0	0	0	0	0	0	0	0	0	0	0	0	0	0	0	0
ASV617	0	0	0	0	0	22	0	0	0	0	0	26	0	0	0	0	0	0	3	0	0	179	78	866	122	0	0	0	0	0	126	0	0	80	742	0	0	0	0	0	49	0	75	17	294	0	0	0	0
ASV618	0	0	0	0	0	0	0	0	0	0	0	0	0	0	0	0	0	0	0	0	0	0	0	0	0	0	6	0	0	0	0	0	0	0	0	0	0	0	0	0	0	0	0	0	0	0	0	0	0
ASV619	0	0	0	0	0	0	0	0	0	0	0	0	0	0	0	0	0	0	0	0	0	0	0	0	0	0	6	0	0	0	0	0	0	0	0	0	0	0	0	0	0	0	0	0	0	0	0	0	0
ASV620	0	0	0	0	0	0	0	0	0	0	0	0	0	0	0	0	0	0	0	0	0	0	0	0	0	0	0	0	2	0	0	0	0	0	0	0	0	0	0	0	0	0	0	0	0	0	0	0	0
ASV621	0	0	0	0	0	0	0	0	0	0	0	0	0	0	0	0	0	0	0	0	0	0	8	0	0	0	0	0	0	0	0	0	0	0	0	0	0	0	0	0	0	0	0	0	0	0	0	0	0
ASV622	0	0	0	0	0	0	0	0	0	0	0	0	47	0	0	0	0	0	0	0	0	7	0	0	0	0	0	0	0	0	0	0	0	0	0	0	0	0	0	0	0	0	0	0	0	0	0	0	0
ASV623	0	17	0	0	0	0	0	0	0	0	0	0	0	0	0	0	0	0	0	0	0	0	0	0	0	0	15	0	0	0	0	0	0	0	0	0	0	0	0	0	0	0	0	0	0	0	0	0	0
ASV624	0	0	2	0	0	0	0	0	0	0	0	0	0	0	0	0	0	0	0	0	0	0	0	0	0	0	0	0	0	0	0	0	0	0	0	0	0	0	0	0	0	0	0	0	0	0	0	0	0
ASV625	11	0	0	0	0	0	0	0	0	0	0	0	0	0	0	0	0	39	11	0	0	0	0	0	0	0	0	0	0	0	0	0	0	0	0	0	33	5	0	0	0	0	0	0	0	0	0	4	0
ASV626	0	0	0	0	6	0	0	0	8	0	41	142	65	0	0	0	0	0	0	0	0	0	56	403	108	0	0	0	0	0	11	0	0	24	35	0	0	0	0	0	6	0	0	0	0	0	0	0	0
ASV627	0	0	0	0	0	0	0	0	0	0	0	0	0	0	0	0	111	0	0	0	0	0	0	0	0	0	0	0	0	0	0	0	0	0	0	0	0	0	0	0	0	0	0	0	0	0	0	0	0
ASV628	0	0	0	0	0	0	0	0	0	0	0	0	0	0	0	0	0	0	0	0	0	0	0	0	0	0	0	0	0	0	0	0	0	0	0	0	0	0	0	0	0	0	0	0	0	0	0	0	0
ASV629	0	0	0	0	0	0	0	0	0	0	0	0	0	0	0	0	0	0	0	0	0	0	0	0	0	0	0	0	0	0	0	0	0	0	0	0	0	0	0	0	0	0	0	7	0	0	0	0	0
ASV630	0	0	0	0	0	0	0	0	0	0	0	0	0	0	0	0	0	0	0	0	0	0	0	0	0	0	0	0	0	0	0	0	0	0	0	0	0	0	0	0	0	0	0	0	0	0	5	0	0
ASV631	0	0	0	0	0	0	0	0	0	0	0	0	0	0	0	0	0	0	0	0	0	0	0	0	0	0	0	0	0	0	0	0	0	0	0	0	0	0	0	0	0	0	0	0	0	0	0	0	0
ASV632	0	0	0	0	0	0	0	0	0	0	0	0	0	0	0	0	0	0	0	0	0	0	0	0	0	0	0	0	0	0	0	0	0	0	2	0	0	0	0	0	0	0	0	0	0	0	0	0	0
ASV633	129	68	9	0	874	54	85	71	0	56	18	123	411	60	65	0	0	0	0	0	60	130	13	0	70	3	145	548	0	0	80	57	0	22	4	0	0	0	0	0	0	17	0	46	0	0	0	0	0
ASV634	0	0	0	0	0	0	0	0	0	0	0	0	0	0	0	0	0	0	0	0	0	0	0	0	0	0	0	0	0	0	0	0	0	0	0	0	0	0	0	0	0	0	1	0	0	0	0	0	0
ASV635	0	0	0	0	0	0	0	0	0	0	0	0	0	0	0	0	0	0	0	0	0	0	0	0	0	0	0	0	0	0	0	0	0	0	0	0	0	0	0	0	0	0	0	0	0	0	0	0	0
ASV636	0	0	0	0	0	0	0	0	0	0	0	0	0	0	0	0	0	0	0	0	0	0	0	0	0	0	0	0	0	0	0	0	0	0	0	0	0	0	0	0	0	0	0	0	0	0	0	0	0
ASV637	0	0	0	0	0	0	0	0	2	228	0	0	0	0	0	128	0	0	0	0	0	0	0	149	516	0	0	0	0	0	170	0	0	150	0	0	0	0	0	0	0	0	0	67	0	0	0	0	0
ASV638	0	0	0	0	0	0	0	0	0	0	0	0	0	0	0	0	0	0	0	0	0	0	0	0	0	0	4	0	0	0	0	0	0	0	0	0	0	0	0	0	0	0	0	0	0	0	0	0	0
ASV639	0	0	0	37	8	6	9	132	27	64	0	29	17	5	15	0	0	301	320	78	74	73	150	271	323	666	143	86	341	3543	148	33	91	58	756	1045	140	1413	344	526	23	195	193	101	132	355	704	297	396
ASV640	0	0	0	0	0	0	0	0	0	0	0	0	0	0	0	0	0	0	0	0	0	23	0	0	0	0	0	0	0	0	0	0	0	0	0	0	0	0	0	0	0	0	0	0	0	0	0	0	0
ASV641	0	0	0	0	0	0	0	0	0	0	0	0	0	0	0	0	0	0	0	0	0	0	0	0	0	0	0	0	14	0	0	0	0	0	0	22	4	0	0	48	0	0	0	0	0	3	9	0	6
ASV642	0	0	0	0	0	0	0	0	0	0	0	0	0	0	0	0	0	12	24	0	0	0	0	0	0	0	0	0	0	0	0	0	0	0	0	0	0	14	0	0	0	0	0	0	0	10	0	0	4
ASV643	0	0	0	0	0	0	0	0	0	0	0	0	0	0	0	0	0	0	0	0	0	0	0	0	0	0	0	0	0	0	0	0	0	0	2	0	0	0	0	0	0	0	0	0	0	0	0	0	0
ASV644	0	0	0	2	0	0	0	0	0	0	0	0	0	0	0	0	0	0	0	0	0	0	0	0	0	0	0	0	0	0	0	0	0	0	0	0	0	0	0	0	0	0	0	0	0	0	0	0	0
ASV645	0	0	0	0	0	0	0	0	0	0	0	0	0	0	0	0	0	0	0	0	0	0	100	0	0	0	0	0	0	0	0	0	0	0	0	0	0	0	0	0	0	0	0	0	0	0	0	0	0
ASV646	0	0	89	0	0	0	0	0	0	0	16	0	1177	226	820	4	1392	51	0	0	0	0	0	0	0	0	0	0	0	0	52	180	8	0	0	6	632	158	11	11	203	934	61	17	37	0	12	16	208
ASV647	0	0	0	0	0	0	0	0	0	0	0	0	0	0	0	0	0	0	0	0	0	0	0	0	0	0	0	0	0	0	0	0	0	0	0	0	0	0	0	0	0	0	0	0	0	0	0	0	0
ASV648	0	0	0	0	0	0	0	0	0	0	0	0	0	0	0	0	0	0	0	0	0	0	0	0	0	0	0	0	0	0	0	0	0	0	0	0	0	0	0	0	0	0	0	0	0	0	0	0	0
ASV649	296	72	103	29	11	0	0	0	0	0	105	58	544	59	340	0	0	0	0	0	0	0	0	0	0	0	0	0	0	0	0	0	0	0	30	0	0	0	0	0	0	0	0	0	0	0	0	0	0
ASV650	0	0	0	0	0	0	0	0	0	0	0	0	0	6	4	0	0	0	0	0	0	0	0	95	23	0	0	0	0	0	0	0	0	0	5	0	0	0	0	0	0	0	0	0	0	0	0	0	0
ASV651	0	0	49	0	0	0	0	0	0	0	0	225	528	0	0	0	0	11	0	0	0	0	0	60	0	0	0	0	0	0	0	0	0	0	0	0	0	0	0	0	0	0	0	0	0	0	0	0	0
ASV652	0	0	0	0	0	0	30	0	0	0	0	0	0	0	0	0	0	0	0	0	0	0	0	0	0	0	0	0	0	0	0	0	0	0	0	0	0	0	0	0	0	0	0	0	0	0	0	0	0
ASV653	0	0	0	0	0	0	0	0	0	0	0	0	0	0	0	0	0	2	0	0	0	0	0	0	0	0	0	0	0	0	0	0	0	0	0	0	0	0	0	0	0	0	0	0	0	0	0	0	0
ASV654	0	0	0	0	0	0	0	0	0	0	0	0	0	0	0	0	0	0	0	0	0	0	0	0	0	0	0	0	0	0	0	0	0	0	0	47	0	0	6	0	0	0	0	0	0	0	0	0	0
ASV655	0	0	0	0	0	0	0	0	0	0	0	0	0	0	0	0	0	0	0	0	10	0	7	0	6	0	0	0	6	0	0	6	0	0	16	24	4	0	0	5	0	0	0	0	14	0	0	0	4
ASV656	0	0	0	0	0	0	0	243	19	0	0	0	0	0	0	0	0	0	0	0	0	0	0	0	0	0	0	0	0	0	0	0	0	0	0	0	0	0	0	0	0	0	0	0	0	0	0	0	0
ASV657	0	0	0	0	0	0	0	0	0	0	0	0	0	0	0	0	0	0	0	0	0	0	0	0	0	0	0	0	0	0	0	0	0	0	0	0	0	0	0	0	0	0	0	0	0	0	0	0	0
ASV658	0	0	0	0	0	0	0	0	0	0	0	0	262	0	0	0	0	0	0	0	0	0	0	0	0	0	0	0	0	0	0	0	0	0	0	0	0	0	0	0	0	0	0	0	0	0	0	0	0
ASV659	0	0	0	0	63	0	0	0	0	0	0	0	0	30	0	0	0	0	0	0	0	0	0	0	0	0	0	0	0	0	0	0	0	0	0	0	0	0	0	0	0	0	0	0	0	0	0	0	0
ASV660	0	0	128	0	0	0	0	0	0	0	125	379	1278	27	34	0	0	0	0	0	0	2	393	78	35	0	0	0	0	0	6	0	0	0	10	7	0	0	0	0	0	0	5	0	0	0	0	0	0
ASV661	0	0	0	0	0	0	0	0	0	0	0	0	0	0	0	0	0	0	0	0	0	0	0	0	0	0	0	0	0	0	0	0	0	0	0	20	0	0	0	0	0	0	0	0	0	0	0	0	0
ASV662	0	5	0	0	0	0	0	0	0	0	0	0	0	0	5	0	0	0	0	0	35	163	0	0	0	0	0	0	0	0	6	20	31	24	0	0	0	75	9	0	0	18	679	20	103	0	0	18	20
ASV663	0	0	0	0	0	0	0	0	0	0	0	0	0	0	0	0	0	0	0	0	0	0	0	0	0	0	9	0	0	0	0	0	0	0	0	0	0	0	0	0	0	0	0	0	0	0	0	0	0
ASV664	0	0	0	0	0	0	0	50	0	0	0	0	0	0	0	0	0	0	0	0	0	0	0	0	0	0	0	0	0	0	4	0	0	0	0	0	0	0	0	0	0	0	0	0	0	0	0	0	0
ASV665	0	0	0	0	0	0	0	0	0	0	0	0	0	0	0	0	0	0	68	46	0	0	0	0	0	0	0	0	0	0	0	0	0	0	0	0	0	0	0	0	0	0	0	0	0	0	0	0	0
ASV666	0	0	0	0	0	0	0	0	0	0	0	0	0	0	0	0	0	0	0	0	0	0	0	0	0	0	0	0	0	0	0	0	0	0	0	8	0	0	0	0	0	0	0	0	0	0	0	0	0
ASV667	0	0	0	0	0	0	0	0	0	0	0	0	0	0	0	0	0	0	0	0	183	0	34	0	0	0	0	0	0	0	99	44	3641	7509	0	0	0	0	0	0	2329	241	1736	66	490	0	0	0	0
ASV668	0	0	0	6	0	13	75	28	298	0	0	0	0	0	22	30	208	665	824	623	60	49	63	82	75	53	656	16	149	253	75	73	47	163	259	1630	49	611	556	210	16	298	80	35	178	596	466	712	492
ASV669	0	0	0	0	0	0	0	0	0	0	0	0	0	0	0	0	0	0	0	0	0	0	0	0	0	0	0	0	0	0	0	0	0	0	0	0	0	0	0	0	0	0	0	0	0	0	0	0	0
ASV670	0	0	0	0	0	0	0	0	0	0	0	0	0	0	0	0	0	0	0	0	0	0	0	0	0	0	0	0	0	0	0	0	0	0	0	0	0	0	0	0	0	0	0	0	0	0	0	0	0
ASV671	0	0	0	0	0	0	0	0	0	0	0	0	0	0	0	0	0	0	0	0	8	0	0	0	0	0	0	0	0	0	0	0	0	0	0	0	0	0	0	0	0	0	0	0	0	0	0	0	0
ASV672	0	0	0	0	0	0	0	0	0	0	0	0	0	0	0	0	0	0	0	0	0	0	0	0	0	15	0	0	0	0	0	0	0	0	0	0	0	0	0	0	0	0	0	0	0	0	0	0	0
ASV673	0	0	0	0	0	0	0	0	0	0	0	0	0	0	0	0	0	0	0	0	0	0	0	0	0	0	0	0	0	0	0	0	0	0	0	0	0	0	0	0	0	0	0	0	0	0	0	0	0
ASV674	0	0	0	2	0	0	0	0	0	0	0	0	0	0	0	0	0	0	0	0	0	0	0	0	0	0	0	0	0	0	0	0	0	0	0	0	0	0	0	0	0	0	0	0	0	0	0	0	0
ASV675	0	0	21	0	0	0	0	0	0	0	5	7	237	0	20	0	0	0	0	0	5	0	35	0	0	0	0	0	0	0	0	0	0	0	0	0	0	0	0	0	0	0	0	0	0	0	0	0	0
ASV676	0	0	3	0	0	0	0	0	0	0	3	0	0	0	10	0	0	0	0	0	0	0	0	397	11	7	0	0	0	0	3	0	0	0	1	0	0	0	0	0	0	0	0	0	0	0	0	0	0
ASV677	0	9	0	0	0	0	0	0	0	0	0	0	0	0	0	0	523	8	0	0	0	0	0	0	6	0	0	0	0	0	0	0	0	0	0	0	0	0	0	0	0	0	0	0	0	0	0	0	0
ASV678	0	0	0	0	0	0	0	0	0	0	0	0	0	0	0	0	0	0	82	0	0	0	0	0	0	0	0	0	0	0	0	0	0	0	0	0	0	0	0	0	0	0	0	0	0	0	0	0	0
ASV679	0	0	0	0	0	0	0	0	0	0	0	0	0	0	49	0	0	0	0	0	0	0	0	21	0	0	0	0	0	0	0	0	0	0	0	0	0	0	0	0	0	0	0	0	0	0	0	0	0
ASV680	0	0	0	0	0	22	0	0	0	0	0	0	0	0	0	0	0	0	0	0	0	86	57	282	44	0	0	0	0	0	32	19	0	84	405	0	0	0	0	0	18	0	41	0	118	0	0	0	0
ASV681	0	0	0	0	0	0	0	0	0	0	0	0	0	0	0	0	0	0	0	0	0	0	0	0	0	0	0	0	0	357	0	0	0	0	0	0	0	0	0	0	0	0	0	0	0	0	0	0	0
ASV682	0	0	0	0	0	0	0	0	0	0	0	0	0	0	0	0	0	0	0	0	0	0	0	0	0	0	0	0	0	0	0	0	0	0	0	0	0	0	0	0	0	0	0	0	0	0	0	0	0
ASV683	0	2	0	0	0	0	0	0	0	0	0	0	0	0	0	0	0	0	0	0	0	0	0	0	0	0	0	0	0	0	0	0	0	0	0	0	0	0	0	0	0	0	0	0	0	0	0	0	0
ASV684	0	0	58	0	0	0	0	0	667	0	107	267	23	30	255	16	0	0	0	0	0	163	78	296	236	33	0	11	0	0	42	0	0	15	268	0	0	0	0	0	0	0	8	0	0	0	0	0	0
ASV685	0	0	0	0	0	0	3102	0	5	0	0	0	0	0	0	0	0	42	0	0	0	0	0	0	0	0	0	0	0	0	0	0	0	0	0	0	0	0	0	0	0	0	0	0	0	0	0	0	0
ASV686	0	0	0	0	0	0	0	0	0	0	0	0	0	0	0	0	0	0	0	0	0	0	0	0	0	0	0	210	0	0	0	0	0	0	0	0	0	0	0	0	0	0	0	0	0	0	0	0	0
ASV687	0	0	0	0	0	0	0	0	40	887	0	0	0	0	0	0	944	0	0	0	0	0	0	0	0	0	0	31	0	62	0	0	0	0	0	0	0	0	0	0	0	0	0	0	0	0	0	0	0
ASV688	0	0	0	0	0	0	0	0	0	0	0	0	0	0	0	0	0	0	0	0	0	0	0	0	0	0	0	0	0	0	0	0	0	0	0	0	0	0	0	0	0	0	0	0	0	0	0	0	0
ASV689	0	0	0	0	0	0	0	243	0	0	0	0	0	0	0	0	0	17	0	0	0	0	8	0	0	0	0	0	7	0	0	0	0	0	0	0	0	212	32	0	0	0	0	0	0	40	46	34	12
ASV690	0	0	0	0	0	0	90	0	0	0	0	0	0	0	0	0	0	13	0	0	0	0	0	0	0	0	0	0	0	0	0	0	0	0	0	0	0	0	0	0	0	0	0	0	0	0	0	0	0
ASV691	381	0	0	0	0	0	29	96	3	2539	4	43	0	12	0	0	0	66	155	0	0	31	0	0	0	0	0	0	5	0	0	0	0	0	0	0	20	0	0	92	0	0	0	0	0	0	0	0	0
ASV692	0	0	0	0	0	0	0	0	0	0	0	0	0	0	0	0	0	0	0	0	0	24	0	0	0	0	0	0	0	0	0	0	0	0	0	0	0	0	0	0	0	0	0	0	0	0	0	0	0
ASV693	0	0	0	0	0	0	0	0	0	0	0	0	0	0	0	0	0	0	0	0	0	0	0	0	0	0	0	0	0	98	0	0	0	0	0	0	0	0	0	0	0	0	0	0	0	0	0	0	0
ASV694	0	0	0	0	0	0	19	13	0	0	0	0	0	0	0	0	0	38	0	0	0	21	0	0	11	13	22	0	0	0	0	0	0	0	0	0	0	0	0	0	0	0	0	0	0	0	0	0	0
ASV695	0	0	0	0	0	0	0	0	0	0	0	0	0	0	0	0	0	0	0	0	0	0	0	0	0	0	0	0	0	0	0	0	0	0	0	0	0	0	0	0	0	0	0	0	0	31	13	0	0
ASV696	0	0	0	0	0	0	0	0	0	0	0	0	0	0	0	0	0	0	0	0	0	0	0	0	0	0	0	0	0	0	0	0	0	0	0	15	0	0	0	0	0	0	0	0	0	0	0	0	0
ASV697	0	0	0	0	0	0	0	0	0	0	0	0	35	2	0	0	0	0	0	0	0	0	0	0	0	0	0	0	0	0	0	0	0	0	0	0	0	0	0	0	0	0	0	0	0	0	0	0	0
ASV698	0	15	0	0	0	0	0	0	0	0	0	0	0	0	0	0	0	0	0	0	0	0	0	0	0	0	0	0	0	0	0	0	0	0	0	0	0	0	0	0	0	0	0	0	0	0	0	0	0
ASV699	0	0	0	0	0	0	28	0	0	0	0	0	0	0	0	0	0	0	0	0	0	0	0	0	0	0	0	0	0	0	0	0	0	0	0	0	0	0	0	0	0	0	0	0	0	0	0	0	0
ASV700	0	0	0	0	0	0	0	0	0	0	0	0	0	0	0	0	0	0	0	0	0	20	19	32	42	0	0	0	0	0	0	0	6	0	27	0	0	0	0	0	0	0	0	0	0	0	0	0	0
ASV701	0	0	0	0	0	0	0	0	0	0	0	0	26	0	0	0	0	0	0	0	0	0	0	0	0	0	0	0	0	0	0	0	0	0	0	0	0	0	0	0	0	0	0	0	0	0	0	0	0
ASV702	0	0	0	0	0	0	0	0	0	0	0	0	0	0	0	0	0	0	9	0	0	0	0	0	0	0	0	0	0	0	0	0	0	0	0	0	0	0	0	0	0	0	0	0	0	0	0	0	0
ASV703	0	0	359	0	0	0	0	0	0	0	168	0	0	0	0	0	0	0	0	0	0	0	0	0	0	0	0	0	0	0	0	0	0	0	0	0	0	162	0	0	0	0	0	0	89	0	78	458	1585
ASV704	0	0	0	0	0	0	0	0	0	0	0	0	0	0	0	0	0	0	9	0	0	0	0	0	0	0	0	0	0	0	0	0	14	0	0	0	0	0	0	0	0	0	0	0	0	0	0	0	0
ASV705	0	0	0	0	0	0	0	0	0	0	0	0	0	0	0	0	0	0	0	0	0	0	0	0	0	0	0	0	0	0	0	0	0	0	0	22	0	0	0	0	0	0	0	0	0	0	0	0	0
ASV706	545	70	47	37	151	0	0	58	0	0	0	0	14	56	641	0	0	0	0	6	7	25	8	0	8	0	8	0	0	0	11	29	0	25	0	0	0	0	21	12	0	0	0	0	5	0	15	0	8
ASV707	4101	139	144	490	103	1873	231	1334	798	0	185	134	608	64	1367	914	905	165	196	65	0	0	0	27	25	0	76	302	62	0	14	0	0	0	6	0	0	0	0	0	0	0	0	0	0	0	0	0	0
ASV708	0	0	0	0	0	0	0	0	2	0	0	0	0	0	0	0	0	0	0	0	0	0	0	0	0	0	0	0	0	0	0	0	0	0	0	0	0	0	0	0	0	0	0	0	0	0	0	0	0
ASV709	0	0	0	0	0	0	0	0	0	0	0	0	0	0	0	0	0	23	0	0	0	0	0	0	0	0	0	0	0	0	0	0	0	0	0	0	0	0	0	0	0	0	0	0	0	0	0	0	0
ASV710	0	0	0	0	0	0	0	0	3	0	0	0	0	0	0	0	0	0	0	0	0	0	0	0	0	0	0	0	0	0	0	0	0	0	0	0	0	0	0	0	0	0	0	0	0	0	0	0	0
ASV711	0	0	0	0	0	0	0	0	0	0	1354	6502	150	0	49	0	0	0	0	0	472	0	26	0	0	0	0	0	0	0	109	126	29	15	0	129	134	26	0	0	4461	107	2568	0	0	18	5	116	264
ASV712	0	0	0	0	0	0	0	0	0	0	0	0	0	0	0	0	0	0	0	0	0	0	0	0	0	0	0	0	0	0	0	0	0	0	0	0	0	0	0	0	0	0	0	0	0	0	0	0	0
ASV713	0	0	0	0	0	0	32	0	0	0	0	0	0	0	0	0	0	0	0	0	0	0	0	0	0	0	0	0	0	0	0	0	0	0	0	0	0	0	0	0	0	0	0	0	0	0	0	0	0
ASV714	0	0	0	0	0	0	0	0	0	0	0	0	0	0	0	0	0	0	0	0	0	0	0	0	0	0	18	0	0	0	0	0	0	0	0	0	0	0	0	0	0	0	0	0	0	0	0	0	0
ASV715	0	0	0	0	0	0	0	0	0	0	0	0	0	0	0	0	0	0	0	0	0	0	0	0	0	0	0	0	0	0	0	0	0	0	0	0	0	0	0	0	88	6	87	0	0	0	0	0	0
ASV716	0	0	0	0	0	0	0	0	0	0	0	0	0	0	0	0	0	0	0	0	0	0	34	0	0	0	0	0	0	0	0	0	0	0	0	0	0	0	0	0	0	0	0	0	0	0	0	0	0
ASV717	0	0	0	0	0	0	0	0	0	0	0	0	0	0	0	0	0	0	0	0	0	0	0	0	0	0	0	0	0	0	0	0	0	0	0	12	0	0	0	0	0	0	0	0	0	0	0	0	0
ASV718	0	0	0	0	0	0	0	0	0	0	0	0	0	0	0	0	0	0	0	5	0	0	92	0	0	0	13	0	0	0	0	0	0	0	0	0	0	0	0	0	0	0	0	0	0	0	0	0	0
ASV719	0	0	0	0	0	0	0	0	0	143	0	0	0	0	0	0	0	0	0	0	0	0	0	0	0	0	0	0	0	0	0	0	0	0	0	0	0	0	0	0	0	0	0	0	0	0	0	0	0
ASV720	0	0	0	0	0	18	0	0	0	0	0	0	0	0	0	0	0	0	0	0	0	0	0	0	0	0	0	0	0	0	0	0	0	0	0	0	0	0	0	0	0	0	0	0	0	0	0	0	0
ASV721	0	0	0	0	0	0	14	193	0	0	0	0	0	0	0	0	0	0	0	0	0	0	0	0	0	0	0	0	0	0	0	0	0	0	0	0	0	0	0	0	0	0	0	0	0	0	0	0	0
ASV722	0	0	0	0	0	0	0	0	0	0	0	0	1	0	0	0	0	0	0	0	0	0	0	0	0	8	0	0	0	0	0	0	0	0	0	550	0	0	0	0	0	0	0	0	0	0	0	0	0
ASV723	0	0	0	0	0	0	0	0	0	0	0	0	0	0	0	0	0	0	0	0	0	0	2	0	0	0	0	0	0	0	0	0	0	0	0	8	0	12	12	0	0	0	0	0	0	0	0	7	0
ASV724	0	0	0	0	0	0	0	0	0	0	0	0	0	0	0	0	0	0	0	0	0	0	0	0	0	0	0	0	22	0	0	0	0	0	0	31	0	0	0	0	0	0	0	0	0	0	0	0	0
ASV725	0	0	0	0	0	0	0	0	0	0	0	0	0	0	0	0	908	0	0	0	0	0	0	0	0	0	4	0	0	0	0	0	0	0	0	0	0	0	0	0	0	0	0	0	0	0	0	0	0
ASV726	98	0	0	0	0	0	0	15	218	4308	0	0	0	0	0	0	2647	0	0	0	0	0	0	0	0	0	0	0	0	0	0	0	0	0	0	0	0	0	0	765	0	0	0	0	0	0	0	0	0
ASV727	0	0	0	0	0	0	0	0	0	0	2	0	0	0	0	0	0	0	0	0	0	0	0	0	0	0	0	0	0	0	0	0	0	0	0	0	0	0	0	0	0	0	0	0	0	0	0	0	0
ASV728	0	0	0	0	0	0	0	0	0	0	0	0	0	0	0	0	0	0	0	0	0	0	0	0	0	0	0	0	0	0	0	0	0	0	0	157	0	0	0	0	0	0	0	0	0	0	0	0	0
ASV729	35	0	0	0	0	0	0	14	0	0	0	0	13	0	57	0	0	0	0	0	0	19	0	0	0	0	0	0	0	0	0	0	0	0	0	0	0	0	0	0	0	0	0	0	0	0	0	0	0
ASV730	0	0	0	0	0	0	0	0	0	0	0	0	0	0	0	0	0	0	0	0	0	0	0	0	0	15	0	0	0	0	0	0	0	0	0	0	0	0	0	0	0	0	0	0	0	0	0	0	0
ASV731	0	0	0	0	0	0	0	0	0	0	0	0	0	0	0	0	0	0	0	0	11	20	9	0	0	0	0	0	0	0	0	0	0	0	0	60	0	0	0	0	0	0	0	0	0	0	0	0	0
ASV732	0	0	0	0	0	0	0	0	0	0	0	0	0	0	0	0	0	0	0	0	0	0	0	0	0	0	0	0	0	0	0	0	0	0	0	0	0	0	0	0	0	0	0	0	0	0	0	0	0
ASV733	0	0	0	0	0	0	50	0	0	0	0	0	0	0	0	0	0	0	0	0	0	0	0	0	0	0	0	0	0	0	0	0	0	0	0	0	0	0	0	0	0	0	0	0	0	0	0	0	0
ASV734	0	0	0	0	0	0	0	0	0	189	0	0	0	0	0	0	0	0	14	0	0	0	0	0	0	0	0	0	0	0	0	0	0	0	0	0	0	0	0	0	0	0	0	0	0	0	0	0	0
ASV735	0	0	0	0	0	0	16	0	0	0	0	214	0	0	0	0	0	0	0	0	0	0	0	0	0	0	0	0	0	0	0	0	0	0	0	0	0	0	0	0	0	0	0	0	9	0	0	0	0
ASV736	0	0	0	0	0	0	0	10	0	0	0	0	0	0	0	0	103	28	86	0	0	0	0	0	0	0	0	0	0	0	0	0	0	0	0	0	0	0	0	0	0	0	0	0	0	0	0	0	0
ASV737	0	0	0	0	0	0	0	0	0	0	0	0	0	0	0	0	0	0	0	0	0	0	0	0	0	0	0	0	0	0	0	0	0	3	0	0	0	0	0	0	0	0	0	0	0	0	0	0	0
ASV738	0	0	0	0	0	0	0	0	0	0	0	0	0	0	0	0	0	0	0	0	0	0	0	0	0	0	0	0	0	45	0	0	0	0	0	0	0	0	0	0	0	0	0	0	0	0	0	0	0
ASV739	0	0	0	0	0	0	35	10	0	0	0	0	0	0	0	0	0	17	0	0	0	0	0	0	0	0	0	0	6	644	0	0	0	0	0	0	0	0	0	0	2	0	0	0	0	0	0	0	0
ASV740	0	0	0	0	0	0	0	0	0	0	0	0	0	0	0	0	0	0	0	0	0	0	0	0	0	0	0	4	0	0	0	0	0	0	0	0	0	0	0	0	0	0	0	0	0	0	0	0	0
ASV741	0	0	0	5	0	0	0	0	36	0	0	0	0	0	0	16	0	30	70	17	0	0	0	73	62	245	56	0	92	0	18	0	0	0	59	451	0	75	77	5	0	0	0	0	0	80	19	61	56
ASV742	0	0	0	0	0	0	0	16	0	0	0	0	0	0	0	0	0	0	0	0	0	0	0	0	0	0	0	0	0	0	0	0	0	0	0	0	0	0	0	0	0	0	0	0	0	0	0	0	0
ASV743	0	0	0	0	0	0	0	0	0	0	0	103	0	0	0	0	0	0	0	0	0	0	0	0	0	0	0	0	0	0	0	0	0	0	0	0	0	0	0	0	0	0	0	0	0	0	0	0	0
ASV744	0	3	0	0	0	0	0	0	0	0	0	0	0	0	0	0	0	0	0	0	0	0	0	0	0	0	0	0	0	0	0	0	0	0	0	0	0	0	0	0	0	0	0	0	0	0	0	0	0
ASV745	0	0	0	0	0	0	0	0	0	0	0	0	0	0	0	0	0	0	0	0	0	0	0	0	0	0	0	0	0	0	0	0	0	0	0	12	0	0	0	0	0	0	0	0	0	0	0	0	0
ASV746	0	0	0	0	0	0	0	0	0	0	0	0	0	0	0	0	0	0	0	0	0	0	0	0	0	0	12	0	0	0	0	0	0	0	0	0	0	0	0	0	0	0	0	0	0	0	0	0	0
ASV747	0	0	0	0	0	0	0	0	0	0	0	0	53	0	0	0	0	0	0	0	0	0	0	0	0	0	0	0	0	0	0	0	0	0	0	0	0	0	0	0	0	0	0	0	0	0	0	0	0
ASV748	0	0	0	0	0	0	0	0	0	2264	0	0	0	0	0	0	0	0	0	0	0	0	0	0	0	0	0	0	0	0	0	0	0	0	0	0	0	0	0	0	0	0	0	0	0	0	0	0	0
ASV749	0	0	0	0	0	0	0	0	0	0	0	0	0	0	0	0	0	0	0	0	0	109	6	0	0	0	0	0	0	0	0	0	0	0	0	0	0	0	0	0	0	0	0	0	0	0	0	0	0
ASV750	0	0	0	0	0	0	0	0	0	0	0	0	0	0	0	0	0	0	0	0	0	0	0	0	0	0	0	0	0	0	0	0	0	0	0	0	0	0	0	0	0	0	0	0	0	0	0	0	0
ASV751	0	0	0	0	0	0	0	0	0	0	0	0	0	0	0	0	0	0	0	0	0	0	0	0	0	0	0	0	0	0	0	0	0	0	0	0	0	0	0	0	0	0	0	0	0	0	0	0	0
ASV752	0	0	0	0	0	0	144	0	0	0	0	0	63	0	0	0	0	0	0	0	3	19	140	0	0	0	0	0	0	0	0	0	0	0	0	0	0	0	0	0	0	0	0	0	0	0	0	0	0
ASV753	0	0	0	0	0	0	0	0	0	0	0	0	0	0	0	0	0	19	0	0	0	0	0	0	0	0	0	0	0	0	0	0	0	0	0	0	0	0	0	0	0	0	0	0	0	0	0	0	0
ASV754	0	0	0	0	0	0	0	0	0	0	0	12	426	0	0	0	0	0	0	0	0	0	0	0	0	29	0	0	0	0	0	0	0	0	0	0	0	0	0	11	0	0	0	0	0	0	70	0	0
ASV755	0	0	0	0	0	0	0	0	0	0	0	0	0	0	0	0	0	0	0	0	0	0	0	0	0	0	0	0	0	0	0	0	0	0	0	0	0	0	0	31	0	0	0	0	0	0	0	0	0
ASV756	0	0	0	0	0	0	0	0	0	0	0	0	0	0	0	103	0	0	0	0	0	0	0	0	0	0	0	0	0	0	0	0	0	0	0	0	0	0	0	0	0	0	0	0	0	0	0	0	0
ASV757	0	0	0	0	0	0	0	0	0	0	0	0	0	0	0	0	0	0	0	0	0	19	0	0	0	0	0	0	0	0	0	0	0	0	0	0	0	0	0	0	0	0	0	0	0	0	0	0	0
ASV758	0	0	0	0	0	0	0	0	0	0	0	0	0	0	0	0	0	0	0	0	0	0	0	0	0	0	17	0	0	0	0	0	0	0	0	54	0	71	0	27	0	0	0	0	0	0	0	0	20
ASV759	0	0	0	0	0	0	0	0	0	0	0	0	0	0	0	0	0	0	0	0	0	0	0	0	0	0	0	0	0	0	0	0	0	0	0	0	0	0	0	0	0	0	0	0	0	0	0	0	0
ASV760	0	0	0	0	0	0	0	0	0	0	0	0	0	0	0	0	0	0	0	0	0	0	0	0	0	0	0	0	0	0	0	0	0	0	0	0	0	0	0	0	0	0	0	0	0	0	0	0	0
ASV761	0	0	0	0	0	0	0	0	0	0	0	0	0	0	0	0	0	0	0	0	0	0	0	0	0	0	0	0	0	0	0	0	0	0	2	0	0	0	0	0	0	0	0	0	0	0	0	0	0
ASV762	2249	158	47	36	3917	195	1016	310	0	36	92	196	1258	209	195	22	59	84	258	240	159	116	12	52	110	10	4687	322	0	0	144	45	51	61	28	0	0	0	13	0	0	45	164	73	53	0	0	0	0
ASV763	0	0	0	0	0	0	0	0	0	0	0	0	0	0	0	0	49	0	0	0	0	0	0	0	0	0	0	0	0	0	0	0	0	0	0	0	0	0	0	0	0	0	0	0	0	0	0	0	0
ASV764	0	0	0	0	0	0	0	0	0	0	0	0	0	0	0	0	0	0	0	0	0	0	0	0	0	0	0	0	0	0	0	0	0	0	0	0	0	0	0	0	0	0	0	0	21	0	0	0	0
ASV765	0	0	0	0	0	0	26	0	0	0	0	0	0	0	0	0	0	0	47	0	0	0	0	0	0	0	328	0	0	0	0	0	0	0	0	0	0	0	0	0	0	0	0	0	0	0	0	0	0
ASV766	0	0	0	0	0	0	0	0	0	0	0	0	0	0	0	0	0	0	0	0	0	0	0	0	0	0	0	0	0	129	0	0	0	0	0	0	0	0	0	0	0	0	0	0	0	0	0	0	0
ASV767	0	0	0	0	0	0	0	0	0	0	0	0	0	0	0	0	0	0	0	0	0	0	0	0	11	0	0	0	0	0	0	0	0	0	0	0	0	0	0	0	0	0	0	0	0	0	0	0	0
ASV768	0	0	0	0	0	0	0	0	0	0	0	0	0	0	0	0	0	0	0	0	0	0	0	0	0	0	0	0	0	213	0	0	0	0	0	0	0	0	0	0	0	0	0	0	0	0	0	0	0
ASV769	0	0	0	0	0	0	0	0	0	0	0	0	0	0	0	0	0	0	0	32	0	0	0	0	0	0	0	0	0	0	0	0	0	0	0	0	0	0	0	0	0	0	0	0	0	0	0	0	0
ASV770	0	0	0	0	0	0	407	47	0	0	0	0	126	0	0	0	0	0	0	0	0	0	29	0	0	0	239	0	0	0	0	0	0	0	0	0	0	0	0	0	0	0	0	0	0	0	0	0	0
ASV771	0	0	0	0	0	0	0	0	34	0	0	0	0	0	0	0	0	0	0	0	24	20	115	459	32	62	0	0	52	0	8	17	0	19	36	90	0	0	0	6	0	14	0	0	25	2	0	0	14
ASV772	0	0	0	0	0	3	0	0	0	0	0	0	0	0	0	0	0	0	0	0	0	0	0	0	0	0	0	0	0	0	0	0	0	0	0	0	0	0	0	0	0	0	0	0	0	0	0	0	0
ASV773	0	0	0	0	0	0	0	0	0	0	0	0	0	0	0	0	0	0	0	0	0	0	0	0	0	0	0	0	0	0	0	0	0	0	0	0	0	0	0	8	0	0	0	0	0	0	0	0	0
ASV774	0	0	308	0	0	0	0	0	11	0	517	759	954	74	380	0	0	0	0	0	0	0	88	51	55	0	41	0	0	0	0	0	0	0	14	0	0	0	0	0	0	0	0	0	0	0	0	0	0
ASV775	0	0	0	0	0	0	0	0	0	0	0	0	0	0	0	0	0	0	0	0	0	0	0	0	0	0	0	0	0	0	0	0	0	0	0	0	0	0	0	0	0	0	0	0	4	0	0	0	0
ASV776	0	0	0	0	0	0	0	324	0	0	0	0	0	0	0	0	0	0	0	0	0	0	0	0	0	0	0	0	0	0	0	0	0	0	0	0	0	0	0	0	0	0	0	0	0	0	0	0	0
ASV777	0	0	0	0	0	0	0	0	0	0	0	0	0	0	0	0	0	0	0	0	0	0	0	0	0	0	0	0	0	0	0	0	0	0	0	0	0	0	0	0	0	0	0	0	0	0	0	0	11
ASV778	0	0	0	0	0	0	0	0	0	0	0	0	0	0	0	0	0	0	0	0	0	0	0	0	0	0	0	0	0	0	0	0	0	0	0	0	0	0	0	0	0	0	0	0	0	0	0	0	0
ASV779	0	0	0	0	0	0	0	322	0	0	0	0	0	0	0	0	0	0	0	0	0	0	0	0	0	0	0	0	0	0	0	0	0	0	0	0	0	0	0	0	0	0	0	0	0	0	0	0	0
ASV780	0	0	0	0	0	0	0	0	0	0	0	0	0	0	0	0	0	19	0	0	0	0	0	0	0	0	0	0	0	0	0	0	0	0	0	0	0	0	0	0	0	0	0	0	0	0	0	0	0
ASV781	0	0	0	0	0	0	0	0	18	0	0	0	0	0	0	0	0	0	0	0	0	0	0	0	0	0	0	0	0	0	0	0	0	0	0	0	0	0	0	0	0	0	0	0	0	0	0	0	0
ASV782	0	0	0	0	0	373	0	0	0	0	0	0	0	0	0	0	0	0	0	0	0	0	0	0	0	0	0	14	0	0	0	0	0	0	0	0	0	0	0	0	0	0	0	0	0	0	0	0	0
ASV783	0	0	0	0	0	0	0	0	0	0	0	0	0	0	0	0	0	0	0	0	0	0	0	0	0	0	0	0	0	0	0	0	0	0	0	0	0	11	0	0	0	0	0	0	0	0	0	0	0
ASV784	0	0	0	0	0	0	0	0	0	0	0	0	0	0	0	0	0	0	0	0	0	0	0	0	13	0	0	0	0	0	0	0	0	0	0	0	0	0	0	0	0	0	0	0	0	0	0	0	0
ASV785	0	0	0	0	0	0	0	0	0	0	0	0	0	0	0	40	0	0	0	0	0	0	0	0	0	15	0	0	0	0	0	0	0	0	0	0	0	0	0	0	0	0	0	0	0	0	0	0	0
ASV786	0	0	0	0	0	0	0	0	0	0	0	0	0	0	0	0	0	0	0	0	0	0	0	0	0	0	0	0	0	0	0	0	0	0	0	302	0	0	0	0	0	0	0	0	0	0	0	0	0
ASV787	0	0	0	0	0	0	0	0	4	0	0	0	0	0	0	0	0	0	0	0	0	0	0	0	0	0	0	0	0	0	0	0	0	0	0	0	0	0	0	0	0	0	0	0	0	0	0	0	0
ASV788	0	0	0	0	0	0	0	0	0	0	0	15	0	0	0	0	0	0	0	0	0	0	0	0	0	0	10	0	0	0	0	0	0	0	0	0	0	0	0	0	0	0	0	0	0	0	0	0	0
ASV789	0	0	13	2	0	0	0	0	0	0	62	173	0	12	34	0	0	0	0	0	0	0	0	0	0	0	0	0	0	0	0	0	0	0	0	0	0	0	0	0	0	0	0	0	0	0	0	0	0
ASV790	0	0	0	0	0	0	0	0	46	0	0	0	0	0	0	0	0	0	0	0	0	0	0	0	0	0	0	0	0	0	0	0	0	0	0	3	0	0	0	0	0	0	0	0	0	0	0	0	0
ASV791	0	0	0	0	0	0	0	0	0	0	0	0	0	0	0	0	0	0	0	0	0	0	0	0	0	0	0	0	0	1101	0	0	0	0	0	0	0	0	0	0	0	0	0	0	0	0	0	0	0
ASV792	0	0	0	0	0	0	0	0	0	0	0	0	0	0	0	0	0	0	0	0	0	0	0	0	0	0	0	0	0	0	2	0	0	0	0	0	0	0	0	0	0	0	0	0	0	0	0	0	0
ASV793	0	0	0	0	0	0	0	0	0	0	0	0	0	0	0	0	0	0	0	0	0	0	0	0	0	0	5	0	0	0	0	0	0	0	0	0	0	0	0	0	0	0	0	0	0	0	0	0	0
ASV794	0	0	0	0	0	0	0	0	0	0	0	0	0	0	0	0	0	0	0	0	0	0	0	0	0	0	0	0	0	0	390	81	159	0	0	0	22299	803	616	4787	132	89	385	0	0	2180	2719	50	684
ASV795	0	0	0	0	0	0	0	0	2	0	0	0	0	0	0	0	0	0	0	0	0	0	0	0	0	0	0	0	0	0	0	0	0	0	0	0	0	0	0	0	0	0	0	0	0	0	0	0	0
ASV796	0	0	0	0	0	0	0	0	0	0	0	0	0	0	0	0	0	0	0	0	0	0	0	0	0	76	0	0	0	0	0	0	0	0	0	90	0	0	0	0	0	0	0	0	0	0	0	0	0
ASV797	0	0	0	0	0	0	0	0	3	0	0	0	0	0	0	0	0	0	0	0	0	0	0	0	0	0	0	0	0	0	0	0	0	0	0	0	0	0	0	0	0	0	0	0	0	0	0	0	0
ASV798	0	0	0	0	0	0	0	0	0	0	0	0	0	0	0	0	0	0	0	0	0	0	0	0	0	0	0	0	0	0	0	0	0	0	0	0	0	0	0	0	0	0	0	0	0	0	0	0	0
ASV799	0	0	0	0	0	0	0	59	0	0	0	0	0	0	0	0	0	0	0	0	0	0	0	0	0	4	0	0	0	0	0	0	0	0	0	0	0	0	0	0	0	0	0	0	0	0	0	0	0
ASV800	0	0	0	0	0	0	0	0	0	0	0	0	0	0	0	0	0	0	0	0	0	0	0	0	0	0	0	0	0	0	0	0	0	0	0	37	0	0	0	0	0	0	0	0	0	0	0	0	0
ASV801	0	0	0	0	0	0	0	0	0	0	0	0	0	0	0	0	99	0	0	0	0	0	0	0	0	0	0	0	0	0	0	0	0	0	0	0	0	0	0	0	0	0	0	0	0	0	0	0	0
ASV802	0	0	0	0	5	9	68	0	0	0	0	0	0	0	0	0	0	10	0	0	0	0	0	0	0	0	0	0	0	70	0	0	0	0	9	0	0	0	0	0	0	0	0	0	0	0	0	0	0
ASV803	0	0	2	0	0	0	0	0	0	0	0	0	0	0	0	0	0	0	0	0	0	47	0	0	0	0	0	0	0	0	0	0	0	0	0	0	0	0	0	0	0	0	0	17	0	0	0	0	0
ASV804	0	0	0	0	0	0	0	0	0	0	0	0	0	5	0	0	0	0	0	0	0	0	0	0	0	0	0	0	0	0	0	0	0	0	0	0	0	0	0	0	0	0	0	0	0	0	0	0	0
ASV805	0	0	0	0	0	0	0	0	0	0	0	0	0	0	0	0	0	0	0	0	3	0	0	0	0	0	0	0	0	0	0	0	0	0	0	0	0	0	0	0	0	0	0	0	0	0	0	0	0
ASV806	0	0	0	0	0	0	0	24	0	0	0	0	0	0	0	0	0	0	0	0	0	0	0	0	0	0	0	0	0	0	0	0	0	0	0	0	0	0	0	0	0	0	0	0	0	0	0	0	0
ASV807	0	0	0	0	0	0	0	0	0	0	0	0	0	0	0	0	0	0	0	0	0	0	0	0	0	0	0	1003	0	0	0	0	0	0	0	0	0	0	0	0	0	0	0	0	0	0	0	0	0
ASV808	0	0	0	0	0	0	0	0	0	0	0	0	0	0	0	0	0	0	0	0	0	0	0	0	0	204	0	0	0	0	0	0	0	0	0	0	0	0	0	0	0	0	0	0	0	0	0	0	0
ASV809	0	0	0	0	0	0	0	0	0	0	0	0	0	0	0	0	0	0	0	0	0	0	0	0	0	0	0	0	0	53	0	0	0	0	0	0	0	0	0	0	0	0	0	0	0	0	0	0	0
ASV810	0	0	0	0	0	0	0	0	0	0	0	0	0	0	0	0	0	0	0	0	0	0	0	0	5	0	0	0	0	0	0	0	0	0	0	0	0	0	0	0	0	0	0	0	0	0	0	0	0
ASV811	0	0	0	0	0	0	0	11	0	0	0	0	0	0	0	0	0	0	0	0	0	0	0	0	0	0	0	0	0	0	0	0	0	0	0	0	0	0	0	0	0	0	0	0	0	0	0	0	0
ASV812	0	0	0	0	0	0	0	0	0	0	0	0	0	0	0	0	0	0	0	0	0	0	0	0	0	0	0	0	0	0	0	0	0	0	15	0	0	0	0	0	0	0	0	4	0	0	0	0	0
ASV813	0	0	0	0	0	0	0	0	0	0	0	0	0	0	0	0	0	0	0	0	0	0	0	21	0	0	0	0	0	0	0	0	0	0	0	0	0	0	0	0	0	0	0	0	0	0	0	0	0
ASV814	0	0	0	0	0	0	0	0	0	0	0	0	0	0	0	0	0	0	0	0	0	0	0	0	0	0	0	0	0	0	0	0	0	0	0	0	0	0	0	0	0	0	3	0	0	0	0	0	0
ASV815	0	0	0	6	0	0	0	0	0	0	0	0	0	0	0	0	0	0	0	0	5	0	10	0	37	0	1339	0	0	0	0	0	0	0	0	0	0	0	0	0	0	17	22	8	0	0	0	0	0
ASV816	0	0	0	0	0	0	0	0	0	0	0	0	0	0	0	0	0	0	0	0	0	0	0	0	0	18	0	0	0	0	0	0	0	0	0	0	0	0	0	0	0	0	0	6	0	0	0	0	0
ASV817	0	0	0	0	0	0	0	0	0	0	0	0	0	0	0	0	0	0	0	0	0	0	0	21	0	0	0	0	0	0	0	0	0	0	0	0	0	0	0	0	0	0	0	0	0	0	0	0	0
ASV818	0	0	0	0	0	0	0	0	848	0	0	0	0	0	0	28	0	0	0	0	0	0	0	0	0	0	0	0	0	0	0	0	0	0	0	0	0	0	0	0	0	0	0	0	0	0	0	0	0
ASV819	0	0	13	0	0	0	0	0	0	0	31	0	130	26	258	0	0	0	0	0	14	0	12	0	0	0	0	0	0	0	0	5	0	10	0	0	0	0	0	0	0	5	0	7	0	0	0	0	0
ASV820	0	0	0	0	0	0	0	0	0	0	0	0	0	0	0	0	0	0	0	0	0	4	0	0	0	0	0	0	0	0	0	0	0	0	0	0	0	0	0	0	0	0	0	0	0	0	0	0	0
ASV821	0	0	0	0	0	0	0	0	0	0	0	0	0	0	0	0	0	0	0	0	0	0	0	0	0	0	0	0	0	0	0	0	0	0	0	0	0	0	0	0	0	0	0	0	0	0	0	0	0
ASV822	0	0	0	0	0	0	0	0	0	0	0	0	0	0	0	0	0	0	0	0	0	0	0	0	0	0	0	0	0	0	0	0	0	0	0	0	0	0	0	2	0	0	0	0	0	0	0	0	0
ASV823	0	0	0	0	0	0	0	0	0	0	0	0	0	0	0	0	0	0	0	0	0	0	0	0	0	0	0	14	0	0	0	0	0	0	0	0	0	0	0	0	0	0	0	0	0	0	0	0	0
ASV824	0	0	0	0	0	0	0	0	0	0	0	0	0	0	4	0	0	0	0	0	0	0	0	0	0	0	0	0	0	0	0	0	0	0	0	0	0	0	0	0	0	0	0	0	5	0	0	0	0
ASV825	0	0	0	0	0	0	0	0	0	0	0	0	0	0	0	0	0	0	0	0	0	0	0	0	0	0	0	0	0	0	0	0	0	0	0	57	0	0	0	0	0	0	0	0	0	0	0	0	0
ASV826	0	0	0	0	0	0	0	0	0	0	0	0	0	0	0	0	0	26	0	0	0	0	0	0	0	0	0	0	0	0	0	0	0	0	0	0	0	0	0	0	0	0	0	0	0	0	0	0	0
ASV827	0	0	0	0	0	0	0	0	0	0	0	0	0	0	0	0	0	0	0	5	0	0	0	0	0	0	0	0	0	0	0	0	0	0	0	0	0	0	0	0	0	0	0	0	0	0	0	0	0
ASV828	0	88	0	0	0	0	0	0	0	0	0	0	0	0	0	0	0	0	0	0	0	83	139	269	217	0	0	0	0	0	62	55	0	94	250	0	0	0	0	0	6	40	31	8	90	0	0	0	0
ASV829	0	0	0	0	0	0	0	0	0	0	0	0	0	0	0	0	0	0	0	0	0	0	6	0	0	0	0	0	0	0	0	0	0	0	0	0	0	0	0	0	0	0	0	0	0	0	0	0	0
ASV830	0	0	0	0	0	0	0	0	0	0	0	0	0	0	0	0	0	0	0	0	0	0	0	0	0	0	0	0	0	0	0	0	0	0	0	0	0	0	0	0	0	0	0	0	0	0	0	0	0
ASV831	0	0	0	0	0	0	0	0	0	0	0	83	0	0	0	0	0	0	0	0	0	0	0	0	0	0	0	0	0	0	0	0	0	0	0	0	0	0	0	0	0	0	0	0	0	0	0	0	0
ASV832	0	0	0	0	0	0	0	0	0	0	0	0	0	0	0	0	0	0	0	0	0	0	0	0	0	0	0	0	0	0	0	0	0	0	0	80	0	0	0	0	0	0	0	0	0	0	0	0	0
ASV833	0	0	0	0	0	0	0	0	0	0	0	0	0	0	0	0	0	0	0	0	0	0	0	0	0	21	17	0	0	0	0	0	0	0	0	0	0	0	0	0	0	0	0	0	0	0	0	0	0
[truncated: 23 more columns]

## Sheet: Supplementary Table 3
Permanova on Unifrac (R. chacei and R. exoculata juvenile specimens and R. exoculata adult specimens)
	R2	Pr(>F)	Significance
site	7.68	0.001	***
stage	7.11	0.002	**
species	2.87	0.006	**
Residuals	82.34
Permanova on Weighted Unifrac (R. chacei and R. exoculata juvenile specimens and R. exoculata adult specimens)
	R2	Pr(>F)	Significance
site	7.29	0.001	***
stage	10.1	0.001	***
species	2.27	0.102	ns
Residuals	80.35

## Sheet: Supplementary Table 4
ASV table (R. chacei and R. exoculata adult specimens from BICOSE2014 cruise)
ASV_ID	RimiC01Bc14PL05SP_TD_E1	RimiC01Bc14PL05SP_TD_E2	RimiC01Bc14PL05SP_TD_E3	RimiC04Bc14PL05SP_TD_E1	RimiC04Bc14PL05SP_TD_E2	RimiC04Bc14PL05SP_TD_E3	RimiC05Bc14PL05SP_TD_E1	RimiC05Bc14PL05SP_TD_E3	RimiC09Bc14PL10TAG_TD_E1	RimiC09Bc14PL10TAG_TD_E2	RimiC09Bc14PL10TAG_TD_E3	RimiC11Bc14PL10TAG_TD_E1	RimiC11Bc14PL10TAG_TD_E2	RimiC11Bc14PL10TAG_TD_E3	RimiE212Bc14PL08TAG_TD_E1	RimiE212Bc14PL08TAG_TD_E2	RimiE212Bc14PL08TAG_TD_E3	RimiE293Bc14PL10TAG_TD_E1	RimiE293Bc14PL10TAG_TD_E2	RimiE293Bc14PL10TAG_TD_E3	RimiE298Bc14PL10TAG_TD_E1	RimiE298Bc14PL10TAG_TD_E2	RimiE298Bc14PL10TAG_TD_E3	taxonomy	Kingdom	Phylum	Class	Order
ASV1	131152	134059	127685	276718	261328	292947	608861	383854	297	222	1004	0	0	304	3351	3109	2751	252457	320322	291378	134643	133283	147166	Bacteria	Deferribacterota	Deferribacteres	Deferribacterales	Deferribacteraceae
ASV2	68807	60977	63525	30520	27054	28602	67240	40931	49903	57270	56159	93727	137961	209649	44148	32861	34504	8426	9915	10280	46617	47653	49097	Bacteria	Campylobacterota	Campylobacteria	Campylobacterales	Sulfurovaceae
ASV3	67879	68018	66374	263077	246950	267765	105225	65501	0	0	0	0	0	0	0	146	0	0	0	0	0	0	0	Bacteria	Deferribacterota	Deferribacteres	Deferribacterales	Deferribacteraceae
ASV4	0	0	357	0	0	0	0	0	209430	223893	214936	68280	103935	161298	490	385	0	257	228	335	262	155	300	Bacteria	Deferribacterota	Deferribacteres	Deferribacterales	Deferribacteraceae
ASV5	0	0	0	0	0	0	0	0	0	0	0	0	0	0	1160	882	935	125410	157704	143053	97315	98404	109094	Bacteria	Deferribacterota	Deferribacteres	Deferribacterales	Deferribacteraceae
ASV6	0	0	274	0	0	0	0	0	110634	119251	116827	24858	37187	60003	2448	2010	2092	30495	40139	35478	17067	17189	18342	Bacteria	Deferribacterota	Deferribacteres	Deferribacterales	Deferribacteraceae
ASV7	1245	1174	1000	3550	3346	3500	2267	1119	4386	4897	4853	4168	5200	8187	61592	46854	51138	10668	13603	11490	95049	105335	103856	Bacteria	Campylobacterota	Campylobacteria	Campylobacterales	Sulfurovaceae
ASV8	412	386	488	497	366	440	0	0	6149	6125	7014	46649	43605	59731	79581	58055	65664	1505	2054	1689	14141	15536	14787	Bacteria	Patescibacteria	Parcubacteria	Candidatus Moranbacteria	Incertae Sedis
ASV9	122164	116388	114012	0	0	59	14564	8537	0	0	0	0	0	0	0	0	0	0	0	0	0	0	0	Bacteria	Pseudomonadota	Gammaproteobacteria	Enterobacterales	Vibrionaceae
ASV10	30460	26188	25815	33172	29460	31895	19278	12279	8841	8839	9101	12026	16026	24385	13760	9465	10423	2656	3326	3156	10624	12164	12234	Bacteria	Campylobacterota	Campylobacteria	Campylobacterales	Sulfurovaceae
ASV11	0	0	0	0	0	0	0	0	0	0	0	0	0	0	0	0	0	62970	78459	75150	42066	41654	44418	Bacteria	Deferribacterota	Deferribacteres	Deferribacterales	Deferribacteraceae
ASV12	0	0	0	0	0	0	0	0	47024	50077	50986	6997	8466	13933	651	273	303	5676	7670	7053	0	0	0	Bacteria	Deferribacterota	Deferribacteres	Deferribacterales	Deferribacteraceae
ASV13	210	0	174	900	823	646	117	121	118	0	149	0	40	0	29832	20125	21270	2302	2728	0	21948	23655	23840	Bacteria	Bacillota	Bacilli	Mycoplasmatales	Mycoplasmataceae
ASV14	1897	1600	1600	349	350	304	12156	7451	5003	5768	5916	4185	5750	8742	2180	1791	2072	3419	3809	3639	13118	14630	15151	Bacteria	Campylobacterota	Campylobacteria	Campylobacterales	Sulfurovaceae
ASV15	1227	1321	1394	6249	5091	5761	37738	18499	403	398	472	4074	4414	5808	8335	5974	5679	514	606	375	1970	2308	2050	Bacteria	Bacillota	Bacilli	Mycoplasmatales	Mycoplasmataceae
ASV16	0	0	0	0	0	0	0	0	0	0	0	0	0	0	0	0	0	0	0	0	35534	36226	41150	Bacteria	Deferribacterota	Deferribacteres	Deferribacterales	Deferribacteraceae
ASV17	0	0	11	3833	4044	3687	1243	1105	0	0	0	0	0	0	10776	9294	9421	12127	13399	13154	6108	5616	5492	Bacteria	Bacillota	Clostridia	Lachnospirales	Lachnospiraceae
ASV18	27413	26017	27443	0	0	0	4016	2243	0	0	0	0	0	0	0	0	0	0	0	0	0	0	0	Bacteria	Pseudomonadota	Gammaproteobacteria	Enterobacterales	Vibrionaceae
ASV19	107	0	112	839	771	844	296	0	0	0	55	588	0	639	14950	10994	10917	1701	1872	1628	10920	11487	12651	Bacteria	Pseudomonadota	Gammaproteobacteria	Cardiobacteriales	Cardiobacteriaceae
ASV20	1418	978	856	1054	980	1071	2031	0	1125	980	886	486	642	652	7045	5504	6198	1027	1240	1117	5862	5727	5654	Bacteria	Campylobacterota	Campylobacteria	Campylobacterales	Sulfurovaceae
ASV21	15194	16886	16055	0	0	0	0	0	0	0	0	0	0	0	0	0	0	0	0	0	0	0	0	Bacteria	Pseudomonadota	Gammaproteobacteria	Enterobacterales	Psychromonadaceae
ASV22	9744	8782	8861	3920	3628	3708	377	288	444	451	383	366	335	612	247	214	469	0	0	167	360	211	282	Bacteria	Campylobacterota	Campylobacteria	Campylobacterales	Sulfurovaceae
ASV23	0	0	0	0	0	0	0	0	206	221	184	5737	4899	6629	6352	5291	4130	602	450	661	2628	3001	2805	Bacteria	Bacillota	Bacilli	Mycoplasmatales	Mycoplasmataceae
ASV24	13094	12521	12929	0	0	0	2152	1153	0	0	0	0	0	0	0	0	0	0	0	0	0	0	0	Bacteria	Pseudomonadota	Gammaproteobacteria	Enterobacterales	Vibrionaceae
ASV25	1016	0	98	0	374	469	8384	896	1632	1934	1331	245	809	1120	6966	5283	5368	198	237	146	253	283	218	Bacteria	Campylobacterota	Campylobacteria	Campylobacterales	Sulfurovaceae
ASV26	0	0	0	23187	0	0	0	0	144	0	175	0	0	0	3178	0	2245	0	369	0	1956	0	0	Bacteria	Bacillota	Bacilli	Mycoplasmatales	Mycoplasmataceae
ASV27	0	0	0	0	0	0	17975	11310	0	0	0	0	0	0	0	0	0	0	0	0	0	0	0	Bacteria	Campylobacterota	Campylobacteria	Campylobacterales	Sulfurovaceae
ASV28	260	134	622	0	0	0	2971	1983	740	691	719	0	0	0	7563	5090	6372	0	0	0	1317	437	0	Bacteria	Campylobacterota	Campylobacteria	Campylobacterales	Sulfurovaceae
ASV29	0	0	0	0	0	0	2202	828	206	133	159	249	238	205	3923	2725	3610	2147	3151	3053	772	1028	1021	Bacteria	Campylobacterota	Campylobacteria	Campylobacterales	Sulfurovaceae
ASV30	536	434	441	2522	2232	2220	9643	5287	0	0	0	0	0	0	0	0	0	0	0	0	0	0	0	Bacteria	Bacillota	Bacilli	Mycoplasmatales	Mycoplasmataceae
ASV31	6161	5977	5691	0	0	0	1007	559	0	0	0	0	0	0	0	0	0	0	0	0	0	0	0	Bacteria	Pseudomonadota	Gammaproteobacteria	Enterobacterales	Vibrionaceae
ASV32	5678	5399	5610	0	0	0	518	574	0	0	0	0	0	0	0	0	0	0	0	0	0	0	0	Bacteria	Pseudomonadota	Gammaproteobacteria	Enterobacterales	Vibrionaceae
ASV33	0	0	0	0	0	0	0	0	0	0	0	842	1011	1447	3714	2539	2500	0	0	0	995	987	1168	Bacteria	Bacillota	Bacilli	Mycoplasmatales	Mycoplasmataceae
ASV34	2638	3147	2349	554	610	544	2981	1961	0	0	0	0	0	0	0	0	0	0	0	0	0	0	0	Bacteria	Bacillota	Bacilli	Mycoplasmatales	Mycoplasmataceae
ASV35	3897	4266	3947	416	482	571	0	0	0	0	0	0	0	0	0	0	0	0	0	0	0	107	0	Bacteria	Bacteroidota	Bacteroidia	Flavobacteriales	Flavobacteriaceae
ASV36	0	0	0	0	0	0	0	0	0	0	0	0	0	0	0	0	0	4082	4571	4307	0	0	0	Bacteria	Deferribacterota	Deferribacteres	Deferribacterales	Deferribacteraceae
ASV37	552	736	787	0	0	0	0	0	283	146	279	2414	2755	3770	0	0	0	0	0	0	0	0	0	Bacteria	Pseudomonadota	Gammaproteobacteria	Enterobacterales	Vibrionaceae
ASV38	0	0	0	329	334	327	748	540	0	0	0	0	0	223	1304	933	1089	0	0	0	1752	1885	1701	Bacteria	Campylobacterota	Campylobacteria	Campylobacterales	Sulfurovaceae
ASV39	327	262	243	0	244	231	501	183	0	0	0	212	347	0	1296	725	985	493	0	646	1149	1695	1354	Bacteria	Bacteroidota	Bacteroidia	Flavobacteriales	Flavobacteriaceae
ASV40	425	354	248	151	149	247	578	795	440	406	322	306	568	382	1866	1403	1671	0	310	0	0	0	0	Bacteria	Campylobacterota	Campylobacteria	Campylobacterales	Sulfurovaceae
ASV41	0	0	0	0	0	0	417	432	246	326	403	0	0	0	2708	2379	3034	0	0	0	308	0	317	Bacteria	Campylobacterota	Campylobacteria	Campylobacterales	Sulfurovaceae
ASV42	3200	3648	3501	0	0	0	0	0	0	0	0	0	0	22	0	0	0	0	0	0	0	0	0	Bacteria	Pseudomonadota	Gammaproteobacteria	Enterobacterales	Psychromonadaceae
ASV43	575	530	465	1569	1300	1556	2593	1049	0	53	0	0	0	39	71	62	0	0	0	0	0	0	0	Bacteria	Campylobacterota	Campylobacteria	Campylobacterales	Sulfurovaceae
ASV44	0	0	0	0	0	0	551	159	226	209	194	0	0	288	1148	826	817	578	796	625	905	923	812	Bacteria	Campylobacterota	Campylobacteria	Campylobacterales	Sulfurovaceae
ASV45	0	0	0	922	750	886	1412	775	223	0	0	295	300	428	1005	497	500	0	93	0	0	447	318	Bacteria	Thermodesulfobacteriota	Desulfobulbia	Desulfobulbales	Desulfocapsaceae
ASV46	107	84	103	149	129	157	5269	2779	0	0	0	0	0	0	0	0	0	0	0	0	0	0	0	Bacteria	Campylobacterota	Campylobacteria	Campylobacterales	Sulfurovaceae
ASV47	74	50	48	100	96	124	691	293	427	327	445	269	470	519	1433	853	1104	122	164	144	313	201	457	Bacteria	Campylobacterota	Campylobacteria	Campylobacterales	Sulfurovaceae
ASV48	1087	1104	1126	1799	1695	1730	82	0	0	0	0	0	0	0	0	0	0	0	0	0	0	0	0	Bacteria
ASV49	0	0	0	1116	940	890	0	33	0	0	0	245	270	549	1332	996	962	0	0	96	357	377	299	Bacteria	Thermodesulfobacteriota	Desulfobulbia	Desulfobulbales	Desulfobulbaceae
ASV50	157	0	172	57	0	0	59	0	0	0	0	0	0	0	3144	2154	1949	0	0	0	62	54	0	Bacteria	Bacteroidota	Bacteroidia	Sphingobacteriales	Lentimicrobiaceae
ASV51	0	0	0	264	0	0	0	0	0	193	0	0	0	358	1042	1336	810	0	659	0	680	521	1008	Bacteria	Bacteroidota	Bacteroidia	Flavobacteriales	Flavobacteriaceae
ASV52	0	0	0	0	0	0	0	0	0	0	0	0	0	0	604	434	354	600	773	0	1334	1342	1151	Bacteria	Pseudomonadota	Gammaproteobacteria	Beggiatoales	Leucotrichaceae
ASV53	0	0	0	0	0	0	0	0	0	0	0	0	0	0	2524	1779	1750	0	0	0	0	0	0	Bacteria	Bacillota	Bacilli	Mycoplasmatales	Mycoplasmataceae
ASV54	0	95	89	0	0	0	205	0	0	0	128	0	0	0	1344	1254	844	155	0	0	688	581	458	Bacteria	Campylobacterota	Campylobacteria	Campylobacterales	Sulfurovaceae
ASV55	0	0	35	0	0	0	110	98	190	291	204	0	0	44	1220	1022	1086	177	175	160	351	184	296	Bacteria	Campylobacterota	Campylobacteria	Campylobacterales	Sulfurovaceae
ASV56	0	0	0	58	75	0	2900	1904	0	0	0	0	0	0	0	0	0	0	0	0	0	0	0	Bacteria	Pseudomonadota	Gammaproteobacteria	Arenicellales	Arenicellaceae
ASV57	0	0	0	0	0	0	112	0	250	0	227	100	0	139	969	836	551	0	139	0	403	618	558	Bacteria	Pseudomonadota	Alphaproteobacteria	Rhodobacterales	Paracoccaceae
ASV58	249	255	325	0	52	0	0	0	643	791	667	0	152	216	537	165	457	0	0	0	0	175	168	Bacteria	Pseudomonadota	Alphaproteobacteria	Rhodobacterales	Paracoccaceae
ASV59	1636	1194	1383	174	163	170	0	0	0	0	0	0	0	0	0	0	0	0	0	0	0	0	0	Bacteria	Campylobacterota	Campylobacteria	Campylobacterales	Sulfurovaceae
ASV60	0	0	0	80	0	0	82	0	183	151	106	164	178	393	355	466	368	80	79	115	525	627	703	Bacteria	Campylobacterota	Campylobacteria	Campylobacterales	Sulfurovaceae
ASV61	0	268	0	483	389	405	1946	1155	0	0	0	0	0	0	0	0	0	0	0	0	0	0	0	Bacteria	Campylobacterota	Campylobacteria	Campylobacterales	Sulfurovaceae
ASV62	0	0	0	0	0	0	0	0	0	0	0	1428	1514	1582	0	0	0	0	0	0	0	0	0	Bacteria	Bacillota	Bacilli	Mycoplasmatales	Mycoplasmataceae
ASV63	794	680	617	348	317	359	84	109	0	0	0	221	217	204	0	0	171	0	0	0	142	55	166	Bacteria	Bacteroidota	Bacteroidia	Flavobacteriales	Flavobacteriaceae
ASV64	0	0	0	0	0	0	0	0	0	0	0	0	0	0	1675	0	830	0	0	0	0	898	1056	Bacteria	Campylobacterota	Campylobacteria	Campylobacterales	Sulfurovaceae
ASV65	0	0	0	0	0	0	0	0	0	0	0	0	58	0	0	0	0	97	208	131	1250	1347	1160	Bacteria	Pseudomonadota	Alphaproteobacteria	Rhodobacterales	Paracoccaceae
ASV66	0	0	0	0	0	0	0	71	95	0	0	33	0	0	839	420	395	172	284	204	419	651	637	Bacteria	Bacteroidota	Bacteroidia	Flavobacteriales	Flavobacteriaceae
ASV67	24	32	23	577	500	519	324	0	43	191	121	0	0	31	160	244	174	0	97	41	233	304	572	Bacteria	Campylobacterota	Campylobacteria	Campylobacterales	Sulfurovaceae
ASV68	1328	1405	1134	271	0	0	0	0	0	0	0	0	0	66	0	0	0	0	0	0	0	0	0	Bacteria	Bacteroidota	Bacteroidia	Flavobacteriales	Flavobacteriaceae
ASV69	0	0	0	0	0	0	2387	1650	0	0	0	0	0	0	0	0	0	0	0	0	0	0	0	Bacteria	Campylobacterota	Campylobacteria	Campylobacterales	Sulfurovaceae
ASV70	535	198	0	536	342	248	268	177	0	0	0	0	0	0	558	583	588	0	0	0	0	0	0	Bacteria	Deferribacterota	Deferribacteres	Deferribacterales	Deferribacteraceae
ASV71	0	0	0	0	0	0	806	82	195	265	252	73	160	117	883	501	528	0	0	0	0	0	0	Bacteria	Campylobacterota	Campylobacteria	Campylobacterales	Sulfurovaceae
ASV72	105	0	0	269	236	244	74	0	0	0	0	13	0	47	223	229	333	280	151	183	384	463	266	Bacteria	Campylobacterota	Campylobacteria	Campylobacterales	Campylobacteraceae
ASV73	0	0	0	0	0	0	2470	922	0	0	0	0	0	0	0	0	0	0	0	0	0	0	0	Bacteria	Campylobacterota	Campylobacteria	Campylobacterales	Sulfurovaceae
ASV74	0	0	0	0	0	0	107	0	0	0	372	0	231	0	649	455	612	0	0	0	268	261	323	Bacteria	Pseudomonadota	Gammaproteobacteria	Beggiatoales	Leucotrichaceae
ASV75	0	0	0	0	0	0	182	254	0	259	0	0	183	0	341	341	341	0	0	0	442	403	466	Bacteria	Pseudomonadota	Gammaproteobacteria	Beggiatoales	Leucotrichaceae
ASV76	0	0	0	0	0	0	235	0	591	729	436	0	0	0	403	222	247	0	0	0	0	0	0	Bacteria	Campylobacterota	Campylobacteria	Campylobacterales	Sulfurovaceae
ASV77	245	190	178	308	264	328	544	403	0	0	0	0	0	49	39	0	59	0	0	0	29	35	33	Bacteria	Campylobacterota	Campylobacteria	Campylobacterales	Sulfurovaceae
ASV78	0	0	0	0	0	0	0	0	0	0	21	0	0	0	789	587	397	63	100	0	0	401	336	Bacteria	Campylobacterota	Campylobacteria	Campylobacterales	Sulfurovaceae
ASV79	0	0	0	0	0	0	212	0	0	206	276	0	0	0	0	832	881	0	130	123	0	0	0	Bacteria	Bacteroidota	Bacteroidia	Flavobacteriales	Flavobacteriaceae
ASV80	386	351	280	474	480	505	0	0	0	0	0	0	0	0	52	0	0	0	0	0	0	97	0	Bacteria	Campylobacterota	Campylobacteria	Campylobacterales	Sulfurovaceae
ASV81	760	876	793	0	0	0	0	0	0	0	0	0	0	0	0	0	0	0	0	0	0	0	0	Bacteria
ASV82	0	0	0	0	0	0	0	0	0	0	0	0	0	0	1130	557	702	0	0	0	0	0	0	Bacteria	Bacteroidota	Bacteroidia	Bacteroidales	Marinifilaceae
ASV83	0	0	0	0	0	0	0	0	51	0	81	96	0	158	301	273	183	127	186	146	193	335	255	Bacteria	Pseudomonadota	Zetaproteobacteria	Mariprofundales	Mariprofundaceae
ASV84	0	0	0	0	0	0	0	0	472	0	0	0	0	0	154	172	231	0	0	765	165	161	256	Bacteria	Pseudomonadota	Gammaproteobacteria	Beggiatoales	Leucotrichaceae
ASV85	0	0	0	0	0	0	1220	1132	0	0	0	0	0	0	0	0	0	0	0	0	0	0	0	Bacteria	Bacteroidota	Bacteroidia	Cytophagales	Cyclobacteriaceae
ASV86	0	0	0	0	0	0	0	0	0	0	0	0	0	115	266	148	387	0	0	0	549	401	467	Bacteria	Pseudomonadota	Gammaproteobacteria	Beggiatoales	Leucotrichaceae
ASV87	0	0	0	0	0	0	0	0	0	0	0	77	0	121	166	115	178	91	81	213	265	445	572	Bacteria	Campylobacterota	Campylobacteria	Campylobacterales	Sulfurovaceae
ASV88	0	0	0	0	0	0	1522	767	0	0	0	0	0	0	0	0	0	0	0	0	0	0	0	Bacteria	Pseudomonadota	Gammaproteobacteria	Thiomicrospirales	Thiomicrospiraceae
ASV89	0	0	0	0	0	0	1391	798	0	0	0	0	0	9	0	0	26	0	0	0	0	0	0	Bacteria	Campylobacterota	Campylobacteria	Campylobacterales	Sulfurimonadaceae
ASV90	3	0	0	0	2	0	1	0	0	0	86	0	0	0	526	442	675	116	0	80	197	0	0	Bacteria	Bacteroidota	Bacteroidia	Flavobacteriales	Flavobacteriaceae
ASV91	0	0	0	0	0	0	0	0	0	0	0	0	0	0	0	0	0	746	753	566	0	0	0	Bacteria	Campylobacterota	Campylobacteria	Campylobacterales	Sulfurovaceae
ASV92	0	0	0	0	0	0	0	0	0	0	0	0	0	0	843	0	0	0	0	0	385	338	371	Bacteria	Bacteroidota	Bacteroidia	Flavobacteriales	Flavobacteriaceae
ASV93	0	0	0	122	0	136	0	0	68	0	0	0	168	220	276	161	0	77	0	98	167	440	0	Bacteria	Patescibacteria	Gracilibacteria	JGI 0000069-P22	Incertae Sedis
ASV94	412	426	282	309	220	242	0	0	0	0	0	0	0	0	0	0	0	0	0	0	0	0	0	Bacteria	Pseudomonadota	Gammaproteobacteria	Beggiatoales	Leucotrichaceae
ASV95	0	0	0	0	0	0	292	0	0	0	0	230	395	223	177	263	124	55	66	0	0	0	0	Bacteria	Bacillota	Bacilli	Mycoplasmatales	Mycoplasmataceae
ASV96	0	0	0	0	0	0	393	196	41	0	0	0	0	125	197	196	139	21	0	0	275	229	0	Bacteria	Pseudomonadota	Gammaproteobacteria	Pseudomonadales	Moraxellaceae
ASV97	0	0	0	0	0	0	0	0	85	0	0	0	0	0	150	108	185	154	317	83	336	256	138	Bacteria	Pseudomonadota	Gammaproteobacteria	Cardiobacteriales	Cardiobacteriaceae
ASV98	0	158	64	453	476	592	0	0	0	0	0	0	0	0	0	0	0	0	0	0	0	0	0	Bacteria	Pseudomonadota	Gammaproteobacteria	Cardiobacteriales	Cardiobacteriaceae
ASV99	0	0	0	0	0	0	0	115	211	236	256	48	0	0	378	0	354	0	0	0	0	0	0	Bacteria	Pseudomonadota	Alphaproteobacteria	Rhodobacterales	Paracoccaceae
ASV100	0	0	0	0	0	0	0	0	0	0	0	0	0	0	509	499	0	51	94	20	233	169	0	Bacteria	Bacteroidota	Bacteroidia	Bacteroidales	Marinifilaceae
ASV101	0	103	98	66	51	59	0	0	82	0	52	15	0	53	102	0	0	142	56	0	332	182	136	Bacteria	Campylobacterota	Campylobacteria	Campylobacterales	Arcobacteraceae
ASV102	472	548	461	0	0	0	0	0	0	0	0	0	0	0	0	0	0	0	0	0	0	0	0	Bacteria	Bacteroidota	Bacteroidia	Bacteroidales	Marinilabiliaceae
ASV103	0	0	0	0	0	0	979	490	0	0	0	0	0	0	0	0	0	0	0	0	0	0	0	Bacteria	Pseudomonadota	Gammaproteobacteria	Beggiatoales	Leucotrichaceae
ASV104	227	154	183	56	44	72	58	0	41	0	0	0	0	0	144	90	271	0	115	0	0	0	0	Bacteria	Campylobacterota	Campylobacteria	Campylobacterales	Sulfurovaceae
ASV105	0	0	0	0	0	0	292	244	0	0	0	0	0	0	299	341	213	0	0	0	0	0	0	Bacteria	Pseudomonadota	Gammaproteobacteria	Beggiatoales	Leucotrichaceae
ASV106	0	0	0	0	0	0	0	0	0	107	64	99	194	329	163	0	128	0	0	0	134	105	0	Bacteria	Patescibacteria	Gracilibacteria	JGI 0000069-P22	Incertae Sedis
ASV107	0	0	0	0	0	0	171	0	0	113	171	0	0	0	0	250	364	0	0	0	0	0	196	Bacteria	Thermodesulfobacteriota	Desulfobulbia	Desulfobulbales	Desulfocapsaceae
ASV108	0	0	0	0	0	0	0	0	0	0	0	66	76	57	365	237	262	0	0	37	47	0	75	Bacteria	Pseudomonadota	Gammaproteobacteria	Gammaproteobacteria Incertae Sedis	Unknown Family
ASV109	0	0	0	0	0	0	117	0	0	0	0	0	0	0	470	241	355	0	0	0	0	0	0	Bacteria	Thermodesulfobacteriota	Desulfobulbia	Desulfobulbales	Desulfobulbaceae
ASV110	0	0	0	0	0	0	802	372	0	0	0	0	0	0	0	0	0	0	0	0	0	0	0	Bacteria	Pseudomonadota	Gammaproteobacteria	Thiomicrospirales	Thiomicrospiraceae
ASV111	0	0	0	377	436	332	0	0	0	0	0	0	0	0	0	0	0	0	0	0	0	0	0	Bacteria	Campylobacterota	Campylobacteria	Campylobacterales	Campylobacteraceae
ASV112	0	0	0	0	0	0	125	0	36	0	0	0	0	0	69	55	0	0	0	0	238	347	253	Bacteria	Actinomycetota	Actinobacteria	Propionibacteriales	Propionibacteriaceae
ASV113	0	0	0	0	0	0	0	0	0	0	0	0	0	0	485	276	340	0	0	0	0	0	0	Bacteria	Bacteroidota	Bacteroidia	Flavobacteriales	Flavobacteriaceae
ASV114	0	0	56	54	41	53	73	54	0	0	0	0	0	0	212	175	297	0	78	0	0	0	0	Bacteria	Pseudomonadota	Gammaproteobacteria	Beggiatoales	Leucotrichaceae
ASV115	0	0	42	172	126	154	0	0	0	0	0	0	0	0	0	0	0	0	0	0	590	0	0	Bacteria	Campylobacterota	Campylobacteria	Campylobacterales	Sulfurovaceae
ASV116	275	365	276	0	47	0	0	0	0	0	0	0	0	0	0	96	0	0	0	0	0	0	0	Bacteria	Bacteroidota	Bacteroidia	Bacteroidetes VC2.1 Bac22	Incertae Sedis
ASV117	0	0	172	138	155	0	287	282	0	0	0	0	0	0	0	0	0	0	0	0	0	0	0	Bacteria	Patescibacteria	Parcubacteria	Candidatus Moranbacteria	Incertae Sedis
ASV118	0	0	0	0	0	0	0	0	0	0	0	0	0	0	920	0	0	0	0	0	0	0	0	Bacteria	Ignavibacteriota	Ignavibacteria	Ignavibacteriales	Melioribacteraceae
ASV119	118	0	0	0	0	0	95	0	0	0	0	0	45	0	0	24	65	0	205	155	0	0	180	Bacteria	Campylobacterota	Campylobacteria	Campylobacterales	Arcobacteraceae
ASV120	32	11	48	55	29	41	35	35	12	15	60	46	32	28	98	30	126	20	12	24	38	16	23	Bacteria	Campylobacterota	Campylobacteria	Campylobacterales	Sulfurovaceae
ASV121	204	0	347	0	0	0	0	50	0	0	0	0	0	252	0	0	0	0	0	0	0	0	0	Bacteria	Pseudomonadota	Gammaproteobacteria	Enterobacterales	Vibrionaceae
ASV122	0	0	0	0	0	0	0	0	0	0	30	0	0	37	239	207	187	0	0	0	39	0	112	Bacteria	Bacteroidota	Bacteroidia	Flavobacteriales	Flavobacteriaceae
ASV123	64	55	59	0	57	0	327	281	0	0	0	0	0	0	0	0	0	0	0	0	0	0	0	Bacteria	Actinomycetota	Acidimicrobiia	Microtrichales	Microtrichaceae
ASV124	0	0	0	0	0	0	0	0	0	0	0	0	0	0	377	176	131	0	0	0	0	67	76	Bacteria	Bacteroidota	Bacteroidia	Bacteroidales	Bacteroidetes BD2-2
ASV125	0	0	0	262	197	221	94	0	0	0	0	0	0	0	0	0	0	0	0	0	0	1	0	Bacteria	Pseudomonadota	Gammaproteobacteria	Cardiobacteriales	Cardiobacteriaceae
ASV126	17	0	0	0	0	0	0	0	0	0	0	0	0	0	201	247	235	0	0	0	72	0	0	Bacteria	Campylobacterota	Campylobacteria	Campylobacterales	Sulfurimonadaceae
ASV127	0	0	0	0	0	0	0	0	0	4	0	0	225	320	86	0	0	0	0	0	0	117	0	Bacteria	Thermodesulfobacteriota	Desulfobulbia	Desulfobulbales	Desulfobulbaceae
ASV128	0	0	0	0	0	0	496	250	0	0	0	0	0	0	0	0	0	0	0	0	0	0	0	Bacteria	Bacteroidota	Bacteroidia	Flavobacteriales	Flavobacteriaceae
ASV129	75	0	0	0	0	0	89	0	0	0	0	0	0	0	0	0	229	0	0	0	0	0	346	Bacteria	Campylobacterota	Campylobacteria	Campylobacterales	Sulfurovaceae
ASV130	0	0	0	0	0	0	589	0	0	0	0	0	0	0	124	0	0	6	0	0	0	0	0	Bacteria	Campylobacterota	Campylobacteria	Campylobacterales	Sulfurimonadaceae
ASV131	0	0	0	0	0	0	275	0	0	54	0	90	53	0	0	0	0	0	0	0	0	0	227	Bacteria	Pseudomonadota	Gammaproteobacteria	Pseudomonadales	Moraxellaceae
ASV132	0	0	0	0	0	0	438	251	0	0	0	0	0	0	0	0	0	0	0	0	0	0	0	Bacteria	Pseudomonadota	Gammaproteobacteria	Thiomicrospirales	Thiomicrospiraceae
ASV133	0	0	0	0	0	0	188	0	0	0	0	0	36	0	88	0	0	0	0	0	89	154	98	Bacteria	Pseudomonadota	Gammaproteobacteria	Pseudomonadales	Pseudomonadaceae
ASV134	0	0	0	0	0	0	0	0	0	0	0	55	0	106	184	90	0	0	0	0	215	0	0	Bacteria	Patescibacteria	Gracilibacteria	JGI 0000069-P22	Incertae Sedis
ASV135	0	0	0	0	0	0	0	0	0	0	0	0	0	0	300	141	0	0	84	33	47	0	43	Bacteria	Bacteroidota	Bacteroidia	Flavobacteriales	Flavobacteriaceae
ASV136	0	0	0	0	0	0	0	0	0	0	0	0	0	0	178	176	0	0	0	0	0	119	166	Bacteria	Patescibacteria	Gracilibacteria	Incertae Sedis	Incertae Sedis
ASV137	0	0	0	0	0	0	0	0	0	0	0	139	225	256	0	0	0	0	0	0	0	0	0	Bacteria	Pseudomonadota	Gammaproteobacteria	Enterobacterales	Vibrionaceae
ASV138	0	0	0	0	0	0	19	67	199	0	0	0	28	43	0	32	41	0	0	0	144	0	20	Bacteria	Thermodesulfobacteriota	Desulfobulbia	Desulfobulbales	Desulfocapsaceae
ASV139	206	204	164	0	0	0	0	0	0	0	0	0	0	0	0	0	0	0	0	0	0	0	0	Bacteria	Bacteroidota	Bacteroidia	Flavobacteriales	Crocinitomicaceae
ASV140	191	203	165	0	0	0	0	0	0	0	0	0	0	0	0	0	0	0	0	0	0	0	0	Bacteria	Pseudomonadota	Gammaproteobacteria	Enterobacterales	Vibrionaceae
ASV141	0	0	0	0	0	0	0	0	47	88	124	77	38	141	0	0	0	0	0	0	0	0	0	Bacteria	Campylobacterota	Campylobacteria	Campylobacterales	Sulfurovaceae
ASV142	172	206	126	0	0	0	0	0	0	0	0	0	0	0	0	0	0	0	0	0	0	0	0	Bacteria	Thermodesulfobacteriota	Desulfobulbia	Desulfobulbales	Desulfocapsaceae
ASV143	99	106	138	0	0	0	0	0	0	0	0	88	0	73	0	0	0	0	0	0	0	0	0	Bacteria	Bacillota	Bacilli	Mycoplasmatales	Mycoplasmataceae
ASV144	0	34	0	190	131	136	0	0	0	0	0	0	0	0	0	0	0	0	0	0	0	0	0	Bacteria	Campylobacterota	Campylobacteria	Campylobacterales	Sulfurovaceae
ASV145	0	0	0	0	0	0	0	0	0	0	0	35	44	0	0	50	0	40	0	0	60	73	187	Bacteria	Campylobacterota	Campylobacteria	Campylobacterales	Sulfurimonadaceae
ASV146	0	0	0	0	0	0	0	0	0	0	0	0	0	0	169	180	132	0	0	0	0	0	0	Bacteria	Bacteroidota	Bacteroidia	Bacteroidales
ASV147	156	161	141	0	0	0	0	0	0	0	0	0	0	0	0	0	0	0	0	0	0	0	0	Bacteria	Thermodesulfobacteriota	Desulfobulbia	Desulfobulbales	Desulfobulbaceae
ASV148	0	0	0	0	0	0	0	0	0	0	0	0	0	0	0	0	0	38	0	0	187	109	119	Bacteria	Pseudomonadota	Gammaproteobacteria	Pseudomonadales	Spongiibacteraceae
ASV149	0	0	0	0	0	0	0	0	0	0	0	0	0	1	0	0	0	0	172	150	50	0	53	Bacteria	Bacteroidota	Bacteroidia	Flavobacteriales	Flavobacteriaceae
ASV150	0	0	0	0	0	0	0	0	0	0	0	0	0	0	280	0	0	0	0	0	0	138	0	Bacteria	Thermodesulfobacteriota	Desulfobulbia	Desulfobulbales	Desulfocapsaceae
ASV151	0	0	0	0	18	0	0	0	0	0	0	133	22	29	5	48	54	0	0	8	49	9	41	Bacteria	Thermodesulfobacteriota	Desulfobulbia	Desulfobulbales	Desulfobulbaceae
ASV152	0	0	0	162	112	123	0	0	0	0	0	0	0	0	0	0	0	0	0	0	0	0	0	Bacteria	Campylobacterota	Campylobacteria	Campylobacterales	Sulfurovaceae
ASV153	0	0	0	0	0	0	0	54	0	0	0	24	64	84	2	1	2	0	0	34	77	0	55	Bacteria	Thermodesulfobacteriota	Desulfobulbia	Desulfobulbales	Desulfobulbaceae
ASV154	172	117	107	0	0	0	0	0	0	0	0	0	0	0	0	0	0	0	0	0	0	0	0	Bacteria	Pseudomonadota	Gammaproteobacteria	Ectothiorhodospirales	Ectothiorhodospiraceae
ASV155	0	0	0	0	0	0	0	0	0	0	0	0	0	0	0	0	0	0	175	215	0	0	0	Bacteria	Campylobacterota	Campylobacteria	Campylobacterales	Sulfurovaceae
ASV156	0	0	248	0	0	0	0	0	0	0	0	0	0	0	141	0	0	0	0	0	0	0	0	Bacteria	Bacteroidota	Bacteroidia	Sphingobacteriales	Lentimicrobiaceae
ASV157	0	0	0	148	127	113	0	0	0	0	0	0	0	0	0	0	0	0	0	0	0	0	0	Bacteria	Campylobacterota	Campylobacteria	Campylobacterales	Sulfurovaceae
ASV158	0	0	0	0	0	0	26	0	0	151	188	0	0	0	7	9	0	0	0	0	0	2	2	Bacteria	Thermodesulfobacteriota	Desulfobulbia	Desulfobulbales	Desulfocapsaceae
ASV159	0	63	72	0	0	0	163	67	0	0	0	0	0	0	0	0	0	0	0	0	0	0	0	Bacteria	Campylobacterota	Campylobacteria	Campylobacterales	Sulfurimonadaceae
ASV160	0	0	0	0	0	0	0	0	0	0	0	0	0	0	149	116	99	0	0	0	0	0	0	Bacteria	Bacteroidota	Bacteroidia	Flavobacteriales	Crocinitomicaceae
ASV161	0	0	0	0	0	0	0	0	0	0	0	0	0	0	0	0	198	0	0	0	0	0	159	Bacteria	Patescibacteria	Gracilibacteria	JGI 0000069-P22	Incertae Sedis
ASV162	0	0	0	0	0	0	0	0	0	0	0	0	0	0	108	124	121	0	0	0	0	0	0	Bacteria	Campylobacterota	Campylobacteria	Campylobacterales	Sulfurovaceae
ASV163	0	0	0	0	0	0	0	0	54	0	0	0	0	0	148	0	0	30	0	0	0	73	47	Bacteria	Pseudomonadota	Zetaproteobacteria	Mariprofundales	Mariprofundaceae
ASV164	125	103	121	0	0	0	0	0	0	0	0	0	0	0	0	0	0	0	0	0	0	0	0	Bacteria	Thermodesulfobacteriota	Desulfobulbia	Desulfobulbales	Desulfocapsaceae
ASV165	0	0	0	0	0	0	123	222	0	0	0	0	0	0	0	0	0	0	0	0	0	0	0	Bacteria	Bacteroidota	Bacteroidia	Flavobacteriales	Flavobacteriaceae
ASV166	123	73	148	0	0	0	0	0	0	0	0	0	0	0	0	0	0	0	0	0	0	0	0	Bacteria	Thermodesulfobacteriota	Desulfobulbia	Desulfobulbales	Desulfobulbaceae
ASV167	0	0	0	0	0	0	0	0	0	0	0	0	0	0	161	0	123	0	0	0	57	0	0	Bacteria	Pseudomonadota	Gammaproteobacteria	Beggiatoales	Leucotrichaceae
ASV168	0	0	0	0	0	0	0	0	0	104	0	0	154	81	0	0	0	0	0	0	0	0	0	Bacteria	Pseudomonadota	Gammaproteobacteria	Beggiatoales	Leucotrichaceae
ASV169	0	0	39	0	0	0	127	171	0	0	0	0	0	0	0	0	0	0	0	0	0	0	0	Bacteria	Bacteroidota	Bacteroidia	Flavobacteriales	Cryomorphaceae
ASV170	0	0	0	0	0	0	0	0	0	0	0	0	0	51	35	48	128	0	0	0	42	0	24	Bacteria	Patescibacteria	Gracilibacteria	JGI 0000069-P22	Incertae Sedis
ASV171	0	0	0	0	0	0	52	0	37	0	0	0	0	0	76	0	0	102	0	0	0	0	50	Bacteria	Bacteroidota	Bacteroidia	Flavobacteriales	Flavobacteriaceae
ASV172	125	130	59	0	0	0	0	0	0	0	0	0	0	0	0	0	0	0	0	0	0	0	0	Bacteria	Thermodesulfobacteriota	Desulfobulbia	Desulfobulbales	Desulfobulbaceae
ASV173	0	0	0	0	0	0	0	0	0	0	0	0	0	0	0	0	123	0	54	79	56	0	0	Bacteria	Patescibacteria	Gracilibacteria	Incertae Sedis	Incertae Sedis
ASV174	0	0	0	0	0	0	0	0	0	0	0	97	0	206	0	0	0	0	0	0	0	0	0	Bacteria	Bacillota	Bacilli	Mycoplasmatales	Mycoplasmataceae
ASV175	0	0	0	0	0	0	0	0	3	0	0	65	87	147	0	0	0	0	0	0	0	0	0	Bacteria	Pseudomonadota	Gammaproteobacteria	Enterobacterales	Colwelliaceae
ASV176	0	0	0	0	0	0	202	98	0	0	0	0	0	0	0	0	0	0	0	0	0	0	0	Bacteria	Pseudomonadota	Gammaproteobacteria	Thiomicrospirales	Thiomicrospiraceae
ASV177	0	0	0	0	0	0	0	298	0	0	0	0	0	0	0	0	0	0	0	0	0	0	0	Bacteria	Pseudomonadota	Alphaproteobacteria	Rhodobacterales	Paracoccaceae
ASV178	0	0	0	0	0	0	0	0	0	0	0	0	0	0	0	0	0	0	0	0	130	158	0	Bacteria	Campylobacterota	Campylobacteria	Campylobacterales	Sulfurovaceae
ASV179	0	0	0	0	0	0	0	0	0	0	0	0	0	0	0	0	0	0	0	0	284	0	0	Bacteria	Thermodesulfobacteriota	Desulfobulbia	Desulfobulbales	Desulfocapsaceae
ASV180	0	282	0	0	0	0	0	0	0	0	0	0	0	0	0	0	0	0	0	0	0	0	0	Bacteria	Bacteroidota	Bacteroidia	Sphingobacteriales	Lentimicrobiaceae
ASV181	0	0	0	0	0	0	0	0	0	0	0	0	0	0	0	139	142	0	0	0	0	0	0	Bacteria	Pseudomonadota	Gammaproteobacteria	Beggiatoales	Leucotrichaceae
ASV182	0	0	0	0	0	0	172	36	0	0	0	0	0	0	0	0	31	0	0	19	0	0	0	Bacteria	Pseudomonadota	Gammaproteobacteria	Arenicellales	Arenicellaceae
ASV183	0	0	0	0	0	0	172	83	0	0	0	0	0	0	0	0	0	0	0	0	0	0	0	Bacteria	Campylobacterota	Campylobacteria	Campylobacterales	Sulfurimonadaceae
ASV184	0	0	0	0	0	0	0	0	0	0	0	0	0	0	247	0	0	0	0	0	0	0	0	Bacteria	Patescibacteria	Parcubacteria	Candidatus Moranbacteria	Incertae Sedis
ASV185	0	0	0	0	0	0	0	246	0	0	0	0	0	0	0	0	0	0	0	0	0	0	0	Bacteria	Campylobacterota	Campylobacteria	Campylobacterales	Sulfurimonadaceae
ASV186	0	0	0	0	0	0	0	0	0	0	0	0	0	0	0	0	0	0	0	0	54	98	94	Bacteria	Bacteroidota	Bacteroidia	Chitinophagales	Incertae Sedis
ASV187	0	0	0	0	0	0	0	0	0	0	0	0	0	0	0	0	218	0	0	0	27	0	0	Bacteria	Bacillota	Bacilli	Mycoplasmatales	Mycoplasmataceae
ASV188	0	0	0	0	0	0	0	0	0	0	87	0	0	100	0	0	58	0	0	0	0	0	0	Bacteria	Pseudomonadota	Gammaproteobacteria	Beggiatoales	Leucotrichaceae
ASV189	0	0	0	0	0	0	0	0	0	0	0	0	0	0	168	0	0	0	0	0	0	67	0	Bacteria	Pseudomonadota	Gammaproteobacteria	Beggiatoales	Leucotrichaceae
ASV190	0	0	0	0	0	0	0	0	0	0	0	233	0	0	0	0	0	0	0	0	0	0	0	Bacteria	Pseudomonadota	Gammaproteobacteria	Beggiatoales	Leucotrichaceae
ASV191	0	0	0	0	0	23	207	0	0	0	0	0	0	0	0	0	0	0	0	0	0	0	0	Bacteria	Pseudomonadota	Gammaproteobacteria	Thiomicrospirales	Thiomicrospiraceae
ASV192	0	0	0	0	0	0	0	0	0	0	0	0	226	0	0	0	0	0	0	0	0	0	0	Bacteria	Bacillota	Bacilli	Mycoplasmatales	Mycoplasmataceae
ASV193	0	0	0	0	0	0	0	0	0	0	0	0	0	0	0	0	0	0	123	0	100	0	0	Bacteria	Campylobacterota	Campylobacteria	Campylobacterales	Sulfurospirillaceae
ASV194	0	0	0	0	0	0	0	0	114	69	39	0	0	0	0	0	0	0	0	0	0	0	0	Bacteria	Pseudomonadota	Alphaproteobacteria	Rhodobacterales	Paracoccaceae
ASV195	0	0	0	0	0	0	0	0	111	0	97	0	0	0	3	1	6	0	0	0	3	0	0	Bacteria	Pseudomonadota	Gammaproteobacteria	Beggiatoales	Leucotrichaceae
ASV196	0	0	0	74	0	0	141	0	0	0	0	0	0	0	0	0	0	0	0	0	0	0	0	Bacteria	Pseudomonadota	Gammaproteobacteria	Chromatiales	Sedimenticolaceae
ASV197	0	0	0	0	0	0	108	0	0	0	0	0	14	0	0	0	0	0	0	0	32	56	0	Bacteria	Pseudomonadota	Gammaproteobacteria	Pseudomonadales	Pseudomonadaceae
ASV198	0	0	0	0	0	0	0	0	0	0	0	0	0	0	0	102	0	0	10	0	91	0	0	Bacteria	Pseudomonadota	Zetaproteobacteria	Mariprofundales	Mariprofundaceae
ASV199	0	0	0	0	0	0	0	0	0	0	0	0	0	0	0	0	0	0	0	0	0	0	201	Bacteria	Bacillota	Bacilli	Mycoplasmatales	Mycoplasmataceae
ASV200	0	0	0	0	0	0	0	0	0	0	0	0	0	64	0	0	0	0	0	0	133	0	0	Bacteria	Bacteroidota	Bacteroidia	Chitinophagales	Saprospiraceae
ASV201	126	63	0	0	0	0	0	0	0	0	0	0	0	0	0	0	0	0	0	0	0	0	0	Bacteria	Bacteroidota	Bacteroidia	Bacteroidales	Prolixibacteraceae
ASV202	0	0	0	0	0	0	25	0	0	0	0	0	12	0	41	0	0	0	0	0	46	1	58	Bacteria	Pseudomonadota	Gammaproteobacteria	Pseudomonadales	Pseudomonadaceae
ASV203	0	0	0	0	0	0	0	0	0	56	0	0	0	29	0	0	95	0	0	0	0	0	0	Bacteria	Pseudomonadota	Gammaproteobacteria	Beggiatoales	Leucotrichaceae
ASV204	0	104	71	0	0	0	0	0	0	0	0	0	0	0	0	0	0	0	0	0	0	0	0	Bacteria	Campylobacterota	Campylobacteria	Campylobacterales	Campylobacteraceae
ASV205	0	0	0	0	0	0	0	0	0	0	0	0	0	57	0	0	41	0	0	0	48	27	0	Bacteria	Patescibacteria	Parcubacteria	Candidatus Campbellbacteria	Incertae Sedis
ASV206	0	172	0	0	0	0	0	0	0	0	0	0	0	0	0	0	0	0	0	0	0	0	0	Bacteria	Pseudomonadota	Gammaproteobacteria	Enterobacterales	Vibrionaceae
ASV207	0	0	0	0	0	0	0	0	0	0	0	0	0	0	0	68	104	0	0	0	0	0	0	Bacteria	Bdellovibrionota	Bdellovibrionia	Bdellovibrionales	Pseudobdellovibrionaceae
ASV208	0	0	0	0	0	0	169	0	0	0	0	0	0	0	0	0	0	0	0	0	0	0	0	Bacteria	Bacteroidota	Bacteroidia	Flavobacteriales	Flavobacteriaceae
ASV209	0	0	0	0	0	0	169	0	0	0	0	0	0	0	0	0	0	0	0	0	0	0	0	Bacteria	Pseudomonadota	Alphaproteobacteria	Hyphomicrobiales	Rhizobiaceae
ASV210	162	0	0	0	0	0	0	0	0	0	0	0	0	0	0	0	0	0	0	0	0	0	0	Bacteria	Bacteroidota	Bacteroidia	Flavobacteriales	Flavobacteriaceae
ASV211	0	0	0	0	0	0	0	0	0	0	0	0	0	0	99	0	0	0	0	0	62	0	0	Bacteria	Bacillota	Bacilli	Mycoplasmatales	Mycoplasmataceae
ASV212	37	61	62	0	0	0	0	0	0	0	0	0	0	0	0	0	0	0	0	0	0	0	0	Bacteria	Pseudomonadota	Gammaproteobacteria	Thiomicrospirales	Thiomicrospiraceae
ASV213	0	0	0	0	0	0	0	0	0	0	0	0	0	0	0	160	0	0	0	0	0	0	0	Bacteria	Thermodesulfobacteriota	Desulfobulbia	Desulfobulbales	Desulfobulbaceae
ASV214	0	0	0	0	0	0	0	0	159	0	0	0	0	0	0	0	0	0	0	0	0	0	0	Bacteria	Bacteroidota	Bacteroidia	Flavobacteriales	Flavobacteriaceae
ASV215	0	0	0	0	0	0	0	95	0	0	0	0	0	0	0	0	0	0	0	0	0	63	0	Bacteria	Pseudomonadota	Gammaproteobacteria	Pseudomonadales	Pseudomonadaceae
ASV216	0	0	0	0	0	0	0	0	0	0	0	0	0	0	121	0	36	0	0	0	0	0	0	Bacteria	Verrucomicrobiota	Lentisphaeria	Victivallales	BD2-3
ASV217	0	157	0	0	0	0	0	0	0	0	0	0	0	0	0	0	0	0	0	0	0	0	0	Bacteria	Bacteroidota	Bacteroidia	Flavobacteriales	Flavobacteriaceae
ASV218	0	0	0	0	0	0	94	58	0	0	0	0	0	0	0	0	0	0	0	0	0	0	0	Bacteria	Pseudomonadota	Alphaproteobacteria	Parvibaculales	PS1 clade
ASV219	50	93	0	0	0	0	0	0	0	0	0	0	0	0	0	0	0	0	0	0	0	0	0	Bacteria	Thermodesulfobacteriota	Desulfobulbia	Desulfobulbales	Desulfobulbaceae
ASV220	0	0	0	0	0	0	0	0	142	0	0	0	0	0	0	0	0	0	0	0	0	0	0	Bacteria	Bacteroidota	Bacteroidia	Flavobacteriales	Flavobacteriaceae
ASV221	0	0	0	0	0	0	0	0	0	0	0	0	0	141	0	0	0	0	0	0	0	0	0	Bacteria	Pseudomonadota	Gammaproteobacteria	Enterobacterales	Vibrionaceae
ASV222	45	38	57	0	0	0	0	0	0	0	0	0	0	0	0	0	0	0	0	0	0	0	0	Bacteria	Thermodesulfobacteriota	Desulfobulbia	Desulfobulbales	Desulfocapsaceae
ASV223	0	0	0	0	0	0	0	0	0	0	0	0	0	0	0	0	0	0	0	0	0	140	0	Bacteria	Bacteroidota	Bacteroidia	Flavobacteriales	Flavobacteriaceae
ASV224	0	0	0	0	0	0	42	0	0	0	0	0	0	0	98	0	0	0	0	0	0	0	0	Bacteria	Bacteroidota	Bacteroidia	Flavobacteriales	Flavobacteriaceae
ASV225	55	35	49	0	0	0	0	0	0	0	0	0	0	0	0	0	0	0	0	0	0	0	0	Bacteria	Thermodesulfobacteriota	Desulfobacteria	Desulfobacterales	Incertae Sedis
ASV226	0	0	77	0	0	0	0	0	0	0	0	0	0	0	0	61	0	0	0	0	0	0	0	Bacteria	Thermodesulfobacteriota	Desulfobulbia	Desulfobulbales	Desulfobulbaceae
ASV227	0	0	0	37	44	56	0	0	0	0	0	0	0	0	0	0	0	0	0	0	0	0	0	Bacteria	Campylobacterota	Campylobacteria	Campylobacterales	Campylobacteraceae
ASV228	0	0	0	0	0	0	0	0	0	0	0	0	0	0	34	31	0	0	0	0	0	0	69	Bacteria	Verrucomicrobiota	Kiritimatiellia	Kiritimatiellales	Kiritimatiellaceae
ASV229	0	0	0	0	0	0	0	0	0	0	17	0	0	116	0	0	0	0	0	0	0	0	0	Bacteria	Pseudomonadota	Gammaproteobacteria	Beggiatoales	Leucotrichaceae
ASV230	0	0	132	0	0	0	0	0	0	0	0	0	0	0	0	0	0	0	0	0	0	0	0	Bacteria	Bacteroidota	Bacteroidia	Flavobacteriales	Flavobacteriaceae
ASV231	0	0	0	0	0	0	0	0	0	0	0	0	0	0	0	0	0	0	0	0	0	132	0	Bacteria	Bacillota	Clostridia	Peptostreptococcales-Tissierellales	Peptostreptococcaceae
ASV232	0	0	0	46	0	30	0	0	0	0	15	0	0	0	22	0	0	0	0	17	0	0	0	Bacteria	Campylobacterota	Campylobacteria	Campylobacterales	Sulfurovaceae
ASV233	0	0	0	0	0	0	0	129	0	0	0	0	0	0	0	0	0	0	0	0	0	0	0	Bacteria	Bacillota	Bacilli	Mycoplasmatales	Mycoplasmataceae
ASV234	0	0	0	0	0	0	0	0	0	0	0	0	0	0	93	0	0	0	0	0	0	35	0	Bacteria	Pseudomonadota	Gammaproteobacteria	Beggiatoales	Leucotrichaceae
ASV235	0	0	0	0	0	0	0	124	0	0	0	0	0	0	0	0	0	0	0	0	0	0	0	Bacteria	Deferribacterota	Deferribacteres	Deferribacterales	Deferribacteraceae
ASV236	0	12	0	0	0	0	1	0	0	0	0	19	0	0	2	36	53	0	0	0	0	0	0	Bacteria	Bacteroidota	Bacteroidia	Flavobacteriales	Flavobacteriaceae
ASV237	0	0	0	0	0	0	123	0	0	0	0	0	0	0	0	0	0	0	0	0	0	0	0	Bacteria	Patescibacteria	Gracilibacteria	Incertae Sedis	Incertae Sedis
ASV238	0	64	58	0	0	0	0	0	0	0	0	0	0	0	0	0	0	0	0	0	0	0	0	Bacteria	Thermodesulfobacteriota	Desulfobulbia	Desulfobulbales	Desulfocapsaceae
ASV239	49	37	35	0	0	0	0	0	0	0	0	0	0	0	0	0	0	0	0	0	0	0	0	Bacteria	Pseudomonadota	Gammaproteobacteria	UBA10353 marine group	Incertae Sedis
ASV240	0	0	0	0	0	0	0	0	0	0	0	0	0	0	0	120	0	0	0	0	0	0	0	Bacteria	Patescibacteria	Parcubacteria	Candidatus Moranbacteria	Incertae Sedis
ASV241	0	0	0	0	0	0	0	0	0	0	0	0	0	0	0	31	87	0	0	0	0	0	0	Bacteria	Campylobacterota	Campylobacteria	Campylobacterales	Sulfurovaceae
ASV242	0	0	0	0	0	0	0	0	0	0	0	30	0	0	0	87	0	0	0	0	0	0	0	Bacteria	Patescibacteria	Parcubacteria	Candidatus Campbellbacteria	Incertae Sedis
ASV243	0	0	0	0	0	0	0	0	0	0	0	0	0	0	33	0	30	0	0	36	0	17	0	Bacteria	Pseudomonadota	Gammaproteobacteria	Lysobacterales	Lysobacteraceae
ASV244	0	0	0	0	0	6	0	0	0	0	0	0	0	0	0	110	0	0	0	0	0	0	0	Bacteria	Patescibacteria	Gracilibacteria	JGI 0000069-P22	Incertae Sedis
ASV245	0	0	0	0	0	0	115	0	0	0	0	0	0	0	0	0	0	0	0	0	0	0	0	Bacteria	Pseudomonadota	Gammaproteobacteria	Gammaproteobacteria Incertae Sedis	Unknown Family
ASV246	0	0	0	0	0	0	0	114	0	0	0	0	0	0	0	0	0	0	0	0	0	0	0	Bacteria	Pseudomonadota	Alphaproteobacteria	Rhodobacterales	Paracoccaceae
ASV247	0	0	0	0	0	0	0	0	0	0	25	0	29	60	0	0	0	0	0	0	0	0	0	Bacteria	Pseudomonadota	Gammaproteobacteria	Beggiatoales	Leucotrichaceae
ASV248	0	3	109	0	0	0	0	0	0	0	0	0	0	0	0	0	0	0	0	0	0	0	0	Bacteria	Pseudomonadota	Gammaproteobacteria	Beggiatoales	Leucotrichaceae
ASV249	0	0	0	0	0	0	0	0	0	0	0	0	0	0	0	0	109	0	0	0	0	0	0	Bacteria	Pseudomonadota	Gammaproteobacteria	Pseudomonadales	Pseudomonadaceae
ASV250	0	0	0	0	0	0	109	0	0	0	0	0	0	0	0	0	0	0	0	0	0	0	0	Bacteria	Pseudomonadota	Gammaproteobacteria	Gammaproteobacteria Incertae Sedis	Unknown Family
ASV251	0	0	0	0	0	0	0	0	0	0	0	0	0	0	0	0	0	0	0	0	0	0	108	Bacteria	Deinococcota	Deinococci	Deinococcales	Trueperaceae
ASV252	0	0	0	0	0	0	0	0	0	0	0	0	0	0	0	0	0	0	0	28	0	78	0	Bacteria	Patescibacteria	Gracilibacteria	JGI 0000069-P22	Incertae Sedis
ASV253	23	38	44	0	0	0	0	0	0	0	0	0	0	0	0	0	0	0	0	0	0	0	0	Bacteria	Pseudomonadota	Gammaproteobacteria	Ectothiorhodospirales	Ectothiorhodospiraceae
ASV254	0	0	0	0	0	0	0	105	0	0	0	0	0	0	0	0	0	0	0	0	0	0	0	Bacteria	Pseudomonadota	Gammaproteobacteria	Gammaproteobacteria Incertae Sedis	Unknown Family
ASV255	0	0	0	0	0	0	0	105	0	0	0	0	0	0	0	0	0	0	0	0	0	0	0	Bacteria	Deferribacterota	Deferribacteres	Deferribacterales	Deferribacteraceae
ASV256	0	0	0	0	0	0	0	0	0	0	0	0	54	0	0	0	0	0	0	0	51	0	0	Bacteria	Patescibacteria	Parcubacteria	Candidatus Campbellbacteria	Incertae Sedis
ASV257	0	0	0	0	0	0	102	0	0	0	0	0	0	0	0	0	0	0	0	0	0	0	0	Bacteria	Bacteroidota	Bacteroidia	Flavobacteriales	Flavobacteriaceae
ASV258	0	0	0	0	0	0	0	0	102	0	0	0	0	0	0	0	0	0	0	0	0	0	0	Bacteria	Pseudomonadota	Gammaproteobacteria	Beggiatoales	Leucotrichaceae
ASV259	0	0	0	0	0	0	0	6	0	0	0	0	0	0	79	0	0	0	0	0	0	14	0	Bacteria	Bacteroidota	Bacteroidia	Flavobacteriales	Flavobacteriaceae
ASV260	0	0	0	52	0	46	0	0	0	0	0	0	0	0	0	0	0	0	0	0	0	0	0	Bacteria	Campylobacterota	Campylobacteria	Campylobacterales	Sulfurovaceae
ASV261	0	0	0	0	0	0	0	0	0	0	21	0	0	0	76	0	0	0	0	0	0	0	0	Bacteria	Patescibacteria	Gracilibacteria	Incertae Sedis	Incertae Sedis
ASV262	0	61	0	0	0	0	35	0	0	0	0	0	0	0	0	0	0	0	0	0	0	0	0	Bacteria	Thermodesulfobacteriota	Desulfuromonadia	Desulfuromonadales	Geopsychrobacteraceae
ASV263	0	0	0	0	0	0	0	96	0	0	0	0	0	0	0	0	0	0	0	0	0	0	0	Bacteria	Pseudomonadota	Gammaproteobacteria	Pseudomonadales	Pseudomonadaceae
ASV264	0	0	0	0	0	0	0	0	0	0	0	0	0	0	0	0	0	0	0	0	0	95	0	Bacteria	Bacillota	Bacilli	Mycoplasmatales	Mycoplasmataceae
ASV265	0	0	0	0	0	56	0	0	0	0	0	0	0	0	0	0	0	0	0	0	38	0	0	Bacteria	Campylobacterota	Campylobacteria	Campylobacterales	Campylobacteraceae
ASV266	0	0	0	0	0	0	0	0	0	0	0	0	0	94	0	0	0	0	0	0	0	0	0	Bacteria	Pseudomonadota	Gammaproteobacteria	Beggiatoales	Leucotrichaceae
ASV267	0	0	0	0	0	0	0	11	25	0	0	0	0	0	0	0	0	0	0	0	0	0	57	Bacteria	Patescibacteria	Gracilibacteria	JGI 0000069-P22	Incertae Sedis
ASV268	0	0	0	0	0	0	0	0	0	0	0	0	0	0	79	13	0	0	0	0	0	0	0	Bacteria	Patescibacteria	Gracilibacteria	JGI 0000069-P22	Incertae Sedis
ASV269	0	0	0	0	0	0	0	0	0	0	0	0	0	0	0	91	0	0	0	0	0	0	0	Bacteria	Pseudomonadota	Gammaproteobacteria	Beggiatoales	Leucotrichaceae
ASV270	90	0	0	0	0	0	0	0	0	0	0	0	0	0	0	0	0	0	0	0	0	0	0	Bacteria	Thermodesulfobacteriota	Desulfuromonadia	Desulfuromonadales	Geopsychrobacteraceae
ASV271	43	0	46	0	0	0	0	0	0	0	0	0	0	0	0	0	0	0	0	0	0	0	0	Bacteria	Thermodesulfobacteriota	Desulfobulbia	Desulfobulbales	Desulfobulbaceae
ASV272	0	0	0	0	0	0	0	0	0	0	0	0	0	0	0	89	0	0	0	0	0	0	0	Bacteria	Bacteroidota	Bacteroidia	Flavobacteriales	Flavobacteriaceae
ASV273	0	0	0	0	0	0	88	0	0	0	0	0	0	0	0	0	0	0	0	0	0	0	0	Bacteria	Pseudomonadota	Alphaproteobacteria
ASV274	24	33	29	0	0	0	0	0	0	0	0	0	0	0	0	0	0	0	0	0	0	0	0	Bacteria	Thermodesulfobacteriota	Desulfobulbia	Desulfobulbales	Desulfobulbaceae
ASV275	0	54	0	0	28	3	0	0	0	0	0	0	0	0	0	0	0	0	0	0	0	0	0	Bacteria	Pseudomonadota	Gammaproteobacteria	Beggiatoales	Leucotrichaceae
ASV276	0	0	0	0	0	0	0	0	0	0	0	0	0	0	45	0	39	0	0	0	0	0	0	Bacteria	Patescibacteria	Gracilibacteria	JGI 0000069-P22	Incertae Sedis
ASV277	0	0	0	0	0	0	84	0	0	0	0	0	0	0	0	0	0	0	0	0	0	0	0	Bacteria	Pseudomonadota	Gammaproteobacteria	Beggiatoales	Leucotrichaceae
ASV278	0	0	0	0	0	0	0	83	0	0	0	0	0	0	0	0	0	0	0	0	0	0	0	Eukaryota
ASV279	0	0	0	0	0	0	0	0	0	0	0	0	0	0	0	43	0	0	0	0	0	0	40	Bacteria	Bacteroidota	Bacteroidia	Chitinophagales	Saprospiraceae
ASV280	0	0	0	0	0	0	0	0	0	0	0	0	0	0	0	0	0	0	0	0	83	0	0	Bacteria	Bacteroidota	Bacteroidia	Bacteroidales	Bacteroidaceae
ASV281	0	0	0	0	0	0	0	0	0	0	43	0	0	0	0	1	0	37	0	2	0	0	0	Bacteria	Bacteroidota	Bacteroidia	Flavobacteriales	Flavobacteriaceae
ASV282	0	0	0	0	0	0	0	0	0	0	19	0	0	0	0	13	45	0	0	0	6	0	0	Bacteria	Bacteroidota	Bacteroidia	Flavobacteriales	Flavobacteriaceae
ASV283	0	0	0	0	0	0	29	53	0	0	0	0	0	0	0	0	0	0	0	0	0	0	0	Bacteria	Bacteroidota	Bacteroidia	Sphingobacteriales	Lentimicrobiaceae
ASV284	0	0	0	0	0	0	0	0	0	0	0	0	0	0	55	0	27	0	0	0	0	0	0	Bacteria	Deferribacterota	Deferribacteres	Deferribacterales	Deferribacteraceae
ASV285	0	0	0	0	0	0	81	0	0	0	0	0	0	0	0	0	0	0	0	0	0	0	0	Bacteria	Bacillota	Bacilli	Staphylococcales	Staphylococcaceae
ASV286	0	0	0	0	0	0	0	0	0	80	0	0	0	0	0	0	0	0	0	0	0	0	0	Bacteria	Bacteroidota	Bacteroidia	Flavobacteriales	Flavobacteriaceae
ASV287	0	0	80	0	0	0	0	0	0	0	0	0	0	0	0	0	0	0	0	0	0	0	0	Bacteria	Bacteroidota	Bacteroidia	Flavobacteriales	Flavobacteriaceae
ASV288	0	0	0	0	0	0	0	0	0	0	0	0	79	0	0	0	0	0	0	0	0	0	0	Bacteria	Pseudomonadota	Gammaproteobacteria	Beggiatoales	Leucotrichaceae
ASV289	0	0	0	0	0	0	0	0	0	0	0	0	0	0	0	0	0	79	0	0	0	0	0	Bacteria	Campylobacterota	Campylobacteria	Campylobacterales	Sulfurospirillaceae
ASV290	0	0	0	0	0	0	79	0	0	0	0	0	0	0	0	0	0	0	0	0	0	0	0	Bacteria	Pseudomonadota	Zetaproteobacteria	Mariprofundales	Mariprofundaceae
ASV291	0	0	0	0	0	0	33	0	0	0	0	0	0	0	46	0	0	0	0	0	0	0	0	Bacteria	Bacteroidota	Bacteroidia	Chitinophagales	Saprospiraceae
ASV292	0	0	0	0	0	0	0	0	0	0	0	0	0	0	0	78	0	0	0	0	0	0	0	Bacteria	Patescibacteria	Gracilibacteria	JGI 0000069-P22	Incertae Sedis
ASV293	0	0	0	0	0	0	0	0	0	0	0	0	0	0	0	0	0	0	78	0	0	0	0	Bacteria	Patescibacteria	Gracilibacteria	Incertae Sedis	Incertae Sedis
ASV294	7	18	17	8	0	0	0	0	0	0	0	0	0	27	0	0	0	0	0	0	0	0	0	Bacteria	Bacteroidota	Bacteroidia	Flavobacteriales	Flavobacteriaceae
ASV295	0	0	0	0	0	0	0	0	0	0	0	77	0	0	0	0	0	0	0	0	0	0	0	Bacteria	Pseudomonadota	Gammaproteobacteria	Beggiatoales	Leucotrichaceae
ASV296	0	0	0	0	0	0	0	0	0	0	0	0	0	77	0	0	0	0	0	0	0	0	0	Bacteria	Bacillota	Bacilli	Mycoplasmatales	Mycoplasmataceae
ASV297	0	0	0	0	0	0	76	0	0	0	0	0	0	0	0	0	0	0	0	0	0	0	0	Bacteria	Pseudomonadota	Alphaproteobacteria	Rhodobacterales	Paracoccaceae
ASV298	0	0	0	0	0	74	0	0	0	0	0	0	0	0	0	0	0	0	0	0	0	0	0	Bacteria	Campylobacterota	Campylobacteria	Campylobacterales	Sulfurovaceae
ASV299	0	0	0	0	0	0	0	0	0	0	0	0	0	0	0	74	0	0	0	0	0	0	0	Bacteria	Ignavibacteriota	Ignavibacteria	Ignavibacteriales	Melioribacteraceae
ASV300	0	0	0	0	0	0	0	0	0	0	0	0	0	0	0	0	74	0	0	0	0	0	0	Bacteria	Patescibacteria	Gracilibacteria	JGI 0000069-P22	Incertae Sedis
ASV301	0	0	0	0	0	0	0	0	0	0	0	0	0	0	0	0	73	0	0	0	0	0	0	Bacteria	Patescibacteria	Parcubacteria	Candidatus Moranbacteria	Incertae Sedis
ASV302	0	0	0	0	0	0	0	0	0	0	0	0	0	0	64	4	5	0	0	0	0	0	0	Bacteria	Bacteroidota	Bacteroidia	Flavobacteriales	Flavobacteriaceae
ASV303	0	0	0	0	0	0	0	0	0	0	0	0	0	0	72	0	0	0	0	0	0	0	0	Bacteria	Thermodesulfobacteriota	Desulfobulbia	Desulfobulbales	Desulfobulbaceae
ASV304	0	0	0	72	0	0	0	0	0	0	0	0	0	0	0	0	0	0	0	0	0	0	0	Bacteria	Campylobacterota	Campylobacteria	Campylobacterales	Sulfurovaceae
ASV305	0	0	0	0	0	0	71	0	0	0	0	0	0	0	0	0	0	0	0	0	0	0	0	Bacteria	Pseudomonadota	Gammaproteobacteria	Gammaproteobacteria Incertae Sedis	Unknown Family
ASV306	0	0	71	0	0	0	0	0	0	0	0	0	0	0	0	0	0	0	0	0	0	0	0	Bacteria	Campylobacterota	Campylobacteria	Campylobacterales	Sulfurovaceae
ASV307	0	0	0	0	0	0	0	0	0	0	0	0	0	0	0	0	71	0	0	0	0	0	0	Bacteria	Pseudomonadota	Gammaproteobacteria	Burkholderiales	Comamonadaceae
ASV308	0	0	0	46	0	23	0	0	0	0	0	0	0	0	0	0	0	0	0	0	0	0	0	Bacteria	Patescibacteria	Gracilibacteria	JGI 0000069-P22	Incertae Sedis
ASV309	0	0	0	0	0	0	0	0	0	0	0	0	0	0	0	68	0	0	0	0	0	0	0	Bacteria	Pseudomonadota	Gammaproteobacteria	Beggiatoales	Leucotrichaceae
ASV310	0	0	0	0	0	0	0	0	0	0	0	0	0	0	0	0	0	0	0	0	0	67	0	Bacteria	Campylobacterota	Campylobacteria	Nautiliales	Nautiliaceae
ASV311	0	0	0	0	0	0	0	0	0	66	0	0	0	0	0	0	0	0	0	0	0	0	0	Bacteria	Campylobacterota	Campylobacteria	Campylobacterales	Sulfurovaceae
ASV312	0	0	0	0	0	0	0	0	0	0	0	0	0	0	0	4	2	0	26	0	30	4	0	Bacteria	Pseudomonadota	Gammaproteobacteria	Beggiatoales	Leucotrichaceae
ASV313	0	0	0	0	0	0	0	0	0	0	0	65	0	0	0	0	0	0	0	0	0	0	0	Bacteria	Pseudomonadota	Gammaproteobacteria	Beggiatoales	Leucotrichaceae
ASV314	0	0	0	0	0	0	0	0	0	0	0	0	0	0	0	0	0	0	0	0	0	63	0	Bacteria	Patescibacteria	Gracilibacteria	JGI 0000069-P22	Incertae Sedis
ASV315	0	0	0	0	0	0	0	62	0	0	0	0	0	0	0	0	0	0	0	0	0	0	0	Bacteria	Pseudomonadota	Gammaproteobacteria	Thiomicrospirales	Thiomicrospiraceae
ASV316	0	0	0	0	0	0	0	62	0	0	0	0	0	0	0	0	0	0	0	0	0	0	0	Bacteria	Deferribacterota	Deferribacteres	Deferribacterales	Deferribacteraceae
ASV317	0	0	0	0	0	0	0	62	0	0	0	0	0	0	0	0	0	0	0	0	0	0	0	Bacteria	Bacillota	Bacilli	Mycoplasmatales	Mycoplasmataceae
ASV318	61	0	0	0	0	0	0	0	0	0	0	0	0	0	0	0	0	0	0	0	0	0	0	Bacteria	Thermodesulfobacteriota	Desulfobulbia	Desulfobulbales	Desulfobulbaceae
ASV319	0	0	0	0	0	0	0	0	0	0	0	0	0	0	0	0	61	0	0	0	0	0	0	Bacteria	Pseudomonadota	Gammaproteobacteria	Beggiatoales	Leucotrichaceae
ASV320	0	0	0	0	0	0	0	0	0	0	0	0	0	0	60	0	0	0	0	0	0	0	0	Bacteria	Campylobacterota	Campylobacteria	Campylobacterales	Sulfurovaceae
ASV321	0	0	0	0	0	0	0	0	0	0	0	0	0	0	0	0	0	0	0	0	0	43	17	Bacteria	Bacteroidota	Bacteroidia	Chitinophagales	Incertae Sedis
ASV322	60	0	0	0	0	0	0	0	0	0	0	0	0	0	0	0	0	0	0	0	0	0	0	Bacteria	Pseudomonadota	Gammaproteobacteria	Beggiatoales	Leucotrichaceae
ASV323	0	0	0	0	0	0	0	0	0	0	0	0	0	0	59	0	0	0	0	0	0	0	0	Bacteria	Pseudomonadota	Gammaproteobacteria	Beggiatoales	Leucotrichaceae
ASV324	0	0	0	0	0	0	0	0	0	0	0	0	0	0	0	0	59	0	0	0	0	0	0	Bacteria	Bacteroidota	Bacteroidia	Flavobacteriales	Flavobacteriaceae
ASV325	0	0	0	0	0	0	0	0	0	0	0	0	0	0	0	0	0	0	59	0	0	0	0	Bacteria	Patescibacteria	Gracilibacteria	JGI 0000069-P22	Incertae Sedis
ASV326	0	0	0	0	0	0	0	0	0	0	0	0	0	0	0	0	0	0	0	0	59	0	0	Bacteria	Bacteroidota	Bacteroidia	Bacteroidales	Bacteroidaceae
ASV327	0	0	59	0	0	0	0	0	0	0	0	0	0	0	0	0	0	0	0	0	0	0	0	Bacteria	Bacteroidota	Bacteroidia	Bacteroidetes VC2.1 Bac22	Incertae Sedis
ASV328	0	0	0	0	30	28	0	0	0	0	0	0	0	0	0	0	0	0	0	0	0	0	0	Bacteria	Thermodesulfobacteriota	Desulfobulbia	Desulfobulbales	Desulfocapsaceae
ASV329	0	0	0	0	0	0	0	0	0	0	0	0	0	0	0	58	0	0	0	0	0	0	0	Bacteria	Pseudomonadota	Gammaproteobacteria	Pseudomonadales	Pseudomonadaceae
ASV330	0	0	0	0	0	0	0	0	0	0	0	0	0	0	34	0	0	0	0	0	23	0	0	Bacteria
ASV331	0	0	0	0	0	0	0	0	0	0	0	0	0	0	0	0	0	0	0	12	45	0	0	Bacteria	Campylobacterota	Campylobacteria	Campylobacterales	Sulfurovaceae
ASV332	0	0	0	0	0	0	0	57	0	0	0	0	0	0	0	0	0	0	0	0	0	0	0	Bacteria	Pseudomonadota	Gammaproteobacteria	Chromatiales	Sedimenticolaceae
ASV333	0	57	0	0	0	0	0	0	0	0	0	0	0	0	0	0	0	0	0	0	0	0	0	Bacteria	Bacteroidota	Bacteroidia	Bacteroidetes VC2.1 Bac22	Incertae Sedis
ASV334	0	0	0	0	0	0	56	0	0	0	0	0	0	0	0	0	0	0	0	0	0	0	0	Bacteria	Bacteroidota	Bacteroidia	Flavobacteriales	Flavobacteriaceae
ASV335	0	0	0	0	0	0	0	0	0	0	0	0	0	0	0	0	0	0	0	0	37	19	0	Bacteria	Bacillota	Bacilli	Staphylococcales	Staphylococcaceae
ASV336	22	33	0	0	0	0	0	0	0	0	0	0	0	0	0	0	0	0	0	0	0	0	0	Bacteria	Thermodesulfobacteriota	Desulfobulbia	Desulfobulbales	Desulfobulbaceae
ASV337	0	0	0	0	0	0	0	0	54	0	0	0	0	0	0	0	0	0	0	0	0	0	0	Bacteria	Pseudomonadota	Gammaproteobacteria	Beggiatoales	Leucotrichaceae
ASV338	0	0	0	0	0	0	0	0	0	0	54	0	0	0	0	0	0	0	0	0	0	0	0	Bacteria	Bacteroidota	Bacteroidia	Flavobacteriales	Flavobacteriaceae
ASV339	0	0	0	0	0	0	0	0	0	0	0	0	0	0	0	0	0	0	0	0	53	0	0	Bacteria	Bacillota	Clostridia	Lachnospirales	Lachnospiraceae
ASV340	0	0	0	0	0	0	0	0	0	0	0	0	0	0	0	0	0	0	0	0	53	0	0	Bacteria	Pseudomonadota	Gammaproteobacteria	Enterobacterales	Enterobacteriaceae
ASV341	0	0	0	0	34	0	0	0	18	0	0	0	0	0	0	0	0	0	0	0	0	0	0	Bacteria	Campylobacterota	Campylobacteria	Campylobacterales	Sulfurovaceae
ASV342	0	0	0	0	0	0	0	0	0	0	0	0	0	0	0	0	0	0	0	0	0	0	52	Bacteria	Campylobacterota	Campylobacteria	Campylobacterales	Sulfurovaceae
ASV343	0	0	0	0	0	0	0	0	0	0	51	0	0	0	0	0	0	0	0	0	0	0	0	Bacteria	Pseudomonadota	Alphaproteobacteria	Rhodobacterales	Paracoccaceae
ASV344	0	0	0	0	0	0	0	0	0	0	0	0	0	0	0	51	0	0	0	0	0	0	0	Bacteria	Pseudomonadota	Gammaproteobacteria	Beggiatoales	Leucotrichaceae
ASV345	0	0	0	0	0	0	0	50	0	0	0	0	0	0	0	0	0	0	0	0	0	0	0	Bacteria	Campylobacterota	Campylobacteria	Campylobacterales	Sulfurospirillaceae
ASV346	0	0	0	0	0	0	0	0	0	0	0	0	0	0	0	0	50	0	0	0	0	0	0	Bacteria	Pseudomonadota	Zetaproteobacteria	Mariprofundales	Mariprofundaceae
ASV347	0	0	0	0	0	0	0	0	0	0	0	0	0	0	0	0	0	0	0	50	0	0	0	Bacteria	Campylobacterota	Campylobacteria	Campylobacterales	Hydrogenimonadaceae
ASV348	0	0	0	22	0	27	0	0	0	0	0	0	0	0	0	0	0	0	0	0	0	0	0	Bacteria	Campylobacterota	Campylobacteria	Campylobacterales	Sulfurovaceae
ASV349	0	0	0	0	0	49	0	0	0	0	0	0	0	0	0	0	0	0	0	0	0	0	0	Bacteria	Pseudomonadota	Gammaproteobacteria	Beggiatoales	Leucotrichaceae
ASV350	0	0	0	0	0	0	0	0	0	0	0	0	0	0	0	0	0	0	0	49	0	0	0	Bacteria	Deferribacterota	Deferribacteres	Deferribacterales	Deferribacteraceae
ASV351	0	48	0	0	0	0	0	0	0	0	0	0	0	0	0	0	0	0	0	0	0	0	0	Bacteria	Thermodesulfobacteriota	Desulfobulbia	Desulfobulbales	Desulfobulbaceae
ASV352	0	0	0	0	0	0	0	0	0	0	0	0	48	0	0	0	0	0	0	0	0	0	0	Bacteria	Bacillota	Clostridia	Peptostreptococcales-Tissierellales	Peptostreptococcaceae
ASV353	0	0	0	0	0	0	0	0	0	0	0	0	0	0	0	0	48	0	0	0	0	0	0	Bacteria	Thermodesulfobacteriota	Desulfobulbia	Desulfobulbales	Desulfobulbaceae
ASV354	0	0	0	0	0	0	0	0	0	0	0	0	0	0	0	0	0	0	0	0	0	0	48	Bacteria	Bacillota	Clostridia	Oscillospirales	Ruminococcaceae
ASV355	0	0	0	0	0	0	0	0	0	0	0	0	0	0	0	0	0	0	0	45	0	0	0	Bacteria	Pseudomonadota	Gammaproteobacteria	Cardiobacteriales	Cardiobacteriaceae
ASV356	0	0	0	0	0	0	0	0	0	0	0	0	0	0	0	0	0	0	0	0	0	0	45	Bacteria	Bacteroidota	Bacteroidia	Bacteroidales	Tannerellaceae
ASV357	0	0	0	0	0	0	0	0	0	0	0	0	0	0	0	0	0	0	45	0	0	0	0	Bacteria	Bacteroidota	Bacteroidia	Bacteroidetes VC2.1 Bac22	Incertae Sedis
ASV358	13	0	0	0	0	0	32	0	0	0	0	0	0	0	0	0	0	0	0	0	0	0	0	Bacteria	Campylobacterota	Campylobacteria	Campylobacterales	Sulfurimonadaceae
ASV359	0	0	45	0	0	0	0	0	0	0	0	0	0	0	0	0	0	0	0	0	0	0	0	Bacteria	Bacteroidota	Bacteroidia	Bacteroidetes VC2.1 Bac22	Incertae Sedis
ASV360	0	0	0	0	0	0	0	0	0	0	0	0	0	0	0	0	45	0	0	0	0	0	0	Bacteria	Pseudomonadota	Gammaproteobacteria	Chromatiales	Sedimenticolaceae
ASV361	0	0	0	0	0	0	0	44	0	0	0	0	0	0	0	0	0	0	0	0	0	0	0	Bacteria	Pseudomonadota	Gammaproteobacteria	Burkholderiales	Alcaligenaceae
ASV362	0	0	0	0	0	0	0	43	0	0	0	0	0	0	0	0	0	0	0	0	0	0	0	Bacteria	Pseudomonadota	Alphaproteobacteria	Hyphomicrobiales	Beijerinckiaceae
ASV363	0	0	0	0	0	0	0	43	0	0	0	0	0	0	0	0	0	0	0	0	0	0	0	Bacteria	Campylobacterota	Campylobacteria	Campylobacterales	Sulfurimonadaceae
ASV364	0	0	0	0	0	0	0	0	0	0	0	43	0	0	0	0	0	0	0	0	0	0	0	Bacteria	Pseudomonadota	Gammaproteobacteria	Pseudomonadales	Pseudomonadaceae
ASV365	0	0	0	0	0	0	0	0	0	0	0	0	0	0	43	0	0	0	0	0	0	0	0	Bacteria	Thermodesulfobacteriota	Dissulfuribacteria	Dissulfuribacterales	Dissulfuribacteraceae
ASV366	0	0	0	0	0	0	0	0	0	0	0	0	0	0	0	0	0	0	0	0	0	43	0	Bacteria	Patescibacteria	Gracilibacteria	Incertae Sedis	Incertae Sedis
ASV367	42	0	0	0	0	0	0	0	0	0	0	0	0	0	0	0	0	0	0	0	0	0	0	Bacteria	Actinomycetota	Actinobacteria	Propionibacteriales	Propionibacteriaceae
ASV368	0	42	0	0	0	0	0	0	0	0	0	0	0	0	0	0	0	0	0	0	0	0	0	Bacteria	Pseudomonadota	Gammaproteobacteria	UBA10353 marine group	Incertae Sedis
ASV369	0	0	0	0	0	0	42	0	0	0	0	0	0	0	0	0	0	0	0	0	0	0	0	Bacteria	Pseudomonadota	Gammaproteobacteria	Pseudomonadales	Moraxellaceae
ASV370	0	0	0	0	0	0	0	0	0	0	0	0	0	0	0	0	0	0	0	0	42	0	0	Bacteria	Bacillota	Clostridia	Oscillospirales	Oscillospiraceae
ASV371	0	0	0	0	41	0	0	0	0	0	0	0	0	0	0	0	0	0	0	0	0	0	0	Bacteria	Pseudomonadota	Alphaproteobacteria	Rhodobacterales	Paracoccaceae
ASV372	0	0	0	0	0	0	0	41	0	0	0	0	0	0	0	0	0	0	0	0	0	0	0	Bacteria	Pseudomonadota	Gammaproteobacteria	Gammaproteobacteria Incertae Sedis	Unknown Family
ASV373	0	0	0	0	0	0	0	0	0	0	0	0	0	0	0	0	0	0	0	0	0	41	0	Bacteria	Patescibacteria	Gracilibacteria	JGI 0000069-P22	Incertae Sedis
ASV374	0	0	0	0	0	0	0	0	0	0	0	0	0	0	0	0	0	40	0	0	0	0	0	Bacteria	Pseudomonadota	Gammaproteobacteria	Pseudomonadales	Pseudomonadaceae
ASV375	0	0	0	0	0	0	0	0	0	0	0	0	0	0	0	0	0	0	40	0	0	0	0	Bacteria	Campylobacterota	Campylobacteria	Campylobacterales	Sulfurovaceae
ASV376	0	0	0	0	0	0	0	0	0	0	40	0	0	0	0	0	0	0	0	0	0	0	0	Bacteria	Pseudomonadota	Zetaproteobacteria	Mariprofundales	Mariprofundaceae
ASV377	0	0	0	0	0	0	0	40	0	0	0	0	0	0	0	0	0	0	0	0	0	0	0	Bacteria	Pseudomonadota	Zetaproteobacteria	Mariprofundales	Mariprofundaceae
ASV378	0	0	0	0	0	0	39	0	0	0	0	0	0	0	0	0	0	0	0	0	0	0	0	Bacteria	Pseudomonadota	Alphaproteobacteria	Hyphomicrobiales	Devosiaceae
ASV379	0	0	0	0	0	0	0	0	0	0	0	0	0	0	0	0	39	0	0	0	0	0	0	Bacteria	Pseudomonadota	Gammaproteobacteria	Beggiatoales	Leucotrichaceae
ASV380	0	0	0	0	0	0	36	0	0	0	0	0	0	0	0	0	0	0	3	0	0	0	0	Bacteria	Thermodesulfobacteriota	Desulfobulbia	Desulfobulbales	Desulfobulbaceae
ASV381	0	38	0	0	0	0	0	0	0	0	0	0	0	0	0	0	0	0	0	0	0	0	0	Bacteria	Pseudomonadota	Gammaproteobacteria	Beggiatoales	Leucotrichaceae
ASV382	0	0	0	0	38	0	0	0	0	0	0	0	0	0	0	0	0	0	0	0	0	0	0	Bacteria	Thermodesulfobacteriota	Desulfobulbia	Desulfobulbales	Desulfobulbaceae
ASV383	0	0	0	0	0	0	0	0	0	0	0	0	0	0	38	0	0	0	0	0	0	0	0	Bacteria	Bacteroidota	Bacteroidia	Bacteroidales	SB-5
ASV384	0	0	37	0	0	0	0	0	0	0	0	0	0	0	0	0	0	0	0	0	0	0	0	Bacteria	Thermodesulfobacteriota	Desulfobacteria	Desulfobacterales	Desulfosarcinaceae
ASV385	0	0	0	0	0	0	0	37	0	0	0	0	0	0	0	0	0	0	0	0	0	0	0	Bacteria	Campylobacterota	Campylobacteria	Campylobacterales	Sulfurimonadaceae
ASV386	0	0	0	0	0	0	36	0	0	0	0	0	0	0	0	0	0	0	0	0	0	0	0	Bacteria	Pseudomonadota	Gammaproteobacteria	Methylococcales	Methylomonadaceae
ASV387	0	0	0	0	0	0	0	0	0	0	0	18	0	0	0	0	0	0	0	0	0	0	18	Bacteria	Pseudomonadota	Gammaproteobacteria	Pseudomonadales	Moraxellaceae
ASV388	0	0	0	0	0	0	0	0	0	0	0	0	0	0	0	0	0	0	0	0	36	0	0	Bacteria	Patescibacteria	Parcubacteria	Candidatus Kaiserbacteria	Incertae Sedis
ASV389	0	0	0	0	0	0	0	0	0	0	0	0	0	0	0	0	0	0	0	0	0	0	36	Bacteria	Patescibacteria	Gracilibacteria	JGI 0000069-P22	Incertae Sedis
ASV390	0	0	0	0	0	0	0	0	0	0	0	0	0	0	0	35	0	0	0	0	0	0	0	Bacteria	Bdellovibrionota	Bdellovibrionia	Bdellovibrionales	Pseudobdellovibrionaceae
ASV391	0	0	0	0	0	0	0	0	0	0	0	0	0	0	0	0	0	0	0	0	0	0	35	Bacteria	Campylobacterota	Campylobacteria	Nautiliales	Nautiliaceae
ASV392	0	0	35	0	0	0	0	0	0	0	0	0	0	0	0	0	0	0	0	0	0	0	0	Bacteria	Pseudomonadota	Gammaproteobacteria	Pseudomonadales	Halieaceae
ASV393	0	0	0	0	0	0	0	0	0	0	0	0	0	0	34	1	0	0	0	0	0	0	0	Bacteria	Bacteroidota	Bacteroidia	Flavobacteriales	Flavobacteriaceae
ASV394	0	0	0	0	0	0	0	34	0	0	0	0	0	0	0	0	0	0	0	0	0	0	0	Bacteria	Pseudomonadota	Gammaproteobacteria	Enterobacterales	Vibrionaceae
ASV395	0	0	0	0	0	0	0	0	0	0	34	0	0	0	0	0	0	0	0	0	0	0	0	Bacteria	Bacillota	Clostridia	Lachnospirales	Lachnospiraceae
ASV396	0	0	0	0	0	0	0	0	0	0	0	0	0	0	0	34	0	0	0	0	0	0	0	Bacteria	Bacillota	Clostridia	Lachnospirales	Lachnospiraceae
ASV397	0	0	0	0	0	0	0	0	0	0	0	0	0	0	0	0	34	0	0	0	0	0	0	Bacteria	Pseudomonadota	Gammaproteobacteria	Pseudomonadales	Moraxellaceae
ASV398	0	0	0	0	0	0	0	0	0	0	0	0	0	0	0	0	0	0	0	7	27	0	0	Bacteria	Patescibacteria	Parcubacteria	Candidatus Campbellbacteria	Incertae Sedis
ASV399	0	0	0	0	0	0	0	0	0	0	0	0	0	0	0	0	0	0	0	0	0	34	0	Bacteria	Campylobacterota	Campylobacteria	Campylobacterales	Sulfurovaceae
ASV400	15	0	3	8	0	0	0	0	0	0	0	0	0	8	0	0	0	0	0	0	0	0	0	Bacteria	Bacteroidota	Bacteroidia	Flavobacteriales	Flavobacteriaceae
ASV401	0	0	0	0	0	0	0	0	0	7	0	0	0	0	0	8	1	0	17	0	0	0	0	Bacteria	Bacteroidota	Bacteroidia	Flavobacteriales	Flavobacteriaceae
ASV402	0	0	0	33	0	0	0	0	0	0	0	0	0	0	0	0	0	0	0	0	0	0	0	Bacteria	Patescibacteria	Gracilibacteria	JGI 0000069-P22	Incertae Sedis
ASV403	0	0	0	0	0	0	33	0	0	0	0	0	0	0	0	0	0	0	0	0	0	0	0	Bacteria	Pseudomonadota	Gammaproteobacteria	Enterobacterales	Psychromonadaceae
ASV404	0	0	0	0	0	0	0	0	0	0	18	0	0	0	0	4	2	0	4	4	0	0	0	Bacteria	Bacteroidota	Bacteroidia	Flavobacteriales	Flavobacteriaceae
ASV405	0	0	32	0	0	0	0	0	0	0	0	0	0	0	0	0	0	0	0	0	0	0	0	Bacteria	Bacteroidota	Bacteroidia	Sphingobacteriales	Lentimicrobiaceae
ASV406	0	0	0	0	0	0	31	0	0	0	0	0	0	0	0	0	0	0	0	0	0	0	0	Bacteria	Pseudomonadota	Gammaproteobacteria	Gammaproteobacteria Incertae Sedis	Unknown Family
ASV407	0	0	0	0	0	0	0	0	0	0	0	0	0	0	0	31	0	0	0	0	0	0	0	Bacteria	Campylobacterota	Campylobacteria	Campylobacterales	Sulfurovaceae
ASV408	0	0	0	0	0	0	0	0	0	0	0	0	0	0	0	0	0	0	31	0	0	0	0	Bacteria	Campylobacterota	Campylobacteria	Campylobacterales	Sulfurimonadaceae
ASV409	0	0	0	0	0	0	0	30	0	0	0	0	0	0	0	0	0	0	0	0	0	0	0	Bacteria	Deferribacterota	Deferribacteres	Deferribacterales	Deferribacteraceae
ASV410	0	0	0	0	0	0	30	0	0	0	0	0	0	0	0	0	0	0	0	0	0	0	0	Bacteria	Bacteroidota	Bacteroidia	Flavobacteriales	Flavobacteriaceae
ASV411	0	30	0	0	0	0	0	0	0	0	0	0	0	0	0	0	0	0	0	0	0	0	0	Bacteria	Bacteroidota	Bacteroidia	Bacteroidetes VC2.1 Bac22	Incertae Sedis
ASV412	0	0	0	0	0	0	0	0	0	0	0	0	29	0	0	0	0	0	0	0	0	0	0	Bacteria	Patescibacteria	Gracilibacteria
ASV413	0	29	0	0	0	0	0	0	0	0	0	0	0	0	0	0	0	0	0	0	0	0	0	Bacteria	Bacteroidota	Bacteroidia	Flavobacteriales	Crocinitomicaceae
ASV414	0	0	0	0	0	0	0	0	0	0	0	0	0	0	0	29	0	0	0	0	0	0	0	Bacteria	Bacillota	Clostridia	Lachnospirales	Lachnospiraceae
ASV415	0	0	0	0	0	0	0	0	0	0	0	0	0	0	29	0	0	0	0	0	0	0	0	Bacteria	Campylobacterota	Campylobacteria	Campylobacterales	Hydrogenimonadaceae
ASV416	0	0	0	0	0	0	0	0	0	0	0	0	0	0	0	0	0	0	0	0	29	0	0	Bacteria	Bacillota	Clostridia	Oscillospirales	Ruminococcaceae
ASV417	0	0	0	0	0	0	0	0	0	0	0	29	0	0	0	0	0	0	0	0	0	0	0	Bacteria	Cyanobacteriota	Cyanobacteriia	Cyanobacteriales	Nostocaceae
ASV418	0	0	0	0	0	0	29	0	0	0	0	0	0	0	0	0	0	0	0	0	0	0	0	Bacteria	Pseudomonadota	Gammaproteobacteria	Nitrosococcales	Methylophagaceae
ASV419	0	0	0	29	0	0	0	0	0	0	0	0	0	0	0	0	0	0	0	0	0	0	0	Bacteria	Thermodesulfobacteriota	Desulfobacteria	Desulfobacterales	Desulfosarcinaceae
ASV420	0	28	0	0	0	0	0	0	0	0	0	0	0	0	0	0	0	0	0	0	0	0	0	Bacteria	Bacteroidota	Bacteroidia	Bacteroidales	Prolixibacteraceae
ASV421	0	0	0	0	0	0	0	0	0	0	0	28	0	0	0	0	0	0	0	0	0	0	0	Bacteria	Deferribacterota	Deferribacteres	Deferribacterales	Deferribacteraceae
ASV422	0	0	0	0	0	0	0	0	0	0	0	0	0	0	0	0	0	28	0	0	0	0	0	Bacteria	Thermodesulfobacteriota	Desulfobulbia	Desulfobulbales	Desulfobulbaceae
ASV423	0	0	0	0	0	0	0	0	0	0	0	0	0	0	2	0	0	8	8	2	8	0	0	Bacteria	Bacteroidota	Bacteroidia	Bacteroidales	Marinifilaceae
ASV424	0	0	0	0	0	0	27	0	0	0	0	0	0	0	0	0	0	0	0	0	0	0	0	Bacteria	Pseudomonadota	Zetaproteobacteria	Mariprofundales	Mariprofundaceae
ASV425	0	0	0	0	0	0	27	0	0	0	0	0	0	0	0	0	0	0	0	0	0	0	0	Bacteria	Pseudomonadota	Alphaproteobacteria	Rhodobacterales	Paracoccaceae
ASV426	0	0	0	0	0	0	0	0	0	0	27	0	0	0	0	0	0	0	0	0	0	0	0	Bacteria	Bacteroidota	Bacteroidia	Flavobacteriales	Crocinitomicaceae
ASV427	0	0	0	0	0	0	0	0	0	0	0	0	0	0	0	0	27	0	0	0	0	0	0	Bacteria	Thermodesulfobacteriota	Desulfobulbia	Desulfobulbales	Desulfobulbaceae
ASV428	0	0	0	0	0	0	0	0	0	0	0	0	0	0	0	0	0	0	0	0	0	27	0	Bacteria	Bacteroidota	Bacteroidia	Flavobacteriales	Flavobacteriaceae
ASV429	0	0	0	0	0	0	0	0	0	0	0	0	0	0	0	26	0	0	0	0	0	0	0	Bacteria	Spirochaetota	Brachyspirae	Brachyspirales	Brachyspiraceae
ASV430	0	0	0	0	0	0	0	0	0	0	0	0	0	0	0	0	0	0	0	0	0	0	26	Bacteria	Pseudomonadota	Gammaproteobacteria	Gammaproteobacteria Incertae Sedis	Unknown Family
ASV431	0	26	0	0	0	0	0	0	0	0	0	0	0	0	0	0	0	0	0	0	0	0	0	Bacteria	Pseudomonadota	Gammaproteobacteria	Ectothiorhodospirales	Ectothiorhodospiraceae
ASV432	0	0	0	0	0	0	0	26	0	0	0	0	0	0	0	0	0	0	0	0	0	0	0	Bacteria	Pseudomonadota	Zetaproteobacteria	Mariprofundales	Mariprofundaceae
ASV433	0	0	0	0	26	0	0	0	0	0	0	0	0	0	0	0	0	0	0	0	0	0	0	Bacteria	Pseudomonadota	Gammaproteobacteria	Beggiatoales	Leucotrichaceae
ASV434	0	0	0	0	0	0	0	26	0	0	0	0	0	0	0	0	0	0	0	0	0	0	0	Bacteria	Pseudomonadota	Zetaproteobacteria	Mariprofundales	Mariprofundaceae
ASV435	0	0	0	0	0	0	0	0	0	0	0	0	0	0	0	25	0	0	0	0	0	0	0	Bacteria	Bacillota	Bacilli	Lactobacillales	Streptococcaceae
ASV436	0	0	0	0	0	0	0	0	0	0	0	0	0	0	0	25	0	0	0	0	0	0	0	Bacteria	Pseudomonadota	Gammaproteobacteria	Burkholderiales	Alcaligenaceae
ASV437	0	0	0	0	0	0	24	0	0	0	0	0	0	0	0	0	0	0	0	0	0	0	0	Bacteria	Pseudomonadota	Gammaproteobacteria	Pseudomonadales	Moraxellaceae
ASV438	0	0	0	0	0	0	0	0	0	0	0	0	0	0	0	0	24	0	0	0	0	0	0	Bacteria	Pseudomonadota	Gammaproteobacteria	Burkholderiales	Oxalobacteraceae
ASV439	0	0	0	0	0	0	0	0	0	0	0	0	0	0	0	0	24	0	0	0	0	0	0	Bacteria	Pseudomonadota	Gammaproteobacteria	Pseudomonadales	Pseudomonadaceae
ASV440	24	0	0	0	0	0	0	0	0	0	0	0	0	0	0	0	0	0	0	0	0	0	0	Bacteria	Pseudomonadota	Gammaproteobacteria	UBA10353 marine group	Incertae Sedis
ASV441	0	0	0	0	0	0	0	0	23	0	0	0	0	0	0	0	0	0	0	0	0	0	0	Bacteria	Pseudomonadota	Gammaproteobacteria	Enterobacterales	Colwelliaceae
ASV442	0	0	0	0	0	0	22	0	0	0	0	0	0	0	0	0	0	0	0	0	0	0	0	Bacteria	Thermodesulfobacteriota	Desulfobulbia	Desulfobulbales	Desulfobulbaceae
ASV443	0	0	0	0	0	0	22	0	0	0	0	0	0	0	0	0	0	0	0	0	0	0	0	Bacteria	Patescibacteria	Parcubacteria	Candidatus Kaiserbacteria	Incertae Sedis
ASV444	0	0	0	0	0	0	0	22	0	0	0	0	0	0	0	0	0	0	0	0	0	0	0	Bacteria	Pseudomonadota	Gammaproteobacteria	Enterobacterales	Enterobacteriaceae
ASV445	0	0	0	0	0	0	0	22	0	0	0	0	0	0	0	0	0	0	0	0	0	0	0	Bacteria	Pseudomonadota	Alphaproteobacteria	Hyphomicrobiales	Thermopetrobacteraceae
ASV446	0	0	0	0	0	0	0	0	0	0	0	0	0	0	0	18	0	0	4	0	0	0	0	Bacteria	Pseudomonadota	Gammaproteobacteria	Pseudomonadales	Pseudomonadaceae
ASV447	0	0	22	0	0	0	0	0	0	0	0	0	0	0	0	0	0	0	0	0	0	0	0	Bacteria	Patescibacteria	Gracilibacteria	Incertae Sedis	Incertae Sedis
ASV448	0	0	0	0	0	0	0	0	0	0	0	0	0	0	0	21	0	0	0	0	0	0	0	Bacteria	Pseudomonadota	Gammaproteobacteria	Burkholderiales	Oxalobacteraceae
ASV449	0	0	0	0	0	21	0	0	0	0	0	0	0	0	0	0	0	0	0	0	0	0	0	Bacteria	Pseudomonadota	Gammaproteobacteria	Beggiatoales	Leucotrichaceae
ASV450	0	0	0	0	0	0	0	0	0	0	0	0	0	0	0	0	0	0	20	0	0	0	0	Bacteria	Pseudomonadota	Gammaproteobacteria	Pseudomonadales	Pseudomonadaceae
ASV451	20	0	0	0	0	0	0	0	0	0	0	0	0	0	0	0	0	0	0	0	0	0	0	Bacteria	Pseudomonadota	Gammaproteobacteria	Beggiatoales	Leucotrichaceae
ASV452	0	0	0	0	0	0	0	0	0	0	0	0	0	0	0	0	0	0	0	0	20	0	0	Bacteria	Pseudomonadota	Gammaproteobacteria	UBA10353 marine group	Incertae Sedis
ASV453	0	0	0	0	0	0	0	0	0	0	0	0	0	0	0	0	0	0	0	20	0	0	0	Bacteria	Patescibacteria	Gracilibacteria	JGI 0000069-P22	Incertae Sedis
ASV454	0	0	0	0	0	0	0	0	0	0	0	0	0	0	0	0	0	0	0	0	0	0	20	Bacteria	Pseudomonadota	Gammaproteobacteria	Pseudomonadales	Pseudomonadaceae
ASV455	0	0	0	0	0	0	0	0	0	20	0	0	0	0	0	0	0	0	0	0	0	0	0	Bacteria	Campylobacterota	Campylobacteria	Campylobacterales	Arcobacteraceae
ASV456	0	0	0	0	0	0	20	0	0	0	0	0	0	0	0	0	0	0	0	0	0	0	0	Bacteria	Pseudomonadota	Gammaproteobacteria	Enterobacterales	Psychromonadaceae
ASV457	0	0	20	0	0	0	0	0	0	0	0	0	0	0	0	0	0	0	0	0	0	0	0	Bacteria	Pseudomonadota	Alphaproteobacteria	Hyphomicrobiales	Rhizobiaceae
ASV458	0	19	0	0	0	0	0	0	0	0	0	0	0	0	0	0	0	0	0	0	0	0	0	Bacteria	Patescibacteria	Gracilibacteria	Incertae Sedis	Incertae Sedis
ASV459	0	0	19	0	0	0	0	0	0	0	0	0	0	0	0	0	0	0	0	0	0	0	0	Bacteria	Bacteroidota	Bacteroidia	Flavobacteriales	Flavobacteriaceae
ASV460	0	0	0	0	19	0	0	0	0	0	0	0	0	0	0	0	0	0	0	0	0	0	0	Bacteria
ASV461	0	0	0	0	0	0	0	0	11	0	8	0	0	0	0	0	0	0	0	0	0	0	0	Bacteria	Bacteroidota	Bacteroidia	Flavobacteriales	Flavobacteriaceae
ASV462	0	0	0	0	0	0	0	0	0	0	0	0	0	0	0	18	0	0	0	0	0	0	0	Bacteria	Pseudomonadota	Gammaproteobacteria	Pseudomonadales	Pseudomonadaceae
ASV463	0	0	0	0	0	0	0	0	0	0	0	0	0	0	0	0	0	0	0	0	0	0	18	Bacteria	Campylobacterota	Campylobacteria	Campylobacterales	Sulfurovaceae
ASV464	0	0	0	0	0	0	0	0	0	0	0	0	0	0	0	0	0	0	0	0	0	18	0	Bacteria	Bacteroidota	Bacteroidia	Flavobacteriales	Flavobacteriaceae
ASV465	0	0	0	0	0	0	0	0	0	0	0	0	0	0	0	18	0	0	0	0	0	0	0	Bacteria	Deferribacterota	Deferribacteres	Deferribacterales	Deferribacteraceae
ASV466	0	0	0	0	0	0	0	0	0	0	0	0	0	18	0	0	0	0	0	0	0	0	0	Bacteria	Actinomycetota	Coriobacteriia	Coriobacteriales	Coriobacteriaceae
ASV467	0	0	0	0	0	0	0	0	18	0	0	0	0	0	0	0	0	0	0	0	0	0	0	Bacteria	Bacillota	Bacilli	Staphylococcales	Staphylococcaceae
ASV468	0	0	0	0	0	0	0	0	0	0	0	0	0	18	0	0	0	0	0	0	0	0	0	Bacteria	Pseudomonadota	Gammaproteobacteria	Pseudomonadales	Pseudomonadaceae
ASV469	0	0	0	0	1	0	0	0	0	0	0	0	17	0	0	0	0	0	0	0	0	0	0	Bacteria	Bacteroidota	Bacteroidia	Flavobacteriales	Flavobacteriaceae
ASV470	0	0	0	0	0	0	0	0	0	0	0	0	0	0	0	0	0	0	0	0	17	0	0	Bacteria	Chloroflexota	Anaerolineae	SJA-15	Incertae Sedis
ASV471	0	0	17	0	0	0	0	0	0	0	0	0	0	0	0	0	0	0	0	0	0	0	0	Bacteria	Bacteroidota	Bacteroidia	Bacteroidetes VC2.1 Bac22	Incertae Sedis
ASV472	17	0	0	0	0	0	0	0	0	0	0	0	0	0	0	0	0	0	0	0	0	0	0	Bacteria	Campylobacterota	Campylobacteria	Campylobacterales	Sulfurovaceae
ASV473	17	0	0	0	0	0	0	0	0	0	0	0	0	0	0	0	0	0	0	0	0	0	0	Bacteria	Pseudomonadota	Gammaproteobacteria	Beggiatoales	Leucotrichaceae
ASV474	0	0	0	0	0	0	16	0	0	0	0	0	0	0	0	0	0	0	0	0	0	0	0	Bacteria	Patescibacteria	Gracilibacteria	JGI 0000069-P22	Incertae Sedis
ASV475	15	0	0	0	0	0	0	0	0	0	0	0	0	0	0	0	0	0	0	0	0	0	0	Bacteria	Pseudomonadota	Alphaproteobacteria	Rhodobacterales	Paracoccaceae
ASV476	0	0	15	0	0	0	0	0	0	0	0	0	0	0	0	0	0	0	0	0	0	0	0	Bacteria	Bacteroidota	Bacteroidia	Flavobacteriales	Flavobacteriaceae
ASV477	0	0	0	0	0	0	0	15	0	0	0	0	0	0	0	0	0	0	0	0	0	0	0	Bacteria	Pseudomonadota	Gammaproteobacteria	Methylococcales	Methylomonadaceae
ASV478	0	0	0	0	0	0	0	0	0	0	0	0	0	14	0	0	0	0	0	0	0	0	0	Bacteria	Pseudomonadota	Gammaproteobacteria	Enterobacterales	Yersiniaceae
ASV479	0	0	0	0	0	0	0	0	0	0	0	0	0	14	0	0	0	0	0	0	0	0	0	Bacteria	Pseudomonadota	Gammaproteobacteria	Lysobacterales	Rhodanobacteraceae
ASV480	0	0	0	0	0	0	14	0	0	0	0	0	0	0	0	0	0	0	0	0	0	0	0	Unassigned
ASV481	14	0	0	0	0	0	0	0	0	0	0	0	0	0	0	0	0	0	0	0	0	0	0	Bacteria	Patescibacteria	Gracilibacteria	JGI 0000069-P22	Incertae Sedis
ASV482	0	1	0	0	0	0	0	1	0	0	0	0	12	0	0	0	0	0	0	0	0	0	0	Bacteria	Bacteroidota	Bacteroidia	Flavobacteriales	Flavobacteriaceae
ASV483	0	0	0	0	0	0	0	0	0	13	0	0	0	0	0	0	0	0	0	0	0	0	0	Bacteria	Campylobacterota	Campylobacteria	Campylobacterales	Sulfurovaceae
ASV484	0	0	0	0	0	0	0	0	0	0	0	0	0	0	13	0	0	0	0	0	0	0	0	Bacteria	Pseudomonadota	Alphaproteobacteria	Hyphomicrobiales	Thermopetrobacteraceae
ASV485	0	0	0	0	0	0	0	0	0	0	0	0	0	0	0	13	0	0	0	0	0	0	0	Bacteria	Bacillota	Clostridia	Oscillospirales	Oscillospiraceae
ASV486	0	0	0	0	0	0	0	0	0	0	0	0	0	0	0	0	0	0	0	0	0	0	11	Bacteria	Bacillota	Clostridia	Lachnospirales	Lachnospiraceae
ASV487	0	0	11	0	0	0	0	0	0	0	0	0	0	0	0	0	0	0	0	0	0	0	0	Bacteria	Bacteroidota	Bacteroidia	Cytophagales	Cyclobacteriaceae
ASV488	0	0	0	0	0	0	10	0	0	0	0	0	0	0	0	0	0	0	0	0	0	0	0	Bacteria	Pseudomonadota	Gammaproteobacteria	Enterobacterales	Psychromonadaceae
ASV489	0	0	0	0	0	0	0	0	0	0	0	10	0	0	0	0	0	0	0	0	0	0	0	Bacteria	Patescibacteria	Gracilibacteria	Incertae Sedis	Incertae Sedis
ASV490	0	0	0	0	0	0	0	0	0	0	0	0	0	0	0	0	0	0	0	0	9	0	0	Bacteria	Bacillota	Clostridia	Peptostreptococcales-Tissierellales	Family XI
ASV491	0	0	0	0	0	0	1	8	0	0	0	0	0	0	0	0	0	0	0	0	0	0	0	Bacteria	Bacillota	Bacilli	Staphylococcales	Staphylococcaceae
ASV492	0	0	0	0	0	0	9	0	0	0	0	0	0	0	0	0	0	0	0	0	0	0	0	Bacteria	Patescibacteria	Gracilibacteria	JGI 0000069-P22	Incertae Sedis
ASV493	9	0	0	0	0	0	0	0	0	0	0	0	0	0	0	0	0	0	0	0	0	0	0	Bacteria	Pseudomonadota	Gammaproteobacteria	Enterobacterales	Vibrionaceae
ASV494	0	0	0	0	0	0	9	0	0	0	0	0	0	0	0	0	0	0	0	0	0	0	0	Bacteria	Pseudomonadota	Alphaproteobacteria	Rhodobacterales	Paracoccaceae
ASV495	0	0	0	0	0	0	0	0	0	0	0	0	0	0	0	0	0	0	0	0	8	0	0	Bacteria	Bacillota	Bacilli	Erysipelotrichales	Erysipelatoclostridiaceae
ASV496	0	0	0	0	7	0	0	0	0	0	0	0	0	0	0	0	0	0	0	0	0	0	0	Bacteria	Thermodesulfobacteriota	Desulfobacteria	Desulfobacterales	Desulfosarcinaceae
ASV497	0	6	0	0	0	0	0	0	0	0	0	0	0	0	0	0	0	0	0	0	0	0	0	Bacteria	Bacteroidota	Bacteroidia	Bacteroidetes VC2.1 Bac22	Incertae Sedis
ASV498	0	0	0	0	0	0	0	0	0	0	0	0	0	5	0	0	0	0	0	0	0	0	0	Bacteria	Pseudomonadota	Gammaproteobacteria
Percentage of Lachnospirales within R. chacei and R. exoculata adult specimens from BICOSE2014 cruise
R. chacei adult	R. exoculata adult
	Others
TAG
0.001 ± 0.002	2.14 ± 1.18
Per triplicate:	Per triplicate:
0.002%, 0%	0.86%, 2.13%, 3.33%
Snake Pit
0.25 ± 0.31
Per triplicate:
0.0007%, 0.60%, 0.16%
Permanova on Unifrac (R. chacei and R. exoculata adult specimens from BICOSE2014 cruise)
	R2	Pr(>F)	Significance
site	19.68	0.001	***
species	12.51	0.001	***
Residuals	67.80
Permanova on Weighted Unifrac (R. chacei and R. exoculata adult specimens from BICOSE2014 cruise)
	R2	Pr(>F)	Significance
site	19.73	0.001	***
species	19.51	0.001	***
Residuals	60.76
ANCOM-BC -second metabarcoding analysis (R. chacei and R. exoculata adult specimens from BICOSE2014 cruise)
taxon	Rimicaris_exoculata_lfc	Rimicaris_exoculata_padjvalue	Rimicaris_exoculata_signif
ASV17	5.03347598477433	9.93180389158317e-05	***

## Sheet: Supplementary Table 5
ANCOM-BC analysis (R. chacei and R. exoculata juvenile specimens and R. exoculata adult specimens)
taxon	_A_lfc	_A_padjvalue	_A_signif	_B_lfc	_B_padjvalue	_B_signif	subadult_lfc	subadult_padjvalue	subadult_signif
ASV72	-2.54310949958204	1	ns	-0.327816902755815	1	ns	-0.990728603591775	1	ns
ASV397	-2.33028299811912	0.0315023820364483	*	-2.28601612666564	0.0402651336978703	*	-2.47924227122067	0.0116474232891609	*
ASV703	-1.4140796163546	1	ns	-1.05744741894019	1	ns	-0.385189741077108	1	ns

## Sheet: Supplementary Table 6
Pathway	Enzyme name	Gene name	Kofam	EC number
Glycolysis	glucokinase	glcK	K25026	2.7.1.2
	G6P isomerase	pgi	K01810	5.3.1.9
	6-phosphofructokinase I	pfkA	K00850	2.7.1.11
	F1,6 BP aldolase	fba	K01624	4.1.2.13
	Triose P isomerase	tpiA	K01803	5.3.1.1
	G3P DH	gapA	K00134	1.2.1.12
	phosphoglycerate kinase	pgk	K00927	2.7.2.3
	2,3 biphosphogylcerate independant phosphoglycerate mutase	gpmI	K15633	5.4.2.12
	enolase	eno	K01689	4.2.1.11
	pyruvate kinase	pykF	K00873	2.7.1.40
Neoglycogenesis	Carboxykinase	missing
	enolase	eno	K01689	4.2.1.11
	phosphoglycerate mutase	gpmI	K15633	5.4.2.12
	phosphoglycerate kinase	pgk	K00927	2.7.2.3
	G3PDH	gapA	K00134	1.2.1.12
	Triose P isomerase	tpiA	K01803	5.3.1.1
	F1,6 BP aldolase	fba	K01624	4.1.2.13
	F1,6 BP biphosphatase	missing
Pentose phosphate pathway (non-oxidative branch)	Tranketolase	tktA, tktB	K00615	2.2.1.1
	Transaldolase/G6P isomerase	tal-pgi	K13810	2.2.1.2/5.3.1.9
	ribulose-phosphate 3-epimerase	rpe	K01783	5.1.3.1
	ribose 5-phosphate isomerase B	rpiB	K01808	5.3.1.6
PRPP biosynthesis, ribose 5P => PRPP	ribose-phosphate pyrophosphokinase	prsA	K00948	2.7.6.1
Glycogen biosynthesis	Glucose-1-phosphate adenylyltransferase	glgC	K00975	2.7.7.27
	Glycogen synthase	glgA	K00703	2.4.1.21
	1,4-alpha-glucan branching enzyme	glgB	K00700	2.4.1.18
Glycogen degradation	glycogen phosphorylase	glgP	K00688	2.4.1.1
	4-alpha-glucanotransferase	malQ	K00705	2.4.1.25
Pyruvate oxidation	Pyruvate:ferredoxin oxidoreductase	por	K03737	1.2.7.1
Chitin degradation	Chitinase	chiA	K01183	3.2.1.14
	beta-N-acetylhexosaminidase	nagZ	K01207	3.2.1.52
CBB	Tranketolase	tktA, tktB	K00615	2.2.1.1
	Fructose BP aldolase	fbaA	K01624	4.1.2.13
	transaldolase / glucose-6-phosphate isomerase	tal-pgi	K13810	5.3.1.9
	ribose 5 phosphate isomerase	rpiB	K01808	5.3.1.6
	ribulose-phosphate 3-epimerase	rpe	K01783	5.1.3.1
	phosphoribulokinase	missing	K00855
	RuBisCO	missing	K01601/K01602
	phosphoglycerate kinase	pgk	K00927	2.7.2.3
	G3PDH	gapA	K00134	1.2.1.12
	triosephosphate isomerase	tpiA	K01803	3.1.3.11
	sedoheptulose-1,7-bisphosphatase	missing
	fructose-1,6-bisphosphatase	missing
Pyruvate --> AOA	pyruvate carboxylase	pycB	K01960	6.4.4.1
Phosphate acetyltransferase -acetate kinase pathway	phosphate acetyltransferase	pta	K00625	2.3.1.8
	acetate kinase	ackA	K00925	2.7.2.1
F-type ATPase		atpA, atpB, atpC, atpD, atpE, atpF, atpG, atpH	K02108,K02109,K02110,K02111,K02112,K02113,K02114,K02115
PTS system	Phosphoenolpyruvate-protein phosphotransferase	ptsI	K08483	2.7.3.9
	Phosphocarrier protein HPr	ptsH	K02784
	PTS system glucose-specific EIIA component	crr	K02777
	N-acetylmuramic acid PTS system EIICB component	murP	K11192	2.7.1.192
	PTS system N-acetylglucosamine-specific EIICBA component	nagE	K02804	2.7.1.193
GlcNAc6P degradation and cell wall formation	putative glucosamine deaminase	gamA	K02564	3.5.99.6
	N-acetylglucosamine 6P deacetylase	nagA	K01443	3.5.1.25
	phosphoglucosamine mutase	glmM	K03431	5.4.2.10
		glmU
		murA
		murB
		murC
		murD
		murE, murF, mraY, murG, mtgA
		murQ ?
	peptidoglycane glycosyltransferase	mrdA
	peptidoglycane D,D-transpeptidase	mrdD
Motility		FliS, D_C, D_N, L, R, Q, P, O, Z, N,Y, M, H, G, E
		FlaG
		FlgM, K, D, C, G
		FlhF,A, B
		MecA
		MotB
		Flagellin C & M
		CheY
		hag
		PilB, C, T
		ComC
Respiratory chain	dihydroorotate dehydrogenase (DHOD)	pyrDII & I, pyrK	K02823	1.3.1.14
	hydrogenase large SU	hndD, hndA, hndC	K18332, K18330, K183301	1.12.1.3
	cytochrome bd ubiquinol oxidase SU I & II	cydA, cydB	K00425, K00426	7.1.1.7
	NADH dehydrogenase	ndh	K03885	1.6.99.3
Cell division		ftsZ, E, Y, W, L, Q
		mreB_1, B_2, C
		minC, D, E
		parA
SecYEG system	SecA	secA	K03070
	SecE	secE	K03073
	SecY	secY	K03076
	SecG	secG	K03075
Xylose transport	XylG			7.5.2.10
	XylH
Oligopeptide transport	OppF	oopF
	OppD	oppD
Dipeptide transport	DppB	dppB
Biotin transport		bioY2

## Sheet: Supplementary Table 7
KEEG_MODULE_SnakePit
module	genome_name	module_name	module_class	module_category	module_subcategory	module_definition	stepwise_module_completeness	stepwise_module_is_complete	pathwise_module_completeness	pathwise_module_is_complete	proportion_unique_enzymes_present	enzymes_unique_to_module	unique_enzymes_hit_counts	enzyme_hits_in_module	gene_caller_ids_in_module	warnings
M00001	M_SnakePit_MAG_00001_contigs	Glycolysis (Embden-Meyerhof pathway), glucose => pyruvate	Pathway modules	Carbohydrate metabolism	Central carbohydrate metabolism	(K00844,K12407,K00845,K25026,K00886,K08074,K00918) (K01810,K06859,K13810,K15916) (K00850,K16370,K21071,K00918) (K01623,K01624,K11645,K16305,K16306) K01803 ((K00134,K00150) K00927,K11389) (K01834,K15633,K15634,K15635) K01689 (K00873,K12406)	0.8888888888888888	TRUE	0.9	TRUE	NA	No enzymes unique to module	NA	K00134,K00873,K00927,K01624,K01689,K01803,K01810,K15633,K25026	1309,1313,963,649,944,946,538,945,448	K00873 is present in multiple modules: M00001/M00002,K00134 is present in multiple modules: M00001/M00002/M00003/M00308/M00552/M00165/M00166/M00611/M00612,K15633 is present in multiple modules: M00001/M00002/M00003,K00927 is present in multiple modules: M00001/M00002/M00003/M00308/M00552/M00165/M00166/M00611/M00612,K01810 is present in multiple modules: M00001/M00004/M00892/M00909,K01689 is prese…
M00002	M_SnakePit_MAG_00001_contigs	Glycolysis, core module involving three-carbon compounds	Pathway modules	Carbohydrate metabolism	Central carbohydrate metabolism	K01803 ((K00134,K00150) K00927,K11389) (K01834,K15633,K15634,K15635) K01689 (K00873,K12406)	1.0	TRUE	1.0	TRUE	NA	No enzymes unique to module	NA	K00134,K00873,K00927,K01689,K01803,K15633	1309,1313,963,944,946,945	K00873 is present in multiple modules: M00001/M00002,K00134 is present in multiple modules: M00001/M00002/M00003/M00308/M00552/M00165/M00166/M00611/M00612,K15633 is present in multiple modules: M00001/M00002/M00003,K00927 is present in multiple modules: M00001/M00002/M00003/M00308/M00552/M00165/M00166/M00611/M00612,K01689 is present in multiple modules: M00001/M00002/M00003/M00346,K01803 is prese…
M00003	M_SnakePit_MAG_00001_contigs	Gluconeogenesis, oxaloacetate => fructose-6P	Pathway modules	Carbohydrate metabolism	Central carbohydrate metabolism	(K01596,K01610) K01689 (K01834,K15633,K15634,K15635) K00927 (K00134,K00150) K01803 ((K01623,K01624,K11645) (K03841,K02446,K11532,K01086,K04041),K01622)	0.7142857142857143	FALSE	0.75	TRUE	NA	No enzymes unique to module	NA	K00134,K00927,K01624,K01689,K01803,K15633	1309,963,649,944,946,945	K00134 is present in multiple modules: M00001/M00002/M00003/M00308/M00552/M00165/M00166/M00611/M00612,K15633 is present in multiple modules: M00001/M00002/M00003,K00927 is present in multiple modules: M00001/M00002/M00003/M00308/M00552/M00165/M00166/M00611/M00612,K01689 is present in multiple modules: M00001/M00002/M00003/M00346,K01624 is present in multiple modules: M00001/M00003/M00165/M00167/M…
M00307	M_SnakePit_MAG_00001_contigs	Pyruvate oxidation, pyruvate => acetyl-CoA	Pathway modules	Carbohydrate metabolism	Central carbohydrate metabolism	((K00163,K00161+K00162)+K00627+K00382-K13997),K00169+K00170+K00171+(K00172,K00189),K03737	,	TRUE	1.0	TRUE	NA	No enzymes unique to module	NA	K03737	850	K03737 is present in multiple modules: M00307/M00173/M00614
M00009	M_SnakePit_MAG_00001_contigs	Citrate cycle (TCA cycle, Krebs cycle)	Pathway modules	Carbohydrate metabolism	Central carbohydrate metabolism	(K01647,K05942) (K01681,K01682) (K00031,K00030) ((K00164+K00658,K01616)+K00382,K00174+K00175-K00177-K00176) (K01902+K01903,K01899+K01900,K18118) (K00234+K00235+K00236+(K00237,K25801),K00239+K00240+K00241-(K00242,K18859,K18860),K00244+K00245+K00246-K00247) (K01676,K01679,K01677+K01678) (K00026,K00025,K00024,K00116)	0.25	FALSE	0.25	FALSE	NA	No enzymes unique to module	NA	K00174,K00175,K00176,K00177,K01677,K01678	915,916,914,917,925,924	K00176 is present in multiple modules: M00009/M00011/M00173/M00620/M00614,K01678 is present in multiple modules: M00009/M00011/M00173/M00374/M00620/M00613/M00614,K00175 is present in multiple modules: M00009/M00011/M00173/M00620/M00614,K00174 is present in multiple modules: M00009/M00011/M00173/M00620/M00614,K00177 is present in multiple modules: M00009/M00011/M00173/M00620/M00614,K01677 is prese…
M00011	M_SnakePit_MAG_00001_contigs	Citrate cycle, second carbon oxidation, 2-oxoglutarate => oxaloacetate	Pathway modules	Carbohydrate metabolism	Central carbohydrate metabolism	((K00164+K00658,K01616)+K00382,K00174+K00175-K00177-K00176) (K01902+K01903,K01899+K01900,K18118) (K00234+K00235+K00236+(K00237,K25801),K00239+K00240+K00241-(K00242,K18859,K18860),K00244+K00245+K00246-K00247) (K01676,K01679,K01677+K01678) (K00026,K00025,K00024,K00116)	0.4	FALSE	0.4	FALSE	NA	No enzymes unique to module	NA	K00174,K00175,K00176,K00177,K01677,K01678	915,916,914,917,925,924	K00176 is present in multiple modules: M00009/M00011/M00173/M00620/M00614,K01678 is present in multiple modules: M00009/M00011/M00173/M00374/M00620/M00613/M00614,K00175 is present in multiple modules: M00009/M00011/M00173/M00620/M00614,K00174 is present in multiple modules: M00009/M00011/M00173/M00620/M00614,K00177 is present in multiple modules: M00009/M00011/M00173/M00620/M00614,K01677 is prese…
M00004	M_SnakePit_MAG_00001_contigs	Pentose phosphate pathway (Pentose phosphate cycle)	Pathway modules	Carbohydrate metabolism	Central carbohydrate metabolism	(K13937,((K00036,K19243) (K01057,K07404))) K00033 K01783 (K01807,K01808) K00615 ((K00616 (K01810,K06859,K15916)),K13810)	0.5	FALSE	0.5714285714285714	FALSE	NA	No enzymes unique to module	NA	K00615,K01783,K01808,K01810	834,1158,83,538	K00615 is present in multiple modules: M00004/M00007/M00165/M00167/M00611/M00612,K01810 is present in multiple modules: M00001/M00004/M00892/M00909,K01808 is present in multiple modules: M00004/M00007/M00165/M00167/M00611/M00612,K01783 is present in multiple modules: M00004/M00007
M00007	M_SnakePit_MAG_00001_contigs	Pentose phosphate pathway, non-oxidative phase, fructose 6P => ribose 5P	Pathway modules	Carbohydrate metabolism	Central carbohydrate metabolism	K00615 (K00616,K13810) K01783 (K01807,K01808)	0.75	TRUE	0.75	TRUE	NA	No enzymes unique to module	NA	K00615,K01783,K01808	834,1158,83	K00615 is present in multiple modules: M00004/M00007/M00165/M00167/M00611/M00612,K01808 is present in multiple modules: M00004/M00007/M00165/M00167/M00611/M00612,K01783 is present in multiple modules: M00004/M00007
M00005	M_SnakePit_MAG_00001_contigs	PRPP biosynthesis, ribose 5P => PRPP	Pathway modules	Carbohydrate metabolism	Central carbohydrate metabolism	K00948	1.0	TRUE	1.0	TRUE	1.0	K00948	1	K00948	1079	None
M00308	M_SnakePit_MAG_00001_contigs	Semi-phosphorylative Entner-Doudoroff pathway, gluconate => glycerate-3P	Pathway modules	Carbohydrate metabolism	Central carbohydrate metabolism	K05308 K00874 K01625 (K00134 K00927,K00131,K18978)	0.25	FALSE	0.4	FALSE	NA	No enzymes unique to module	NA	K00134,K00927	1309.96	K00927 is present in multiple modules: M00001/M00002/M00003/M00308/M00552/M00165/M00166/M00611/M00612,K00134 is present in multiple modules: M00001/M00002/M00003/M00308/M00552/M00165/M00166/M00611/M00612
M00552	M_SnakePit_MAG_00001_contigs	D-galactonate degradation, De Ley-Doudoroff pathway, D-galactonate => glycerate-3P	Pathway modules	Carbohydrate metabolism	Other carbohydrate metabolism	K01684 K00883 K01631 K00134 K00927	0.4	FALSE	0.4	FALSE	NA	No enzymes unique to module	NA	K00134,K00927	1309.96	K00927 is present in multiple modules: M00001/M00002/M00003/M00308/M00552/M00165/M00166/M00611/M00612,K00134 is present in multiple modules: M00001/M00002/M00003/M00308/M00552/M00165/M00166/M00611/M00612
M00854	M_SnakePit_MAG_00001_contigs	Glycogen biosynthesis, glucose-1P => glycogen/starch	Pathway modules	Carbohydrate metabolism	Other carbohydrate metabolism	(K00963 (K00693+K00750,K16150,K16153,K13679,K20812)),(K00975 (K00703,K13679,K20812)) (K00700,K16149)	1.0	TRUE	1.0	TRUE	NA	No enzymes unique to module	NA	K00700,K00703,K00975,K00975	1037,618,505,506	K00703 is present in multiple modules: M00854/M00565,K00700 is present in multiple modules: M00854/M00565,K00975 is present in multiple modules: M00854/M00565
M00855	M_SnakePit_MAG_00001_contigs	Glycogen degradation, glycogen => glucose-6P	Pathway modules	Carbohydrate metabolism	Other carbohydrate metabolism	(K00688,K16153) (K01196,((K00705,K22451) (K02438,K01200))) (K15779,K01835,K15778)	0.6666666666666666	FALSE	0.75	TRUE	1.0	K00688,K00705	1.1	K00688,K00705,K01835	483,550,490	K01835 is present in multiple modules: M00855/M00549
M00565	M_SnakePit_MAG_00001_contigs	Trehalose biosynthesis, D-glucose 1P => trehalose	Pathway modules	Carbohydrate metabolism	Other carbohydrate metabolism	K00975 K00703 (K00700,K16149) K01214 K06044 K01236	0.5	FALSE	0.5	FALSE	NA	No enzymes unique to module	NA	K00700,K00703,K00975,K00975	1037,618,505,506	K00703 is present in multiple modules: M00854/M00565,K00700 is present in multiple modules: M00854/M00565,K00975 is present in multiple modules: M00854/M00565
M00549	M_SnakePit_MAG_00001_contigs	Nucleotide sugar biosynthesis, glucose => UDP-glucose	Pathway modules	Carbohydrate metabolism	Other carbohydrate metabolism	(K00844,K00845,K25026,K12407,K00886) (K01835,K15779,K15778) (K00963,K12447)	0.6666666666666666	FALSE	0.6666666666666666	FALSE	NA	No enzymes unique to module	NA	K01835,K25026	490.448	K25026 is present in multiple modules: M00001/M00549/M00909,K01835 is present in multiple modules: M00855/M00549
M00892	M_SnakePit_MAG_00001_contigs	UDP-N-acetyl-D-glucosamine biosynthesis, eukaryotes, glucose => UDP-GlcNAc	Pathway modules	Carbohydrate metabolism	Other carbohydrate metabolism	(K00844,K12407,K00845) K01810 K00820 K00621 K01836 K00972	0.16666666666666666	FALSE	0.16666666666666666	FALSE	NA	No enzymes unique to module	NA	K01810	538	K01810 is present in multiple modules: M00001/M00004/M00892/M00909
M00909	M_SnakePit_MAG_00001_contigs	UDP-N-acetyl-D-glucosamine biosynthesis, prokaryotes, glucose => UDP-GlcNAc	Pathway modules	Carbohydrate metabolism	Other carbohydrate metabolism	(K00845,K25026) (K01810,K13810,K15916) K00820 K03431 K04042	0.8	TRUE	0.8	TRUE	1.0	K03431,K04042	1.1	K01810,K03431,K04042,K25026	538,575,473,448	K25026 is present in multiple modules: M00001/M00549/M00909,K01810 is present in multiple modules: M00001/M00004/M00892/M00909
M00373	M_SnakePit_MAG_00001_contigs	Ethylmalonyl pathway	Pathway modules	Carbohydrate metabolism	Other carbohydrate metabolism	K00626 K00023 K17865 K14446 K14447 K14448 K14449 K08691 K14451 K01965+K01966 K05606 K01847	0.16666666666666666	FALSE	0.16666666666666666	FALSE	1.0	K17865	1	K00626,K00626,K17865	1164,468,753	K00626 is present in multiple modules: M00373/M00375/M00374/M00088/M00957/M00095/M00849
M00740	M_SnakePit_MAG_00001_contigs	Methylaspartate cycle	Pathway modules	Carbohydrate metabolism	Other carbohydrate metabolism	K01647 K01681 K00031 K00261 K19268+K01846 K04835 K19280 K14449 K19281 K19282 K00024	0.18181818181818182	FALSE	0.18181818181818182	FALSE	1.0	K01846,K04835,K19268	1,1,2001	K01846,K04835,K19268	329,326,327	None
M00165	M_SnakePit_MAG_00001_contigs	Reductive pentose phosphate cycle (Calvin cycle)	Pathway modules	Energy metabolism	Carbon fixation	K00855 (K01601-K01602) K00927 (K05298,K00150,K00134) (K01623,K01624) (K03841,K02446,K11532,K01086) K00615 (K01623,K01624) (K01100,K11532,K01086) K00615 (K01807,K01808)	0.6363636363636364	FALSE	0.6363636363636364	FALSE	NA	No enzymes unique to module	NA	K00134,K00615,K00927,K01624,K01808	1309,834,963,649,83	K00134 is present in multiple modules: M00001/M00002/M00003/M00308/M00552/M00165/M00166/M00611/M00612,K00927 is present in multiple modules: M00001/M00002/M00003/M00308/M00552/M00165/M00166/M00611/M00612,K00615 is present in multiple modules: M00004/M00007/M00165/M00167/M00611/M00612,K01624 is present in multiple modules: M00001/M00003/M00165/M00167/M00345/M00344/M00611/M00612,K01808 is present i…
M00166	M_SnakePit_MAG_00001_contigs	Reductive pentose phosphate cycle, ribulose-5P => glyceraldehyde-3P	Pathway modules	Energy metabolism	Carbon fixation	K00855 (K01601-K01602) K00927 (K05298,K00150,K00134)	0.5	FALSE	0.5	FALSE	NA	No enzymes unique to module	NA	K00134,K00927	1309.96	K00927 is present in multiple modules: M00001/M00002/M00003/M00308/M00552/M00165/M00166/M00611/M00612,K00134 is present in multiple modules: M00001/M00002/M00003/M00308/M00552/M00165/M00166/M00611/M00612
M00167	M_SnakePit_MAG_00001_contigs	Reductive pentose phosphate cycle, glyceraldehyde-3P => ribulose-5P	Pathway modules	Energy metabolism	Carbon fixation	(K01623,K01624) (K03841,K02446,K11532,K01086) K00615 (K01623,K01624) (K01100,K11532,K01086) K00615 (K01807,K01808)	0.7142857142857143	FALSE	0.7142857142857143	FALSE	NA	No enzymes unique to module	NA	K00615,K01624,K01808	834,649,83	K00615 is present in multiple modules: M00004/M00007/M00165/M00167/M00611/M00612,K01624 is present in multiple modules: M00001/M00003/M00165/M00167/M00345/M00344/M00611/M00612,K01808 is present in multiple modules: M00004/M00007/M00165/M00167/M00611/M00612
M00169	M_SnakePit_MAG_00001_contigs	CAM (Crassulacean acid metabolism), light	Pathway modules	Energy metabolism	Carbon fixation	K00029 K01006	0.5	FALSE	0.5	FALSE	NA	No enzymes unique to module	NA	K01006	256	K01006 is present in multiple modules: M00169/M00172/M00171/M00173/M00614
M00172	M_SnakePit_MAG_00001_contigs	C4-dicarboxylic acid cycle, NADP - malic enzyme type	Pathway modules	Energy metabolism	Carbon fixation	K01595 K00051 K00029 K01006	0.25	FALSE	0.25	FALSE	NA	No enzymes unique to module	NA	K01006	256	K01006 is present in multiple modules: M00169/M00172/M00171/M00173/M00614
M00171	M_SnakePit_MAG_00001_contigs	C4-dicarboxylic acid cycle, NAD - malic enzyme type	Pathway modules	Energy metabolism	Carbon fixation	K01595 K14454 K14455 (K00025,K00026) K00028 (K00814,K14272) K01006	0.14285714285714285	FALSE	0.14285714285714285	FALSE	NA	No enzymes unique to module	NA	K01006	256	K01006 is present in multiple modules: M00169/M00172/M00171/M00173/M00614
M00173	M_SnakePit_MAG_00001_contigs	Reductive citrate cycle (Arnon-Buchanan cycle)	Pathway modules	Energy metabolism	Carbon fixation	(K00169+K00170+K00171+K00172,K03737) ((K01007,K01006) K01595,K01959+K01960,K01958) K00024 (K01676,K01679,K01677+K01678) (K00239+K00240-K00241-K00242,K00244+K00245-K00246-K00247,K18556+K18557+K18558+K18559+K18560) (K01902+K01903) (K00174+K00175-K00177-K00176) K00031 (K01681,K01682) (K15230+K15231,K15232+K15233 K15234)	0.3	FALSE	0.36363636363636365	FALSE	NA	No enzymes unique to module	NA	K00174,K00175,K00176,K00177,K01006,K01677,K01678,K03737	915,916,914,917,256,925,924,850	K00176 is present in multiple modules: M00009/M00011/M00173/M00620/M00614,K03737 is present in multiple modules: M00307/M00173/M00614,K01678 is present in multiple modules: M00009/M00011/M00173/M00374/M00620/M00613/M00614,K00175 is present in multiple modules: M00009/M00011/M00173/M00620/M00614,K00174 is present in multiple modules: M00009/M00011/M00173/M00620/M00614,K01006 is present in multiple…
M00376	M_SnakePit_MAG_00001_contigs	3-Hydroxypropionate bi-cycle	Pathway modules	Energy metabolism	Carbon fixation	(K02160+K01961+K01962+K01963) K14468 K14469 K15052 K05606 (K01847,K01848+K01849) (K14471+K14472) (K00239+K00240+K00241) K01679 K08691 K14449 K14470 K09709	0.07692307692307693	FALSE	0.07692307692307693	FALSE	NA	No enzymes unique to module	NA	K01961,K01962,K01963,K02160	528,526,527,530	K01962 is present in multiple modules: M00376/M00082/M00613,K01963 is present in multiple modules: M00376/M00082/M00613,K01961 is present in multiple modules: M00376/M00082/M00613,K02160 is present in multiple modules: M00376/M00082/M00613
M00375	M_SnakePit_MAG_00001_contigs	Hydroxypropionate-hydroxybutylate cycle	Pathway modules	Energy metabolism	Carbon fixation	(K01964+K15037+K15036) K15017 K15039 K15018 K15019 K15020 K05606 (K01848+K01849) (K15038,K15017) K14465 (K14466,K18861) K14534 K15016 K00626	0.07142857142857142	FALSE	0.07142857142857142	FALSE	NA	No enzymes unique to module	NA	K00626,K00626	1164.47	K00626 is present in multiple modules: M00373/M00375/M00374/M00088/M00957/M00095/M00849
M00374	M_SnakePit_MAG_00001_contigs	Dicarboxylate-hydroxybutyrate cycle	Pathway modules	Energy metabolism	Carbon fixation	(K00169+K00170+K00171+K00172) K01007 K01595 K00024 (K01677+K01678) (K00239+K00240-K00241-K18860) (K01902+K01903) (K15038,K15017) K14465 (K14467,K18861) K14534 K15016 K00626	0.15384615384615385	FALSE	0.15384615384615385	FALSE	NA	No enzymes unique to module	NA	K00626,K00626,K01677,K01678	1164,468,925,924	K00626 is present in multiple modules: M00373/M00375/M00374/M00088/M00957/M00095/M00849,K01678 is present in multiple modules: M00009/M00011/M00173/M00374/M00620/M00613/M00614,K01677 is present in multiple modules: M00009/M00011/M00173/M00374/M00620/M00613/M00614
M00377	M_SnakePit_MAG_00001_contigs	Reductive acetyl-CoA pathway (Wood-Ljungdahl pathway)	Pathway modules	Energy metabolism	Carbon fixation	K00198 (K05299-K15022,K22015+K25123+K25124) K01938 K01491-K01500 K00297-K25007-K25008 K15023 K14138+K00197+K00194	0.2857142857142857	FALSE	0.2857142857142857	FALSE	NA	No enzymes unique to module	NA	K01491,K01500,K01938	14,906,437	K01491 is present in multiple modules: M00377/M00140/M00618,K01938 is present in multiple modules: M00377/M00140/M00618,K01500 is present in multiple modules: M00377/M00140
M00579	M_SnakePit_MAG_00001_contigs	Phosphate acetyltransferase-acetate kinase pathway, acetyl-CoA => acetate	Pathway modules	Energy metabolism	Carbon fixation	(K00625,K13788,K15024) K00925	1.0	TRUE	1.0	TRUE	NA	No enzymes unique to module	NA	K00625,K00925,K15024	961,960,1356	K00625 is present in multiple modules: M00579/M00357/M00617/M00618,K15024 is present in multiple modules: M00579/M00618,K00925 is present in multiple modules: M00579/M00357/M00617/M00618
M00620	M_SnakePit_MAG_00001_contigs	Incomplete reductive citrate cycle, acetyl-CoA => oxoglutarate	Pathway modules	Energy metabolism	Carbon fixation	(K00169+K00170+K00171+K00172) (K01959+K01960) K00024 (K01677+K01678) (K18209+K18210) (K01902+K01903) (K00174+K00175+K00176+K00177)	0.2857142857142857	FALSE	0.2857142857142857	FALSE	NA	No enzymes unique to module	NA	K00174,K00175,K00176,K00177,K01677,K01678	915,916,914,917,925,924	K00176 is present in multiple modules: M00009/M00011/M00173/M00620/M00614,K01678 is present in multiple modules: M00009/M00011/M00173/M00374/M00620/M00613/M00614,K00175 is present in multiple modules: M00009/M00011/M00173/M00620/M00614,K00174 is present in multiple modules: M00009/M00011/M00173/M00620/M00614,K00177 is present in multiple modules: M00009/M00011/M00173/M00620/M00614,K01677 is prese…
M00357	M_SnakePit_MAG_00001_contigs	Methanogenesis, acetate => methane	Pathway modules	Energy metabolism	Methane metabolism	((K00925 K00625),K01895) (K00193+K00197+K00194) (K00577+K00578+K00579+K00580+K00581-K00582-K00583+K00584) (K00399+K00401+K00402) (K22480+K22481+K22482,K03388+K03389+K03390,K08264+K08265,K03388+K03389+K03390+K14127+(K14126+K14128,K22516+K00125))	0.2	FALSE	0.3333333333333333	FALSE	NA	No enzymes unique to module	NA	K00625,K00925	961.96	K00625 is present in multiple modules: M00579/M00357/M00617/M00618,K00925 is present in multiple modules: M00579/M00357/M00617/M00618
M00346	M_SnakePit_MAG_00001_contigs	Formaldehyde assimilation, serine pathway	Pathway modules	Energy metabolism	Methane metabolism	K00600 K00830 K00018 K11529 K01689 K01595 K00024 K08692+K14067 K08691	0.1111111111111111	FALSE	0.1111111111111111	FALSE	NA	No enzymes unique to module	NA	K01689	944	K01689 is present in multiple modules: M00001/M00002/M00003/M00346
M00345	M_SnakePit_MAG_00001_contigs	Formaldehyde assimilation, ribulose monophosphate pathway	Pathway modules	Energy metabolism	Methane metabolism	(((K08093,K13812) K08094),K13831) (K00850,K16370,K21071) K01624	0.3333333333333333	FALSE	0.3333333333333333	FALSE	NA	No enzymes unique to module	NA	K01624	649	K01624 is present in multiple modules: M00001/M00003/M00165/M00167/M00345/M00344/M00611/M00612
M00344	M_SnakePit_MAG_00001_contigs	Formaldehyde assimilation, xylulose monophosphate pathway	Pathway modules	Energy metabolism	Methane metabolism	K17100 K00863 K01624 K03841	0.25	FALSE	0.25	FALSE	NA	No enzymes unique to module	NA	K01624	649	K01624 is present in multiple modules: M00001/M00003/M00165/M00167/M00345/M00344/M00611/M00612
M00176	M_SnakePit_MAG_00001_contigs	Assimilatory sulfate reduction, sulfate => H2S	Pathway modules	Energy metabolism	Sulfur metabolism	(((K13811,K00958+K00860,K00955+K00957,K00956+K00957+K00860) K00390),(K13811 K05907)) (K00380+K00381,K00392)	0.0	FALSE	0.3333333333333333	FALSE	NA	No enzymes unique to module	NA	K00390	1183	K00390 is present in multiple modules: M00176/M00616
M00144	M_SnakePit_MAG_00001_contigs	NADH:quinone oxidoreductase, prokaryotes	Pathway modules	Energy metabolism	ATP synthesis	K00330+(K00331+K00332+K00333,K00331+K13378,K13380)+K00334+K00335+K00336+K00337+K00338+K00339+K00340+(K00341+K00342)+K00343	0.0	FALSE	0.08333333333333333	FALSE	1.0	K00335	1	K00335	701	None
M00153	M_SnakePit_MAG_00001_contigs	Cytochrome bd ubiquinol oxidase	Pathway modules	Energy metabolism	ATP synthesis	K00425+K00426+(K00424,K22501)	0.0	FALSE	0.6666666666666666	FALSE	1.0	K00425,K00426	1.1	K00425,K00426	840.841	None
M00157	M_SnakePit_MAG_00001_contigs	F-type ATPase, prokaryotes and chloroplasts	Pathway modules	Energy metabolism	ATP synthesis	K02111+K02112+K02113+K02114+K02115+K02108+K02109+K02110	1.0	TRUE	1.0	TRUE	1.0	K02108,K02109,K02110,K02111,K02112,K02113,K02114,K02115	1,1,1,1,1,1,1,1	K02108,K02109,K02110,K02111,K02112,K02113,K02114,K02115	88,90,89,92,94,91,95,93	None
M00082	M_SnakePit_MAG_00001_contigs	Fatty acid biosynthesis, initiation	Pathway modules	Lipid metabolism	Fatty acid metabolism	(K11262,(K02160+K01961,K11263)+(K01962+K01963,K18472)) (K00665,K00667+K00668,K11533,(K00645 (K00648,K18473)))	1.0	TRUE	1.0	TRUE	1.0	K00648	1	K00645,K00648,K01961,K01962,K01963,K02160	533,535,528,526,527,530	K00645 is present in multiple modules: M00082/M00873/M00874,K02160 is present in multiple modules: M00376/M00082/M00613,K01962 is present in multiple modules: M00376/M00082/M00613,K01963 is present in multiple modules: M00376/M00082/M00613,K01961 is present in multiple modules: M00376/M00082/M00613
M00083	M_SnakePit_MAG_00001_contigs	Fatty acid biosynthesis, elongation	Pathway modules	Lipid metabolism	Fatty acid metabolism	K00665,(K00667 K00668),K11533,((K00647,K09458) K00059 (K02372,K01716,K16363) (K00208,K02371,K10780,K00209))	1.0	TRUE	1.0	TRUE	1.0	K02371	1	K00059,K00059,K00059,K02371,K02372,K09458	1163,532,638,534,529,531	K00059 is present in multiple modules: M00083/M00874/M00572,K02372 is present in multiple modules: M00083/M00572,K09458 is present in multiple modules: M00083/M00873/M00874/M00572
M00873	M_SnakePit_MAG_00001_contigs	Fatty acid biosynthesis in mitochondria, animals	Pathway modules	Lipid metabolism	Fatty acid metabolism	K18660 K03955+K00645 K09458 K11539+K13370 K22540 K07512	0.16666666666666666	FALSE	0.25	FALSE	NA	No enzymes unique to module	NA	K00645,K09458	533.531	K00645 is present in multiple modules: M00082/M00873/M00874,K09458 is present in multiple modules: M00083/M00873/M00874/M00572
M00874	M_SnakePit_MAG_00001_contigs	Fatty acid biosynthesis in mitochondria, fungi	Pathway modules	Lipid metabolism	Fatty acid metabolism	K11262 K03955+K00645 K09458 K00059 K22541 K07512	0.3333333333333333	FALSE	0.4166666666666667	FALSE	NA	No enzymes unique to module	NA	K00059,K00059,K00059,K00645,K09458	1163,532,638,533,531	K00059 is present in multiple modules: M00083/M00874/M00572,K00645 is present in multiple modules: M00082/M00873/M00874,K09458 is present in multiple modules: M00083/M00873/M00874/M00572
M00087	M_SnakePit_MAG_00001_contigs	beta-Oxidation	Pathway modules	Lipid metabolism	Fatty acid metabolism	(K00232,K00249,K00255,K06445,K09479) (((K01692,K07511,K13767) (K00022,K07516)),K01825,K01782,K07514,K07515,K10527) (K00632,K07508,K07509,K07513)	0.0	FALSE	0.25	FALSE	1.0	K07516	1	K07516	467	None
M00088	M_SnakePit_MAG_00001_contigs	Ketone body biosynthesis, acetyl-CoA => acetoacetate/3-hydroxybutyrate/acetone	Pathway modules	Lipid metabolism	Lipid metabolism	K00626 K01641 K01640 K00019 K01574	0.2	FALSE	0.2	FALSE	NA	No enzymes unique to module	NA	K00626,K00626	1164.47	K00626 is present in multiple modules: M00373/M00375/M00374/M00088/M00957/M00095/M00849
M00089	M_SnakePit_MAG_00001_contigs	Triacylglycerol biosynthesis	Pathway modules	Lipid metabolism	Lipid metabolism	(K00629,K13506,K13507,K00630,K13508) (K00655,K13509,K13523,K19007,K13513,K13517,K13519,K14674,K22831) (K01080,K15728,K18693) (K11155,K11160,K14456,K22848,K22849)	0.25	FALSE	0.25	FALSE	1.0	K00655	1	K00655	942	None
M00093	M_SnakePit_MAG_00001_contigs	Phosphatidylethanolamine (PE) biosynthesis, PA => PS => PE	Pathway modules	Lipid metabolism	Lipid metabolism	K00981 (K00998,K17103) K01613	0.3333333333333333	FALSE	0.3333333333333333	FALSE	1.0	K00981	1	K00981	830	None
M00048	M_SnakePit_MAG_00001_contigs	De novo purine biosynthesis, PRPP + glutamine => IMP	Pathway modules	Nucleotide metabolism	Purine metabolism	K00764 (K01945,K11787,K11788,K13713) (K00601,K11175,K08289,K11787,K01492) (K01952,(K23269+K23264+K23265),(K23270+K23265)) (K01933,K11787,K11788 (K01587,K11808,K01589 K01588)) (K01923,K01587,K13713) K01756 (K00602,(K01492,K06863 K11176))	0.875	TRUE	0.875	TRUE	1.0	K00602,K00764,K01933,K01945,K01952,K11175	1,1,1,1,1,1	K00602,K00764,K01756,K01933,K01945,K01952,K11175	810,807,230,808,811,806,809	K01756 is present in multiple modules: M00048/M00049
M00049	M_SnakePit_MAG_00001_contigs	Adenine ribonucleotide biosynthesis, IMP => ADP,ATP	Pathway modules	Nucleotide metabolism	Purine metabolism	K01939 K01756 (K00939,K18532,K18533,K00944) K00940	0.75	TRUE	0.75	TRUE	1.0	K00939,K01939	1.1	K00939,K01756,K01939	365,230,231	K01756 is present in multiple modules: M00048/M00049
M00050	M_SnakePit_MAG_00001_contigs	Guanine ribonucleotide biosynthesis, IMP => GDP,GTP	Pathway modules	Nucleotide metabolism	Purine metabolism	K00088 K01951 K00942 (K00940,K18533)	0.75	TRUE	0.75	TRUE	1.0	K00088,K00942,K01951	2,1,2001	K00088,K00088,K00942,K01951	863,1006,774,862	None
M00958	M_SnakePit_MAG_00001_contigs	Adenine ribonucleotide degradation, AMP => Urate	Pathway modules	Nucleotide metabolism	Purine metabolism	((K01490 (K01081,K19970,K03787,K18550)),((K01081,K19970,K11751,K03787,K02566,K08693) (K01488,K19572,K05810))) (K03783,K03784,K09913,K05810) (K00106,K00087+K13479+K13480,K13481+K13482,K11177+K11178+K13483)	0.3333333333333333	FALSE	0.5	FALSE	NA	No enzymes unique to module	NA	K01081,K03784	381.793	K01081 is present in multiple modules: M00958/M00959,K03784 is present in multiple modules: M00958/M00959
M00959	M_SnakePit_MAG_00001_contigs	Guanine ribonucleotide degradation, GMP => Urate	Pathway modules	Nucleotide metabolism	Purine metabolism	(K01081,K19970,K11751,K03787,K02566,K08693,K20881) (K03783,K03784,K09913,K05810) K01487 (K00106,K00087+K13479+K13480,K13481+K13482,K11177+K11178+K13483)	0.5	FALSE	0.5	FALSE	NA	No enzymes unique to module	NA	K01081,K03784	381.793	K01081 is present in multiple modules: M00958/M00959,K03784 is present in multiple modules: M00958/M00959
M00051	M_SnakePit_MAG_00001_contigs	De novo pyrimidine biosynthesis, glutamine (+ PRPP) => UMP	Pathway modules	Nucleotide metabolism	Pyrimidine metabolism	(K11540,(K11541 K01465),((K01954,K01955+K01956) (K00609+K00610,K00608) K01465)) (K00226,K00254,K17828) (K13421,K00762 K01591)	0.6666666666666666	FALSE	0.9166666666666666	TRUE	1.0	K00609,K00762,K01465,K01591,K01955,K01956,K17828	2,1,1,1,1,1,1	K00609,K00609,K00762,K01465,K01591,K01955,K01956,K17828	636,870,626,869,628,635,634,629	None
M00052	M_SnakePit_MAG_00001_contigs	Pyrimidine ribonucleotide biosynthesis, UMP => UDP/UTP,CDP/CTP	Pathway modules	Nucleotide metabolism	Pyrimidine metabolism	(K13800,K13809,K09903) (K00940,K18533) K01937	0.6666666666666666	FALSE	0.6666666666666666	FALSE	1.0	K01937,K09903	1.1	K01937,K09903	478.98	None
M00938	M_SnakePit_MAG_00001_contigs	Pyrimidine deoxyribonucleotide biosynthesis, UDP => dTTP	Pathway modules	Nucleotide metabolism	Pyrimidine metabolism	(K00525+K00526,K10807+K10808) (K00940,K18533) K01520 (K00560,K13998,K03465) K00943	0.6	FALSE	0.6	FALSE	1.0	K00560,K00943,K01520	1,1,2001	K00560,K00943,K01520	118,549,276	None
M00018	M_SnakePit_MAG_00001_contigs	Threonine biosynthesis, aspartate => homoserine => threonine	Pathway modules	Amino acid metabolism	Serine and threonine metabolism	(K00928,K12524,K12525,K12526) K00133 (K00003,K12524,K12525) (K00872,K02204,K02203) K01733	0.4	FALSE	0.4	FALSE	NA	No enzymes unique to module	NA	K00133,K00928	1383.11	K00133 is present in multiple modules: M00018/M00033/M00017/M00016/M00525/M00526/M00527,K00928 is present in multiple modules: M00018/M00033/M00017/M00016/M00525/M00526/M00527
M00033	M_SnakePit_MAG_00001_contigs	Ectoine biosynthesis, aspartate => ectoine	Pathway modules	Amino acid metabolism	Serine and threonine metabolism	K00928 K00133 K00836 K06718 K06720	0.4	FALSE	0.4	FALSE	NA	No enzymes unique to module	NA	K00133,K00928	1383.11	K00133 is present in multiple modules: M00018/M00033/M00017/M00016/M00525/M00526/M00527,K00928 is present in multiple modules: M00018/M00033/M00017/M00016/M00525/M00526/M00527
M00609	M_SnakePit_MAG_00001_contigs	Cysteine biosynthesis, methionine => cysteine	Pathway modules	Amino acid metabolism	Cysteine and methionine metabolism	K00789 K17462 K01243 K07173 K17216 K17217	0.3333333333333333	FALSE	0.3333333333333333	FALSE	NA	No enzymes unique to module	NA	K00789,K01243	1047.57	K00789 is present in multiple modules: M00609/M00034/M00035/M00368/M00953,K01243 is present in multiple modules: M00609/M00034
M00017	M_SnakePit_MAG_00001_contigs	Methionine biosynthesis, aspartate => homoserine => methionine	Pathway modules	Amino acid metabolism	Cysteine and methionine metabolism	(K00928,K12524,K12525) K00133 (K00003,K12524,K12525) (K00651,K00641) K01739 (K01760,K14155) (K00548,K24042,K00549)	0.2857142857142857	FALSE	0.2857142857142857	FALSE	NA	No enzymes unique to module	NA	K00133,K00928	1383.11	K00133 is present in multiple modules: M00018/M00033/M00017/M00016/M00525/M00526/M00527,K00928 is present in multiple modules: M00018/M00033/M00017/M00016/M00525/M00526/M00527
M00034	M_SnakePit_MAG_00001_contigs	Methionine salvage pathway	Pathway modules	Amino acid metabolism	Cysteine and methionine metabolism	K00789 K01611 K00797 ((K01243,K01244) K00899,(K00772,K05810)) K08963 (K16054,K08964 (K09880,K08965 K08966)) K08967 (K00815,K08969,K23977,K00832,K00838)	0.25	FALSE	0.3333333333333333	FALSE	NA	No enzymes unique to module	NA	K00789,K00797,K01243	1047,826,573	K00789 is present in multiple modules: M00609/M00034/M00035/M00368/M00953,K01243 is present in multiple modules: M00609/M00034,K00797 is present in multiple modules: M00034/M00133
M00035	M_SnakePit_MAG_00001_contigs	Methionine degradation	Pathway modules	Amino acid metabolism	Cysteine and methionine metabolism	K00789 (K00552,K00558,K17398,K17399) K01251 (K01697,K10150)	0.5	FALSE	0.5	FALSE	1.0	K00558	3	K00558,K00558,K00558,K00789	641,883,367,1047	K00789 is present in multiple modules: M00609/M00034/M00035/M00368/M00953
M00368	M_SnakePit_MAG_00001_contigs	Ethylene biosynthesis, methionine => ethylene	Pathway modules	Amino acid metabolism	Cysteine and methionine metabolism	K00789 (K01762,K20772) K05933	0.3333333333333333	FALSE	0.3333333333333333	FALSE	NA	No enzymes unique to module	NA	K00789	1047	K00789 is present in multiple modules: M00609/M00034/M00035/M00368/M00953
M00016	M_SnakePit_MAG_00001_contigs	Lysine biosynthesis, succinyl-DAP pathway, aspartate => lysine	Pathway modules	Amino acid metabolism	Lysine metabolism	(K00928,K12524,K12525,K12526) K00133 K01714 K00215 K00674 (K00821,K14267) K01439 K01778 (K01586,K12526)	0.6666666666666666	FALSE	0.6666666666666666	FALSE	1.0	K01439	1	K00133,K00928,K01439,K01586,K01714,K01778	1383,1073,431,2,1384,3	K00133 is present in multiple modules: M00018/M00033/M00017/M00016/M00525/M00526/M00527,K00928 is present in multiple modules: M00018/M00033/M00017/M00016/M00525/M00526/M00527,K01586 is present in multiple modules: M00016/M00525/M00526/M00527,K01714 is present in multiple modules: M00016/M00525/M00526/M00527,K01778 is present in multiple modules: M00016/M00525/M00527
M00525	M_SnakePit_MAG_00001_contigs	Lysine biosynthesis, acetyl-DAP pathway, aspartate => lysine	Pathway modules	Amino acid metabolism	Lysine metabolism	K00928 K00133 K01714 K00215 K05822 K00841 K05823 K01778 K01586	0.6666666666666666	FALSE	0.6666666666666666	FALSE	1.0	K05823	1	K00133,K00928,K01586,K01714,K01778,K05823	1383,1073,2,1384,3,417	K00133 is present in multiple modules: M00018/M00033/M00017/M00016/M00525/M00526/M00527,K00928 is present in multiple modules: M00018/M00033/M00017/M00016/M00525/M00526/M00527,K01586 is present in multiple modules: M00016/M00525/M00526/M00527,K01714 is present in multiple modules: M00016/M00525/M00526/M00527,K01778 is present in multiple modules: M00016/M00525/M00527
M00526	M_SnakePit_MAG_00001_contigs	Lysine biosynthesis, DAP dehydrogenase pathway, aspartate => lysine	Pathway modules	Amino acid metabolism	Lysine metabolism	(K00928,K12524,K12525,K12526) K00133 K01714 K00215 K03340 (K01586,K12526)	0.6666666666666666	FALSE	0.6666666666666666	FALSE	NA	No enzymes unique to module	NA	K00133,K00928,K01586,K01714	1383,1073,2,1384	K00133 is present in multiple modules: M00018/M00033/M00017/M00016/M00525/M00526/M00527,K01586 is present in multiple modules: M00016/M00525/M00526/M00527,K00928 is present in multiple modules: M00018/M00033/M00017/M00016/M00525/M00526/M00527,K01714 is present in multiple modules: M00016/M00525/M00526/M00527
M00527	M_SnakePit_MAG_00001_contigs	Lysine biosynthesis, DAP aminotransferase pathway, aspartate => lysine	Pathway modules	Amino acid metabolism	Lysine metabolism	(K00928,K12524,K12525,K12526) K00133 K01714 K00215 K10206 K01778 (K01586,K12526)	0.7142857142857143	FALSE	0.7142857142857143	FALSE	NA	No enzymes unique to module	NA	K00133,K00928,K01586,K01714,K01778	1383,1073,2,1384,3	K00133 is present in multiple modules: M00018/M00033/M00017/M00016/M00525/M00526/M00527,K00928 is present in multiple modules: M00018/M00033/M00017/M00016/M00525/M00526/M00527,K01586 is present in multiple modules: M00016/M00525/M00526/M00527,K01714 is present in multiple modules: M00016/M00525/M00526/M00527,K01778 is present in multiple modules: M00016/M00525/M00527
M00957	M_SnakePit_MAG_00001_contigs	Lysine degradation, bacteria, L-lysine => glutarate => succinate/acetyl-CoA	Pathway modules	Amino acid metabolism	Lysine metabolism	K00468 K01506 (K14268,K07250) K00135 ((K15737 K15736),(K01041 K00252 (K01692,K01825,K01782) (K01825,K01782) K00626))	0.0	FALSE	0.1111111111111111	FALSE	NA	No enzymes unique to module	NA	K00626,K00626	1164.47	K00626 is present in multiple modules: M00373/M00375/M00374/M00088/M00957/M00095/M00849
M00133	M_SnakePit_MAG_00001_contigs	Polyamine biosynthesis, arginine => agmatine => putrescine => spermidine	Pathway modules	Amino acid metabolism	Polyamine biosynthesis	(K01583,K01584,K01585,K02626) K01480 K01611 K00797	0.75	TRUE	0.75	TRUE	1.0	K01480,K01585	1.2	K00797,K01480,K01585,K01585	826,827,825,897	K00797 is present in multiple modules: M00034/M00133
M00026	M_SnakePit_MAG_00001_contigs	Histidine biosynthesis, PRPP => histidine	Pathway modules	Amino acid metabolism	Histidine metabolism	(K00765-K02502) (K01523 K01496,K11755,K14152) (K01814,K24017) (K02501+K02500,K01663) ((K01693 K00817 (K04486,K05602,K18649)),(K01089 K00817)) (K00013,K14152)	0.0	FALSE	0.125	FALSE	1.0	K04486	1	K04486	964	None
M00045	M_SnakePit_MAG_00001_contigs	Histidine degradation, histidine => N-formiminoglutamate => glutamate	Pathway modules	Amino acid metabolism	Histidine metabolism	K01745 K01712 K01468 (K01479,K00603,K13990,(K05603 K01458))	1.0	TRUE	1.0	TRUE	1.0	K00603,K01468,K01712,K01745	1,1,1,1	K00603,K01468,K01712,K01745	908,907,909,905	None
M00022	M_SnakePit_MAG_00001_contigs	Shikimate pathway, phosphoenolpyruvate + erythrose-4P => chorismate	Pathway modules	Amino acid metabolism	Aromatic amino acid metabolism	(K01626,K03856,K13853) (((K01735,K13829) ((K03785,K03786) K00014,K13832)),K13830) ((K00891,K13829) (K00800,K24018),K13830) K01736	0.5	FALSE	0.7142857142857143	FALSE	1.0	K00800,K00891,K01735,K01736,K03786	1,1,1,1,1	K00800,K00891,K01735,K01736,K03786	741,736,738,739,737	None
M00118	M_SnakePit_MAG_00001_contigs	Glutathione biosynthesis, glutamate => glutathione	Pathway modules	Amino acid metabolism	Other amino acid metabolism	(K11204+K11205,K01919) (K21456,K01920)	0.5	FALSE	0.5	FALSE	1.0	K01919	1	K01919	796	None
M00923	M_SnakePit_MAG_00001_contigs	UDP-L-FucNAm biosynthesis	Pathway modules	Glycan metabolism	Lipopolysaccharide metabolism	K15894 K19068 K24258 K24259	0.25	FALSE	0.25	FALSE	1.0	K15894	1	K15894	599	None
M00127	M_SnakePit_MAG_00001_contigs	Thiamine biosynthesis, prokaryotes, AIR (+ DXP/tyrosine) => TMP/TPP	Pathway modules	Metabolism of cofactors and vitamins	Cofactor and vitamin metabolism	K03148+K03154 K03151 K03150 K03149 K03147 ((K00941 K00788),K14153,K21219) K00946	0.2857142857142857	FALSE	0.2857142857142857	FALSE	1.0	K03150	1	K03150,K03151	708.113	K03151 is present in multiple modules: M00127/M00895
M00895	M_SnakePit_MAG_00001_contigs	Thiamine biosynthesis, prokaryotes, AIR (+ DXP/glycine) => TMP/TPP	Pathway modules	Metabolism of cofactors and vitamins	Cofactor and vitamin metabolism	K03148+K03154 K03151 K03153 K03149 K10810 K03147 K00941 K00788 K00946	0.1111111111111111	FALSE	0.1111111111111111	FALSE	NA	No enzymes unique to module	NA	K03151	1126	K03151 is present in multiple modules: M00127/M00895
M00897	M_SnakePit_MAG_00001_contigs	Thiamine biosynthesis, plants, AIR (+ NAD+) => TMP/thiamine/TPP	Pathway modules	Metabolism of cofactors and vitamins	Cofactor and vitamin metabolism	K03146 K03147 K14153 K22911 K00949	0.2	FALSE	0.2	FALSE	NA	No enzymes unique to module	NA	K00949	1159	K00949 is present in multiple modules: M00897/M00898
M00898	M_SnakePit_MAG_00001_contigs	Thiamine biosynthesis, pyridoxal-5P => TMP/thiamine/TPP	Pathway modules	Metabolism of cofactors and vitamins	Cofactor and vitamin metabolism	K03146 K18278 K00877 K14154 -- K00949	0.16666666666666666	FALSE	0.16666666666666666	FALSE	NA	No enzymes unique to module	NA	K00949	1159	K00949 is present in multiple modules: M00897/M00898,'--' steps are assumed incomplete
M00125	M_SnakePit_MAG_00001_contigs	Riboflavin biosynthesis, plants and bacteria, GTP => riboflavin/FMN/FAD	Pathway modules	Metabolism of cofactors and vitamins	Cofactor and vitamin metabolism	(K01497,K14652) (K01498 K00082,K11752) (K22912,K20860,K20861,K20862,K21063,K21064) (K02858,K14652) K00794 K00793 (K20884 K22949,K11753)	0.2857142857142857	FALSE	0.2857142857142857	FALSE	1.0	K11753,K21064	1.2	K11753,K21064,K21064	403,1432,313	None
M00115	M_SnakePit_MAG_00001_contigs	NAD biosynthesis, aspartate => quinolinate => NAD	Pathway modules	Metabolism of cofactors and vitamins	Cofactor and vitamin metabolism	(K00278,K06989) K03517 K00767 (K00969,K06210) (K01916,K01950)	0.4	FALSE	0.4	FALSE	NA	No enzymes unique to module	NA	K00969,K01916	622.643	K00969 is present in multiple modules: M00115/M00912,K01916 is present in multiple modules: M00115/M00912
M00912	M_SnakePit_MAG_00001_contigs	NAD biosynthesis, tryptophan => quinolinate => NAD	Pathway modules	Metabolism of cofactors and vitamins	Cofactor and vitamin metabolism	(K00453,K00463) (K01432,K14263,K07130) K00486 K01556 K00452 K00767 (K00969,K06210) (K01916,K01950)	0.25	FALSE	0.25	FALSE	NA	No enzymes unique to module	NA	K00969,K01916	622.643	K00969 is present in multiple modules: M00115/M00912,K01916 is present in multiple modules: M00115/M00912
M00120	M_SnakePit_MAG_00001_contigs	Coenzyme A biosynthesis, pantothenate => CoA	Pathway modules	Metabolism of cofactors and vitamins	Cofactor and vitamin metabolism	(K00867,K03525,K01947,K09680) ((K01922,K21977) K01598,K13038) (K02318,(K00954,K02201) K00859)	0.6666666666666666	FALSE	0.75	TRUE	1.0	K00859,K00954,K03525	1,1,2001	K00859,K00954,K03525	769,935,1447	None
M00572	M_SnakePit_MAG_00001_contigs	Pimeloyl-ACP biosynthesis, BioC-BioH pathway, malonyl-ACP => pimeloyl-ACP	Pathway modules	Metabolism of cofactors and vitamins	Cofactor and vitamin metabolism	K02169 (K00647,K09458) K00059 K02372 K00208 (K02170,K09789,K19560,K19561)	0.5	FALSE	0.5	FALSE	NA	No enzymes unique to module	NA	K00059,K00059,K00059,K02372,K09458	1163,532,638,529,531	K00059 is present in multiple modules: M00083/M00874/M00572,K02372 is present in multiple modules: M00083/M00572,K09458 is present in multiple modules: M00083/M00873/M00874/M00572
M00123	M_SnakePit_MAG_00001_contigs	Biotin biosynthesis, pimeloyl-ACP/CoA => biotin	Pathway modules	Metabolism of cofactors and vitamins	Cofactor and vitamin metabolism	K00652 ((K00833,K19563) K01935,K19562) K01012	0.3333333333333333	FALSE	0.3333333333333333	FALSE	NA	No enzymes unique to module	NA	K01012	703	K01012 is present in multiple modules: M00123/M00950/M00573/M00577
M00950	M_SnakePit_MAG_00001_contigs	Biotin biosynthesis, BioU pathway, pimeloyl-ACP/CoA => biotin	Pathway modules	Metabolism of cofactors and vitamins	Cofactor and vitamin metabolism	K00652 K25570 K01935 K01012	0.25	FALSE	0.25	FALSE	NA	No enzymes unique to module	NA	K01012	703	K01012 is present in multiple modules: M00123/M00950/M00573/M00577
M00573	M_SnakePit_MAG_00001_contigs	Biotin biosynthesis, BioI pathway, long-chain-acyl-ACP => pimeloyl-ACP => biotin	Pathway modules	Metabolism of cofactors and vitamins	Cofactor and vitamin metabolism	K16593 K00652 K19563 K01935 K01012	0.2	FALSE	0.2	FALSE	NA	No enzymes unique to module	NA	K01012	703	K01012 is present in multiple modules: M00123/M00950/M00573/M00577
M00577	M_SnakePit_MAG_00001_contigs	Biotin biosynthesis, BioW pathway, pimelate => pimeloyl-CoA => biotin	Pathway modules	Metabolism of cofactors and vitamins	Cofactor and vitamin metabolism	K01906 K00652 (K00833,K19563) K01935 K01012	0.2	FALSE	0.2	FALSE	NA	No enzymes unique to module	NA	K01012	703	K01012 is present in multiple modules: M00123/M00950/M00573/M00577
M00126	M_SnakePit_MAG_00001_contigs	Tetrahydrofolate biosynthesis, GTP => THF	Pathway modules	Metabolism of cofactors and vitamins	Cofactor and vitamin metabolism	(K01495,K09007,K22391) (K01077,K01113,(K08310,K19965)) ((K13939,(K13940,K01633 K00950) K00796),(K01633 K13941)) (K11754,K20457) (K00287,K13998)	0.4	FALSE	0.4	FALSE	1.0	K22391	1	K00287,K22391	335.106	K00287 is present in multiple modules: M00126/M00840
M00840	M_SnakePit_MAG_00001_contigs	Tetrahydrofolate biosynthesis, mediated by ribA and trpF, GTP => THF	Pathway modules	Metabolism of cofactors and vitamins	Cofactor and vitamin metabolism	K14652 K22100 -- K01633 K13941 K22099 K00287	0.14285714285714285	FALSE	0.14285714285714285	FALSE	NA	No enzymes unique to module	NA	K00287	335	K00287 is present in multiple modules: M00126/M00840,'--' steps are assumed incomplete
M00140	M_SnakePit_MAG_00001_contigs	C1-unit interconversion, prokaryotes	Pathway modules	Metabolism of cofactors and vitamins	Cofactor and vitamin metabolism	K00600 (K01491,(K00300 K01500)) K01938	0.6666666666666666	FALSE	0.6666666666666666	FALSE	NA	No enzymes unique to module	NA	K01491,K01500,K01938	14,906,437	K01491 is present in multiple modules: M00377/M00140/M00618,K01938 is present in multiple modules: M00377/M00140/M00618,K01500 is present in multiple modules: M00377/M00140
M00121	M_SnakePit_MAG_00001_contigs	Heme biosynthesis, plants and bacteria, glutamate => heme	Pathway modules	Metabolism of cofactors and vitamins	Cofactor and vitamin metabolism	K01885 K02492 K01845 K01698 K01749 (K01719,K13542,K13543) K01599 (K00228,K02495) (K00230,K00231,K08973) K01772	0.2	FALSE	0.2	FALSE	1.0	K01885,K02495	1.2	K01885,K02495,K02495	382,1225,236	None
M00122	M_SnakePit_MAG_00001_contigs	Cobalamin biosynthesis, cobyrinate a,c-diamide => cobalamin	Pathway modules	Metabolism of cofactors and vitamins	Cofactor and vitamin metabolism	(K00798,K19221) K02232 (K02225,K02227) K02231 K00768 (K02226,K22316) K02233	0.14285714285714285	FALSE	0.14285714285714285	FALSE	1.0	K02232	1	K02232	752	None
M00117	M_SnakePit_MAG_00001_contigs	Ubiquinone biosynthesis, prokaryotes, chorismate (+ polyprenyl-PP) => ubiquinol	Pathway modules	Metabolism of cofactors and vitamins	Cofactor and vitamin metabolism	(K03181,K18240) K03179 (K03182+K03186) K18800 K00568 K03185 K03183 (K03184,K06134) K00568	0.2222222222222222	FALSE	0.2222222222222222	FALSE	1.0	K03179,K03182	1.1	K03179,K03182,K03186	458,457,459	K03186 is present in multiple modules: M00117/M00849
M00095	M_SnakePit_MAG_00001_contigs	C5 isoprenoid biosynthesis, mevalonate pathway	Pathway modules	Biosynthesis of terpenoids and polyketides	Terpenoid backbone biosynthesis	K00626 K01641 K00021 K00869 (K00938,K13273) K01597 K01823	0.14285714285714285	FALSE	0.14285714285714285	FALSE	NA	No enzymes unique to module	NA	K00626,K00626	1164.47	K00626 is present in multiple modules: M00373/M00375/M00374/M00088/M00957/M00095/M00849
M00849	M_SnakePit_MAG_00001_contigs	C5 isoprenoid biosynthesis, mevalonate pathway, archaea	Pathway modules	Biosynthesis of terpenoids and polyketides	Terpenoid backbone biosynthesis	K00626 K01641 (K00021,K00054) ((K00869 (K17942,(K25517+K09128 K25518+K03186))),(K18689 K18690 K22813)) K06981 K01823	0.16666666666666666	FALSE	0.1875	FALSE	NA	No enzymes unique to module	NA	K00626,K00626,K03186	1164,468,459	K00626 is present in multiple modules: M00373/M00375/M00374/M00088/M00957/M00095/M00849,K03186 is present in multiple modules: M00117/M00849
M00096	M_SnakePit_MAG_00001_contigs	C5 isoprenoid biosynthesis, non-mevalonate pathway	Pathway modules	Biosynthesis of terpenoids and polyketides	Terpenoid backbone biosynthesis	K01662 K00099 (K00991,K12506) K00919 (K01770,K12506) K03526 K03527 K01823	0.75	TRUE	0.75	TRUE	1.0	K00099,K00919,K01662,K01770,K03526,K03527	1,1,1,1,1,1	K00099,K00919,K01662,K01770,K03526,K03527	831,34,1204,108,848,272	None
M00039	M_SnakePit_MAG_00001_contigs	Monolignol biosynthesis, phenylalanine/tyrosine => monolignol	Pathway modules	Biosynthesis of other secondary metabolites	Biosynthesis of phytochemical compounds	(K10775,K13064) K00487 K01904 K13065 K09754 K00588 K09753 K09755 K13066 (K00083,K22395)	0.1	FALSE	0.1	FALSE	1.0	K00588	1	K00588	128	None
M00953	M_SnakePit_MAG_00001_contigs	Mugineic acid biosynthesis, methionine => 3-epihydroxymugineic acid	Pathway modules	Biosynthesis of other secondary metabolites	Biosynthesis of phytochemical compounds	K00789 K05953 K14271 K22374 K18054	0.2	FALSE	0.2	FALSE	NA	No enzymes unique to module	NA	K00789	1047	K00789 is present in multiple modules: M00609/M00034/M00035/M00368/M00953
M00848	M_SnakePit_MAG_00001_contigs	Aurachin biosynthesis, anthranilate => aurachin A	Pathway modules	Biosynthesis of other secondary metabolites	Biosynthesis of other antibiotics	K09460 K02078+K14245+K14246+K22798 K22799 K22800 K21272 K21271 K22801 K22802	0.0	FALSE	0.03125	FALSE	1.0	K02078	2	K02078,K02078	525.129	No KOfam profile for K21272,No KOfam profile for K22799,No KOfam profile for K14245,No KOfam profile for K22802,No KOfam profile for K22798,No KOfam profile for K14246,No KOfam profile for K22800,No KOfam profile for K22801,No KOfam profile for K09460,No KOfam profile for K21271
M00876	M_SnakePit_MAG_00001_contigs	Staphyloferrin A biosynthesis, L-ornithine => staphyloferrin A	Pathway modules	Biosynthesis of other secondary metabolites	Biosynthesis of other bacterial compounds	K21898 K23446 K23447	0.3333333333333333	FALSE	0.3333333333333333	FALSE	1.0	K21898	1	K21898	1368	None
M00651	M_SnakePit_MAG_00001_contigs	Vancomycin resistance, D-Ala-D-Lac type	Signature modules	Gene set	Drug resistance	(K18345 K18344 K07260 K18346),(K18351 K18352 K18354 K18353) (K18347 K15739 K08641)	0.0	FALSE	0.14285714285714285	FALSE	1.0	K18346	1	K18346	625	None
M00611	M_SnakePit_MAG_00001_contigs	Oxygenic photosynthesis in plants and cyanobacteria	Signature modules	Module set	Metabolic capacity	(M00161,M00163) M00165	0.0	FALSE	0.3181818181818182	FALSE	NA	No enzymes unique to module	NA	K00134,K00615,K00927,K01624,K01808	1309,834,963,649,83	K00134 is present in multiple modules: M00001/M00002/M00003/M00308/M00552/M00165/M00166/M00611/M00612,K00927 is present in multiple modules: M00001/M00002/M00003/M00308/M00552/M00165/M00166/M00611/M00612,K00615 is present in multiple modules: M00004/M00007/M00165/M00167/M00611/M00612,K01624 is present in multiple modules: M00001/M00003/M00165/M00167/M00345/M00344/M00611/M00612,K01808 is present i…
M00612	M_SnakePit_MAG_00001_contigs	Anoxygenic photosynthesis in purple bacteria	Signature modules	Module set	Metabolic capacity	M00597 M00165	0.0	FALSE	0.3181818181818182	FALSE	NA	No enzymes unique to module	NA	K00134,K00615,K00927,K01624,K01808	1309,834,963,649,83	K00134 is present in multiple modules: M00001/M00002/M00003/M00308/M00552/M00165/M00166/M00611/M00612,K00927 is present in multiple modules: M00001/M00002/M00003/M00308/M00552/M00165/M00166/M00611/M00612,K00615 is present in multiple modules: M00004/M00007/M00165/M00167/M00611/M00612,K01624 is present in multiple modules: M00001/M00003/M00165/M00167/M00345/M00344/M00611/M00612,K01808 is present i…
M00613	M_SnakePit_MAG_00001_contigs	Anoxygenic photosynthesis in green nonsulfur bacteria	Signature modules	Module set	Metabolic capacity	M00597 M00376	0.0	FALSE	0.038461538461538464	FALSE	NA	No enzymes unique to module	NA	K01677,K01678,K01961,K01962,K01963,K02160	925,924,528,526,527,530	K01678 is present in multiple modules: M00009/M00011/M00173/M00374/M00620/M00613/M00614,K02160 is present in multiple modules: M00376/M00082/M00613,K01962 is present in multiple modules: M00376/M00082/M00613,K01963 is present in multiple modules: M00376/M00082/M00613,K01961 is present in multiple modules: M00376/M00082/M00613,K01677 is present in multiple modules: M00009/M00011/M00173/M00374/M006…
M00614	M_SnakePit_MAG_00001_contigs	Anoxygenic photosynthesis in green sulfur bacteria	Signature modules	Module set	Metabolic capacity	M00598 M00173	0.0	FALSE	0.18181818181818182	FALSE	NA	No enzymes unique to module	NA	K00174,K00175,K00176,K00177,K01006,K01677,K01678,K03737	915,916,914,917,256,925,924,850	K00176 is present in multiple modules: M00009/M00011/M00173/M00620/M00614,K03737 is present in multiple modules: M00307/M00173/M00614,K01678 is present in multiple modules: M00009/M00011/M00173/M00374/M00620/M00613/M00614,K00175 is present in multiple modules: M00009/M00011/M00173/M00620/M00614,K00174 is present in multiple modules: M00009/M00011/M00173/M00620/M00614,K01006 is present in multiple…
M00617	M_SnakePit_MAG_00001_contigs	Methanogen	Signature modules	Module set	Metabolic capacity	M00567,M00357,M00356,M00563	0.0	FALSE	0.3333333333333333	FALSE	NA	No enzymes unique to module	NA	K00625,K00925	961.96	K00625 is present in multiple modules: M00579/M00357/M00617/M00618,K00925 is present in multiple modules: M00579/M00357/M00617/M00618
M00618	M_SnakePit_MAG_00001_contigs	Acetogen	Signature modules	Module set	Metabolic capacity	M00377 M00579	0.5	FALSE	0.6428571428571428	FALSE	NA	No enzymes unique to module	NA	K00625,K00925,K01491,K01938,K15024	961,960,14,437,1356	K00625 is present in multiple modules: M00579/M00357/M00617/M00618,K00925 is present in multiple modules: M00579/M00357/M00617/M00618,K01938 is present in multiple modules: M00377/M00140/M00618,K15024 is present in multiple modules: M00579/M00618,K01491 is present in multiple modules: M00377/M00140/M00618
M00616	M_SnakePit_MAG_00001_contigs	Sulfate-sulfur assimilation	Signature modules	Module set	Metabolic capacity	(K02048,K23163)+K02046+K02047+K02045 M00176	0.0	FALSE	0.16666666666666666	FALSE	NA	No enzymes unique to module	NA	K00390	1183	K00390 is present in multiple modules: M00176/M00616

## Sheet: Supplementary Table 8
KEGG_MODULE_TAG
module	genome_name	module_name	module_class	module_category	module_subcategory	module_definition	stepwise_module_completeness	stepwise_module_is_complete	pathwise_module_completeness	pathwise_module_is_complete	proportion_unique_enzymes_present	enzymes_unique_to_module	unique_enzymes_hit_counts	enzyme_hits_in_module	gene_caller_ids_in_module	warnings
M00001	M_TAG_MAG_00001_contigs	Glycolysis (Embden-Meyerhof pathway), glucose => pyruvate	Pathway modules	Carbohydrate metabolism	Central carbohydrate metabolism	(K00844,K12407,K00845,K25026,K00886,K08074,K00918) (K01810,K06859,K13810,K15916) (K00850,K16370,K21071,K00918) (K01623,K01624,K11645,K16305,K16306) K01803 ((K00134,K00150) K00927,K11389) (K01834,K15633,K15634,K15635) K01689 (K00873,K12406)	0.8888888888888888	TRUE	0.9	TRUE	NA	No enzymes unique to module	NA	K00134,K00873,K00927,K01624,K01689,K01803,K01810,K15633,K25026	396,400,1168,899,1148,1150,368,1149,249	K01810 is present in multiple modules: M00001/M00004/M00892/M00909,K00927 is present in multiple modules: M00001/M00002/M00003/M00308/M00552/M00165/M00166/M00611/M00612,K01624 is present in multiple modules: M00001/M00003/M00165/M00167/M00345/M00344/M00611/M00612,K00134 is present in multiple modules: M00001/M00002/M00003/M00308/M00552/M00165/M00166/M00611/M00612,K01803 is present in multiple mod…
M00002	M_TAG_MAG_00001_contigs	Glycolysis, core module involving three-carbon compounds	Pathway modules	Carbohydrate metabolism	Central carbohydrate metabolism	K01803 ((K00134,K00150) K00927,K11389) (K01834,K15633,K15634,K15635) K01689 (K00873,K12406)	1.0	TRUE	1.0	TRUE	NA	No enzymes unique to module	NA	K00134,K00873,K00927,K01689,K01803,K15633	396,400,1168,1148,1150,1149	K00927 is present in multiple modules: M00001/M00002/M00003/M00308/M00552/M00165/M00166/M00611/M00612,K00134 is present in multiple modules: M00001/M00002/M00003/M00308/M00552/M00165/M00166/M00611/M00612,K01803 is present in multiple modules: M00001/M00002/M00003,K00873 is present in multiple modules: M00001/M00002,K15633 is present in multiple modules: M00001/M00002/M00003,K01689 is present in m…
M00003	M_TAG_MAG_00001_contigs	Gluconeogenesis, oxaloacetate => fructose-6P	Pathway modules	Carbohydrate metabolism	Central carbohydrate metabolism	(K01596,K01610) K01689 (K01834,K15633,K15634,K15635) K00927 (K00134,K00150) K01803 ((K01623,K01624,K11645) (K03841,K02446,K11532,K01086,K04041),K01622)	0.7142857142857143	FALSE	0.75	TRUE	NA	No enzymes unique to module	NA	K00134,K00927,K01624,K01689,K01803,K15633	396,1168,899,1148,1150,1149	K00927 is present in multiple modules: M00001/M00002/M00003/M00308/M00552/M00165/M00166/M00611/M00612,K01624 is present in multiple modules: M00001/M00003/M00165/M00167/M00345/M00344/M00611/M00612,K00134 is present in multiple modules: M00001/M00002/M00003/M00308/M00552/M00165/M00166/M00611/M00612,K01803 is present in multiple modules: M00001/M00002/M00003,K15633 is present in multiple modules: M…
M00307	M_TAG_MAG_00001_contigs	Pyruvate oxidation, pyruvate => acetyl-CoA	Pathway modules	Carbohydrate metabolism	Central carbohydrate metabolism	((K00163,K00161+K00162)+K00627+K00382-K13997),K00169+K00170+K00171+(K00172,K00189),K03737	1.0	TRUE	1.0	TRUE	NA	No enzymes unique to module	NA	K03737	743	K03737 is present in multiple modules: M00307/M00173/M00614
M00009	M_TAG_MAG_00001_contigs	Citrate cycle (TCA cycle, Krebs cycle)	Pathway modules	Carbohydrate metabolism	Central carbohydrate metabolism	(K01647,K05942) (K01681,K01682) (K00031,K00030) ((K00164+K00658,K01616)+K00382,K00174+K00175-K00177-K00176) (K01902+K01903,K01899+K01900,K18118) (K00234+K00235+K00236+(K00237,K25801),K00239+K00240+K00241-(K00242,K18859,K18860),K00244+K00245+K00246-K00247) (K01676,K01679,K01677+K01678) (K00026,K00025,K00024,K00116)	0.25	FALSE	0.25	FALSE	NA	No enzymes unique to module	NA	K00174,K00175,K00176,K00177,K01677,K01678	1123,1124,1122,1125,1129,1128	K00174 is present in multiple modules: M00009/M00011/M00173/M00620/M00614,K00176 is present in multiple modules: M00009/M00011/M00173/M00620/M00614,K00175 is present in multiple modules: M00009/M00011/M00173/M00620/M00614,K01678 is present in multiple modules: M00009/M00011/M00173/M00374/M00620/M00613/M00614,K00177 is present in multiple modules: M00009/M00011/M00173/M00620/M00614,K01677 is prese…
M00011	M_TAG_MAG_00001_contigs	Citrate cycle, second carbon oxidation, 2-oxoglutarate => oxaloacetate	Pathway modules	Carbohydrate metabolism	Central carbohydrate metabolism	((K00164+K00658,K01616)+K00382,K00174+K00175-K00177-K00176) (K01902+K01903,K01899+K01900,K18118) (K00234+K00235+K00236+(K00237,K25801),K00239+K00240+K00241-(K00242,K18859,K18860),K00244+K00245+K00246-K00247) (K01676,K01679,K01677+K01678) (K00026,K00025,K00024,K00116)	0.4	FALSE	0.4	FALSE	NA	No enzymes unique to module	NA	K00174,K00175,K00176,K00177,K01677,K01678	1123,1124,1122,1125,1129,1128	K00174 is present in multiple modules: M00009/M00011/M00173/M00620/M00614,K00176 is present in multiple modules: M00009/M00011/M00173/M00620/M00614,K00175 is present in multiple modules: M00009/M00011/M00173/M00620/M00614,K01678 is present in multiple modules: M00009/M00011/M00173/M00374/M00620/M00613/M00614,K00177 is present in multiple modules: M00009/M00011/M00173/M00620/M00614,K01677 is prese…
M00004	M_TAG_MAG_00001_contigs	Pentose phosphate pathway (Pentose phosphate cycle)	Pathway modules	Carbohydrate metabolism	Central carbohydrate metabolism	(K13937,((K00036,K19243) (K01057,K07404))) K00033 K01783 (K01807,K01808) K00615 ((K00616 (K01810,K06859,K15916)),K13810)	0.5	FALSE	0.5714285714285714	FALSE	NA	No enzymes unique to module	NA	K00615,K01783,K01808,K01810	758,118,635,368	K01783 is present in multiple modules: M00004/M00007,K01808 is present in multiple modules: M00004/M00007/M00165/M00167/M00611/M00612,K01810 is present in multiple modules: M00001/M00004/M00892/M00909,K00615 is present in multiple modules: M00004/M00007/M00165/M00167/M00611/M00612
M00007	M_TAG_MAG_00001_contigs	Pentose phosphate pathway, non-oxidative phase, fructose 6P => ribose 5P	Pathway modules	Carbohydrate metabolism	Central carbohydrate metabolism	K00615 (K00616,K13810) K01783 (K01807,K01808)	0.75	TRUE	0.75	TRUE	NA	No enzymes unique to module	NA	K00615,K01783,K01808	758,118,635	K01783 is present in multiple modules: M00004/M00007,K01808 is present in multiple modules: M00004/M00007/M00165/M00167/M00611/M00612,K00615 is present in multiple modules: M00004/M00007/M00165/M00167/M00611/M00612
M00005	M_TAG_MAG_00001_contigs	PRPP biosynthesis, ribose 5P => PRPP	Pathway modules	Carbohydrate metabolism	Central carbohydrate metabolism	K00948	1.0	TRUE	1.0	TRUE	1.0	K00948	1	K00948	1009	None
M00008	M_TAG_MAG_00001_contigs	Entner-Doudoroff pathway, glucose-6P => glyceraldehyde-3P + pyruvate	Pathway modules	Carbohydrate metabolism	Central carbohydrate metabolism	K00036 (K01057,K07404) K01690 K01625	0.25	FALSE	0.25	FALSE	NA	No enzymes unique to module	NA	K01625	539	K01625 is present in multiple modules: M00008/M00308/M00631/M00061
M00308	M_TAG_MAG_00001_contigs	Semi-phosphorylative Entner-Doudoroff pathway, gluconate => glycerate-3P	Pathway modules	Carbohydrate metabolism	Central carbohydrate metabolism	K05308 K00874 K01625 (K00134 K00927,K00131,K18978)	0.75	TRUE	0.8	TRUE	NA	No enzymes unique to module	NA	K00134,K00874,K00927,K01625	396,541,1168,539	K00927 is present in multiple modules: M00001/M00002/M00003/M00308/M00552/M00165/M00166/M00611/M00612,K01625 is present in multiple modules: M00008/M00308/M00631/M00061,K00134 is present in multiple modules: M00001/M00002/M00003/M00308/M00552/M00165/M00166/M00611/M00612,K00874 is present in multiple modules: M00308/M00631/M00061
M00631	M_TAG_MAG_00001_contigs	D-Galacturonate degradation (bacteria), D-galacturonate => pyruvate + D-glyceraldehyde 3P	Pathway modules	Carbohydrate metabolism	Other carbohydrate metabolism	K01812 K00041 (K01685,K16849+K16850) K00874 (K01625,K17463)	0.4	FALSE	0.4	FALSE	NA	No enzymes unique to module	NA	K00874,K01625	541.539	K01625 is present in multiple modules: M00008/M00308/M00631/M00061,K00874 is present in multiple modules: M00308/M00631/M00061
M00061	M_TAG_MAG_00001_contigs	D-Glucuronate degradation, D-glucuronate => pyruvate + D-glyceraldehyde 3P	Pathway modules	Carbohydrate metabolism	Other carbohydrate metabolism	K01812 K00040 (K01686,K08323) K00874 (K01625,K17463)	0.4	FALSE	0.4	FALSE	NA	No enzymes unique to module	NA	K00874,K01625	541.539	K01625 is present in multiple modules: M00008/M00308/M00631/M00061,K00874 is present in multiple modules: M00308/M00631/M00061
M00552	M_TAG_MAG_00001_contigs	D-galactonate degradation, De Ley-Doudoroff pathway, D-galactonate => glycerate-3P	Pathway modules	Carbohydrate metabolism	Other carbohydrate metabolism	K01684 K00883 K01631 K00134 K00927	0.4	FALSE	0.4	FALSE	NA	No enzymes unique to module	NA	K00134,K00927	396.117	K00927 is present in multiple modules: M00001/M00002/M00003/M00308/M00552/M00165/M00166/M00611/M00612,K00134 is present in multiple modules: M00001/M00002/M00003/M00308/M00552/M00165/M00166/M00611/M00612
M00854	M_TAG_MAG_00001_contigs	Glycogen biosynthesis, glucose-1P => glycogen/starch	Pathway modules	Carbohydrate metabolism	Other carbohydrate metabolism	(K00963 (K00693+K00750,K16150,K16153,K13679,K20812)),(K00975 (K00703,K13679,K20812)) (K00700,K16149)	1.0	TRUE	1.0	TRUE	NA	No enzymes unique to module	NA	K00700,K00703,K00975,K00975	721,875,336,337	K00700 is present in multiple modules: M00854/M00565,K00703 is present in multiple modules: M00854/M00565,K00975 is present in multiple modules: M00854/M00565
M00855	M_TAG_MAG_00001_contigs	Glycogen degradation, glycogen => glucose-6P	Pathway modules	Carbohydrate metabolism	Other carbohydrate metabolism	(K00688,K16153) (K01196,((K00705,K22451) (K02438,K01200))) (K15779,K01835,K15778)	0.6666666666666666	FALSE	0.75	TRUE	1.0	K00688,K00705	1.1	K00688,K00705,K01835	315,1303,322	K01835 is present in multiple modules: M00855/M00549
M00565	M_TAG_MAG_00001_contigs	Trehalose biosynthesis, D-glucose 1P => trehalose	Pathway modules	Carbohydrate metabolism	Other carbohydrate metabolism	K00975 K00703 (K00700,K16149) K01214 K06044 K01236	0.5	FALSE	0.5	FALSE	NA	No enzymes unique to module	NA	K00700,K00703,K00975,K00975	721,875,336,337	K00700 is present in multiple modules: M00854/M00565,K00703 is present in multiple modules: M00854/M00565,K00975 is present in multiple modules: M00854/M00565
M00549	M_TAG_MAG_00001_contigs	Nucleotide sugar biosynthesis, glucose => UDP-glucose	Pathway modules	Carbohydrate metabolism	Other carbohydrate metabolism	(K00844,K00845,K25026,K12407,K00886) (K01835,K15779,K15778) (K00963,K12447)	0.6666666666666666	FALSE	0.6666666666666666	FALSE	NA	No enzymes unique to module	NA	K01835,K25026	322.249	K25026 is present in multiple modules: M00001/M00549/M00909,K01835 is present in multiple modules: M00855/M00549
M00892	M_TAG_MAG_00001_contigs	UDP-N-acetyl-D-glucosamine biosynthesis, eukaryotes, glucose => UDP-GlcNAc	Pathway modules	Carbohydrate metabolism	Other carbohydrate metabolism	(K00844,K12407,K00845) K01810 K00820 K00621 K01836 K00972	0.16666666666666666	FALSE	0.16666666666666666	FALSE	NA	No enzymes unique to module	NA	K01810	368	K01810 is present in multiple modules: M00001/M00004/M00892/M00909
M00909	M_TAG_MAG_00001_contigs	UDP-N-acetyl-D-glucosamine biosynthesis, prokaryotes, glucose => UDP-GlcNAc	Pathway modules	Carbohydrate metabolism	Other carbohydrate metabolism	(K00845,K25026) (K01810,K13810,K15916) K00820 K03431 K04042	0.8	TRUE	0.8	TRUE	1.0	K03431,K04042	1.1	K01810,K03431,K04042,K25026	368,1328,305,249	K01810 is present in multiple modules: M00001/M00004/M00892/M00909,K25026 is present in multiple modules: M00001/M00549/M00909
M00373	M_TAG_MAG_00001_contigs	Ethylmalonyl pathway	Pathway modules	Carbohydrate metabolism	Other carbohydrate metabolism	K00626 K00023 K17865 K14446 K14447 K14448 K14449 K08691 K14451 K01965+K01966 K05606 K01847	0.16666666666666666	FALSE	0.16666666666666666	FALSE	1.0	K17865	1	K00626,K00626,K17865	124,269,1094	K00626 is present in multiple modules: M00373/M00375/M00374/M00088/M00957/M00095/M00849
M00740	M_TAG_MAG_00001_contigs	Methylaspartate cycle	Pathway modules	Carbohydrate metabolism	Other carbohydrate metabolism	K01647 K01681 K00031 K00261 K19268+K01846 K04835 K19280 K14449 K19281 K19282 K00024	0.18181818181818182	FALSE	0.18181818181818182	FALSE	1.0	K01846,K04835,K19268	1,1,2001	K01846,K04835,K19268	920,917,918	None
M00165	M_TAG_MAG_00001_contigs	Reductive pentose phosphate cycle (Calvin cycle)	Pathway modules	Energy metabolism	Carbon fixation	K00855 (K01601-K01602) K00927 (K05298,K00150,K00134) (K01623,K01624) (K03841,K02446,K11532,K01086) K00615 (K01623,K01624) (K01100,K11532,K01086) K00615 (K01807,K01808)	0.6363636363636364	FALSE	0.6363636363636364	FALSE	NA	No enzymes unique to module	NA	K00134,K00615,K00927,K01624,K01808	396,758,1168,899,635	K01808 is present in multiple modules: M00004/M00007/M00165/M00167/M00611/M00612,K00927 is present in multiple modules: M00001/M00002/M00003/M00308/M00552/M00165/M00166/M00611/M00612,K01624 is present in multiple modules: M00001/M00003/M00165/M00167/M00345/M00344/M00611/M00612,K00134 is present in multiple modules: M00001/M00002/M00003/M00308/M00552/M00165/M00166/M00611/M00612,K00615 is present i…
M00166	M_TAG_MAG_00001_contigs	Reductive pentose phosphate cycle, ribulose-5P => glyceraldehyde-3P	Pathway modules	Energy metabolism	Carbon fixation	K00855 (K01601-K01602) K00927 (K05298,K00150,K00134)	0.5	FALSE	0.5	FALSE	NA	No enzymes unique to module	NA	K00134,K00927	396.117	K00927 is present in multiple modules: M00001/M00002/M00003/M00308/M00552/M00165/M00166/M00611/M00612,K00134 is present in multiple modules: M00001/M00002/M00003/M00308/M00552/M00165/M00166/M00611/M00612
M00167	M_TAG_MAG_00001_contigs	Reductive pentose phosphate cycle, glyceraldehyde-3P => ribulose-5P	Pathway modules	Energy metabolism	Carbon fixation	(K01623,K01624) (K03841,K02446,K11532,K01086) K00615 (K01623,K01624) (K01100,K11532,K01086) K00615 (K01807,K01808)	0.7142857142857143	FALSE	0.7142857142857143	FALSE	NA	No enzymes unique to module	NA	K00615,K01624,K01808	758,899,635	K01808 is present in multiple modules: M00004/M00007/M00165/M00167/M00611/M00612,K01624 is present in multiple modules: M00001/M00003/M00165/M00167/M00345/M00344/M00611/M00612,K00615 is present in multiple modules: M00004/M00007/M00165/M00167/M00611/M00612
M00169	M_TAG_MAG_00001_contigs	CAM (Crassulacean acid metabolism), light	Pathway modules	Energy metabolism	Carbon fixation	K00029 K01006	0.5	FALSE	0.5	FALSE	NA	No enzymes unique to module	NA	K01006	43	K01006 is present in multiple modules: M00169/M00172/M00171/M00173/M00614
M00172	M_TAG_MAG_00001_contigs	C4-dicarboxylic acid cycle, NADP - malic enzyme type	Pathway modules	Energy metabolism	Carbon fixation	K01595 K00051 K00029 K01006	0.25	FALSE	0.25	FALSE	NA	No enzymes unique to module	NA	K01006	43	K01006 is present in multiple modules: M00169/M00172/M00171/M00173/M00614
M00171	M_TAG_MAG_00001_contigs	C4-dicarboxylic acid cycle, NAD - malic enzyme type	Pathway modules	Energy metabolism	Carbon fixation	K01595 K14454 K14455 (K00025,K00026) K00028 (K00814,K14272) K01006	0.14285714285714285	FALSE	0.14285714285714285	FALSE	NA	No enzymes unique to module	NA	K01006	43	K01006 is present in multiple modules: M00169/M00172/M00171/M00173/M00614
M00173	M_TAG_MAG_00001_contigs	Reductive citrate cycle (Arnon-Buchanan cycle)	Pathway modules	Energy metabolism	Carbon fixation	(K00169+K00170+K00171+K00172,K03737) ((K01007,K01006) K01595,K01959+K01960,K01958) K00024 (K01676,K01679,K01677+K01678) (K00239+K00240-K00241-K00242,K00244+K00245-K00246-K00247,K18556+K18557+K18558+K18559+K18560) (K01902+K01903) (K00174+K00175-K00177-K00176) K00031 (K01681,K01682) (K15230+K15231,K15232+K15233 K15234)	0.3	FALSE	0.36363636363636365	FALSE	NA	No enzymes unique to module	NA	K00174,K00175,K00176,K00177,K01006,K01677,K01678,K03737	1123,1124,1122,1125,43,1129,1128,743	K00174 is present in multiple modules: M00009/M00011/M00173/M00620/M00614,K01006 is present in multiple modules: M00169/M00172/M00171/M00173/M00614,K00176 is present in multiple modules: M00009/M00011/M00173/M00620/M00614,K00175 is present in multiple modules: M00009/M00011/M00173/M00620/M00614,K03737 is present in multiple modules: M00307/M00173/M00614,K01678 is present in multiple modules: M000…
M00376	M_TAG_MAG_00001_contigs	3-Hydroxypropionate bi-cycle	Pathway modules	Energy metabolism	Carbon fixation	(K02160+K01961+K01962+K01963) K14468 K14469 K15052 K05606 (K01847,K01848+K01849) (K14471+K14472) (K00239+K00240+K00241) K01679 K08691 K14449 K14470 K09709	0.07692307692307693	FALSE	0.07692307692307693	FALSE	NA	No enzymes unique to module	NA	K01961,K01962,K01963,K02160	358,356,357,360	K01961 is present in multiple modules: M00376/M00082/M00613,K02160 is present in multiple modules: M00376/M00082/M00613,K01962 is present in multiple modules: M00376/M00082/M00613,K01963 is present in multiple modules: M00376/M00082/M00613
M00375	M_TAG_MAG_00001_contigs	Hydroxypropionate-hydroxybutylate cycle	Pathway modules	Energy metabolism	Carbon fixation	(K01964+K15037+K15036) K15017 K15039 K15018 K15019 K15020 K05606 (K01848+K01849) (K15038,K15017) K14465 (K14466,K18861) K14534 K15016 K00626	0.07142857142857142	FALSE	0.07142857142857142	FALSE	NA	No enzymes unique to module	NA	K00626,K00626	124.269	K00626 is present in multiple modules: M00373/M00375/M00374/M00088/M00957/M00095/M00849
M00374	M_TAG_MAG_00001_contigs	Dicarboxylate-hydroxybutyrate cycle	Pathway modules	Energy metabolism	Carbon fixation	(K00169+K00170+K00171+K00172) K01007 K01595 K00024 (K01677+K01678) (K00239+K00240-K00241-K18860) (K01902+K01903) (K15038,K15017) K14465 (K14467,K18861) K14534 K15016 K00626	0.15384615384615385	FALSE	0.15384615384615385	FALSE	NA	No enzymes unique to module	NA	K00626,K00626,K01677,K01678	124,269,1129,1128	K00626 is present in multiple modules: M00373/M00375/M00374/M00088/M00957/M00095/M00849,K01678 is present in multiple modules: M00009/M00011/M00173/M00374/M00620/M00613/M00614,K01677 is present in multiple modules: M00009/M00011/M00173/M00374/M00620/M00613/M00614
M00377	M_TAG_MAG_00001_contigs	Reductive acetyl-CoA pathway (Wood-Ljungdahl pathway)	Pathway modules	Energy metabolism	Carbon fixation	K00198 (K05299-K15022,K22015+K25123+K25124) K01938 K01491-K01500 K00297-K25007-K25008 K15023 K14138+K00197+K00194	0.2857142857142857	FALSE	0.2857142857142857	FALSE	NA	No enzymes unique to module	NA	K01491,K01500,K01938	565,179,238	K01938 is present in multiple modules: M00377/M00140/M00618,K01491 is present in multiple modules: M00377/M00140/M00618,K01500 is present in multiple modules: M00377/M00140
M00579	M_TAG_MAG_00001_contigs	Phosphate acetyltransferase-acetate kinase pathway, acetyl-CoA => acetate	Pathway modules	Energy metabolism	Carbon fixation	(K00625,K13788,K15024) K00925	1.0	TRUE	1.0	TRUE	NA	No enzymes unique to module	NA	K00625,K00925,K15024	1166,1165,278	K00925 is present in multiple modules: M00579/M00357/M00617/M00618,K15024 is present in multiple modules: M00579/M00618,K00625 is present in multiple modules: M00579/M00357/M00617/M00618
M00620	M_TAG_MAG_00001_contigs	Incomplete reductive citrate cycle, acetyl-CoA => oxoglutarate	Pathway modules	Energy metabolism	Carbon fixation	(K00169+K00170+K00171+K00172) (K01959+K01960) K00024 (K01677+K01678) (K18209+K18210) (K01902+K01903) (K00174+K00175+K00176+K00177)	0.2857142857142857	FALSE	0.2857142857142857	FALSE	NA	No enzymes unique to module	NA	K00174,K00175,K00176,K00177,K01677,K01678	1123,1124,1122,1125,1129,1128	K00174 is present in multiple modules: M00009/M00011/M00173/M00620/M00614,K00176 is present in multiple modules: M00009/M00011/M00173/M00620/M00614,K00175 is present in multiple modules: M00009/M00011/M00173/M00620/M00614,K01678 is present in multiple modules: M00009/M00011/M00173/M00374/M00620/M00613/M00614,K00177 is present in multiple modules: M00009/M00011/M00173/M00620/M00614,K01677 is prese…
M00357	M_TAG_MAG_00001_contigs	Methanogenesis, acetate => methane	Pathway modules	Energy metabolism	Methane metabolism	((K00925 K00625),K01895) (K00193+K00197+K00194) (K00577+K00578+K00579+K00580+K00581-K00582-K00583+K00584) (K00399+K00401+K00402) (K22480+K22481+K22482,K03388+K03389+K03390,K08264+K08265,K03388+K03389+K03390+K14127+(K14126+K14128,K22516+K00125))	0.2	FALSE	0.3333333333333333	FALSE	NA	No enzymes unique to module	NA	K00625,K00925	1166.12	K00925 is present in multiple modules: M00579/M00357/M00617/M00618,K00625 is present in multiple modules: M00579/M00357/M00617/M00618
M00346	M_TAG_MAG_00001_contigs	Formaldehyde assimilation, serine pathway	Pathway modules	Energy metabolism	Methane metabolism	K00600 K00830 K00018 K11529 K01689 K01595 K00024 K08692+K14067 K08691	0.1111111111111111	FALSE	0.1111111111111111	FALSE	NA	No enzymes unique to module	NA	K01689	1148	K01689 is present in multiple modules: M00001/M00002/M00003/M00346
M00345	M_TAG_MAG_00001_contigs	Formaldehyde assimilation, ribulose monophosphate pathway	Pathway modules	Energy metabolism	Methane metabolism	(((K08093,K13812) K08094),K13831) (K00850,K16370,K21071) K01624	0.3333333333333333	FALSE	0.3333333333333333	FALSE	NA	No enzymes unique to module	NA	K01624	899	K01624 is present in multiple modules: M00001/M00003/M00165/M00167/M00345/M00344/M00611/M00612
M00344	M_TAG_MAG_00001_contigs	Formaldehyde assimilation, xylulose monophosphate pathway	Pathway modules	Energy metabolism	Methane metabolism	K17100 K00863 K01624 K03841	0.25	FALSE	0.25	FALSE	NA	No enzymes unique to module	NA	K01624	899	K01624 is present in multiple modules: M00001/M00003/M00165/M00167/M00345/M00344/M00611/M00612
M00176	M_TAG_MAG_00001_contigs	Assimilatory sulfate reduction, sulfate => H2S	Pathway modules	Energy metabolism	Sulfur metabolism	(((K13811,K00958+K00860,K00955+K00957,K00956+K00957+K00860) K00390),(K13811 K05907)) (K00380+K00381,K00392)	0.0	FALSE	0.3333333333333333	FALSE	NA	No enzymes unique to module	NA	K00390	907	K00390 is present in multiple modules: M00176/M00616
M00144	M_TAG_MAG_00001_contigs	NADH:quinone oxidoreductase, prokaryotes	Pathway modules	Energy metabolism	ATP synthesis	K00330+(K00331+K00332+K00333,K00331+K13378,K13380)+K00334+K00335+K00336+K00337+K00338+K00339+K00340+(K00341+K00342)+K00343	0.0	FALSE	0.08333333333333333	FALSE	1.0	K00335	1	K00335	143	None
M00153	M_TAG_MAG_00001_contigs	Cytochrome bd ubiquinol oxidase	Pathway modules	Energy metabolism	ATP synthesis	K00425+K00426+(K00424,K22501)	0.0	FALSE	0.6666666666666666	FALSE	1.0	K00425,K00426	1.1	K00425,K00426	752.751	None
M00157	M_TAG_MAG_00001_contigs	F-type ATPase, prokaryotes and chloroplasts	Pathway modules	Energy metabolism	ATP synthesis	K02111+K02112+K02113+K02114+K02115+K02108+K02109+K02110	1.0	TRUE	1.0	TRUE	1.0	K02108,K02109,K02110,K02111,K02112,K02113,K02114,K02115	1,1,1,1,1,1,1,1	K02108,K02109,K02110,K02111,K02112,K02113,K02114,K02115	640,642,641,644,646,643,647,645	None
M00082	M_TAG_MAG_00001_contigs	Fatty acid biosynthesis, initiation	Pathway modules	Lipid metabolism	Fatty acid metabolism	(K11262,(K02160+K01961,K11263)+(K01962+K01963,K18472)) (K00665,K00667+K00668,K11533,(K00645 (K00648,K18473)))	1.0	TRUE	1.0	TRUE	1.0	K00648	1	K00645,K00648,K01961,K01962,K01963,K02160	363,365,358,356,357,360	K01963 is present in multiple modules: M00376/M00082/M00613,K01962 is present in multiple modules: M00376/M00082/M00613,K01961 is present in multiple modules: M00376/M00082/M00613,K02160 is present in multiple modules: M00376/M00082/M00613,K00645 is present in multiple modules: M00082/M00873/M00874
M00083	M_TAG_MAG_00001_contigs	Fatty acid biosynthesis, elongation	Pathway modules	Lipid metabolism	Fatty acid metabolism	K00665,(K00667 K00668),K11533,((K00647,K09458) K00059 (K02372,K01716,K16363) (K00208,K02371,K10780,K00209))	1.0	TRUE	1.0	TRUE	1.0	K02371	1	K00059,K00059,K00059,K02371,K02372,K09458	362,123,888,364,359,361	K09458 is present in multiple modules: M00083/M00873/M00874/M00572,K02372 is present in multiple modules: M00083/M00572,K00059 is present in multiple modules: M00083/M00874/M00572
M00873	M_TAG_MAG_00001_contigs	Fatty acid biosynthesis in mitochondria, animals	Pathway modules	Lipid metabolism	Fatty acid metabolism	K18660 K03955+K00645 K09458 K11539+K13370 K22540 K07512	0.16666666666666666	FALSE	0.25	FALSE	NA	No enzymes unique to module	NA	K00645,K09458	363.361	K09458 is present in multiple modules: M00083/M00873/M00874/M00572,K00645 is present in multiple modules: M00082/M00873/M00874
M00874	M_TAG_MAG_00001_contigs	Fatty acid biosynthesis in mitochondria, fungi	Pathway modules	Lipid metabolism	Fatty acid metabolism	K11262 K03955+K00645 K09458 K00059 K22541 K07512	0.3333333333333333	FALSE	0.4166666666666667	FALSE	NA	No enzymes unique to module	NA	K00059,K00059,K00059,K00645,K09458	362,123,888,363,361	K09458 is present in multiple modules: M00083/M00873/M00874/M00572,K00645 is present in multiple modules: M00082/M00873/M00874,K00059 is present in multiple modules: M00083/M00874/M00572
M00087	M_TAG_MAG_00001_contigs	beta-Oxidation	Pathway modules	Lipid metabolism	Fatty acid metabolism	(K00232,K00249,K00255,K06445,K09479) (((K01692,K07511,K13767) (K00022,K07516)),K01825,K01782,K07514,K07515,K10527) (K00632,K07508,K07509,K07513)	0.0	FALSE	0.25	FALSE	1.0	K07516	1	K07516	268	None
M00088	M_TAG_MAG_00001_contigs	Ketone body biosynthesis, acetyl-CoA => acetoacetate/3-hydroxybutyrate/acetone	Pathway modules	Lipid metabolism	Lipid metabolism	K00626 K01641 K01640 K00019 K01574	0.2	FALSE	0.2	FALSE	NA	No enzymes unique to module	NA	K00626,K00626	124.269	K00626 is present in multiple modules: M00373/M00375/M00374/M00088/M00957/M00095/M00849
M00089	M_TAG_MAG_00001_contigs	Triacylglycerol biosynthesis	Pathway modules	Lipid metabolism	Lipid metabolism	(K00629,K13506,K13507,K00630,K13508) (K00655,K13509,K13523,K19007,K13513,K13517,K13519,K14674,K22831) (K01080,K15728,K18693) (K11155,K11160,K14456,K22848,K22849)	0.25	FALSE	0.25	FALSE	1.0	K00655	1	K00655	1146	None
M00093	M_TAG_MAG_00001_contigs	Phosphatidylethanolamine (PE) biosynthesis, PA => PS => PE	Pathway modules	Lipid metabolism	Lipid metabolism	K00981 (K00998,K17103) K01613	0.3333333333333333	FALSE	0.3333333333333333	FALSE	1.0	K00981	1	K00981	762	None
M00048	M_TAG_MAG_00001_contigs	De novo purine biosynthesis, PRPP + glutamine => IMP	Pathway modules	Nucleotide metabolism	Purine metabolism	K00764 (K01945,K11787,K11788,K13713) (K00601,K11175,K08289,K11787,K01492) (K01952,(K23269+K23264+K23265),(K23270+K23265)) (K01933,K11787,K11788 (K01587,K11808,K01589 K01588)) (K01923,K01587,K13713) K01756 (K00602,(K01492,K06863 K11176))	0.125	FALSE	0.125	FALSE	NA	No enzymes unique to module	NA	K01756	1064	K01756 is present in multiple modules: M00048/M00049
M00049	M_TAG_MAG_00001_contigs	Adenine ribonucleotide biosynthesis, IMP => ADP,ATP	Pathway modules	Nucleotide metabolism	Purine metabolism	K01939 K01756 (K00939,K18532,K18533,K00944) K00940	0.75	TRUE	0.75	TRUE	1.0	K00939,K01939	1.1	K00939,K01756,K01939	954,1064,1063	K01756 is present in multiple modules: M00048/M00049
M00050	M_TAG_MAG_00001_contigs	Guanine ribonucleotide biosynthesis, IMP => GDP,GTP	Pathway modules	Nucleotide metabolism	Purine metabolism	K00088 K01951 K00942 (K00940,K18533)	0.75	TRUE	0.75	TRUE	1.0	K00088,K00942,K01951	2,1,2001	K00088,K00088,K00942,K01951	1465,691,445,1464	None
M00958	M_TAG_MAG_00001_contigs	Adenine ribonucleotide degradation, AMP => Urate	Pathway modules	Nucleotide metabolism	Purine metabolism	((K01490 (K01081,K19970,K03787,K18550)),((K01081,K19970,K11751,K03787,K02566,K08693) (K01488,K19572,K05810))) (K03783,K03784,K09913,K05810) (K00106,K00087+K13479+K13480,K13481+K13482,K11177+K11178+K13483)	0.3333333333333333	FALSE	0.25	FALSE	NA	No enzymes unique to module	NA	K03784	464	K03784 is present in multiple modules: M00958/M00959
M00959	M_TAG_MAG_00001_contigs	Guanine ribonucleotide degradation, GMP => Urate	Pathway modules	Nucleotide metabolism	Purine metabolism	(K01081,K19970,K11751,K03787,K02566,K08693,K20881) (K03783,K03784,K09913,K05810) K01487 (K00106,K00087+K13479+K13480,K13481+K13482,K11177+K11178+K13483)	0.25	FALSE	0.25	FALSE	NA	No enzymes unique to module	NA	K03784	464	K03784 is present in multiple modules: M00958/M00959
M00051	M_TAG_MAG_00001_contigs	De novo pyrimidine biosynthesis, glutamine (+ PRPP) => UMP	Pathway modules	Nucleotide metabolism	Pyrimidine metabolism	(K11540,(K11541 K01465),((K01954,K01955+K01956) (K00609+K00610,K00608) K01465)) (K00226,K00254,K17828) (K13421,K00762 K01591)	0.0	FALSE	0.3	FALSE	1.0	K00609,K01465	1.1	K00609,K01465	1359.14	None
M00052	M_TAG_MAG_00001_contigs	Pyrimidine ribonucleotide biosynthesis, UMP => UDP/UTP,CDP/CTP	Pathway modules	Nucleotide metabolism	Pyrimidine metabolism	(K13800,K13809,K09903) (K00940,K18533) K01937	0.6666666666666666	FALSE	0.6666666666666666	FALSE	1.0	K01937,K09903	1.1	K01937,K09903	310.12	None
M00938	M_TAG_MAG_00001_contigs	Pyrimidine deoxyribonucleotide biosynthesis, UDP => dTTP	Pathway modules	Nucleotide metabolism	Pyrimidine metabolism	(K00525+K00526,K10807+K10808) (K00940,K18533) K01520 (K00560,K13998,K03465) K00943	0.6	FALSE	0.6	FALSE	1.0	K00560,K00943,K01520	1,1,2001	K00560,K00943,K01520	671,1302,62	None
M00018	M_TAG_MAG_00001_contigs	Threonine biosynthesis, aspartate => homoserine => threonine	Pathway modules	Amino acid metabolism	Serine and threonine metabolism	(K00928,K12524,K12525,K12526) K00133 (K00003,K12524,K12525) (K00872,K02204,K02203) K01733	0.4	FALSE	0.4	FALSE	NA	No enzymes unique to module	NA	K00133,K00928	1394.1	K00133 is present in multiple modules: M00018/M00033/M00017/M00016/M00525/M00526/M00527,K00928 is present in multiple modules: M00018/M00033/M00017/M00016/M00525/M00526/M00527
M00033	M_TAG_MAG_00001_contigs	Ectoine biosynthesis, aspartate => ectoine	Pathway modules	Amino acid metabolism	Serine and threonine metabolism	K00928 K00133 K00836 K06718 K06720	0.4	FALSE	0.4	FALSE	NA	No enzymes unique to module	NA	K00133,K00928	1394.1	K00133 is present in multiple modules: M00018/M00033/M00017/M00016/M00525/M00526/M00527,K00928 is present in multiple modules: M00018/M00033/M00017/M00016/M00525/M00526/M00527
M00609	M_TAG_MAG_00001_contigs	Cysteine biosynthesis, methionine => cysteine	Pathway modules	Amino acid metabolism	Cysteine and methionine metabolism	K00789 K17462 K01243 K07173 K17216 K17217	0.3333333333333333	FALSE	0.3333333333333333	FALSE	NA	No enzymes unique to module	NA	K00789,K01243	731.133	K00789 is present in multiple modules: M00609/M00034/M00035/M00368/M00953,K01243 is present in multiple modules: M00609/M00034
M00017	M_TAG_MAG_00001_contigs	Methionine biosynthesis, aspartate => homoserine => methionine	Pathway modules	Amino acid metabolism	Cysteine and methionine metabolism	(K00928,K12524,K12525) K00133 (K00003,K12524,K12525) (K00651,K00641) K01739 (K01760,K14155) (K00548,K24042,K00549)	0.2857142857142857	FALSE	0.2857142857142857	FALSE	NA	No enzymes unique to module	NA	K00133,K00928	1394.1	K00133 is present in multiple modules: M00018/M00033/M00017/M00016/M00525/M00526/M00527,K00928 is present in multiple modules: M00018/M00033/M00017/M00016/M00525/M00526/M00527
M00034	M_TAG_MAG_00001_contigs	Methionine salvage pathway	Pathway modules	Amino acid metabolism	Cysteine and methionine metabolism	K00789 K01611 K00797 ((K01243,K01244) K00899,(K00772,K05810)) K08963 (K16054,K08964 (K09880,K08965 K08966)) K08967 (K00815,K08969,K23977,K00832,K00838)	0.25	FALSE	0.3333333333333333	FALSE	NA	No enzymes unique to module	NA	K00789,K00797,K01243	731,766,1326	K00789 is present in multiple modules: M00609/M00034/M00035/M00368/M00953,K00797 is present in multiple modules: M00034/M00133,K01243 is present in multiple modules: M00609/M00034
M00035	M_TAG_MAG_00001_contigs	Methionine degradation	Pathway modules	Amino acid metabolism	Cysteine and methionine metabolism	K00789 (K00552,K00558,K17398,K17399) K01251 (K01697,K10150)	0.5	FALSE	0.5	FALSE	1.0	K00558	3	K00558,K00558,K00558,K00789	891,956,972,731	K00789 is present in multiple modules: M00609/M00034/M00035/M00368/M00953
M00368	M_TAG_MAG_00001_contigs	Ethylene biosynthesis, methionine => ethylene	Pathway modules	Amino acid metabolism	Cysteine and methionine metabolism	K00789 (K01762,K20772) K05933	0.3333333333333333	FALSE	0.3333333333333333	FALSE	NA	No enzymes unique to module	NA	K00789	731	K00789 is present in multiple modules: M00609/M00034/M00035/M00368/M00953
M00016	M_TAG_MAG_00001_contigs	Lysine biosynthesis, succinyl-DAP pathway, aspartate => lysine	Pathway modules	Amino acid metabolism	Lysine metabolism	(K00928,K12524,K12525,K12526) K00133 K01714 K00215 K00674 (K00821,K14267) K01439 K01778 (K01586,K12526)	0.6666666666666666	FALSE	0.6666666666666666	FALSE	1.0	K01439	1	K00133,K00928,K01439,K01586,K01714,K01778	1394,1015,232,553,1393,554	K01778 is present in multiple modules: M00016/M00525/M00527,K00133 is present in multiple modules: M00018/M00033/M00017/M00016/M00525/M00526/M00527,K01586 is present in multiple modules: M00016/M00525/M00526/M00527,K00928 is present in multiple modules: M00018/M00033/M00017/M00016/M00525/M00526/M00527,K01714 is present in multiple modules: M00016/M00525/M00526/M00527
M00525	M_TAG_MAG_00001_contigs	Lysine biosynthesis, acetyl-DAP pathway, aspartate => lysine	Pathway modules	Amino acid metabolism	Lysine metabolism	K00928 K00133 K01714 K00215 K05822 K00841 K05823 K01778 K01586	0.6666666666666666	FALSE	0.6666666666666666	FALSE	1.0	K05823	1	K00133,K00928,K01586,K01714,K01778,K05823	1394,1015,553,1393,554,218	K01778 is present in multiple modules: M00016/M00525/M00527,K00133 is present in multiple modules: M00018/M00033/M00017/M00016/M00525/M00526/M00527,K01586 is present in multiple modules: M00016/M00525/M00526/M00527,K00928 is present in multiple modules: M00018/M00033/M00017/M00016/M00525/M00526/M00527,K01714 is present in multiple modules: M00016/M00525/M00526/M00527
M00526	M_TAG_MAG_00001_contigs	Lysine biosynthesis, DAP dehydrogenase pathway, aspartate => lysine	Pathway modules	Amino acid metabolism	Lysine metabolism	(K00928,K12524,K12525,K12526) K00133 K01714 K00215 K03340 (K01586,K12526)	0.6666666666666666	FALSE	0.6666666666666666	FALSE	NA	No enzymes unique to module	NA	K00133,K00928,K01586,K01714	1394,1015,553,1393	K01586 is present in multiple modules: M00016/M00525/M00526/M00527,K01714 is present in multiple modules: M00016/M00525/M00526/M00527,K00133 is present in multiple modules: M00018/M00033/M00017/M00016/M00525/M00526/M00527,K00928 is present in multiple modules: M00018/M00033/M00017/M00016/M00525/M00526/M00527
M00527	M_TAG_MAG_00001_contigs	Lysine biosynthesis, DAP aminotransferase pathway, aspartate => lysine	Pathway modules	Amino acid metabolism	Lysine metabolism	(K00928,K12524,K12525,K12526) K00133 K01714 K00215 K10206 K01778 (K01586,K12526)	0.7142857142857143	FALSE	0.7142857142857143	FALSE	NA	No enzymes unique to module	NA	K00133,K00928,K01586,K01714,K01778	1394,1015,553,1393,554	K01778 is present in multiple modules: M00016/M00525/M00527,K00133 is present in multiple modules: M00018/M00033/M00017/M00016/M00525/M00526/M00527,K01586 is present in multiple modules: M00016/M00525/M00526/M00527,K00928 is present in multiple modules: M00018/M00033/M00017/M00016/M00525/M00526/M00527,K01714 is present in multiple modules: M00016/M00525/M00526/M00527
M00957	M_TAG_MAG_00001_contigs	Lysine degradation, bacteria, L-lysine => glutarate => succinate/acetyl-CoA	Pathway modules	Amino acid metabolism	Lysine metabolism	K00468 K01506 (K14268,K07250) K00135 ((K15737 K15736),(K01041 K00252 (K01692,K01825,K01782) (K01825,K01782) K00626))	0.0	FALSE	0.1111111111111111	FALSE	NA	No enzymes unique to module	NA	K00626,K00626	124.269	K00626 is present in multiple modules: M00373/M00375/M00374/M00088/M00957/M00095/M00849
M00133	M_TAG_MAG_00001_contigs	Polyamine biosynthesis, arginine => agmatine => putrescine => spermidine	Pathway modules	Amino acid metabolism	Polyamine biosynthesis	(K01583,K01584,K01585,K02626) K01480 K01611 K00797	0.75	TRUE	0.75	TRUE	1.0	K01480,K01585	1.3	K00797,K01480,K01585,K01585,K01585	766,765,767,1227,173	K00797 is present in multiple modules: M00034/M00133
M00026	M_TAG_MAG_00001_contigs	Histidine biosynthesis, PRPP => histidine	Pathway modules	Amino acid metabolism	Histidine metabolism	(K00765-K02502) (K01523 K01496,K11755,K14152) (K01814,K24017) (K02501+K02500,K01663) ((K01693 K00817 (K04486,K05602,K18649)),(K01089 K00817)) (K00013,K14152)	0.0	FALSE	0.125	FALSE	1.0	K04486	1	K04486	1169	None
M00045	M_TAG_MAG_00001_contigs	Histidine degradation, histidine => N-formiminoglutamate => glutamate	Pathway modules	Amino acid metabolism	Histidine metabolism	K01745 K01712 K01468 (K01479,K00603,K13990,(K05603 K01458))	1.0	TRUE	1.0	TRUE	1.0	K00603,K01468,K01712,K01745	1,1,1,1	K00603,K01468,K01712,K01745	177,178,176,180	None
M00022	M_TAG_MAG_00001_contigs	Shikimate pathway, phosphoenolpyruvate + erythrose-4P => chorismate	Pathway modules	Amino acid metabolism	Aromatic amino acid metabolism	(K01626,K03856,K13853) (((K01735,K13829) ((K03785,K03786) K00014,K13832)),K13830) ((K00891,K13829) (K00800,K24018),K13830) K01736	0.5	FALSE	0.7142857142857143	FALSE	1.0	K00800,K00891,K01735,K01736,K03786	1,1,1,1,1	K00800,K00891,K01735,K01736,K03786	1,6,4,3,5	None
M00118	M_TAG_MAG_00001_contigs	Glutathione biosynthesis, glutamate => glutathione	Pathway modules	Amino acid metabolism	Other amino acid metabolism	(K11204+K11205,K01919) (K21456,K01920)	0.5	FALSE	0.5	FALSE	1.0	K01919	1	K01919	467	None
M00923	M_TAG_MAG_00001_contigs	UDP-L-FucNAm biosynthesis	Pathway modules	Glycan metabolism	Lipopolysaccharide metabolism	K15894 K19068 K24258 K24259	0.25	FALSE	0.25	FALSE	1.0	K15894	1	K15894	678	None
M00127	M_TAG_MAG_00001_contigs	Thiamine biosynthesis, prokaryotes, AIR (+ DXP/tyrosine) => TMP/TPP	Pathway modules	Metabolism of cofactors and vitamins	Cofactor and vitamin metabolism	K03148+K03154 K03151 K03150 K03149 K03147 ((K00941 K00788),K14153,K21219) K00946	0.2857142857142857	FALSE	0.2857142857142857	FALSE	1.0	K03150	1	K03150,K03151	150.799	K03151 is present in multiple modules: M00127/M00895
M00895	M_TAG_MAG_00001_contigs	Thiamine biosynthesis, prokaryotes, AIR (+ DXP/glycine) => TMP/TPP	Pathway modules	Metabolism of cofactors and vitamins	Cofactor and vitamin metabolism	K03148+K03154 K03151 K03153 K03149 K10810 K03147 K00941 K00788 K00946	0.1111111111111111	FALSE	0.1111111111111111	FALSE	NA	No enzymes unique to module	NA	K03151	799	K03151 is present in multiple modules: M00127/M00895
M00897	M_TAG_MAG_00001_contigs	Thiamine biosynthesis, plants, AIR (+ NAD+) => TMP/thiamine/TPP	Pathway modules	Metabolism of cofactors and vitamins	Cofactor and vitamin metabolism	K03146 K03147 K14153 K22911 K00949	0.2	FALSE	0.2	FALSE	NA	No enzymes unique to module	NA	K00949	119	K00949 is present in multiple modules: M00897/M00898
M00898	M_TAG_MAG_00001_contigs	Thiamine biosynthesis, pyridoxal-5P => TMP/thiamine/TPP	Pathway modules	Metabolism of cofactors and vitamins	Cofactor and vitamin metabolism	K03146 K18278 K00877 K14154 -- K00949	0.16666666666666666	FALSE	0.16666666666666666	FALSE	NA	No enzymes unique to module	NA	K00949	119	--' steps are assumed incomplete,K00949 is present in multiple modules: M00897/M00898
M00125	M_TAG_MAG_00001_contigs	Riboflavin biosynthesis, plants and bacteria, GTP => riboflavin/FMN/FAD	Pathway modules	Metabolism of cofactors and vitamins	Cofactor and vitamin metabolism	(K01497,K14652) (K01498 K00082,K11752) (K22912,K20860,K20861,K20862,K21063,K21064) (K02858,K14652) K00794 K00793 (K20884 K22949,K11753)	0.2857142857142857	FALSE	0.2857142857142857	FALSE	1.0	K11753,K21064	1.2	K11753,K21064,K21064	204,1431,99	None
M00115	M_TAG_MAG_00001_contigs	NAD biosynthesis, aspartate => quinolinate => NAD	Pathway modules	Metabolism of cofactors and vitamins	Cofactor and vitamin metabolism	(K00278,K06989) K03517 K00767 (K00969,K06210) (K01916,K01950)	0.4	FALSE	0.4	FALSE	NA	No enzymes unique to module	NA	K00969,K01916	879.893	K01916 is present in multiple modules: M00115/M00912,K00969 is present in multiple modules: M00115/M00912
M00912	M_TAG_MAG_00001_contigs	NAD biosynthesis, tryptophan => quinolinate => NAD	Pathway modules	Metabolism of cofactors and vitamins	Cofactor and vitamin metabolism	(K00453,K00463) (K01432,K14263,K07130) K00486 K01556 K00452 K00767 (K00969,K06210) (K01916,K01950)	0.25	FALSE	0.25	FALSE	NA	No enzymes unique to module	NA	K00969,K01916	879.893	K01916 is present in multiple modules: M00115/M00912,K00969 is present in multiple modules: M00115/M00912
M00120	M_TAG_MAG_00001_contigs	Coenzyme A biosynthesis, pantothenate => CoA	Pathway modules	Metabolism of cofactors and vitamins	Cofactor and vitamin metabolism	(K00867,K03525,K01947,K09680) ((K01922,K21977) K01598,K13038) (K02318,(K00954,K02201) K00859)	0.6666666666666666	FALSE	0.75	TRUE	1.0	K00859,K00954,K03525	1,1,2001	K00859,K00954,K03525	440,1139,1411	None
M00572	M_TAG_MAG_00001_contigs	Pimeloyl-ACP biosynthesis, BioC-BioH pathway, malonyl-ACP => pimeloyl-ACP	Pathway modules	Metabolism of cofactors and vitamins	Cofactor and vitamin metabolism	K02169 (K00647,K09458) K00059 K02372 K00208 (K02170,K09789,K19560,K19561)	0.5	FALSE	0.5	FALSE	NA	No enzymes unique to module	NA	K00059,K00059,K00059,K02372,K09458	362,123,888,359,361	K09458 is present in multiple modules: M00083/M00873/M00874/M00572,K02372 is present in multiple modules: M00083/M00572,K00059 is present in multiple modules: M00083/M00874/M00572
M00123	M_TAG_MAG_00001_contigs	Biotin biosynthesis, pimeloyl-ACP/CoA => biotin	Pathway modules	Metabolism of cofactors and vitamins	Cofactor and vitamin metabolism	K00652 ((K00833,K19563) K01935,K19562) K01012	0.3333333333333333	FALSE	0.3333333333333333	FALSE	NA	No enzymes unique to module	NA	K01012	145	K01012 is present in multiple modules: M00123/M00950/M00573/M00577
M00950	M_TAG_MAG_00001_contigs	Biotin biosynthesis, BioU pathway, pimeloyl-ACP/CoA => biotin	Pathway modules	Metabolism of cofactors and vitamins	Cofactor and vitamin metabolism	K00652 K25570 K01935 K01012	0.25	FALSE	0.25	FALSE	NA	No enzymes unique to module	NA	K01012	145	K01012 is present in multiple modules: M00123/M00950/M00573/M00577
M00573	M_TAG_MAG_00001_contigs	Biotin biosynthesis, BioI pathway, long-chain-acyl-ACP => pimeloyl-ACP => biotin	Pathway modules	Metabolism of cofactors and vitamins	Cofactor and vitamin metabolism	K16593 K00652 K19563 K01935 K01012	0.2	FALSE	0.2	FALSE	NA	No enzymes unique to module	NA	K01012	145	K01012 is present in multiple modules: M00123/M00950/M00573/M00577
M00577	M_TAG_MAG_00001_contigs	Biotin biosynthesis, BioW pathway, pimelate => pimeloyl-CoA => biotin	Pathway modules	Metabolism of cofactors and vitamins	Cofactor and vitamin metabolism	K01906 K00652 (K00833,K19563) K01935 K01012	0.2	FALSE	0.2	FALSE	NA	No enzymes unique to module	NA	K01012	145	K01012 is present in multiple modules: M00123/M00950/M00573/M00577
M00126	M_TAG_MAG_00001_contigs	Tetrahydrofolate biosynthesis, GTP => THF	Pathway modules	Metabolism of cofactors and vitamins	Cofactor and vitamin metabolism	(K01495,K09007,K22391) (K01077,K01113,(K08310,K19965)) ((K13939,(K13940,K01633 K00950) K00796),(K01633 K13941)) (K11754,K20457) (K00287,K13998)	0.4	FALSE	0.4	FALSE	1.0	K22391	1	K00287,K22391	925.103	K00287 is present in multiple modules: M00126/M00840
M00840	M_TAG_MAG_00001_contigs	Tetrahydrofolate biosynthesis, mediated by ribA and trpF, GTP => THF	Pathway modules	Metabolism of cofactors and vitamins	Cofactor and vitamin metabolism	K14652 K22100 -- K01633 K13941 K22099 K00287	0.14285714285714285	FALSE	0.14285714285714285	FALSE	NA	No enzymes unique to module	NA	K00287	925	K00287 is present in multiple modules: M00126/M00840,'--' steps are assumed incomplete
M00140	M_TAG_MAG_00001_contigs	C1-unit interconversion, prokaryotes	Pathway modules	Metabolism of cofactors and vitamins	Cofactor and vitamin metabolism	K00600 (K01491,(K00300 K01500)) K01938	0.6666666666666666	FALSE	0.6666666666666666	FALSE	NA	No enzymes unique to module	NA	K01491,K01500,K01938	565,179,238	K01938 is present in multiple modules: M00377/M00140/M00618,K01491 is present in multiple modules: M00377/M00140/M00618,K01500 is present in multiple modules: M00377/M00140
M00121	M_TAG_MAG_00001_contigs	Heme biosynthesis, plants and bacteria, glutamate => heme	Pathway modules	Metabolism of cofactors and vitamins	Cofactor and vitamin metabolism	K01885 K02492 K01845 K01698 K01749 (K01719,K13542,K13543) K01599 (K00228,K02495) (K00230,K00231,K08973) K01772	0.2	FALSE	0.2	FALSE	1.0	K01885,K02495	1.2	K01885,K02495,K02495	1238,1041,23	None
M00122	M_TAG_MAG_00001_contigs	Cobalamin biosynthesis, cobyrinate a,c-diamide => cobalamin	Pathway modules	Metabolism of cofactors and vitamins	Cofactor and vitamin metabolism	(K00798,K19221) K02232 (K02225,K02227) K02231 K00768 (K02226,K22316) K02233	0.14285714285714285	FALSE	0.14285714285714285	FALSE	1.0	K02232	1	K02232	1091	None
M00117	M_TAG_MAG_00001_contigs	Ubiquinone biosynthesis, prokaryotes, chorismate (+ polyprenyl-PP) => ubiquinol	Pathway modules	Metabolism of cofactors and vitamins	Cofactor and vitamin metabolism	(K03181,K18240) K03179 (K03182+K03186) K18800 K00568 K03185 K03183 (K03184,K06134) K00568	0.2222222222222222	FALSE	0.2222222222222222	FALSE	1.0	K03179,K03182	1.1	K03179,K03182,K03186	259,258,260	K03186 is present in multiple modules: M00117/M00849
M00095	M_TAG_MAG_00001_contigs	C5 isoprenoid biosynthesis, mevalonate pathway	Pathway modules	Biosynthesis of terpenoids and polyketides	Terpenoid backbone biosynthesis	K00626 K01641 K00021 K00869 (K00938,K13273) K01597 K01823	0.14285714285714285	FALSE	0.14285714285714285	FALSE	NA	No enzymes unique to module	NA	K00626,K00626	124.269	K00626 is present in multiple modules: M00373/M00375/M00374/M00088/M00957/M00095/M00849
M00849	M_TAG_MAG_00001_contigs	C5 isoprenoid biosynthesis, mevalonate pathway, archaea	Pathway modules	Biosynthesis of terpenoids and polyketides	Terpenoid backbone biosynthesis	K00626 K01641 (K00021,K00054) ((K00869 (K17942,(K25517+K09128 K25518+K03186))),(K18689 K18690 K22813)) K06981 K01823	0.16666666666666666	FALSE	0.1875	FALSE	NA	No enzymes unique to module	NA	K00626,K00626,K03186	124,269,260	K00626 is present in multiple modules: M00373/M00375/M00374/M00088/M00957/M00095/M00849,K03186 is present in multiple modules: M00117/M00849
M00096	M_TAG_MAG_00001_contigs	C5 isoprenoid biosynthesis, non-mevalonate pathway	Pathway modules	Biosynthesis of terpenoids and polyketides	Terpenoid backbone biosynthesis	K01662 K00099 (K00991,K12506) K00919 (K01770,K12506) K03526 K03527 K01823	0.875	TRUE	0.875	TRUE	1.0	K00099,K00919,K00991,K01662,K01770,K03526,K03527	1,1,1,1,1,1,1	K00099,K00919,K00991,K01662,K01770,K03526,K03527	761,586,1455,413,661,745,58	None
M00039	M_TAG_MAG_00001_contigs	Monolignol biosynthesis, phenylalanine/tyrosine => monolignol	Pathway modules	Biosynthesis of other secondary metabolites	Biosynthesis of phytochemical compounds	(K10775,K13064) K00487 K01904 K13065 K09754 K00588 K09753 K09755 K13066 (K00083,K22395)	0.1	FALSE	0.1	FALSE	1.0	K00588	1	K00588	295	None
M00953	M_TAG_MAG_00001_contigs	Mugineic acid biosynthesis, methionine => 3-epihydroxymugineic acid	Pathway modules	Biosynthesis of other secondary metabolites	Biosynthesis of phytochemical compounds	K00789 K05953 K14271 K22374 K18054	0.2	FALSE	0.2	FALSE	NA	No enzymes unique to module	NA	K00789	731	K00789 is present in multiple modules: M00609/M00034/M00035/M00368/M00953
M00848	M_TAG_MAG_00001_contigs	Aurachin biosynthesis, anthranilate => aurachin A	Pathway modules	Biosynthesis of other secondary metabolites	Biosynthesis of other antibiotics	K09460 K02078+K14245+K14246+K22798 K22799 K22800 K21272 K21271 K22801 K22802	0.0	FALSE	0.03125	FALSE	1.0	K02078	2	K02078,K02078	355.377	No KOfam profile for K22799,No KOfam profile for K22801,No KOfam profile for K14245,No KOfam profile for K21271,No KOfam profile for K22798,No KOfam profile for K22800,No KOfam profile for K09460,No KOfam profile for K14246,No KOfam profile for K21272,No KOfam profile for K22802
M00876	M_TAG_MAG_00001_contigs	Staphyloferrin A biosynthesis, L-ornithine => staphyloferrin A	Pathway modules	Biosynthesis of other secondary metabolites	Biosynthesis of other bacterial compounds	K21898 K23446 K23447	0.3333333333333333	FALSE	0.3333333333333333	FALSE	1.0	K21898	1	K21898	167	None
M00651	M_TAG_MAG_00001_contigs	Vancomycin resistance, D-Ala-D-Lac type	Signature modules	Gene set	Drug resistance	(K18345 K18344 K07260 K18346),(K18351 K18352 K18354 K18353) (K18347 K15739 K08641)	0.0	FALSE	0.14285714285714285	FALSE	1.0	K18346	1	K18346	882	None
M00611	M_TAG_MAG_00001_contigs	Oxygenic photosynthesis in plants and cyanobacteria	Signature modules	Module set	Metabolic capacity	(M00161,M00163) M00165	0.0	FALSE	0.3181818181818182	FALSE	NA	No enzymes unique to module	NA	K00134,K00615,K00927,K01624,K01808	396,758,1168,899,635	K01808 is present in multiple modules: M00004/M00007/M00165/M00167/M00611/M00612,K00927 is present in multiple modules: M00001/M00002/M00003/M00308/M00552/M00165/M00166/M00611/M00612,K01624 is present in multiple modules: M00001/M00003/M00165/M00167/M00345/M00344/M00611/M00612,K00134 is present in multiple modules: M00001/M00002/M00003/M00308/M00552/M00165/M00166/M00611/M00612,K00615 is present i…
M00612	M_TAG_MAG_00001_contigs	Anoxygenic photosynthesis in purple bacteria	Signature modules	Module set	Metabolic capacity	M00597 M00165	0.0	FALSE	0.3181818181818182	FALSE	NA	No enzymes unique to module	NA	K00134,K00615,K00927,K01624,K01808	396,758,1168,899,635	K01808 is present in multiple modules: M00004/M00007/M00165/M00167/M00611/M00612,K00927 is present in multiple modules: M00001/M00002/M00003/M00308/M00552/M00165/M00166/M00611/M00612,K01624 is present in multiple modules: M00001/M00003/M00165/M00167/M00345/M00344/M00611/M00612,K00134 is present in multiple modules: M00001/M00002/M00003/M00308/M00552/M00165/M00166/M00611/M00612,K00615 is present i…
M00613	M_TAG_MAG_00001_contigs	Anoxygenic photosynthesis in green nonsulfur bacteria	Signature modules	Module set	Metabolic capacity	M00597 M00376	0.0	FALSE	0.038461538461538464	FALSE	NA	No enzymes unique to module	NA	K01677,K01678,K01961,K01962,K01963,K02160	1129,1128,358,356,357,360	K01963 is present in multiple modules: M00376/M00082/M00613,K01962 is present in multiple modules: M00376/M00082/M00613,K01961 is present in multiple modules: M00376/M00082/M00613,K02160 is present in multiple modules: M00376/M00082/M00613,K01678 is present in multiple modules: M00009/M00011/M00173/M00374/M00620/M00613/M00614,K01677 is present in multiple modules: M00009/M00011/M00173/M00374/M006…
M00614	M_TAG_MAG_00001_contigs	Anoxygenic photosynthesis in green sulfur bacteria	Signature modules	Module set	Metabolic capacity	M00598 M00173	0.0	FALSE	0.18181818181818182	FALSE	NA	No enzymes unique to module	NA	K00174,K00175,K00176,K00177,K01006,K01677,K01678,K03737	1123,1124,1122,1125,43,1129,1128,743	K00174 is present in multiple modules: M00009/M00011/M00173/M00620/M00614,K01006 is present in multiple modules: M00169/M00172/M00171/M00173/M00614,K00176 is present in multiple modules: M00009/M00011/M00173/M00620/M00614,K00175 is present in multiple modules: M00009/M00011/M00173/M00620/M00614,K03737 is present in multiple modules: M00307/M00173/M00614,K01678 is present in multiple modules: M000…
M00617	M_TAG_MAG_00001_contigs	Methanogen	Signature modules	Module set	Metabolic capacity	M00567,M00357,M00356,M00563	0.0	FALSE	0.3333333333333333	FALSE	NA	No enzymes unique to module	NA	K00625,K00925	1166.12	K00925 is present in multiple modules: M00579/M00357/M00617/M00618,K00625 is present in multiple modules: M00579/M00357/M00617/M00618
M00618	M_TAG_MAG_00001_contigs	Acetogen	Signature modules	Module set	Metabolic capacity	M00377 M00579	0.5	FALSE	0.6428571428571428	FALSE	NA	No enzymes unique to module	NA	K00625,K00925,K01491,K01938,K15024	1166,1165,565,238,278	K01938 is present in multiple modules: M00377/M00140/M00618,K15024 is present in multiple modules: M00579/M00618,K00625 is present in multiple modules: M00579/M00357/M00617/M00618,K00925 is present in multiple modules: M00579/M00357/M00617/M00618,K01491 is present in multiple modules: M00377/M00140/M00618
M00616	M_TAG_MAG_00001_contigs	Sulfate-sulfur assimilation	Signature modules	Module set	Metabolic capacity	(K02048,K23163)+K02046+K02047+K02045 M00176	0.0	FALSE	0.16666666666666666	FALSE	NA	No enzymes unique to module	NA	K00390	907	K00390 is present in multiple modules: M00176/M00616

## Sheet: Supplementary Table 9
M_SnakePit_MAG_00001_prokka
locus_tag	ftype	length_bp	gene	EC_number	COG	product
AIPAKLKF_00001	gene	180
AIPAKLKF_00001	CDS	180				hypothetical protein
AIPAKLKF_00002	gene	1422	mleN_1
AIPAKLKF_00002	CDS	1422	mleN_1		COG1757	Malate-2H(+)/Na(+)-lactate antiporter
AIPAKLKF_00003	gene	1290	lysA
AIPAKLKF_00003	CDS	1290	lysA	4.1.1.20	COG0019	Diaminopimelate decarboxylase
AIPAKLKF_00004	gene	840	dapF
AIPAKLKF_00004	CDS	840	dapF	5.1.1.7	COG0253	Diaminopimelate epimerase
AIPAKLKF_00005	gene	1023	nadR
AIPAKLKF_00005	CDS	1023	nadR		COG1056	Trifunctional NAD biosynthesis/regulator protein NadR
AIPAKLKF_00006	gene	771	pnuC
AIPAKLKF_00006	CDS	771	pnuC		COG3201	Nicotinamide riboside transporter PnuC
AIPAKLKF_00007	gene	738	cmoM
AIPAKLKF_00007	CDS	738	cmoM	2.1.1.-		tRNA 5-carboxymethoxyuridine methyltransferase
AIPAKLKF_00008	gene	879	hslO
AIPAKLKF_00008	CDS	879	hslO		COG1281	33 kDa chaperonin
AIPAKLKF_00009	gene	1128	cshC
AIPAKLKF_00009	CDS	1128	cshC	3.6.4.13	COG0513	DEAD-box ATP-dependent RNA helicase CshC
AIPAKLKF_00010	gene	693	cwlD
AIPAKLKF_00010	CDS	693	cwlD	3.5.1.28	COG0860	Germination-specific N-acetylmuramoyl-L-alanine amidase
AIPAKLKF_00011	gene	1146	recA
AIPAKLKF_00011	CDS	1146	recA			Protein RecA
AIPAKLKF_00012	gene	540	pgsA
AIPAKLKF_00012	CDS	540	pgsA	2.7.8.5		CDP-diacylglycerol--glycerol-3-phosphate 3-phosphatidyltransferase
AIPAKLKF_00013	gene	1353	rimO
AIPAKLKF_00013	CDS	1353	rimO	2.8.4.4	COG0621	Ribosomal protein S12 methylthiotransferase RimO
AIPAKLKF_00014	gene	846	folD
AIPAKLKF_00014	CDS	846	folD		COG0190	Bifunctional protein FolD protein
AIPAKLKF_00015	gene	3066
AIPAKLKF_00015	CDS	3066				hypothetical protein
AIPAKLKF_00016	gene	1179	fieF
AIPAKLKF_00016	CDS	1179	fieF			Ferrous-iron efflux pump FieF
AIPAKLKF_00017	gene	405
AIPAKLKF_00017	CDS	405				hypothetical protein
AIPAKLKF_00018	gene	71
AIPAKLKF_00018	tRNA	71				tRNA-Cys(gca)
AIPAKLKF_00019	gene	822
AIPAKLKF_00019	CDS	822				hypothetical protein
AIPAKLKF_00020	gene	429	rlmH
AIPAKLKF_00020	CDS	429	rlmH	2.1.1.177	COG1576	Ribosomal RNA large subunit methyltransferase H
AIPAKLKF_00021	gene	1128
AIPAKLKF_00021	CDS	1128				hypothetical protein
AIPAKLKF_00022	gene	1536	gsiB_1
AIPAKLKF_00022	CDS	1536	gsiB_1		COG0747	Glutathione-binding protein GsiB
AIPAKLKF_00023	gene	1539	gsiB_2
AIPAKLKF_00023	CDS	1539	gsiB_2		COG0747	Glutathione-binding protein GsiB
AIPAKLKF_00024	gene	1554	hbpA
AIPAKLKF_00024	CDS	1554	hbpA		COG0747	Heme-binding protein A
AIPAKLKF_00025	gene	969	gsiC
AIPAKLKF_00025	CDS	969	gsiC		COG0601	Glutathione transport system permease protein GsiC
AIPAKLKF_00026	gene	927	gsiD
AIPAKLKF_00026	CDS	927	gsiD		COG1173	Glutathione transport system permease protein GsiD
AIPAKLKF_00027	gene	1014	oppD_1
AIPAKLKF_00027	CDS	1014	oppD_1		COG0444	Oligopeptide transport ATP-binding protein OppD
AIPAKLKF_00028	gene	969	oppF_1
AIPAKLKF_00028	CDS	969	oppF_1		COG4608	Oligopeptide transport ATP-binding protein OppF
AIPAKLKF_00029	gene	429
AIPAKLKF_00029	CDS	429				hypothetical protein
AIPAKLKF_00030	gene	1899
AIPAKLKF_00030	CDS	1899				hypothetical protein
AIPAKLKF_00031	gene	513	thiT
AIPAKLKF_00031	CDS	513	thiT		COG3859	Thiamine transporter ThiT
AIPAKLKF_00032	gene	159
AIPAKLKF_00032	CDS	159				hypothetical protein
AIPAKLKF_00033	gene	246
AIPAKLKF_00033	CDS	246				hypothetical protein
AIPAKLKF_00034	gene	1542
AIPAKLKF_00034	CDS	1542			COG1292	Glycine betaine/proline/choline/ectoine transporter
AIPAKLKF_00035	gene	873	ispE
AIPAKLKF_00035	CDS	873	ispE	2.7.1.148	COG1947	4-diphosphocytidyl-2-C-methyl-D-erythritol kinase
AIPAKLKF_00036	gene	1908
AIPAKLKF_00036	CDS	1908				hypothetical protein
AIPAKLKF_00037	gene	1533
AIPAKLKF_00037	CDS	1533				hypothetical protein
AIPAKLKF_00038	gene	687	walR_1
AIPAKLKF_00038	CDS	687	walR_1		COG0745	Transcriptional regulatory protein WalR
AIPAKLKF_00039	gene	1767	walK
AIPAKLKF_00039	CDS	1767	walK	2.7.13.3		Sensor histidine kinase WalK
AIPAKLKF_00040	gene	1242
AIPAKLKF_00040	CDS	1242				hypothetical protein
AIPAKLKF_00041	gene	873
AIPAKLKF_00041	CDS	873				hypothetical protein
AIPAKLKF_00042	gene	1263	murAB
AIPAKLKF_00042	CDS	1263	murAB	2.5.1.7	COG0766	UDP-N-acetylglucosamine 1-carboxyvinyltransferase 2
AIPAKLKF_00043	gene	816	yycJ
AIPAKLKF_00043	CDS	816	yycJ	3.-.-.-	COG1235	Putative metallo-hydrolase YycJ
AIPAKLKF_00044	gene	216
AIPAKLKF_00044	CDS	216				hypothetical protein
AIPAKLKF_00045	gene	189
AIPAKLKF_00045	CDS	189				hypothetical protein
AIPAKLKF_00046	gene	222
AIPAKLKF_00046	CDS	222				hypothetical protein
AIPAKLKF_00047	gene	189
AIPAKLKF_00047	CDS	189				hypothetical protein
AIPAKLKF_00048	gene	378	fliS
AIPAKLKF_00048	CDS	378	fliS		COG1516	Flagellar secretion chaperone FliS
AIPAKLKF_00049	gene	405
AIPAKLKF_00049	CDS	405				hypothetical protein
AIPAKLKF_00050	gene	396
AIPAKLKF_00050	CDS	396				hypothetical protein
AIPAKLKF_00051	gene	2385
AIPAKLKF_00051	CDS	2385				hypothetical protein
AIPAKLKF_00052	gene	441
AIPAKLKF_00052	CDS	441				hypothetical protein
AIPAKLKF_00053	gene	627	recX
AIPAKLKF_00053	CDS	627	recX			Regulatory protein RecX
AIPAKLKF_00054	gene	2247	recD2
AIPAKLKF_00054	CDS	2247	recD2	3.6.4.12	COG0507	ATP-dependent RecD-like DNA helicase
AIPAKLKF_00055	gene	741	prs_1
AIPAKLKF_00055	CDS	741	prs_1			Putative ribose-phosphate pyrophosphokinase
AIPAKLKF_00056	gene	273
AIPAKLKF_00056	CDS	273				hypothetical protein
AIPAKLKF_00057	gene	504
AIPAKLKF_00057	CDS	504				hypothetical protein
AIPAKLKF_00058	gene	1701
AIPAKLKF_00058	CDS	1701				hypothetical protein
AIPAKLKF_00059	gene	1647	flgK
AIPAKLKF_00059	CDS	1647	flgK		COG1256	Flagellar hook-associated protein 1
AIPAKLKF_00060	gene	1398
AIPAKLKF_00060	CDS	1398				hypothetical protein
AIPAKLKF_00061	gene	432	fliW
AIPAKLKF_00061	CDS	432	fliW		COG1699	Flagellar assembly factor FliW
AIPAKLKF_00062	gene	210	csrA
AIPAKLKF_00062	CDS	210	csrA		COG1551	Translational regulator CsrA
AIPAKLKF_00063	gene	612
AIPAKLKF_00063	CDS	612				hypothetical protein
AIPAKLKF_00064	gene	396
AIPAKLKF_00064	CDS	396				hypothetical protein
AIPAKLKF_00065	gene	714	ycdX
AIPAKLKF_00065	CDS	714	ycdX	3.1.3.-	COG1387	putative phosphatase YcdX
AIPAKLKF_00066	gene	2220	pcrA
AIPAKLKF_00066	CDS	2220	pcrA	3.6.4.12		ATP-dependent DNA helicase PcrA
AIPAKLKF_00067	gene	912	cntI
AIPAKLKF_00067	CDS	912	cntI			Pseudopaline exporter CntI
AIPAKLKF_00068	gene	1101	prfA
AIPAKLKF_00068	CDS	1101	prfA		COG0216	Peptide chain release factor 1
AIPAKLKF_00069	gene	867	prmC
AIPAKLKF_00069	CDS	867	prmC	2.1.1.297	COG2890	Release factor glutamine methyltransferase
AIPAKLKF_00070	gene	903
AIPAKLKF_00070	CDS	903				hypothetical protein
AIPAKLKF_00071	gene	204	rpmE
AIPAKLKF_00071	CDS	204	rpmE		COG0254	50S ribosomal protein L31
AIPAKLKF_00072	gene	1287	rho
AIPAKLKF_00072	CDS	1287	rho	3.6.4.-	COG1158	Transcription termination factor Rho
AIPAKLKF_00073	gene	1071
AIPAKLKF_00073	CDS	1071				hypothetical protein
AIPAKLKF_00074	gene	657	mecA
AIPAKLKF_00074	CDS	657	mecA			Adapter protein MecA
AIPAKLKF_00075	gene	819
AIPAKLKF_00075	CDS	819				hypothetical protein
AIPAKLKF_00076	gene	942
AIPAKLKF_00076	CDS	942				hypothetical protein
AIPAKLKF_00077	gene	633
AIPAKLKF_00077	CDS	633				hypothetical protein
AIPAKLKF_00078	gene	324
AIPAKLKF_00078	CDS	324				hypothetical protein
AIPAKLKF_00079	gene	1278	hflX
AIPAKLKF_00079	CDS	1278	hflX		COG2262	GTPase HflX
AIPAKLKF_00080	gene	168
AIPAKLKF_00080	CDS	168				hypothetical protein
AIPAKLKF_00081	gene	966	tagO
AIPAKLKF_00081	CDS	966	tagO	2.7.8.33	COG0472	putative undecaprenyl-phosphate N-acetylglucosaminyl 1-phosphate transferase
AIPAKLKF_00082	gene	627	upp
AIPAKLKF_00082	CDS	627	upp	2.4.2.9		Uracil phosphoribosyltransferase
AIPAKLKF_00083	gene	429	ywlF
AIPAKLKF_00083	CDS	429	ywlF	5.3.1.-	COG0698	Putative sugar phosphate isomerase YwlF
AIPAKLKF_00084	gene	1005	ywlC
AIPAKLKF_00084	CDS	1005	ywlC	2.7.7.87	COG0009	Threonylcarbamoyl-AMP synthase
AIPAKLKF_00085	gene	498
AIPAKLKF_00085	CDS	498				hypothetical protein
AIPAKLKF_00086	gene	234
AIPAKLKF_00086	CDS	234				hypothetical protein
AIPAKLKF_00087	gene	393
AIPAKLKF_00087	CDS	393				hypothetical protein
AIPAKLKF_00088	gene	681	atpB
AIPAKLKF_00088	CDS	681	atpB		COG0356	ATP synthase subunit a
AIPAKLKF_00089	gene	282	atpE
AIPAKLKF_00089	CDS	282	atpE			ATP synthase subunit c, sodium ion specific
AIPAKLKF_00090	gene	516	atpF
AIPAKLKF_00090	CDS	516	atpF			ATP synthase subunit b, sodium ion specific
AIPAKLKF_00091	gene	561	atpH
AIPAKLKF_00091	CDS	561	atpH		COG0712	ATP synthase subunit delta
AIPAKLKF_00092	gene	1506	atpA
AIPAKLKF_00092	CDS	1506	atpA	7.1.2.2	COG0056	ATP synthase subunit alpha
AIPAKLKF_00093	gene	858	atpG
AIPAKLKF_00093	CDS	858	atpG		COG0224	ATP synthase gamma chain, sodium ion specific
AIPAKLKF_00094	gene	1401	atpD
AIPAKLKF_00094	CDS	1401	atpD	7.1.2.2	COG0055	ATP synthase subunit beta
AIPAKLKF_00095	gene	399	atpC
AIPAKLKF_00095	CDS	399	atpC		COG0355	ATP synthase epsilon chain
AIPAKLKF_00096	gene	384
AIPAKLKF_00096	CDS	384				hypothetical protein
AIPAKLKF_00097	gene	525	sipP
AIPAKLKF_00097	CDS	525	sipP	3.4.21.89		Signal peptidase I P
AIPAKLKF_00098	gene	204
AIPAKLKF_00098	CDS	204				hypothetical protein
AIPAKLKF_00099	gene	1824	typA
AIPAKLKF_00099	CDS	1824	typA		COG1217	GTP-binding protein TypA/BipA
AIPAKLKF_00100	gene	1599	murJ_1
AIPAKLKF_00100	CDS	1599	murJ_1		COG2244	Lipid II flippase MurJ
AIPAKLKF_00101	gene	615
AIPAKLKF_00101	CDS	615				hypothetical protein
AIPAKLKF_00102	gene	1431	proS
AIPAKLKF_00102	CDS	1431	proS	6.1.1.15	COG0442	Proline--tRNA ligase
AIPAKLKF_00103	gene	798
AIPAKLKF_00103	CDS	798				hypothetical protein
AIPAKLKF_00104	gene	1059	ddlA
AIPAKLKF_00104	CDS	1059	ddlA	6.3.2.4	COG1181	D-alanine--D-alanine ligase A
AIPAKLKF_00105	gene	786	murI
AIPAKLKF_00105	CDS	786	murI	5.1.1.3	COG0796	Glutamate racemase
AIPAKLKF_00106	gene	258
AIPAKLKF_00106	CDS	258				hypothetical protein
AIPAKLKF_00107	gene	3015
AIPAKLKF_00107	CDS	3015				hypothetical protein
AIPAKLKF_00108	gene	489	ispF
AIPAKLKF_00108	CDS	489	ispF	4.6.1.12	COG0245	2-C-methyl-D-erythritol 2,4-cyclodiphosphate synthase
AIPAKLKF_00109	gene	1410	cysS
AIPAKLKF_00109	CDS	1410	cysS	6.1.1.16	COG0215	Cysteine--tRNA ligase
AIPAKLKF_00110	gene	414	mrnC
AIPAKLKF_00110	CDS	414	mrnC	3.1.26.-	COG1939	Mini-ribonuclease 3
AIPAKLKF_00111	gene	948	rlmB_1
AIPAKLKF_00111	CDS	948	rlmB_1	2.1.1.185		23S rRNA (guanosine-2'-O-)-methyltransferase RlmB
AIPAKLKF_00112	gene	525
AIPAKLKF_00112	CDS	525				hypothetical protein
AIPAKLKF_00113	gene	606	sigH
AIPAKLKF_00113	CDS	606	sigH		COG1595	RNA polymerase sigma-H factor
AIPAKLKF_00114	gene	699
AIPAKLKF_00114	CDS	699				hypothetical protein
AIPAKLKF_00115	gene	342	ndoA
AIPAKLKF_00115	CDS	342	ndoA	3.1.27.-	COG2337	Endoribonuclease EndoA
AIPAKLKF_00116	gene	531
AIPAKLKF_00116	CDS	531				hypothetical protein
AIPAKLKF_00117	gene	732
AIPAKLKF_00117	CDS	732				hypothetical protein
AIPAKLKF_00118	gene	792	thyA1
AIPAKLKF_00118	CDS	792	thyA1	2.1.1.45	COG0207	Thymidylate synthase 1
AIPAKLKF_00119	gene	405
AIPAKLKF_00119	CDS	405				hypothetical protein
AIPAKLKF_00120	gene	1422
AIPAKLKF_00120	CDS	1422				hypothetical protein
AIPAKLKF_00121	gene	1380	pdtaS
AIPAKLKF_00121	CDS	1380	pdtaS	2.7.13.3	COG3920	putative sensor histidine kinase pdtaS
AIPAKLKF_00122	gene	579	pdtaR
AIPAKLKF_00122	CDS	579	pdtaR		COG3707	putative transcriptional regulatory protein pdtaR
AIPAKLKF_00123	gene	417	pduV
AIPAKLKF_00123	CDS	417	pduV		COG4917	Propanediol utilization protein PduV
AIPAKLKF_00124	gene	345	pduU
AIPAKLKF_00124	CDS	345	pduU		COG4810	Propanediol utilization protein PduU
AIPAKLKF_00125	gene	1350
AIPAKLKF_00125	CDS	1350				hypothetical protein
AIPAKLKF_00126	gene	1251
AIPAKLKF_00126	CDS	1251				hypothetical protein
AIPAKLKF_00127	gene	705	trmR
AIPAKLKF_00127	CDS	705	trmR	2.1.1.-	COG4122	tRNA 5-hydroxyuridine methyltransferase
AIPAKLKF_00128	gene	1065	mltG
AIPAKLKF_00128	CDS	1065	mltG	4.2.2.-		Endolytic murein transglycosylase
AIPAKLKF_00129	gene	1173	xylH
AIPAKLKF_00129	CDS	1173	xylH		COG4214	Xylose transport system permease protein XylH
AIPAKLKF_00130	gene	1515	xylG
AIPAKLKF_00130	CDS	1515	xylG	7.5.2.10	COG1129	Xylose import ATP-binding protein XylG
AIPAKLKF_00131	gene	1116	chvE
AIPAKLKF_00131	CDS	1116	chvE		COG4213	Multiple sugar-binding periplasmic receptor ChvE
AIPAKLKF_00132	gene	153
AIPAKLKF_00132	CDS	153				hypothetical protein
AIPAKLKF_00133	gene	735	gatD
AIPAKLKF_00133	CDS	735	gatD	6.3.5.13	COG3442	Lipid II isoglutaminyl synthase (glutamine-hydrolyzing) subunit GatD
AIPAKLKF_00134	gene	1338	murT
AIPAKLKF_00134	CDS	1338	murT	6.3.5.13	COG0769	Lipid II isoglutaminyl synthase (glutamine-hydrolyzing) subunit MurT
AIPAKLKF_00135	gene	1374	yeeO
AIPAKLKF_00135	CDS	1374	yeeO		COG0534	putative FMN/FAD exporter YeeO
AIPAKLKF_00136	gene	1377	mdtK
AIPAKLKF_00136	CDS	1377	mdtK			Multidrug resistance protein MdtK
AIPAKLKF_00137	gene	71
AIPAKLKF_00137	tRNA	71				tRNA-Gly(tcc)
AIPAKLKF_00138	gene	576
AIPAKLKF_00138	CDS	576				hypothetical protein
AIPAKLKF_00139	gene	672
AIPAKLKF_00139	CDS	672				hypothetical protein
AIPAKLKF_00140	gene	558
AIPAKLKF_00140	CDS	558				hypothetical protein
AIPAKLKF_00141	gene	588	spoIIIAF
AIPAKLKF_00141	CDS	588	spoIIIAF			Stage III sporulation protein AF
AIPAKLKF_00142	gene	1137	spoIIIAE
AIPAKLKF_00142	CDS	1137	spoIIIAE			Stage III sporulation protein AE
AIPAKLKF_00143	gene	384
AIPAKLKF_00143	CDS	384				hypothetical protein
AIPAKLKF_00144	gene	195
AIPAKLKF_00144	CDS	195				hypothetical protein
AIPAKLKF_00145	gene	513
AIPAKLKF_00145	CDS	513				hypothetical protein
AIPAKLKF_00146	gene	924
AIPAKLKF_00146	CDS	924				hypothetical protein
AIPAKLKF_00147	gene	1263	murAA
AIPAKLKF_00147	CDS	1263	murAA	2.5.1.7	COG0766	UDP-N-acetylglucosamine 1-carboxyvinyltransferase 1
AIPAKLKF_00148	gene	807	moaA_1
AIPAKLKF_00148	CDS	807	moaA_1			GTP 3',8-cyclase
AIPAKLKF_00149	gene	1116
AIPAKLKF_00149	CDS	1116				hypothetical protein
AIPAKLKF_00150	gene	462
AIPAKLKF_00150	CDS	462				hypothetical protein
AIPAKLKF_00151	gene	1119
AIPAKLKF_00151	CDS	1119				hypothetical protein
AIPAKLKF_00152	gene	678
AIPAKLKF_00152	CDS	678				Single-stranded DNA-binding protein
AIPAKLKF_00153	gene	456
AIPAKLKF_00153	CDS	456				hypothetical protein
AIPAKLKF_00154	gene	435
AIPAKLKF_00154	CDS	435				hypothetical protein
AIPAKLKF_00155	gene	414
AIPAKLKF_00155	CDS	414				hypothetical protein
AIPAKLKF_00156	gene	282
AIPAKLKF_00156	CDS	282				hypothetical protein
AIPAKLKF_00157	gene	1581
AIPAKLKF_00157	CDS	1581				hypothetical protein
AIPAKLKF_00158	gene	738	fliA
AIPAKLKF_00158	CDS	738	fliA		COG1191	RNA polymerase sigma factor FliA
AIPAKLKF_00159	gene	294
AIPAKLKF_00159	CDS	294				hypothetical protein
AIPAKLKF_00160	gene	891
AIPAKLKF_00160	CDS	891				hypothetical protein
AIPAKLKF_00161	gene	879	ylxH
AIPAKLKF_00161	CDS	879	ylxH		COG0455	Flagellum site-determining protein YlxH
AIPAKLKF_00162	gene	1224	flhF
AIPAKLKF_00162	CDS	1224	flhF		COG1419	Flagellar biosynthesis protein FlhF
AIPAKLKF_00163	gene	2043	flhA
AIPAKLKF_00163	CDS	2043	flhA		COG1298	Flagellar biosynthesis protein FlhA
AIPAKLKF_00164	gene	1119	flhB_1
AIPAKLKF_00164	CDS	1119	flhB_1		COG1377	Flagellar biosynthetic protein FlhB
AIPAKLKF_00165	gene	807	fliR
AIPAKLKF_00165	CDS	807	fliR		COG1684	Flagellar biosynthetic protein FliR
AIPAKLKF_00166	gene	279
AIPAKLKF_00166	CDS	279				hypothetical protein
AIPAKLKF_00167	gene	738	fliP
AIPAKLKF_00167	CDS	738	fliP		COG1338	Flagellar biosynthetic protein FliP
AIPAKLKF_00168	gene	414
AIPAKLKF_00168	CDS	414				hypothetical protein
AIPAKLKF_00169	gene	366	cheY
AIPAKLKF_00169	CDS	366	cheY		COG0784	Chemotaxis protein CheY
AIPAKLKF_00170	gene	1149
AIPAKLKF_00170	CDS	1149				hypothetical protein
AIPAKLKF_00171	gene	987	fliM
AIPAKLKF_00171	CDS	987	fliM		COG1868	Flagellar motor switch protein FliM
AIPAKLKF_00172	gene	492
AIPAKLKF_00172	CDS	492				hypothetical protein
AIPAKLKF_00173	gene	504
AIPAKLKF_00173	CDS	504				hypothetical protein
AIPAKLKF_00174	gene	744	motB
AIPAKLKF_00174	CDS	744	motB		COG1360	Motility protein B
AIPAKLKF_00175	gene	795	pomA
AIPAKLKF_00175	CDS	795	pomA		COG1291	Chemotaxis protein PomA
AIPAKLKF_00176	gene	183
AIPAKLKF_00176	CDS	183				hypothetical protein
AIPAKLKF_00177	gene	1356	flgE
AIPAKLKF_00177	CDS	1356	flgE		COG1749	Flagellar hook protein FlgE
AIPAKLKF_00178	gene	372
AIPAKLKF_00178	CDS	372				hypothetical protein
AIPAKLKF_00179	gene	972
AIPAKLKF_00179	CDS	972				hypothetical protein
AIPAKLKF_00180	gene	1296
AIPAKLKF_00180	CDS	1296				hypothetical protein
AIPAKLKF_00181	gene	783
AIPAKLKF_00181	CDS	783				hypothetical protein
AIPAKLKF_00182	gene	444
AIPAKLKF_00182	CDS	444				hypothetical protein
AIPAKLKF_00183	gene	1314	yscN
AIPAKLKF_00183	CDS	1314	yscN	7.1.2.2		putative ATP synthase YscN
AIPAKLKF_00184	gene	777
AIPAKLKF_00184	CDS	777				hypothetical protein
AIPAKLKF_00185	gene	1014	fliG
AIPAKLKF_00185	CDS	1014	fliG		COG1536	Flagellar motor switch protein FliG
AIPAKLKF_00186	gene	1599
AIPAKLKF_00186	CDS	1599				hypothetical protein
AIPAKLKF_00187	gene	321	fliE
AIPAKLKF_00187	CDS	321	fliE			Flagellar hook-basal body complex protein FliE
AIPAKLKF_00188	gene	447	flgC
AIPAKLKF_00188	CDS	447	flgC		COG1558	Flagellar basal-body rod protein FlgC
AIPAKLKF_00189	gene	366	flgB
AIPAKLKF_00189	CDS	366	flgB		COG1815	Flagellar basal body rod protein FlgB
AIPAKLKF_00190	gene	1086
AIPAKLKF_00190	CDS	1086				hypothetical protein
AIPAKLKF_00191	gene	1329
AIPAKLKF_00191	CDS	1329				hypothetical protein
AIPAKLKF_00192	gene	1380
AIPAKLKF_00192	CDS	1380				hypothetical protein
AIPAKLKF_00193	gene	126
AIPAKLKF_00193	CDS	126				hypothetical protein
AIPAKLKF_00194	gene	363
AIPAKLKF_00194	CDS	363				hypothetical protein
AIPAKLKF_00195	gene	1257
AIPAKLKF_00195	CDS	1257		1.18.1.2		Ferredoxin--NADP reductase
AIPAKLKF_00196	gene	1449	lhgD_1
AIPAKLKF_00196	CDS	1449	lhgD_1	1.1.5.-		L-2-hydroxyglutarate dehydrogenase
AIPAKLKF_00197	gene	1146
AIPAKLKF_00197	CDS	1146				hypothetical protein
AIPAKLKF_00198	gene	1497	glpK_1
AIPAKLKF_00198	CDS	1497	glpK_1	2.7.1.30	COG0554	Glycerol kinase
AIPAKLKF_00199	gene	1368
AIPAKLKF_00199	CDS	1368				hypothetical protein
AIPAKLKF_00200	gene	411	cymR
AIPAKLKF_00200	CDS	411	cymR			HTH-type transcriptional regulator CymR
AIPAKLKF_00201	gene	1182	iscS_1
AIPAKLKF_00201	CDS	1182	iscS_1	2.8.1.7		Cysteine desulfurase IscS
AIPAKLKF_00202	gene	432	iscU
AIPAKLKF_00202	CDS	432	iscU		COG0822	Iron-sulfur cluster assembly scaffold protein IscU
AIPAKLKF_00203	gene	1197	sbcD
AIPAKLKF_00203	CDS	1197	sbcD			Nuclease SbcCD subunit D
AIPAKLKF_00204	gene	3366
AIPAKLKF_00204	CDS	3366				hypothetical protein
AIPAKLKF_00205	gene	1317
AIPAKLKF_00205	CDS	1317				hypothetical protein
AIPAKLKF_00206	gene	72
AIPAKLKF_00206	tRNA	72				tRNA-Asn(gtt)
AIPAKLKF_00207	gene	73
AIPAKLKF_00207	tRNA	73				tRNA-Glu(ttc)
AIPAKLKF_00208	gene	96
AIPAKLKF_00208	rRNA	96				5S ribosomal RNA
AIPAKLKF_00209	gene	77
AIPAKLKF_00209	tRNA	77				tRNA-Pro(tgg)
AIPAKLKF_00210	gene	76
AIPAKLKF_00210	tRNA	76				tRNA-Arg(tct)
AIPAKLKF_00211	gene	73
AIPAKLKF_00211	tRNA	73				tRNA-His(gtg)
AIPAKLKF_00212	gene	73
AIPAKLKF_00212	tRNA	73				tRNA-Lys(ttt)
AIPAKLKF_00213	gene	73
AIPAKLKF_00213	tRNA	73				tRNA-Lys(ttt)
AIPAKLKF_00214	gene	2466
AIPAKLKF_00214	CDS	2466				hypothetical protein
AIPAKLKF_00215	gene	339	spoIIAA
AIPAKLKF_00215	CDS	339	spoIIAA		COG1366	Anti-sigma F factor antagonist
AIPAKLKF_00216	gene	432	spoIIAB
AIPAKLKF_00216	CDS	432	spoIIAB	2.7.11.1	COG2172	Anti-sigma F factor
AIPAKLKF_00217	gene	720	sigF
AIPAKLKF_00217	CDS	720	sigF		COG1191	RNA polymerase sigma-F factor
AIPAKLKF_00218	gene	399
AIPAKLKF_00218	CDS	399				hypothetical protein
AIPAKLKF_00219	gene	1710	cdr_1
AIPAKLKF_00219	CDS	1710	cdr_1	1.8.1.14		Coenzyme A disulfide reductase
AIPAKLKF_00220	gene	1317
AIPAKLKF_00220	CDS	1317				hypothetical protein
AIPAKLKF_00221	gene	885
AIPAKLKF_00221	CDS	885				hypothetical protein
AIPAKLKF_00222	gene	1728	gdpP
AIPAKLKF_00222	CDS	1728	gdpP	3.1.4.59	COG3887	Cyclic-di-AMP phosphodiesterase GdpP
AIPAKLKF_00223	gene	450	rplI
AIPAKLKF_00223	CDS	450	rplI			50S ribosomal protein L9
AIPAKLKF_00224	gene	1329	dnaC
AIPAKLKF_00224	CDS	1329	dnaC	3.6.4.12	COG0305	Replicative DNA helicase
AIPAKLKF_00225	gene	231
AIPAKLKF_00225	CDS	231				hypothetical protein
AIPAKLKF_00226	gene	1887	yheS
AIPAKLKF_00226	CDS	1887	yheS		COG0488	putative ABC transporter ATP-binding protein YheS
AIPAKLKF_00227	gene	636	rex1
AIPAKLKF_00227	CDS	636	rex1		COG2344	Redox-sensing transcriptional repressor Rex 1
AIPAKLKF_00228	gene	1452
AIPAKLKF_00228	CDS	1452				hypothetical protein
AIPAKLKF_00229	gene	264
AIPAKLKF_00229	CDS	264				hypothetical protein
AIPAKLKF_00230	gene	279
AIPAKLKF_00230	CDS	279				hypothetical protein
AIPAKLKF_00231	gene	579	spmA
AIPAKLKF_00231	CDS	579	spmA		COG2715	Spore maturation protein A
AIPAKLKF_00232	gene	534	spmB
AIPAKLKF_00232	CDS	534	spmB			Spore maturation protein B
AIPAKLKF_00233	gene	1182
AIPAKLKF_00233	CDS	1182				hypothetical protein
AIPAKLKF_00234	gene	1395
AIPAKLKF_00234	CDS	1395				hypothetical protein
AIPAKLKF_00235	gene	1431	purB
AIPAKLKF_00235	CDS	1431	purB	4.3.2.2		Adenylosuccinate lyase
AIPAKLKF_00236	gene	1278	purA
AIPAKLKF_00236	CDS	1278	purA	6.3.4.4	COG0104	Adenylosuccinate synthetase
AIPAKLKF_00237	gene	1302
AIPAKLKF_00237	CDS	1302				hypothetical protein
AIPAKLKF_00238	gene	1326
AIPAKLKF_00238	CDS	1326				hypothetical protein
AIPAKLKF_00239	gene	2157
AIPAKLKF_00239	CDS	2157				hypothetical protein
AIPAKLKF_00240	gene	1809	lepA
AIPAKLKF_00240	CDS	1809	lepA	3.6.5.-		Elongation factor 4
AIPAKLKF_00241	gene	1119	hemW
AIPAKLKF_00241	CDS	1119	hemW		COG0635	Heme chaperone HemW
AIPAKLKF_00242	gene	657	rluC_1
AIPAKLKF_00242	CDS	657	rluC_1	5.4.99.24	COG0564	Ribosomal large subunit pseudouridine synthase C
AIPAKLKF_00243	gene	762	rnhB
AIPAKLKF_00243	CDS	762	rnhB	3.1.26.4	COG0164	Ribonuclease HII
AIPAKLKF_00244	gene	270	flhB_2
AIPAKLKF_00244	CDS	270	flhB_2		COG1377	Flagellar biosynthetic protein FlhB
AIPAKLKF_00245	gene	351
AIPAKLKF_00245	CDS	351				hypothetical protein
AIPAKLKF_00246	gene	1323	der
AIPAKLKF_00246	CDS	1323	der			GTPase Der
AIPAKLKF_00247	gene	624	plsY
AIPAKLKF_00247	CDS	624	plsY	2.3.1.275	COG0344	Glycerol-3-phosphate acyltransferase
AIPAKLKF_00248	gene	993	gpsA
AIPAKLKF_00248	CDS	993	gpsA	1.1.1.94		Glycerol-3-phosphate dehydrogenase [NAD(P)+]
AIPAKLKF_00249	gene	1284	adeQ
AIPAKLKF_00249	CDS	1284	adeQ		COG2252	Adenine permease AdeQ
AIPAKLKF_00250	gene	3870	rpoB
AIPAKLKF_00250	CDS	3870	rpoB	2.7.7.6	COG0085	DNA-directed RNA polymerase subunit beta
AIPAKLKF_00251	gene	3645	rpoC
AIPAKLKF_00251	CDS	3645	rpoC	2.7.7.6	COG0086	DNA-directed RNA polymerase subunit beta'
AIPAKLKF_00252	gene	1542	abgT
AIPAKLKF_00252	CDS	1542	abgT		COG2978	p-aminobenzoyl-glutamate transport protein
AIPAKLKF_00253	gene	1383	tldD_1
AIPAKLKF_00253	CDS	1383	tldD_1	3.4.-.-	COG0312	Metalloprotease TldD
AIPAKLKF_00254	gene	1350	tldD_2
AIPAKLKF_00254	CDS	1350	tldD_2	3.4.-.-	COG0312	Metalloprotease TldD
AIPAKLKF_00255	gene	603	ruvA
AIPAKLKF_00255	CDS	603	ruvA	3.6.4.12	COG0632	Holliday junction ATP-dependent DNA helicase RuvA
AIPAKLKF_00256	gene	1029	ruvB
AIPAKLKF_00256	CDS	1029	ruvB	3.6.4.12	COG2255	Holliday junction ATP-dependent DNA helicase RuvB
AIPAKLKF_00257	gene	924	ppaC
AIPAKLKF_00257	CDS	924	ppaC	3.6.1.1	COG1227	Manganese-dependent inorganic pyrophosphatase
AIPAKLKF_00258	gene	567	glpG_1
AIPAKLKF_00258	CDS	567	glpG_1	3.4.21.105		Rhomboid protease GlpG
AIPAKLKF_00259	gene	273
AIPAKLKF_00259	CDS	273				hypothetical protein
AIPAKLKF_00260	gene	831
AIPAKLKF_00260	CDS	831				hypothetical protein
AIPAKLKF_00261	gene	2640	ppdK
AIPAKLKF_00261	CDS	2640	ppdK	2.7.9.1	COG0574	Pyruvate, phosphate dikinase
AIPAKLKF_00262	gene	1764
AIPAKLKF_00262	CDS	1764				hypothetical protein
AIPAKLKF_00263	gene	1227	recF_1
AIPAKLKF_00263	CDS	1227	recF_1			DNA replication and repair protein RecF
AIPAKLKF_00264	gene	204
AIPAKLKF_00264	CDS	204				hypothetical protein
AIPAKLKF_00265	gene	2802
AIPAKLKF_00265	CDS	2802				hypothetical protein
AIPAKLKF_00266	gene	609
AIPAKLKF_00266	CDS	609				hypothetical protein
AIPAKLKF_00267	gene	573
AIPAKLKF_00267	CDS	573				hypothetical protein
AIPAKLKF_00268	gene	1839	yjcD
AIPAKLKF_00268	CDS	1839	yjcD	3.6.4.12	COG0210	Putative ATP-dependent DNA helicase YjcD
AIPAKLKF_00269	gene	126
AIPAKLKF_00269	CDS	126				hypothetical protein
AIPAKLKF_00270	gene	1872
AIPAKLKF_00270	CDS	1872				hypothetical protein
AIPAKLKF_00271	gene	1617
AIPAKLKF_00271	CDS	1617				hypothetical protein
AIPAKLKF_00272	gene	726	divIB
AIPAKLKF_00272	CDS	726	divIB			Cell division protein DivIB
AIPAKLKF_00273	gene	1347	ftsZ
AIPAKLKF_00273	CDS	1347	ftsZ			Cell division protein FtsZ
AIPAKLKF_00274	gene	900	hexR
AIPAKLKF_00274	CDS	900	hexR		COG1737	HTH-type transcriptional regulator HexR
AIPAKLKF_00275	gene	1227	baiN
AIPAKLKF_00275	CDS	1227	baiN	1.3.1.114	COG2081	3-dehydro-bile acid delta(4,6)-reductase
AIPAKLKF_00276	gene	672	cmk
AIPAKLKF_00276	CDS	672	cmk	2.7.4.25	COG0283	Cytidylate kinase
AIPAKLKF_00277	gene	1941	ispH
AIPAKLKF_00277	CDS	1941	ispH	1.17.7.4		4-hydroxy-3-methylbut-2-enyl diphosphate reductase
AIPAKLKF_00278	gene	156
AIPAKLKF_00278	CDS	156				hypothetical protein
AIPAKLKF_00279	gene	156
AIPAKLKF_00279	CDS	156				hypothetical protein
AIPAKLKF_00280	gene	2016	rtpR
AIPAKLKF_00280	CDS	2016	rtpR	1.17.4.2		Adenosylcobalamin-dependent ribonucleoside-triphosphate reductase
AIPAKLKF_00281	gene	504	dut
AIPAKLKF_00281	CDS	504	dut	3.6.1.23		Deoxyuridine 5'-triphosphate nucleotidohydrolase
AIPAKLKF_00282	gene	2637	valS
AIPAKLKF_00282	CDS	2637	valS	6.1.1.9	COG0525	Valine--tRNA ligase
AIPAKLKF_00283	gene	1425	gerAA
AIPAKLKF_00283	CDS	1425	gerAA			Spore germination protein A1
AIPAKLKF_00284	gene	1236
AIPAKLKF_00284	CDS	1236		3.4.11.-		Aminopeptidase 2
AIPAKLKF_00285	gene	315
AIPAKLKF_00285	CDS	315				hypothetical protein
AIPAKLKF_00286	gene	1203
AIPAKLKF_00286	CDS	1203				hypothetical protein
AIPAKLKF_00287	gene	2100	pgpH
AIPAKLKF_00287	CDS	2100	pgpH	3.1.4.59		Cyclic-di-AMP phosphodiesterase PgpH
AIPAKLKF_00288	gene	453	ybeY
AIPAKLKF_00288	CDS	453	ybeY	3.1.-.-	COG0319	Endoribonuclease YbeY
AIPAKLKF_00289	gene	384	cdd
AIPAKLKF_00289	CDS	384	cdd	3.5.4.5	COG0295	Cytidine deaminase
AIPAKLKF_00290	gene	912	era
AIPAKLKF_00290	CDS	912	era		COG1159	GTPase Era
AIPAKLKF_00291	gene	156
AIPAKLKF_00291	CDS	156				hypothetical protein
AIPAKLKF_00292	gene	438
AIPAKLKF_00292	CDS	438				hypothetical protein
AIPAKLKF_00293	gene	453	tadA
AIPAKLKF_00293	CDS	453	tadA	3.5.4.33	COG0590	tRNA-specific adenosine deaminase
AIPAKLKF_00294	gene	507	infC
AIPAKLKF_00294	CDS	507	infC		COG0290	Translation initiation factor IF-3
AIPAKLKF_00295	gene	198	rpmI
AIPAKLKF_00295	CDS	198	rpmI		COG0291	50S ribosomal protein L35
AIPAKLKF_00296	gene	360	rplT
AIPAKLKF_00296	CDS	360	rplT		COG0292	50S ribosomal protein L20
AIPAKLKF_00297	gene	1608	ybiT
AIPAKLKF_00297	CDS	1608	ybiT		COG0488	putative ABC transporter ATP-binding protein YbiT
AIPAKLKF_00298	gene	702
AIPAKLKF_00298	CDS	702				hypothetical protein
AIPAKLKF_00299	gene	1773
AIPAKLKF_00299	CDS	1773				hypothetical protein
AIPAKLKF_00300	gene	2538	plsX_1
AIPAKLKF_00300	CDS	2538	plsX_1	2.3.1.274		Phosphate acyltransferase
AIPAKLKF_00301	gene	234	grdB_1
AIPAKLKF_00301	CDS	234	grdB_1	1.21.4.2		Glycine reductase complex component B subunit gamma
AIPAKLKF_00302	gene	1047	grdB_2
AIPAKLKF_00302	CDS	1047	grdB_2	1.21.4.2		Glycine reductase complex component B subunit gamma
AIPAKLKF_00303	gene	324	grdA1
AIPAKLKF_00303	CDS	324	grdA1	1.21.4.2		Glycine/sarcosine/betaine reductase complex component A1
AIPAKLKF_00304	gene	132	grdA
AIPAKLKF_00304	CDS	132	grdA	1.21.4.2		Glycine/sarcosine/betaine reductase complex component A
AIPAKLKF_00305	gene	1287	grdE
AIPAKLKF_00305	CDS	1287	grdE	1.21.4.2		Glycine reductase complex component B subunits alpha and beta
AIPAKLKF_00306	gene	321	trxA
AIPAKLKF_00306	CDS	321	trxA		COG0526	Thioredoxin
AIPAKLKF_00307	gene	942	trxB
AIPAKLKF_00307	CDS	942	trxB	1.8.1.9		Thioredoxin reductase
AIPAKLKF_00308	gene	366
AIPAKLKF_00308	CDS	366				hypothetical protein
AIPAKLKF_00309	gene	1881	selB
AIPAKLKF_00309	CDS	1881	selB		COG3276	Selenocysteine-specific elongation factor
AIPAKLKF_00310	gene	96
AIPAKLKF_00310	tRNA	96				tRNA-SeC(tca)
AIPAKLKF_00311	gene	1176	selA
AIPAKLKF_00311	CDS	1176	selA	2.9.1.1	COG1921	L-seryl-tRNA(Sec) selenium transferase
AIPAKLKF_00312	gene	318
AIPAKLKF_00312	CDS	318				hypothetical protein
AIPAKLKF_00313	gene	1116	csd
AIPAKLKF_00313	CDS	1116	csd	2.8.1.7		putative cysteine desulfurase
AIPAKLKF_00314	gene	963	selD
AIPAKLKF_00314	CDS	963	selD	2.7.9.3	COG0709	Selenide, water dikinase
AIPAKLKF_00315	gene	573
AIPAKLKF_00315	CDS	573				hypothetical protein
AIPAKLKF_00316	gene	249
AIPAKLKF_00316	CDS	249				hypothetical protein
AIPAKLKF_00317	gene	1026
AIPAKLKF_00317	CDS	1026				hypothetical protein
AIPAKLKF_00318	gene	2223	pyrK_1
AIPAKLKF_00318	CDS	2223	pyrK_1			Dihydroorotate dehydrogenase B (NAD(+)), electron transfer subunit
AIPAKLKF_00319	gene	849	ywpJ
AIPAKLKF_00319	CDS	849	ywpJ	3.1.3.-	COG0561	Phosphatase YwpJ
AIPAKLKF_00320	gene	1026	ltaA
AIPAKLKF_00320	CDS	1026	ltaA	4.1.2.49		L-allo-threonine aldolase
AIPAKLKF_00321	gene	5196
AIPAKLKF_00321	CDS	5196				hypothetical protein
AIPAKLKF_00322	gene	74
AIPAKLKF_00322	tRNA	74				tRNA-Trp(cca)
AIPAKLKF_00323	gene	86
AIPAKLKF_00323	tRNA	86				tRNA-Leu(aag)
AIPAKLKF_00324	gene	72
AIPAKLKF_00324	tRNA	72				tRNA-Gly(gcc)
AIPAKLKF_00325	gene	72
AIPAKLKF_00325	tRNA	72				tRNA-Gln(ttg)
AIPAKLKF_00326	gene	867
AIPAKLKF_00326	CDS	867				hypothetical protein
AIPAKLKF_00327	gene	729
AIPAKLKF_00327	CDS	729				hypothetical protein
AIPAKLKF_00328	gene	324
AIPAKLKF_00328	CDS	324				hypothetical protein
AIPAKLKF_00329	gene	1380
AIPAKLKF_00329	CDS	1380				hypothetical protein
AIPAKLKF_00330	gene	1038
AIPAKLKF_00330	CDS	1038				Sodium-lithium/proton antiporter
AIPAKLKF_00331	gene	894
AIPAKLKF_00331	CDS	894				hypothetical protein
AIPAKLKF_00332	gene	594
AIPAKLKF_00332	CDS	594				hypothetical protein
AIPAKLKF_00333	gene	315
AIPAKLKF_00333	CDS	315				hypothetical protein
AIPAKLKF_00334	gene	1383
AIPAKLKF_00334	CDS	1383				hypothetical protein
AIPAKLKF_00335	gene	1221
AIPAKLKF_00335	CDS	1221		4.3.1.2		Methylaspartate ammonia-lyase
AIPAKLKF_00336	gene	1476	glmE
AIPAKLKF_00336	CDS	1476	glmE	5.4.99.1		Glutamate mutase epsilon subunit
AIPAKLKF_00337	gene	1380
AIPAKLKF_00337	CDS	1380				hypothetical protein
AIPAKLKF_00338	gene	462	glmS
AIPAKLKF_00338	CDS	462	glmS	5.4.99.1		Glutamate mutase sigma subunit
AIPAKLKF_00339	gene	516	toxN_1
AIPAKLKF_00339	CDS	516	toxN_1	3.1.-.-		Endoribonuclease ToxN
AIPAKLKF_00340	gene	1095	ychF
AIPAKLKF_00340	CDS	1095	ychF		COG0012	Ribosome-binding ATPase YchF
AIPAKLKF_00341	gene	180
AIPAKLKF_00341	CDS	180				hypothetical protein
AIPAKLKF_00342	gene	420
AIPAKLKF_00342	CDS	420				hypothetical protein
AIPAKLKF_00343	gene	489	dfrA
AIPAKLKF_00343	CDS	489	dfrA	1.5.1.3	COG0262	Dihydrofolate reductase
AIPAKLKF_00344	gene	264	rpsT
AIPAKLKF_00344	CDS	264	rpsT		COG0268	30S ribosomal protein S20
AIPAKLKF_00345	gene	981	gpr
AIPAKLKF_00345	CDS	981	gpr	3.4.24.78		Germination protease
AIPAKLKF_00346	gene	279	hup
AIPAKLKF_00346	CDS	279	hup			DNA-binding protein HU
AIPAKLKF_00347	gene	240
AIPAKLKF_00347	CDS	240				hypothetical protein
AIPAKLKF_00348	gene	258	yabP
AIPAKLKF_00348	CDS	258	yabP			Spore protein YabP
AIPAKLKF_00349	gene	510
AIPAKLKF_00349	CDS	510				hypothetical protein
AIPAKLKF_00350	gene	270
AIPAKLKF_00350	CDS	270				hypothetical protein
AIPAKLKF_00351	gene	312	rpsJ
AIPAKLKF_00351	CDS	312	rpsJ		COG0051	30S ribosomal protein S10
AIPAKLKF_00352	gene	639	rplC
AIPAKLKF_00352	CDS	639	rplC		COG0087	50S ribosomal protein L3
AIPAKLKF_00353	gene	621	rplD
AIPAKLKF_00353	CDS	621	rplD			50S ribosomal protein L4
AIPAKLKF_00354	gene	300	rplW
AIPAKLKF_00354	CDS	300	rplW			50S ribosomal protein L23
AIPAKLKF_00355	gene	831	rplB
AIPAKLKF_00355	CDS	831	rplB			50S ribosomal protein L2
AIPAKLKF_00356	gene	285	rpsS
AIPAKLKF_00356	CDS	285	rpsS			30S ribosomal protein S19
AIPAKLKF_00357	gene	387	rplV
AIPAKLKF_00357	CDS	387	rplV		COG0091	50S ribosomal protein L22
AIPAKLKF_00358	gene	660	rpsC
AIPAKLKF_00358	CDS	660	rpsC		COG0092	30S ribosomal protein S3
AIPAKLKF_00359	gene	438	rplP
AIPAKLKF_00359	CDS	438	rplP		COG0197	50S ribosomal protein L16
AIPAKLKF_00360	gene	207	rpmC
AIPAKLKF_00360	CDS	207	rpmC		COG0255	50S ribosomal protein L29
AIPAKLKF_00361	gene	255	rpsQ
AIPAKLKF_00361	CDS	255	rpsQ		COG0186	30S ribosomal protein S17
AIPAKLKF_00362	gene	369	rplN
AIPAKLKF_00362	CDS	369	rplN		COG0093	50S ribosomal protein L14
AIPAKLKF_00363	gene	333	rplX
AIPAKLKF_00363	CDS	333	rplX			50S ribosomal protein L24
AIPAKLKF_00364	gene	546	rplE
AIPAKLKF_00364	CDS	546	rplE			50S ribosomal protein L5
AIPAKLKF_00365	gene	186	rpsN1
AIPAKLKF_00365	CDS	186	rpsN1		COG0199	30S ribosomal protein S14
AIPAKLKF_00366	gene	402	rpsH
AIPAKLKF_00366	CDS	402	rpsH		COG0096	30S ribosomal protein S8
AIPAKLKF_00367	gene	543	rplF
AIPAKLKF_00367	CDS	543	rplF		COG0097	50S ribosomal protein L6
AIPAKLKF_00368	gene	369	rplR
AIPAKLKF_00368	CDS	369	rplR		COG0256	50S ribosomal protein L18
AIPAKLKF_00369	gene	504	rpsE
AIPAKLKF_00369	CDS	504	rpsE		COG0098	30S ribosomal protein S5
AIPAKLKF_00370	gene	183	rpmD
AIPAKLKF_00370	CDS	183	rpmD		COG1841	50S ribosomal protein L30
AIPAKLKF_00371	gene	441	rplO
AIPAKLKF_00371	CDS	441	rplO		COG0200	50S ribosomal protein L15
AIPAKLKF_00372	gene	1254	secY
AIPAKLKF_00372	CDS	1254	secY		COG0201	Protein translocase subunit SecY
AIPAKLKF_00373	gene	633	adk
AIPAKLKF_00373	CDS	633	adk	2.7.4.3		Adenylate kinase
AIPAKLKF_00374	gene	750	map
AIPAKLKF_00374	CDS	750	map	3.4.11.18	COG0024	Methionine aminopeptidase 1
AIPAKLKF_00375	gene	987
AIPAKLKF_00375	CDS	987				IS1595 family transposase ISCco3
AIPAKLKF_00376	gene	273
AIPAKLKF_00376	CDS	273				hypothetical protein
AIPAKLKF_00377	gene	219	infA
AIPAKLKF_00377	CDS	219	infA			Translation initiation factor IF-1
AIPAKLKF_00378	gene	114	rpmJ
AIPAKLKF_00378	CDS	114	rpmJ		COG0257	50S ribosomal protein L36
AIPAKLKF_00379	gene	366	rpsM
AIPAKLKF_00379	CDS	366	rpsM		COG0099	30S ribosomal protein S13
AIPAKLKF_00380	gene	396	rpsK
AIPAKLKF_00380	CDS	396	rpsK			30S ribosomal protein S11
AIPAKLKF_00381	gene	600	rpsD
AIPAKLKF_00381	CDS	600	rpsD		COG0522	30S ribosomal protein S4
AIPAKLKF_00382	gene	966	rpoA
AIPAKLKF_00382	CDS	966	rpoA	2.7.7.6	COG0202	DNA-directed RNA polymerase subunit alpha
AIPAKLKF_00383	gene	537	rplQ
AIPAKLKF_00383	CDS	537	rplQ			50S ribosomal protein L17
AIPAKLKF_00384	gene	783
AIPAKLKF_00384	CDS	783				hypothetical protein
AIPAKLKF_00385	gene	1554
AIPAKLKF_00385	CDS	1554				hypothetical protein
AIPAKLKF_00386	gene	696
AIPAKLKF_00386	CDS	696				hypothetical protein
AIPAKLKF_00387	gene	1440	pepA
AIPAKLKF_00387	CDS	1440	pepA	3.4.11.1	COG0260	Cytosol aminopeptidase
AIPAKLKF_00388	gene	588	tdk
AIPAKLKF_00388	CDS	588	tdk	2.7.1.21	COG1435	Thymidine kinase
AIPAKLKF_00389	gene	2004
AIPAKLKF_00389	CDS	2004				hypothetical protein
AIPAKLKF_00390	gene	1413	gltX
AIPAKLKF_00390	CDS	1413	gltX	6.1.1.17	COG0008	Glutamate--tRNA ligase
AIPAKLKF_00391	gene	1182
AIPAKLKF_00391	CDS	1182				hypothetical protein
AIPAKLKF_00392	gene	519	folT
AIPAKLKF_00392	CDS	519	folT			Folate transporter FolT
AIPAKLKF_00393	gene	1239
AIPAKLKF_00393	CDS	1239				hypothetical protein
AIPAKLKF_00394	gene	612
AIPAKLKF_00394	CDS	612				hypothetical protein
AIPAKLKF_00395	gene	681
AIPAKLKF_00395	CDS	681				hypothetical protein
AIPAKLKF_00396	gene	1179
AIPAKLKF_00396	CDS	1179				hypothetical protein
AIPAKLKF_00397	gene	510
AIPAKLKF_00397	CDS	510				hypothetical protein
AIPAKLKF_00398	gene	453
AIPAKLKF_00398	CDS	453				hypothetical protein
AIPAKLKF_00399	gene	579	aroK
AIPAKLKF_00399	CDS	579	aroK	2.7.1.71		Shikimate kinase
AIPAKLKF_00400	gene	558	efp
AIPAKLKF_00400	CDS	558	efp		COG0231	Elongation factor P
AIPAKLKF_00401	gene	738
AIPAKLKF_00401	CDS	738				hypothetical protein
AIPAKLKF_00402	gene	588
AIPAKLKF_00402	CDS	588				hypothetical protein
AIPAKLKF_00403	gene	477	rimP
AIPAKLKF_00403	CDS	477	rimP			Ribosome maturation factor RimP
AIPAKLKF_00404	gene	1095	nusA
AIPAKLKF_00404	CDS	1095	nusA		COG0195	Transcription termination/antitermination protein NusA
AIPAKLKF_00405	gene	267
AIPAKLKF_00405	CDS	267				hypothetical protein
AIPAKLKF_00406	gene	318	rplGA
AIPAKLKF_00406	CDS	318	rplGA		COG1358	putative ribosomal protein YlxQ
AIPAKLKF_00407	gene	2013	infB
AIPAKLKF_00407	CDS	2013	infB			Translation initiation factor IF-2
AIPAKLKF_00408	gene	345	rbfA
AIPAKLKF_00408	CDS	345	rbfA		COG0858	30S ribosome-binding factor
AIPAKLKF_00409	gene	969	nrnA
AIPAKLKF_00409	CDS	969	nrnA	3.1.-.-	COG0618	Bifunctional oligoribonuclease and PAP phosphatase NrnA
AIPAKLKF_00410	gene	900	truB
AIPAKLKF_00410	CDS	900	truB	5.4.99.25		tRNA pseudouridine synthase B
AIPAKLKF_00411	gene	915	ribF
AIPAKLKF_00411	CDS	915	ribF		COG0196	Bifunctional riboflavin kinase/FMN adenylyltransferase
AIPAKLKF_00412	gene	651	nth
AIPAKLKF_00412	CDS	651	nth	4.2.99.18	COG0177	Endonuclease III
AIPAKLKF_00413	gene	1980	gyrB_1
AIPAKLKF_00413	CDS	1980	gyrB_1	5.6.2.2	COG0187	DNA gyrase subunit B
AIPAKLKF_00414	gene	2079	gyrA_1
AIPAKLKF_00414	CDS	2079	gyrA_1	5.6.2.2	COG0188	DNA gyrase subunit A
AIPAKLKF_00415	gene	1782
AIPAKLKF_00415	CDS	1782		1.18.1.2		Ferredoxin--NADP reductase
AIPAKLKF_00416	gene	768
AIPAKLKF_00416	CDS	768				hypothetical protein
AIPAKLKF_00417	gene	693	ydjZ
AIPAKLKF_00417	CDS	693	ydjZ		COG0398	TVP38/TMEM64 family inner membrane protein YdjZ
AIPAKLKF_00418	gene	1047
AIPAKLKF_00418	CDS	1047				hypothetical protein
AIPAKLKF_00419	gene	597	ynjF
AIPAKLKF_00419	CDS	597	ynjF		COG0558	Inner membrane protein YnjF
AIPAKLKF_00420	gene	1167	ynjB
AIPAKLKF_00420	CDS	1167	ynjB		COG4134	Protein YnjB
AIPAKLKF_00421	gene	891	potH
AIPAKLKF_00421	CDS	891	potH		COG1176	Putrescine transport system permease protein PotH
AIPAKLKF_00422	gene	786
AIPAKLKF_00422	CDS	786				hypothetical protein
AIPAKLKF_00423	gene	1005	btuD_1
AIPAKLKF_00423	CDS	1005	btuD_1	7.6.2.8		Vitamin B12 import ATP-binding protein BtuD
AIPAKLKF_00424	gene	942	ykfA
AIPAKLKF_00424	CDS	942	ykfA	3.4.16.-	COG1619	putative murein peptide carboxypeptidase
AIPAKLKF_00425	gene	1119	scmP
AIPAKLKF_00425	CDS	1119	scmP	3.5.1.-	COG1473	N-acetylcysteine deacetylase
AIPAKLKF_00426	gene	951
AIPAKLKF_00426	CDS	951				hypothetical protein
AIPAKLKF_00427	gene	1839
AIPAKLKF_00427	CDS	1839				hypothetical protein
AIPAKLKF_00428	gene	1278	davT
AIPAKLKF_00428	CDS	1278	davT	2.6.1.48	COG0160	5-aminovalerate aminotransferase DavT
AIPAKLKF_00429	gene	852	srtB
AIPAKLKF_00429	CDS	852	srtB	3.4.22.-	COG4509	Sortase B
AIPAKLKF_00430	gene	591	comEA
AIPAKLKF_00430	CDS	591	comEA		COG1555	ComE operon protein 1
AIPAKLKF_00431	gene	693	walR_2
AIPAKLKF_00431	CDS	693	walR_2		COG0745	Transcriptional regulatory protein WalR
AIPAKLKF_00432	gene	1422	rcsC
AIPAKLKF_00432	CDS	1422	rcsC	2.7.13.3		Sensor histidine kinase RcsC
AIPAKLKF_00433	gene	915
AIPAKLKF_00433	CDS	915				hypothetical protein
AIPAKLKF_00434	gene	2265	comEC
AIPAKLKF_00434	CDS	2265	comEC		COG0658	ComE operon protein 3
AIPAKLKF_00435	gene	996	yqeN
AIPAKLKF_00435	CDS	996	yqeN		COG1466	putative protein YqeN
AIPAKLKF_00436	gene	861
AIPAKLKF_00436	CDS	861				hypothetical protein
AIPAKLKF_00437	gene	285	groS
AIPAKLKF_00437	CDS	285	groS			10 kDa chaperonin
AIPAKLKF_00438	gene	1620	groL
AIPAKLKF_00438	CDS	1620	groL		COG0459	60 kDa chaperonin
AIPAKLKF_00439	gene	1347
AIPAKLKF_00439	CDS	1347		3.4.13.-		Putative dipeptidase
AIPAKLKF_00440	gene	1527
AIPAKLKF_00440	CDS	1527				hypothetical protein
AIPAKLKF_00441	gene	672	birA
AIPAKLKF_00441	CDS	672	birA	6.3.4.15	COG0340	Bifunctional ligase/repressor BirA
AIPAKLKF_00442	gene	1191	dacB
AIPAKLKF_00442	CDS	1191	dacB	3.4.16.4	COG1686	D-alanyl-D-alanine carboxypeptidase DacB
AIPAKLKF_00443	gene	1482	spoIVA
AIPAKLKF_00443	CDS	1482	spoIVA	3.6.1.3		Stage IV sporulation protein A
AIPAKLKF_00444	gene	252
AIPAKLKF_00444	CDS	252				hypothetical protein
AIPAKLKF_00445	gene	1671	fhs
AIPAKLKF_00445	CDS	1671	fhs	6.3.4.3	COG2759	Formate--tetrahydrofolate ligase
AIPAKLKF_00446	gene	681	sfsA
AIPAKLKF_00446	CDS	681	sfsA		COG1489	Sugar fermentation stimulation protein A
AIPAKLKF_00447	gene	840	rimK
AIPAKLKF_00447	CDS	840	rimK	6.3.2.-	COG0189	Ribosomal protein S6--L-glutamate ligase
AIPAKLKF_00448	gene	1209	cinA
AIPAKLKF_00448	CDS	1209	cinA		COG1058	Putative competence-damage inducible protein
AIPAKLKF_00449	gene	1026	hflK
AIPAKLKF_00449	CDS	1026	hflK		COG0330	Modulator of FtsH protease HflK
AIPAKLKF_00450	gene	858	hflC
AIPAKLKF_00450	CDS	858	hflC		COG0330	Modulator of FtsH protease HflC
AIPAKLKF_00451	gene	429
AIPAKLKF_00451	CDS	429				hypothetical protein
AIPAKLKF_00452	gene	951
AIPAKLKF_00452	CDS	951				hypothetical protein
AIPAKLKF_00453	gene	1557	spoVB
AIPAKLKF_00453	CDS	1557	spoVB		COG2244	Stage V sporulation protein B
AIPAKLKF_00454	gene	1848	uvrC
AIPAKLKF_00454	CDS	1848	uvrC		COG0322	UvrABC system protein C
AIPAKLKF_00455	gene	915	hprK
AIPAKLKF_00455	CDS	915	hprK	2.7.11.-		HPr kinase/phosphorylase
AIPAKLKF_00456	gene	951	glcK
AIPAKLKF_00456	CDS	951	glcK	2.7.1.2	COG1940	Glucokinase
AIPAKLKF_00457	gene	888	murB
AIPAKLKF_00457	CDS	888	murB	1.3.1.98	COG0812	UDP-N-acetylenolpyruvoylglucosamine reductase
AIPAKLKF_00458	gene	867	yvcJ
AIPAKLKF_00458	CDS	867	yvcJ		COG1660	Nucleotide-binding protein YvcJ
AIPAKLKF_00459	gene	885	whiA
AIPAKLKF_00459	CDS	885	whiA			cell division protein WhiA
AIPAKLKF_00460	gene	243
AIPAKLKF_00460	CDS	243				hypothetical protein
AIPAKLKF_00461	gene	903
AIPAKLKF_00461	CDS	903				hypothetical protein
AIPAKLKF_00462	gene	1845	htpG
AIPAKLKF_00462	CDS	1845	htpG		COG0326	Chaperone protein HtpG
AIPAKLKF_00463	gene	465
AIPAKLKF_00463	CDS	465				hypothetical protein
AIPAKLKF_00464	gene	1653	glnS
AIPAKLKF_00464	CDS	1653	glnS	6.1.1.18	COG0008	Glutamine--tRNA ligase
AIPAKLKF_00465	gene	1863	ubiD
AIPAKLKF_00465	CDS	1863	ubiD	4.1.1.98		3-octaprenyl-4-hydroxybenzoate carboxy-lyase
AIPAKLKF_00466	gene	876	COQ2
AIPAKLKF_00466	CDS	876	COQ2	2.5.1.39		4-hydroxybenzoate polyprenyltransferase, mitochondrial
AIPAKLKF_00467	gene	585	ecdB
AIPAKLKF_00467	CDS	585	ecdB	2.5.1.129	COG0163	putative UbiX-like flavin prenyltransferase
AIPAKLKF_00468	gene	336	glpE
AIPAKLKF_00468	CDS	336	glpE	2.8.1.1		Thiosulfate sulfurtransferase GlpE
AIPAKLKF_00469	gene	642	sigK
AIPAKLKF_00469	CDS	642	sigK			RNA polymerase sigma-28 factor
AIPAKLKF_00470	gene	624	engB
AIPAKLKF_00470	CDS	624	engB		COG0218	putative GTP-binding protein EngB
AIPAKLKF_00471	gene	393
AIPAKLKF_00471	CDS	393				hypothetical protein
AIPAKLKF_00472	gene	804
AIPAKLKF_00472	CDS	804				hypothetical protein
AIPAKLKF_00473	gene	327
AIPAKLKF_00473	CDS	327				hypothetical protein
AIPAKLKF_00474	gene	1290
AIPAKLKF_00474	CDS	1290		2.8.3.-	COG0427	Butyryl-CoA:acetate CoA-transferase
AIPAKLKF_00475	gene	2310	fadN
AIPAKLKF_00475	CDS	2310	fadN	1.1.1.35	COG1024	putative 3-hydroxyacyl-CoA dehydrogenase
AIPAKLKF_00476	gene	1179	fadA
AIPAKLKF_00476	CDS	1179	fadA	2.3.1.16	COG0183	3-ketoacyl-CoA thiolase
AIPAKLKF_00477	gene	1743
AIPAKLKF_00477	CDS	1743				hypothetical protein
AIPAKLKF_00478	gene	210
AIPAKLKF_00478	CDS	210				hypothetical protein
AIPAKLKF_00479	gene	189
AIPAKLKF_00479	CDS	189				hypothetical protein
AIPAKLKF_00480	gene	1350	glmU
AIPAKLKF_00480	CDS	1350	glmU			Bifunctional protein GlmU
AIPAKLKF_00481	gene	1125	glpG_2
AIPAKLKF_00481	CDS	1125	glpG_2	3.4.21.105		Rhomboid protease GlpG
AIPAKLKF_00482	gene	1200
AIPAKLKF_00482	CDS	1200				hypothetical protein
AIPAKLKF_00483	gene	2889
AIPAKLKF_00483	CDS	2889				hypothetical protein
AIPAKLKF_00484	gene	1515
AIPAKLKF_00484	CDS	1515				hypothetical protein
AIPAKLKF_00485	gene	1611	pyrG
AIPAKLKF_00485	CDS	1611	pyrG	6.3.4.2		CTP synthase
AIPAKLKF_00486	gene	2436
AIPAKLKF_00486	CDS	2436				hypothetical protein
AIPAKLKF_00487	gene	2478
AIPAKLKF_00487	CDS	2478				hypothetical protein
AIPAKLKF_00488	gene	702	rsuA
AIPAKLKF_00488	CDS	702	rsuA	5.4.99.19	COG1187	Ribosomal small subunit pseudouridine synthase A
AIPAKLKF_00489	gene	2463	glgP
AIPAKLKF_00489	CDS	2463	glgP	2.4.1.1	COG0058	Glycogen phosphorylase
AIPAKLKF_00490	gene	2055
AIPAKLKF_00490	CDS	2055				hypothetical protein
AIPAKLKF_00491	gene	315
AIPAKLKF_00491	CDS	315				hypothetical protein
AIPAKLKF_00492	gene	1383	tilS
AIPAKLKF_00492	CDS	1383	tilS	6.3.4.19	COG0037	tRNA(Ile)-lysidine synthase
AIPAKLKF_00493	gene	528	hpt
AIPAKLKF_00493	CDS	528	hpt	2.4.2.8	COG0634	Hypoxanthine phosphoribosyltransferase
AIPAKLKF_00494	gene	2040	ftsH
AIPAKLKF_00494	CDS	2040	ftsH	3.4.24.-	COG0465	ATP-dependent zinc metalloprotease FtsH
AIPAKLKF_00495	gene	855
AIPAKLKF_00495	CDS	855				hypothetical protein
AIPAKLKF_00496	gene	1725	pgcA
AIPAKLKF_00496	CDS	1725	pgcA	5.4.2.2		Phosphoglucomutase
AIPAKLKF_00497	gene	729
AIPAKLKF_00497	CDS	729				hypothetical protein
AIPAKLKF_00498	gene	210
AIPAKLKF_00498	CDS	210				hypothetical protein
AIPAKLKF_00499	gene	603
AIPAKLKF_00499	CDS	603				hypothetical protein
AIPAKLKF_00500	gene	354
AIPAKLKF_00500	CDS	354				hypothetical protein
AIPAKLKF_00501	gene	234	rpsR
AIPAKLKF_00501	CDS	234	rpsR			30S ribosomal protein S18
AIPAKLKF_00502	gene	459	ssb
AIPAKLKF_00502	CDS	459	ssb		COG0629	Single-stranded DNA-binding protein
AIPAKLKF_00503	gene	288	rpsF
AIPAKLKF_00503	CDS	288	rpsF		COG0360	30S ribosomal protein S6
AIPAKLKF_00504	gene	171
AIPAKLKF_00504	CDS	171				hypothetical protein
AIPAKLKF_00505	gene	1077
AIPAKLKF_00505	CDS	1077				hypothetical protein
AIPAKLKF_00506	gene	813	ttcA
AIPAKLKF_00506	CDS	813	ttcA	2.8.1.-	COG0037	tRNA-cytidine(32) 2-sulfurtransferase
AIPAKLKF_00507	gene	618	fmnP_1
AIPAKLKF_00507	CDS	618	fmnP_1		COG3601	Riboflavin transporter FmnP
AIPAKLKF_00508	gene	987	dnaA_1
AIPAKLKF_00508	CDS	987	dnaA_1			Chromosomal replication initiator protein DnaA
AIPAKLKF_00509	gene	1017
AIPAKLKF_00509	CDS	1017				hypothetical protein
AIPAKLKF_00510	gene	1377	murC
AIPAKLKF_00510	CDS	1377	murC	6.3.2.8	COG0773	UDP-N-acetylmuramate--L-alanine ligase
AIPAKLKF_00511	gene	1278	glgC
AIPAKLKF_00511	CDS	1278	glgC	2.7.7.27	COG0448	Glucose-1-phosphate adenylyltransferase
AIPAKLKF_00512	gene	1110	glgD
AIPAKLKF_00512	CDS	1110	glgD		COG0448	Glycogen biosynthesis protein GlgD
AIPAKLKF_00513	gene	1692	argS
AIPAKLKF_00513	CDS	1692	argS	6.1.1.19	COG0018	Arginine--tRNA ligase
AIPAKLKF_00514	gene	915	dagK
AIPAKLKF_00514	CDS	915	dagK	2.7.1.107	COG1597	Diacylglycerol kinase
AIPAKLKF_00515	gene	912
AIPAKLKF_00515	CDS	912				hypothetical protein
AIPAKLKF_00516	gene	1977	spoVD_1
AIPAKLKF_00516	CDS	1977	spoVD_1		COG0768	Stage V sporulation protein D
AIPAKLKF_00517	gene	642	pcp
AIPAKLKF_00517	CDS	642	pcp	3.4.19.3		Pyrrolidone-carboxylate peptidase
AIPAKLKF_00518	gene	114
AIPAKLKF_00518	CDS	114				hypothetical protein
AIPAKLKF_00519	gene	249
AIPAKLKF_00519	CDS	249				hypothetical protein
AIPAKLKF_00520	gene	1662	ptsI
AIPAKLKF_00520	CDS	1662	ptsI	2.7.3.9	COG1080	Phosphoenolpyruvate-protein phosphotransferase
AIPAKLKF_00521	gene	261	ptsH
AIPAKLKF_00521	CDS	261	ptsH		COG1925	Phosphocarrier protein HPr
AIPAKLKF_00522	gene	456	crr
AIPAKLKF_00522	CDS	456	crr			PTS system glucose-specific EIIA component
AIPAKLKF_00523	gene	1440
AIPAKLKF_00523	CDS	1440				hypothetical protein
AIPAKLKF_00524	gene	2034
AIPAKLKF_00524	CDS	2034				hypothetical protein
AIPAKLKF_00525	gene	1581
AIPAKLKF_00525	CDS	1581				hypothetical protein
AIPAKLKF_00526	gene	636
AIPAKLKF_00526	CDS	636				hypothetical protein
AIPAKLKF_00527	gene	717	tcdA
AIPAKLKF_00527	CDS	717	tcdA	6.1.-.-	COG1179	tRNA threonylcarbamoyladenosine dehydratase
AIPAKLKF_00528	gene	954
AIPAKLKF_00528	CDS	954				hypothetical protein
AIPAKLKF_00529	gene	924
AIPAKLKF_00529	CDS	924				hypothetical protein
AIPAKLKF_00530	gene	219	acpP_1
AIPAKLKF_00530	CDS	219	acpP_1			Acyl carrier protein
AIPAKLKF_00531	gene	795	accA
AIPAKLKF_00531	CDS	795	accA	2.1.3.15	COG0825	Acetyl-coenzyme A carboxylase carboxyl transferase subunit alpha
AIPAKLKF_00532	gene	843	accD
AIPAKLKF_00532	CDS	843	accD	2.1.3.15	COG0777	Acetyl-coenzyme A carboxylase carboxyl transferase subunit beta
AIPAKLKF_00533	gene	1347	accC
AIPAKLKF_00533	CDS	1347	accC	6.3.4.14	COG0439	Biotin carboxylase
AIPAKLKF_00534	gene	432	fabZ
AIPAKLKF_00534	CDS	432	fabZ	4.2.1.59	COG0764	3-hydroxyacyl-[acyl-carrier-protein] dehydratase FabZ
AIPAKLKF_00535	gene	429	accB
AIPAKLKF_00535	CDS	429	accB		COG0511	Biotin carboxyl carrier protein of acetyl-CoA carboxylase
AIPAKLKF_00536	gene	1236	fabF
AIPAKLKF_00536	CDS	1236	fabF	2.3.1.179	COG0304	3-oxoacyl-[acyl-carrier-protein] synthase 2
AIPAKLKF_00537	gene	729	fabG_1
AIPAKLKF_00537	CDS	729	fabG_1	1.1.1.100		3-oxoacyl-[acyl-carrier-protein] reductase FabG
AIPAKLKF_00538	gene	933	fabD
AIPAKLKF_00538	CDS	933	fabD	2.3.1.39		Malonyl CoA-acyl carrier protein transacylase
AIPAKLKF_00539	gene	945
AIPAKLKF_00539	CDS	945		1.6.5.11	COG2070	NADH:quinone reductase
AIPAKLKF_00540	gene	972	fabH
AIPAKLKF_00540	CDS	972	fabH	2.3.1.180	COG0332	3-oxoacyl-[acyl-carrier-protein] synthase 3
AIPAKLKF_00541	gene	462
AIPAKLKF_00541	CDS	462				hypothetical protein
AIPAKLKF_00542	gene	1074
AIPAKLKF_00542	CDS	1074				hypothetical protein
AIPAKLKF_00543	gene	1413	pgi
AIPAKLKF_00543	CDS	1413	pgi	5.3.1.9	COG0166	Glucose-6-phosphate isomerase
AIPAKLKF_00544	gene	384	gloA
AIPAKLKF_00544	CDS	384	gloA	4.4.1.5	COG0346	Lactoylglutathione lyase
AIPAKLKF_00545	gene	1035
AIPAKLKF_00545	CDS	1035				hypothetical protein
AIPAKLKF_00546	gene	765	dtd3
AIPAKLKF_00546	CDS	765	dtd3	3.1.1.96		D-aminoacyl-tRNA deacylase
AIPAKLKF_00547	gene	1926	metG
AIPAKLKF_00547	CDS	1926	metG	6.1.1.10		Methionine--tRNA ligase
AIPAKLKF_00548	gene	840	rsmI
AIPAKLKF_00548	CDS	840	rsmI	2.1.1.198		Ribosomal RNA small subunit methyltransferase I
AIPAKLKF_00549	gene	723	yfiC
AIPAKLKF_00549	CDS	723	yfiC	2.1.1.223		tRNA1(Val) (adenine(37)-N6)-methyltransferase
AIPAKLKF_00550	gene	876
AIPAKLKF_00550	CDS	876				hypothetical protein
AIPAKLKF_00551	gene	975
AIPAKLKF_00551	CDS	975				hypothetical protein
AIPAKLKF_00552	gene	441
AIPAKLKF_00552	CDS	441				hypothetical protein
AIPAKLKF_00553	gene	621	tmk
AIPAKLKF_00553	CDS	621	tmk	2.7.4.9	COG0125	Thymidylate kinase
AIPAKLKF_00554	gene	1590	malQ
AIPAKLKF_00554	CDS	1590	malQ	2.4.1.25	COG1640	4-alpha-glucanotransferase
AIPAKLKF_00555	gene	1269	dctA
AIPAKLKF_00555	CDS	1269	dctA		COG1301	C4-dicarboxylate transport protein
AIPAKLKF_00556	gene	1794	pepF1
AIPAKLKF_00556	CDS	1794	pepF1	3.4.24.-		Oligoendopeptidase F, plasmid
AIPAKLKF_00557	gene	759	yfcA
AIPAKLKF_00557	CDS	759	yfcA		COG0730	putative membrane transporter protein YfcA
AIPAKLKF_00558	gene	1959	thrS
AIPAKLKF_00558	CDS	1959	thrS	6.1.1.3	COG0441	Threonine--tRNA ligase 1
AIPAKLKF_00559	gene	546
AIPAKLKF_00559	CDS	546				hypothetical protein
AIPAKLKF_00560	gene	621
AIPAKLKF_00560	CDS	621				hypothetical protein
AIPAKLKF_00561	gene	540
AIPAKLKF_00561	CDS	540				hypothetical protein
AIPAKLKF_00562	gene	1164
AIPAKLKF_00562	CDS	1164				hypothetical protein
AIPAKLKF_00563	gene	696
AIPAKLKF_00563	CDS	696				hypothetical protein
AIPAKLKF_00564	gene	1164	gerN
AIPAKLKF_00564	CDS	1164	gerN		COG0475	Na(+)/H(+)-K(+) antiporter GerN
AIPAKLKF_00565	gene	813	noc
AIPAKLKF_00565	CDS	813	noc		COG1475	Nucleoid occlusion protein
AIPAKLKF_00566	gene	717	rsmG
AIPAKLKF_00566	CDS	717	rsmG	2.1.1.-	COG0357	Ribosomal RNA small subunit methyltransferase G
AIPAKLKF_00567	gene	1902	mnmG
AIPAKLKF_00567	CDS	1902	mnmG			tRNA uridine 5-carboxymethylaminomethyl modification enzyme MnmG
AIPAKLKF_00568	gene	1386	mnmE
AIPAKLKF_00568	CDS	1386	mnmE	3.6.-.-	COG0486	tRNA modification GTPase MnmE
AIPAKLKF_00569	gene	414
AIPAKLKF_00569	CDS	414				hypothetical protein
AIPAKLKF_00570	gene	564	pth
AIPAKLKF_00570	CDS	564	pth	3.1.1.29	COG0193	Peptidyl-tRNA hydrolase
AIPAKLKF_00571	gene	3501	mfd
AIPAKLKF_00571	CDS	3501	mfd	3.6.4.-		Transcription-repair-coupling factor
AIPAKLKF_00572	gene	1527
AIPAKLKF_00572	CDS	1527				hypothetical protein
AIPAKLKF_00573	gene	1497	gerBA
AIPAKLKF_00573	CDS	1497	gerBA			Spore germination protein B1
AIPAKLKF_00574	gene	1101	yndE
AIPAKLKF_00574	CDS	1101	yndE			Spore germination protein YndE
AIPAKLKF_00575	gene	1116
AIPAKLKF_00575	CDS	1116				hypothetical protein
AIPAKLKF_00576	gene	900
AIPAKLKF_00576	CDS	900				hypothetical protein
AIPAKLKF_00577	gene	702	mtnN
AIPAKLKF_00577	CDS	702	mtnN	3.2.2.9		5'-methylthioadenosine/S-adenosylhomocysteine nucleosidase
AIPAKLKF_00578	gene	489
AIPAKLKF_00578	CDS	489				hypothetical protein
AIPAKLKF_00579	gene	1353	glmM
AIPAKLKF_00579	CDS	1353	glmM	5.4.2.10	COG1109	Phosphoglucosamine mutase
AIPAKLKF_00580	gene	1287
AIPAKLKF_00580	CDS	1287				hypothetical protein
AIPAKLKF_00581	gene	870	cdaA
AIPAKLKF_00581	CDS	870	cdaA	2.7.7.85	COG1624	Cyclic di-AMP synthase CdaA
AIPAKLKF_00582	gene	939
AIPAKLKF_00582	CDS	939				hypothetical protein
AIPAKLKF_00583	gene	399
AIPAKLKF_00583	CDS	399				hypothetical protein
AIPAKLKF_00584	gene	648
AIPAKLKF_00584	CDS	648				hypothetical protein
AIPAKLKF_00585	gene	1614
AIPAKLKF_00585	CDS	1614				hypothetical protein
AIPAKLKF_00586	gene	417
AIPAKLKF_00586	CDS	417				hypothetical protein
AIPAKLKF_00587	gene	684	regX3
AIPAKLKF_00587	CDS	684	regX3		COG0745	Sensory transduction protein regX3
AIPAKLKF_00588	gene	1377	sasA
AIPAKLKF_00588	CDS	1377	sasA	2.7.-.-		Adaptive-response sensory-kinase SasA
AIPAKLKF_00589	gene	3114	mupA
AIPAKLKF_00589	CDS	3114	mupA			mupirocin-resistant isoleucine--tRNA ligase MupA
AIPAKLKF_00590	gene	3435
AIPAKLKF_00590	CDS	3435				hypothetical protein
AIPAKLKF_00591	gene	996	trpS
AIPAKLKF_00591	CDS	996	trpS	6.1.1.2	COG0180	Tryptophan--tRNA ligase
AIPAKLKF_00592	gene	369	acpS
AIPAKLKF_00592	CDS	369	acpS	2.7.8.7	COG0736	Holo-[acyl-carrier-protein] synthase
AIPAKLKF_00593	gene	1140	nagA
AIPAKLKF_00593	CDS	1140	nagA	3.5.1.25	COG1820	N-acetylglucosamine-6-phosphate deacetylase
AIPAKLKF_00594	gene	774	gamA
AIPAKLKF_00594	CDS	774	gamA	3.5.99.6	COG0363	putative glucosamine-6-phosphate deaminase 2
AIPAKLKF_00595	gene	378
AIPAKLKF_00595	CDS	378				hypothetical protein
AIPAKLKF_00596	gene	318
AIPAKLKF_00596	CDS	318				hypothetical protein
AIPAKLKF_00597	gene	483
AIPAKLKF_00597	CDS	483				hypothetical protein
AIPAKLKF_00598	gene	636	prsW
AIPAKLKF_00598	CDS	636	prsW	3.4.-.-	COG2339	Protease PrsW
AIPAKLKF_00599	gene	459	ndx1
AIPAKLKF_00599	CDS	459	ndx1	3.6.1.61	COG0494	Diadenosine hexaphosphate hydrolase
AIPAKLKF_00600	gene	201
AIPAKLKF_00600	CDS	201				hypothetical protein
AIPAKLKF_00601	gene	744	kdsB
AIPAKLKF_00601	CDS	744	kdsB	2.7.7.38		8-amino-3,8-dideoxy-manno-octulosonate cytidylyltransferase
AIPAKLKF_00602	gene	1002	pseB
AIPAKLKF_00602	CDS	1002	pseB	4.2.1.115	COG1086	UDP-N-acetylglucosamine 4,6-dehydratase (inverting)
AIPAKLKF_00603	gene	1197	pseC
AIPAKLKF_00603	CDS	1197	pseC	2.6.1.92	COG0399	UDP-4-amino-4,6-dideoxy-N-acetyl-beta-L-altrosamine transaminase
AIPAKLKF_00604	gene	903
AIPAKLKF_00604	CDS	903				hypothetical protein
AIPAKLKF_00605	gene	1056	pseI
AIPAKLKF_00605	CDS	1056	pseI	2.5.1.97	COG2089	Pseudaminic acid synthase
AIPAKLKF_00606	gene	594	rbr1
AIPAKLKF_00606	CDS	594	rbr1	1.11.1.1	COG1592	Rubrerythrin-1
AIPAKLKF_00607	gene	1146	dacF
AIPAKLKF_00607	CDS	1146	dacF	3.4.16.4	COG1686	D-alanyl-D-alanine carboxypeptidase DacF
	repeat_region	312
AIPAKLKF_00608	gene	618	fmnP_2
AIPAKLKF_00608	CDS	618	fmnP_2		COG3601	Riboflavin transporter FmnP
AIPAKLKF_00609	gene	1011
AIPAKLKF_00609	CDS	1011				hypothetical protein
AIPAKLKF_00610	gene	648
AIPAKLKF_00610	CDS	648				hypothetical protein
AIPAKLKF_00611	gene	1329	mepA_1
AIPAKLKF_00611	CDS	1329	mepA_1		COG0534	Multidrug export protein MepA
AIPAKLKF_00612	gene	249
AIPAKLKF_00612	CDS	249				hypothetical protein
AIPAKLKF_00613	gene	624
AIPAKLKF_00613	CDS	624				hypothetical protein
AIPAKLKF_00614	gene	552
AIPAKLKF_00614	CDS	552				hypothetical protein
AIPAKLKF_00615	gene	507
AIPAKLKF_00615	CDS	507				hypothetical protein
AIPAKLKF_00616	gene	1071
AIPAKLKF_00616	CDS	1071				hypothetical protein
AIPAKLKF_00617	gene	459	hit
AIPAKLKF_00617	CDS	459	hit		COG0537	Protein hit
AIPAKLKF_00618	gene	1413	glgA
AIPAKLKF_00618	CDS	1413	glgA	2.4.1.21	COG0297	Glycogen synthase
AIPAKLKF_00619	gene	1185
AIPAKLKF_00619	CDS	1185				hypothetical protein
AIPAKLKF_00620	gene	681
AIPAKLKF_00620	CDS	681				hypothetical protein
AIPAKLKF_00621	gene	76
AIPAKLKF_00621	tRNA	76				tRNA-Arg(acg)
AIPAKLKF_00622	gene	1452	nagE
AIPAKLKF_00622	CDS	1452	nagE		COG1263	PTS system N-acetylglucosamine-specific EIICBA component
AIPAKLKF_00623	gene	1161	nadD
AIPAKLKF_00623	CDS	1161	nadD	2.7.7.18		nicotinate-nucleotide adenylyltransferase
AIPAKLKF_00624	gene	342	rsfS
AIPAKLKF_00624	CDS	342	rsfS			Ribosomal silencing factor RsfS
AIPAKLKF_00625	gene	720	recO
AIPAKLKF_00625	CDS	720	recO			DNA repair protein RecO
AIPAKLKF_00626	gene	1458
AIPAKLKF_00626	CDS	1458				hypothetical protein
AIPAKLKF_00627	gene	624	pyrE
AIPAKLKF_00627	CDS	624	pyrE	2.4.2.10	COG0461	Orotate phosphoribosyltransferase
AIPAKLKF_00628	gene	1203	pyrC_1
AIPAKLKF_00628	CDS	1203	pyrC_1	3.5.2.3	COG0044	Dihydroorotase
AIPAKLKF_00629	gene	723	pyrF
AIPAKLKF_00629	CDS	723	pyrF	4.1.1.23	COG0284	Orotidine 5'-phosphate decarboxylase
AIPAKLKF_00630	gene	951	pyrD
AIPAKLKF_00630	CDS	951	pyrD	1.3.1.14	COG0167	Dihydroorotate dehydrogenase B (NAD(+)), catalytic subunit
AIPAKLKF_00631	gene	783	pyrK_2
AIPAKLKF_00631	CDS	783	pyrK_2		COG0543	Dihydroorotate dehydrogenase B (NAD(+)), electron transfer subunit
AIPAKLKF_00632	gene	582
AIPAKLKF_00632	CDS	582				hypothetical protein
AIPAKLKF_00633	gene	1302
AIPAKLKF_00633	CDS	1302				hypothetical protein
AIPAKLKF_00634	gene	114
AIPAKLKF_00634	CDS	114				hypothetical protein
AIPAKLKF_00635	gene	1068	carA
AIPAKLKF_00635	CDS	1068	carA	6.3.5.5	COG0505	Carbamoyl-phosphate synthase small chain
AIPAKLKF_00636	gene	3207	carB
AIPAKLKF_00636	CDS	3207	carB	6.3.5.5		Carbamoyl-phosphate synthase large chain
AIPAKLKF_00637	gene	1023	pyrB_1
AIPAKLKF_00637	CDS	1023	pyrB_1	2.1.3.2	COG0540	Aspartate carbamoyltransferase catalytic subunit
AIPAKLKF_00638	gene	1218
AIPAKLKF_00638	CDS	1218				hypothetical protein
AIPAKLKF_00639	gene	729	fabG_2
AIPAKLKF_00639	CDS	729	fabG_2	1.1.1.100		3-oxoacyl-[acyl-carrier-protein] reductase FabG
AIPAKLKF_00640	gene	855	nfo
AIPAKLKF_00640	CDS	855	nfo	3.1.21.2	COG0648	putative endonuclease 4
AIPAKLKF_00641	gene	777
AIPAKLKF_00641	CDS	777				hypothetical protein
AIPAKLKF_00642	gene	1248
AIPAKLKF_00642	CDS	1248				hypothetical protein
AIPAKLKF_00643	gene	681
AIPAKLKF_00643	CDS	681				hypothetical protein
AIPAKLKF_00644	gene	717	nadE
AIPAKLKF_00644	CDS	717	nadE	6.3.1.5	COG0171	NH(3)-dependent NAD(+) synthetase
AIPAKLKF_00645	gene	420
AIPAKLKF_00645	CDS	420				hypothetical protein
AIPAKLKF_00646	gene	843	focA
AIPAKLKF_00646	CDS	843	focA		COG2116	putative formate transporter 1
AIPAKLKF_00647	gene	2259
AIPAKLKF_00647	CDS	2259				hypothetical protein
AIPAKLKF_00648	gene	1278	obg
AIPAKLKF_00648	CDS	1278	obg	3.6.5.-	COG0536	GTPase Obg
AIPAKLKF_00649	gene	294
AIPAKLKF_00649	CDS	294				hypothetical protein
AIPAKLKF_00650	gene	864	fba
AIPAKLKF_00650	CDS	864	fba	4.1.2.13		Fructose-bisphosphate aldolase
AIPAKLKF_00651	gene	783	spo0A
AIPAKLKF_00651	CDS	783	spo0A			Stage 0 sporulation protein A
AIPAKLKF_00652	gene	1380	tcyP
AIPAKLKF_00652	CDS	1380	tcyP		COG1823	L-cystine uptake protein TcyP
AIPAKLKF_00653	gene	369
AIPAKLKF_00653	CDS	369				hypothetical protein
AIPAKLKF_00654	gene	501	rimM
AIPAKLKF_00654	CDS	501	rimM			Ribosome maturation factor RimM
AIPAKLKF_00655	gene	684	trmD
AIPAKLKF_00655	CDS	684	trmD	2.1.1.228		tRNA (guanine-N(1)-)-methyltransferase
AIPAKLKF_00656	gene	606	recR
AIPAKLKF_00656	CDS	606	recR		COG0353	Recombination protein RecR
AIPAKLKF_00657	gene	342
AIPAKLKF_00657	CDS	342			COG0718	Nucleoid-associated protein
AIPAKLKF_00658	gene	1581
AIPAKLKF_00658	CDS	1581				hypothetical protein
AIPAKLKF_00659	gene	999
AIPAKLKF_00659	CDS	999				hypothetical protein
AIPAKLKF_00660	gene	423	rpsL
AIPAKLKF_00660	CDS	423	rpsL		COG0048	30S ribosomal protein S12
AIPAKLKF_00661	gene	471	rpsG
AIPAKLKF_00661	CDS	471	rpsG			30S ribosomal protein S7
AIPAKLKF_00662	gene	2085	fusA
AIPAKLKF_00662	CDS	2085	fusA		COG0480	Elongation factor G
AIPAKLKF_00663	gene	1200	tuf
AIPAKLKF_00663	CDS	1200	tuf		COG0050	Elongation factor Tu
AIPAKLKF_00664	gene	2955
AIPAKLKF_00664	CDS	2955				hypothetical protein
AIPAKLKF_00665	gene	237
AIPAKLKF_00665	CDS	237				hypothetical protein
AIPAKLKF_00666	gene	2961
AIPAKLKF_00666	CDS	2961				hypothetical protein
AIPAKLKF_00667	gene	99
AIPAKLKF_00667	CDS	99				hypothetical protein
AIPAKLKF_00668	gene	1443
AIPAKLKF_00668	CDS	1443				hypothetical protein
AIPAKLKF_00669	gene	480
AIPAKLKF_00669	CDS	480				hypothetical protein
AIPAKLKF_00670	gene	498	yrdA
AIPAKLKF_00670	CDS	498	yrdA		COG0663	Protein YrdA
AIPAKLKF_00671	gene	1455	pepD
AIPAKLKF_00671	CDS	1455	pepD	3.4.13.18	COG2195	Cytosol non-specific dipeptidase
AIPAKLKF_00672	gene	1368
AIPAKLKF_00672	CDS	1368				hypothetical protein
AIPAKLKF_00673	gene	432
AIPAKLKF_00673	CDS	432				hypothetical protein
AIPAKLKF_00674	gene	717	rph
AIPAKLKF_00674	CDS	717	rph	2.7.7.56	COG0689	Ribonuclease PH
AIPAKLKF_00675	gene	2571	secA
AIPAKLKF_00675	CDS	2571	secA		COG0653	Protein translocase subunit SecA
AIPAKLKF_00676	gene	1506	gsiB_3
AIPAKLKF_00676	CDS	1506	gsiB_3		COG0747	Glutathione-binding protein GsiB
AIPAKLKF_00677	gene	675
AIPAKLKF_00677	CDS	675		2.4.2.-	COG2071	Putative glutamine amidotransferase
AIPAKLKF_00678	gene	1347	mepA_2
AIPAKLKF_00678	CDS	1347	mepA_2		COG0534	Multidrug export protein MepA
AIPAKLKF_00679	gene	192
AIPAKLKF_00679	CDS	192				hypothetical protein
AIPAKLKF_00680	gene	354
AIPAKLKF_00680	CDS	354				hypothetical protein
AIPAKLKF_00681	gene	972
AIPAKLKF_00681	CDS	972				hypothetical protein
AIPAKLKF_00682	gene	435
AIPAKLKF_00682	CDS	435				hypothetical protein
AIPAKLKF_00683	gene	1494
AIPAKLKF_00683	CDS	1494				hypothetical protein
AIPAKLKF_00684	gene	735	sapB
AIPAKLKF_00684	CDS	735	sapB		COG1285	Protein SapB
AIPAKLKF_00685	gene	879	sdhA
AIPAKLKF_00685	CDS	879	sdhA	4.3.1.17		L-serine dehydratase, alpha chain
AIPAKLKF_00686	gene	660	sdhB
AIPAKLKF_00686	CDS	660	sdhB	4.3.1.17		L-serine dehydratase, beta chain
AIPAKLKF_00687	gene	1041
AIPAKLKF_00687	CDS	1041				hypothetical protein
AIPAKLKF_00688	gene	438	rplM
AIPAKLKF_00688	CDS	438	rplM		COG0102	50S ribosomal protein L13
AIPAKLKF_00689	gene	390	rpsI
AIPAKLKF_00689	CDS	390	rpsI		COG0103	30S ribosomal protein S9
AIPAKLKF_00690	gene	477
AIPAKLKF_00690	CDS	477				hypothetical protein
AIPAKLKF_00691	gene	222
AIPAKLKF_00691	CDS	222				hypothetical protein
AIPAKLKF_00692	gene	1074
AIPAKLKF_00692	CDS	1074				hypothetical protein
AIPAKLKF_00693	gene	876	rsmA
AIPAKLKF_00693	CDS	876	rsmA	2.1.1.182	COG0030	Ribosomal RNA small subunit methyltransferase A
AIPAKLKF_00694	gene	2538
AIPAKLKF_00694	CDS	2538				hypothetical protein
AIPAKLKF_00695	gene	123
AIPAKLKF_00695	CDS	123				hypothetical protein
AIPAKLKF_00696	gene	204
AIPAKLKF_00696	CDS	204				hypothetical protein
AIPAKLKF_00697	gene	498
AIPAKLKF_00697	CDS	498				hypothetical protein
AIPAKLKF_00698	gene	132
AIPAKLKF_00698	CDS	132				hypothetical protein
AIPAKLKF_00699	gene	150
AIPAKLKF_00699	CDS	150				hypothetical protein
AIPAKLKF_00700	gene	1737	hndD
AIPAKLKF_00700	CDS	1737	hndD	1.12.1.3	COG3383	NADP-reducing hydrogenase subunit HndD
AIPAKLKF_00701	gene	1794	hndC
AIPAKLKF_00701	CDS	1794	hndC	1.12.1.3	COG1145	NADP-reducing hydrogenase subunit HndC
AIPAKLKF_00702	gene	501	hndA
AIPAKLKF_00702	CDS	501	hndA	1.12.1.3	COG1905	NADP-reducing hydrogenase subunit HndA
AIPAKLKF_00703	gene	1107
AIPAKLKF_00703	CDS	1107		1.8.-.-	COG0502	[FeFe] hydrogenase maturase subunit HydE
AIPAKLKF_00704	gene	405
AIPAKLKF_00704	CDS	405				hypothetical protein
AIPAKLKF_00705	gene	879
AIPAKLKF_00705	CDS	879				hypothetical protein
AIPAKLKF_00706	gene	723
AIPAKLKF_00706	CDS	723				hypothetical protein
AIPAKLKF_00707	gene	630	yxlF
AIPAKLKF_00707	CDS	630	yxlF	3.6.3.-	COG1131	putative ABC transporter ATP-binding protein YxlF
AIPAKLKF_00708	gene	1380	mqnC
AIPAKLKF_00708	CDS	1380	mqnC	1.21.98.1		Cyclic dehypoxanthine futalosine synthase
AIPAKLKF_00709	gene	480
AIPAKLKF_00709	CDS	480				hypothetical protein
AIPAKLKF_00710	gene	459
AIPAKLKF_00710	CDS	459				hypothetical protein
AIPAKLKF_00711	gene	1020	adhE_1
AIPAKLKF_00711	CDS	1020	adhE_1		COG1012	Aldehyde-alcohol dehydrogenase
AIPAKLKF_00712	gene	1635	nfdA
AIPAKLKF_00712	CDS	1635	nfdA	3.5.1.91		N-substituted formamide deformylase
AIPAKLKF_00713	gene	192
AIPAKLKF_00713	CDS	192				hypothetical protein
AIPAKLKF_00714	gene	474
AIPAKLKF_00714	CDS	474				hypothetical protein
AIPAKLKF_00715	gene	5445
AIPAKLKF_00715	CDS	5445				hypothetical protein
	repeat_region	1552
AIPAKLKF_00716	gene	81
AIPAKLKF_00716	tRNA	81				tRNA-Leu(tag)
AIPAKLKF_00717	gene	2007	fldZ
AIPAKLKF_00717	CDS	2007	fldZ	1.3.1.-		Cinnamate reductase
AIPAKLKF_00718	gene	195	secE
AIPAKLKF_00718	CDS	195	secE			Protein translocase subunit SecE
AIPAKLKF_00719	gene	519	nusG
AIPAKLKF_00719	CDS	519	nusG			Transcription termination/antitermination protein NusG
AIPAKLKF_00720	gene	426	rplK
AIPAKLKF_00720	CDS	426	rplK		COG0080	50S ribosomal protein L11
AIPAKLKF_00721	gene	696	rplA
AIPAKLKF_00721	CDS	696	rplA			50S ribosomal protein L1
AIPAKLKF_00722	gene	501	rplJ
AIPAKLKF_00722	CDS	501	rplJ			50S ribosomal protein L10
AIPAKLKF_00723	gene	372	rplL
AIPAKLKF_00723	CDS	372	rplL			50S ribosomal protein L7/L12
AIPAKLKF_00724	gene	519
AIPAKLKF_00724	CDS	519				hypothetical protein
AIPAKLKF_00725	gene	825	tepA
AIPAKLKF_00725	CDS	825	tepA		COG0740	Translocation-enhancing protein TepA
AIPAKLKF_00726	gene	609	glnQ
AIPAKLKF_00726	CDS	609	glnQ			Glutamine transport ATP-binding protein GlnQ
AIPAKLKF_00727	gene	786	fetB
AIPAKLKF_00727	CDS	786	fetB		COG0390	putative iron export permease protein FetB
AIPAKLKF_00728	gene	807	larE
AIPAKLKF_00728	CDS	807	larE	4.4.1.37	COG1606	Pyridinium-3,5-bisthiocarboxylic acid mononucleotide synthase
AIPAKLKF_00729	gene	765	larB
AIPAKLKF_00729	CDS	765	larB	2.5.1.143	COG1691	Pyridinium-3,5-biscarboxylic acid mononucleotide synthase
AIPAKLKF_00730	gene	906	larC_1
AIPAKLKF_00730	CDS	906	larC_1	4.99.1.12		Pyridinium-3,5-bisthiocarboxylic acid mononucleotide nickel insertion protein
AIPAKLKF_00731	gene	405	larC_2
AIPAKLKF_00731	CDS	405	larC_2	4.99.1.12		Pyridinium-3,5-bisthiocarboxylic acid mononucleotide nickel insertion protein
AIPAKLKF_00732	gene	1260	aroE
AIPAKLKF_00732	CDS	1260	aroE	1.1.1.25		Shikimate dehydrogenase (NADP(+))
AIPAKLKF_00733	gene	447	aroQ
AIPAKLKF_00733	CDS	447	aroQ	4.2.1.10	COG0757	3-dehydroquinate dehydratase
AIPAKLKF_00734	gene	1014	aroB
AIPAKLKF_00734	CDS	1014	aroB	4.2.3.4	COG0337	3-dehydroquinate synthase
AIPAKLKF_00735	gene	1077	aroC
AIPAKLKF_00735	CDS	1077	aroC	4.2.3.5	COG0082	Chorismate synthase
AIPAKLKF_00736	gene	267
AIPAKLKF_00736	CDS	267				hypothetical protein
AIPAKLKF_00737	gene	1302	aroA
AIPAKLKF_00737	CDS	1302	aroA	2.5.1.19	COG0128	3-phosphoshikimate 1-carboxyvinyltransferase
AIPAKLKF_00738	gene	1428
AIPAKLKF_00738	CDS	1428				hypothetical protein
AIPAKLKF_00739	gene	837	arnA
AIPAKLKF_00739	CDS	837	arnA		COG0223	Bifunctional polymyxin resistance protein ArnA
AIPAKLKF_00740	gene	675
AIPAKLKF_00740	CDS	675				hypothetical protein
AIPAKLKF_00741	gene	453
AIPAKLKF_00741	CDS	453				hypothetical protein
AIPAKLKF_00742	gene	300
AIPAKLKF_00742	CDS	300				hypothetical protein
AIPAKLKF_00743	gene	306
AIPAKLKF_00743	CDS	306				hypothetical protein
AIPAKLKF_00744	gene	891	btuF
AIPAKLKF_00744	CDS	891	btuF		COG0614	Vitamin B12-binding protein
AIPAKLKF_00745	gene	1011	hmuU
AIPAKLKF_00745	CDS	1011	hmuU		COG0609	Hemin transport system permease protein HmuU
AIPAKLKF_00746	gene	756	yusV
AIPAKLKF_00746	CDS	756	yusV		COG1120	putative siderophore transport system ATP-binding protein YusV
AIPAKLKF_00747	gene	672
AIPAKLKF_00747	CDS	672				hypothetical protein
AIPAKLKF_00748	gene	798	cobQ
AIPAKLKF_00748	CDS	798	cobQ			Cobyric acid synthase
AIPAKLKF_00749	gene	417	phaJ
AIPAKLKF_00749	CDS	417	phaJ	4.2.1.119	COG2030	(R)-specific enoyl-CoA hydratase
AIPAKLKF_00750	gene	381	kal
AIPAKLKF_00750	CDS	381	kal	4.3.1.14		3-aminobutyryl-CoA ammonia lyase
AIPAKLKF_00751	gene	816	kce
AIPAKLKF_00751	CDS	816	kce	2.3.1.247	COG3246	3-keto-5-aminohexanoate cleavage enzyme
AIPAKLKF_00752	gene	651	ctfA
AIPAKLKF_00752	CDS	651	ctfA	2.8.3.9		Butyrate--acetoacetate CoA-transferase subunit A
AIPAKLKF_00753	gene	663	ctfB
AIPAKLKF_00753	CDS	663	ctfB	2.8.3.9		Butyrate--acetoacetate CoA-transferase subunit B
AIPAKLKF_00754	gene	1038	kdd
AIPAKLKF_00754	CDS	1038	kdd	1.4.1.11		L-erythro-3,5-diaminohexanoate dehydrogenase
AIPAKLKF_00755	gene	1281	kamA
AIPAKLKF_00755	CDS	1281	kamA	5.4.3.2		L-lysine 2,3-aminomutase
AIPAKLKF_00756	gene	1029
AIPAKLKF_00756	CDS	1029				hypothetical protein
AIPAKLKF_00757	gene	1461	mutS2_1
AIPAKLKF_00757	CDS	1461	mutS2_1	3.1.-.-		Endonuclease MutS2
AIPAKLKF_00758	gene	1557
AIPAKLKF_00758	CDS	1557		5.4.3.3		Lysine 5,6-aminomutase alpha subunit
AIPAKLKF_00759	gene	783
AIPAKLKF_00759	CDS	783		5.4.3.3	COG5012	Lysine 5,6-aminomutase beta subunit
AIPAKLKF_00760	gene	135
AIPAKLKF_00760	CDS	135				hypothetical protein
AIPAKLKF_00761	gene	708
AIPAKLKF_00761	CDS	708				hypothetical protein
AIPAKLKF_00762	gene	1443	mleN_2
AIPAKLKF_00762	CDS	1443	mleN_2		COG1757	Malate-2H(+)/Na(+)-lactate antiporter
AIPAKLKF_00763	gene	543	rbr3A
AIPAKLKF_00763	CDS	543	rbr3A	1.11.1.1	COG1592	Reverse rubrerythrin-1
AIPAKLKF_00764	gene	2649	polA
AIPAKLKF_00764	CDS	2649	polA	2.7.7.7		DNA polymerase I
AIPAKLKF_00765	gene	597	coaE
AIPAKLKF_00765	CDS	597	coaE	2.7.1.24	COG0237	Dephospho-CoA kinase
AIPAKLKF_00766	gene	567	slt
AIPAKLKF_00766	CDS	567	slt	4.2.2.-	COG0741	Soluble lytic murein transglycosylase
AIPAKLKF_00767	gene	1617	appA
AIPAKLKF_00767	CDS	1617	appA			Oligopeptide-binding protein AppA
AIPAKLKF_00768	gene	852
AIPAKLKF_00768	CDS	852			COG1307	DegV domain-containing protein
AIPAKLKF_00769	gene	192
AIPAKLKF_00769	CDS	192				hypothetical protein
AIPAKLKF_00770	gene	609	gmk
AIPAKLKF_00770	CDS	609	gmk	2.7.4.8	COG0194	Guanylate kinase
AIPAKLKF_00771	gene	246	rpoZ
AIPAKLKF_00771	CDS	246	rpoZ	2.7.7.6		DNA-directed RNA polymerase subunit omega
AIPAKLKF_00772	gene	2442	priA
AIPAKLKF_00772	CDS	2442	priA	3.6.4.-		primosomal protein N'
AIPAKLKF_00773	gene	453	def1
AIPAKLKF_00773	CDS	453	def1	3.5.1.88	COG0242	Peptide deformylase 1
AIPAKLKF_00774	gene	951	fmt
AIPAKLKF_00774	CDS	951	fmt	2.1.2.9		Methionyl-tRNA formyltransferase
AIPAKLKF_00775	gene	696
AIPAKLKF_00775	CDS	696				hypothetical protein
AIPAKLKF_00776	gene	945
AIPAKLKF_00776	CDS	945				hypothetical protein
AIPAKLKF_00777	gene	399
AIPAKLKF_00777	CDS	399				hypothetical protein
AIPAKLKF_00778	gene	1167	bpsA
AIPAKLKF_00778	CDS	1167	bpsA	2.5.1.128		N(4)-bis(aminopropyl)spermidine synthase
AIPAKLKF_00779	gene	1428	ktrB
AIPAKLKF_00779	CDS	1428	ktrB		COG0168	Ktr system potassium uptake protein B
AIPAKLKF_00780	gene	666	ktrA
AIPAKLKF_00780	CDS	666	ktrA		COG0569	Ktr system potassium uptake protein A
AIPAKLKF_00781	gene	768	rlmB_2
AIPAKLKF_00781	CDS	768	rlmB_2	2.1.1.185		23S rRNA (guanosine-2'-O-)-methyltransferase RlmB
AIPAKLKF_00782	gene	519
AIPAKLKF_00782	CDS	519				hypothetical protein
AIPAKLKF_00783	gene	582	panT
AIPAKLKF_00783	CDS	582	panT		COG4684	Pantothenic acid transporter PanT
AIPAKLKF_00784	gene	1182	deoB
AIPAKLKF_00784	CDS	1182	deoB	5.4.2.7	COG1015	Phosphopentomutase
AIPAKLKF_00785	gene	1518	rbsA
AIPAKLKF_00785	CDS	1518	rbsA	7.5.2.7	COG1129	Ribose import ATP-binding protein RbsA
AIPAKLKF_00786	gene	1071
AIPAKLKF_00786	CDS	1071				hypothetical protein
AIPAKLKF_00787	gene	957
AIPAKLKF_00787	CDS	957				hypothetical protein
AIPAKLKF_00788	gene	687	deoC1
AIPAKLKF_00788	CDS	687	deoC1	4.1.2.4		Deoxyribose-phosphate aldolase 1
AIPAKLKF_00789	gene	705	deoD
AIPAKLKF_00789	CDS	705	deoD	2.4.2.1	COG0813	Purine nucleoside phosphorylase DeoD-type
AIPAKLKF_00790	gene	1176	tmpC
AIPAKLKF_00790	CDS	1176	tmpC		COG1744	Membrane lipoprotein TmpC
AIPAKLKF_00791	gene	1302	pdp
AIPAKLKF_00791	CDS	1302	pdp	2.4.2.2		Pyrimidine-nucleoside phosphorylase
AIPAKLKF_00792	gene	2256	gshAB
AIPAKLKF_00792	CDS	2256	gshAB		COG1181	Glutathione biosynthesis bifunctional protein GshAB
AIPAKLKF_00793	gene	765	dinG
AIPAKLKF_00793	CDS	765	dinG	3.1.-.-		3'-5' exonuclease DinG
AIPAKLKF_00794	gene	258
AIPAKLKF_00794	CDS	258				hypothetical protein
AIPAKLKF_00795	gene	2022	ligA
AIPAKLKF_00795	CDS	2022	ligA	6.5.1.2		DNA ligase
AIPAKLKF_00796	gene	411
AIPAKLKF_00796	CDS	411				hypothetical protein
AIPAKLKF_00797	gene	624
AIPAKLKF_00797	CDS	624				hypothetical protein
AIPAKLKF_00798	gene	108
AIPAKLKF_00798	CDS	108				hypothetical protein
AIPAKLKF_00799	gene	1695
AIPAKLKF_00799	CDS	1695				hypothetical protein
AIPAKLKF_00800	gene	759	srlR
AIPAKLKF_00800	CDS	759	srlR		COG1349	Glucitol operon repressor
AIPAKLKF_00801	gene	1161	purL_1
AIPAKLKF_00801	CDS	1161	purL_1	6.3.5.3		Phosphoribosylformylglycinamidine synthase
AIPAKLKF_00802	gene	2235	purL_2
AIPAKLKF_00802	CDS	2235	purL_2	6.3.5.3	COG0046	Phosphoribosylformylglycinamidine synthase
AIPAKLKF_00803	gene	1404	purF
AIPAKLKF_00803	CDS	1404	purF	2.4.2.14	COG0034	Amidophosphoribosyltransferase
AIPAKLKF_00804	gene	1002	purM
AIPAKLKF_00804	CDS	1002	purM	6.3.3.1	COG0150	Phosphoribosylformylglycinamidine cyclo-ligase
AIPAKLKF_00805	gene	579	purN
AIPAKLKF_00805	CDS	579	purN	2.1.2.2		Phosphoribosylglycinamide formyltransferase
AIPAKLKF_00806	gene	1503	purH
AIPAKLKF_00806	CDS	1503	purH		COG0138	Bifunctional purine biosynthesis protein PurH
AIPAKLKF_00807	gene	1251	purD
AIPAKLKF_00807	CDS	1251	purD	6.3.4.13	COG0151	Phosphoribosylamine--glycine ligase
AIPAKLKF_00808	gene	2511	rhaS
AIPAKLKF_00808	CDS	2511	rhaS			HTH-type transcriptional activator RhaS
AIPAKLKF_00809	gene	645	yvdM
AIPAKLKF_00809	CDS	645	yvdM	5.4.2.6	COG0637	Beta-phosphoglucomutase
AIPAKLKF_00810	gene	1722	nag3_1
AIPAKLKF_00810	CDS	1722	nag3_1	3.2.1.21	COG1472	Beta-N-acetylglucosaminidase/beta-glucosidase
AIPAKLKF_00811	gene	1785
AIPAKLKF_00811	CDS	1785				hypothetical protein
AIPAKLKF_00812	gene	1350	yagG
AIPAKLKF_00812	CDS	1350	yagG		COG2211	Putative glycoside/cation symporter YagG
AIPAKLKF_00813	gene	1113
AIPAKLKF_00813	CDS	1113		1.8.98.-	COG0641	Anaerobic sulfatase-maturating enzyme
AIPAKLKF_00814	gene	879	pta_1
AIPAKLKF_00814	CDS	879	pta_1	2.3.1.8	COG0280	Phosphate acetyltransferase
AIPAKLKF_00815	gene	1065	buk2
AIPAKLKF_00815	CDS	1065	buk2	2.7.2.7	COG3426	Butyrate kinase 2
AIPAKLKF_00816	gene	870
AIPAKLKF_00816	CDS	870				hypothetical protein
AIPAKLKF_00817	gene	882
AIPAKLKF_00817	CDS	882				hypothetical protein
AIPAKLKF_00818	gene	660	ung
AIPAKLKF_00818	CDS	660	ung	3.2.2.27	COG0692	Uracil-DNA glycosylase
AIPAKLKF_00819	gene	795	speD
AIPAKLKF_00819	CDS	795	speD	4.1.1.50	COG1586	S-adenosylmethionine decarboxylase proenzyme
AIPAKLKF_00820	gene	1458	speA
AIPAKLKF_00820	CDS	1458	speA	4.1.1.19	COG1982	Arginine decarboxylase
AIPAKLKF_00821	gene	849	speE
AIPAKLKF_00821	CDS	849	speE	2.5.1.16	COG0421	Polyamine aminopropyltransferase
AIPAKLKF_00822	gene	846	speB
AIPAKLKF_00822	CDS	846	speB	3.5.3.11	COG0010	Agmatinase
AIPAKLKF_00823	gene	264	spoIIID
AIPAKLKF_00823	CDS	264	spoIIID			Stage III sporulation protein D
AIPAKLKF_00824	gene	705	uppS
AIPAKLKF_00824	CDS	705	uppS	2.5.1.-	COG0020	Isoprenyl transferase
AIPAKLKF_00825	gene	822	cdsA
AIPAKLKF_00825	CDS	822	cdsA	2.7.7.41	COG0575	Phosphatidate cytidylyltransferase
AIPAKLKF_00826	gene	1164	dxr
AIPAKLKF_00826	CDS	1164	dxr	1.1.1.267	COG0743	1-deoxy-D-xylulose 5-phosphate reductoisomerase
AIPAKLKF_00827	gene	1074	rasP
AIPAKLKF_00827	CDS	1074	rasP	3.4.24.-	COG0750	Regulator of sigma-W protease RasP
AIPAKLKF_00828	gene	2097	rnr
AIPAKLKF_00828	CDS	2097	rnr	3.1.13.1	COG0557	Ribonuclease R
AIPAKLKF_00829	gene	1989	tkt
AIPAKLKF_00829	CDS	1989	tkt	2.2.1.1		Transketolase
AIPAKLKF_00830	gene	426
AIPAKLKF_00830	CDS	426				hypothetical protein
AIPAKLKF_00831	gene	3402	addB
AIPAKLKF_00831	CDS	3402	addB	3.1.-.-	COG3857	ATP-dependent helicase/deoxyribonuclease subunit B
AIPAKLKF_00832	gene	1536
AIPAKLKF_00832	CDS	1536				hypothetical protein
AIPAKLKF_00833	gene	672	dsbD
AIPAKLKF_00833	CDS	672	dsbD	1.8.1.8		Thiol:disulfide interchange protein DsbD
AIPAKLKF_00834	gene	600	resA
AIPAKLKF_00834	CDS	600	resA			Thiol-disulfide oxidoreductase ResA
AIPAKLKF_00835	gene	1188
AIPAKLKF_00835	CDS	1188				hypothetical protein
AIPAKLKF_00836	gene	1017	cydB
AIPAKLKF_00836	CDS	1017	cydB	7.1.1.7	COG1294	Cytochrome bd-I ubiquinol oxidase subunit 2
AIPAKLKF_00837	gene	1038	rsxD
AIPAKLKF_00837	CDS	1038	rsxD	7.-.-.-		Ion-translocating oxidoreductase complex subunit D
AIPAKLKF_00838	gene	552	rsxG
AIPAKLKF_00838	CDS	552	rsxG	7.-.-.-		Ion-translocating oxidoreductase complex subunit G
AIPAKLKF_00839	gene	624	rsxE
AIPAKLKF_00839	CDS	624	rsxE	7.-.-.-		Ion-translocating oxidoreductase complex subunit E
AIPAKLKF_00840	gene	573	rnfA_1
AIPAKLKF_00840	CDS	573	rnfA_1	7.2.1.2	COG4657	Na(+)-translocating ferredoxin:NAD(+) oxidoreductase complex subunit A
AIPAKLKF_00841	gene	162
AIPAKLKF_00841	CDS	162				hypothetical protein
AIPAKLKF_00842	gene	342	rsxB_1
AIPAKLKF_00842	CDS	342	rsxB_1	7.-.-.-		Ion-translocating oxidoreductase complex subunit B
AIPAKLKF_00843	gene	1053	ispG
AIPAKLKF_00843	CDS	1053	ispG	1.17.7.3	COG0821	4-hydroxy-3-methylbut-2-en-1-yl diphosphate synthase (flavodoxin)
AIPAKLKF_00844	gene	4332	polC
AIPAKLKF_00844	CDS	4332	polC	2.7.7.7	COG2176	DNA polymerase III PolC-type
AIPAKLKF_00845	gene	3534
AIPAKLKF_00845	CDS	3534		1.2.7.1	COG0674	Pyruvate:ferredoxin oxidoreductase
AIPAKLKF_00846	gene	1458	acp_1
AIPAKLKF_00846	CDS	1458	acp_1			Sodium/proton-dependent alanine carrier protein
AIPAKLKF_00847	gene	1461	acp_2
AIPAKLKF_00847	CDS	1461	acp_2			Sodium/proton-dependent alanine carrier protein
AIPAKLKF_00848	gene	1443	rng
AIPAKLKF_00848	CDS	1443	rng	3.1.26.-	COG1530	Ribonuclease G
AIPAKLKF_00849	gene	1365	radA
AIPAKLKF_00849	CDS	1365	radA	3.6.4.-	COG1066	DNA repair protein RadA
AIPAKLKF_00850	gene	1314	tagU
AIPAKLKF_00850	CDS	1314	tagU	2.7.8.-		Polyisoprenyl-teichoic acid--peptidoglycan teichoic acid transferase TagU
AIPAKLKF_00851	gene	357	rplS
AIPAKLKF_00851	CDS	357	rplS			50S ribosomal protein L19
AIPAKLKF_00852	gene	1074
AIPAKLKF_00852	CDS	1074				hypothetical protein
AIPAKLKF_00853	gene	255	ylmC
AIPAKLKF_00853	CDS	255	ylmC		COG1873	putative sporulation protein YlmC
AIPAKLKF_00854	gene	1587
AIPAKLKF_00854	CDS	1587				hypothetical protein
AIPAKLKF_00855	gene	2892
AIPAKLKF_00855	CDS	2892				hypothetical protein
AIPAKLKF_00856	gene	1533	guaA
AIPAKLKF_00856	CDS	1533	guaA	6.3.5.2	COG0518	GMP synthase [glutamine-hydrolyzing]
AIPAKLKF_00857	gene	1458	guaB_1
AIPAKLKF_00857	CDS	1458	guaB_1	1.1.1.205	COG0516	Inosine-5'-monophosphate dehydrogenase
AIPAKLKF_00858	gene	1182	ftsW
AIPAKLKF_00858	CDS	1182	ftsW	2.4.1.129	COG0772	putative peptidoglycan glycosyltransferase FtsW
AIPAKLKF_00859	gene	1359	murD
AIPAKLKF_00859	CDS	1359	murD	6.3.2.9		UDP-N-acetylmuramoylalanine--D-glutamate ligase
AIPAKLKF_00860	gene	978	mraY
AIPAKLKF_00860	CDS	978	mraY	2.7.8.13	COG0472	Phospho-N-acetylmuramoyl-pentapeptide-transferase
AIPAKLKF_00861	gene	1368	murF
AIPAKLKF_00861	CDS	1368	murF	6.3.2.10	COG0770	UDP-N-acetylmuramoyl-tripeptide--D-alanyl-D-alanine ligase
AIPAKLKF_00862	gene	1461	murE
AIPAKLKF_00862	CDS	1461	murE	6.3.2.13	COG0769	UDP-N-acetylmuramoyl-L-alanyl-D-glutamate--2,6-diaminopimelate ligase
AIPAKLKF_00863	gene	1290	pyrC_2
AIPAKLKF_00863	CDS	1290	pyrC_2	3.5.2.3	COG0044	Dihydroorotase
AIPAKLKF_00864	gene	918	pyrB_2
AIPAKLKF_00864	CDS	918	pyrB_2	2.1.3.2		Aspartate carbamoyltransferase
AIPAKLKF_00865	gene	921	rluD
AIPAKLKF_00865	CDS	921	rluD	5.4.99.23	COG0564	Ribosomal large subunit pseudouridine synthase D
AIPAKLKF_00866	gene	456	lspA_1
AIPAKLKF_00866	CDS	456	lspA_1	3.4.23.36	COG0597	Lipoprotein signal peptidase
AIPAKLKF_00867	gene	234
AIPAKLKF_00867	CDS	234				hypothetical protein
AIPAKLKF_00868	gene	246	rpsP
AIPAKLKF_00868	CDS	246	rpsP		COG0228	30S ribosomal protein S16
AIPAKLKF_00869	gene	1338	ffh
AIPAKLKF_00869	CDS	1338	ffh		COG0541	Signal recognition particle protein
AIPAKLKF_00870	gene	333
AIPAKLKF_00870	CDS	333				hypothetical protein
AIPAKLKF_00871	gene	1737
AIPAKLKF_00871	CDS	1737				hypothetical protein
AIPAKLKF_00872	gene	669
AIPAKLKF_00872	CDS	669				putative protein
AIPAKLKF_00873	gene	495	trmL
AIPAKLKF_00873	CDS	495	trmL	2.1.1.207	COG0219	tRNA (cytidine(34)-2'-O)-methyltransferase
AIPAKLKF_00874	gene	561	maf
AIPAKLKF_00874	CDS	561	maf	3.6.1.9	COG0424	dTTP/UTP pyrophosphatase
AIPAKLKF_00875	gene	2490	clpC
AIPAKLKF_00875	CDS	2490	clpC			ATP-dependent Clp protease ATP-binding subunit ClpC
AIPAKLKF_00876	gene	213
AIPAKLKF_00876	CDS	213				hypothetical protein
AIPAKLKF_00877	gene	984
AIPAKLKF_00877	CDS	984				IS1595 family transposase ISCco3
AIPAKLKF_00878	gene	759
AIPAKLKF_00878	CDS	759				hypothetical protein
AIPAKLKF_00879	gene	1251	wecC
AIPAKLKF_00879	CDS	1251	wecC	1.1.1.336	COG0677	UDP-N-acetyl-D-mannosamine dehydrogenase
AIPAKLKF_00880	gene	810
AIPAKLKF_00880	CDS	810				hypothetical protein
AIPAKLKF_00881	gene	963	btuD_2
AIPAKLKF_00881	CDS	963	btuD_2	7.6.2.8		Vitamin B12 import ATP-binding protein BtuD
AIPAKLKF_00882	gene	504
AIPAKLKF_00882	CDS	504				hypothetical protein
AIPAKLKF_00883	gene	879
AIPAKLKF_00883	CDS	879				hypothetical protein
AIPAKLKF_00884	gene	73
AIPAKLKF_00884	tRNA	73				tRNA-Lys(ttt)
AIPAKLKF_00885	gene	73
AIPAKLKF_00885	tRNA	73				tRNA-Phe(gaa)
AIPAKLKF_00886	gene	1065	apbE
AIPAKLKF_00886	CDS	1065	apbE	2.7.1.180	COG1477	FAD:protein FMN transferase
AIPAKLKF_00887	gene	384
AIPAKLKF_00887	CDS	384				hypothetical protein
AIPAKLKF_00888	gene	522
AIPAKLKF_00888	CDS	522				hypothetical protein
AIPAKLKF_00889	gene	615	ispU
AIPAKLKF_00889	CDS	615	ispU	2.5.1.31	COG0020	Ditrans,polycis-undecaprenyl-diphosphate synthase ((2E,6E)-farnesyl-diphosphate specific)
AIPAKLKF_00890	gene	1506	murJ_2
AIPAKLKF_00890	CDS	1506	murJ_2		COG0728	Lipid II flippase MurJ
AIPAKLKF_00891	gene	984
AIPAKLKF_00891	CDS	984				hypothetical protein
AIPAKLKF_00892	gene	1845
AIPAKLKF_00892	CDS	1845				hypothetical protein
AIPAKLKF_00893	gene	870
AIPAKLKF_00893	CDS	870			COG1173	Putative peptide transport permease protein
AIPAKLKF_00894	gene	975	dppB
AIPAKLKF_00894	CDS	975	dppB		COG0601	Dipeptide transport system permease protein DppB
AIPAKLKF_00895	gene	936	oppF_2
AIPAKLKF_00895	CDS	936	oppF_2		COG4608	Oligopeptide transport ATP-binding protein OppF
AIPAKLKF_00896	gene	1005	oppD_2
AIPAKLKF_00896	CDS	1005	oppD_2		COG0444	Oligopeptide transport ATP-binding protein OppD
AIPAKLKF_00897	gene	918	lacC
AIPAKLKF_00897	CDS	918	lacC	2.7.1.144	COG1105	Tagatose-6-phosphate kinase
AIPAKLKF_00898	gene	1533	hutH
AIPAKLKF_00898	CDS	1533	hutH	4.3.1.3	COG2986	Histidine ammonia-lyase
AIPAKLKF_00899	gene	627	fchA
AIPAKLKF_00899	CDS	627	fchA	3.5.4.9	COG3404	Methenyltetrahydrofolate cyclohydrolase
AIPAKLKF_00900	gene	1230	hutI
AIPAKLKF_00900	CDS	1230	hutI	3.5.2.7	COG1228	Imidazolonepropionase
AIPAKLKF_00901	gene	897
AIPAKLKF_00901	CDS	897		2.1.2.5	COG3643	Glutamate formimidoyltransferase
AIPAKLKF_00902	gene	2025	hutU
AIPAKLKF_00902	CDS	2025	hutU	4.2.1.49		Urocanate hydratase
AIPAKLKF_00903	gene	1845	asnO
AIPAKLKF_00903	CDS	1845	asnO	6.3.5.4	COG0367	Asparagine synthetase [glutamine-hydrolyzing] 3
AIPAKLKF_00904	gene	591	dpaB
AIPAKLKF_00904	CDS	591	dpaB	1.3.1.-	COG0452	Dipicolinate synthase subunit B
AIPAKLKF_00905	gene	771	dpaA
AIPAKLKF_00905	CDS	771	dpaA	1.3.1.-		Dipicolinate synthase subunit A
AIPAKLKF_00906	gene	207
AIPAKLKF_00906	CDS	207				hypothetical protein
AIPAKLKF_00907	gene	1062	korA
AIPAKLKF_00907	CDS	1062	korA	1.2.7.3	COG0674	2-oxoglutarate oxidoreductase subunit KorA
AIPAKLKF_00908	gene	738	korB
AIPAKLKF_00908	CDS	738	korB	1.2.7.3	COG1013	2-oxoglutarate oxidoreductase subunit KorB
AIPAKLKF_00909	gene	546
AIPAKLKF_00909	CDS	546				hypothetical protein
AIPAKLKF_00910	gene	1044	ldh
AIPAKLKF_00910	CDS	1044	ldh	1.4.1.9		Leucine dehydrogenase
AIPAKLKF_00911	gene	1764
AIPAKLKF_00911	CDS	1764				hypothetical protein
AIPAKLKF_00912	gene	117
AIPAKLKF_00912	CDS	117				hypothetical protein
AIPAKLKF_00913	gene	2859
AIPAKLKF_00913	CDS	2859				hypothetical protein
AIPAKLKF_00914	gene	1950
AIPAKLKF_00914	CDS	1950				hypothetical protein
AIPAKLKF_00915	gene	516	fumB
AIPAKLKF_00915	CDS	516	fumB	4.2.1.2	COG1838	Fumarate hydratase class I, anaerobic
AIPAKLKF_00916	gene	843	ttdA
AIPAKLKF_00916	CDS	843	ttdA	4.2.1.32	COG1951	L(+)-tartrate dehydratase subunit alpha
AIPAKLKF_00917	gene	1233
AIPAKLKF_00917	CDS	1233		1.1.1.38		NAD-dependent malic enzyme
AIPAKLKF_00918	gene	1401	aspA
AIPAKLKF_00918	CDS	1401	aspA	4.3.1.1	COG1027	Aspartate ammonia-lyase
AIPAKLKF_00919	gene	783
AIPAKLKF_00919	CDS	783				hypothetical protein
AIPAKLKF_00920	gene	285
AIPAKLKF_00920	CDS	285				hypothetical protein
AIPAKLKF_00921	gene	465	sepF
AIPAKLKF_00921	CDS	465	sepF			Cell division protein SepF
AIPAKLKF_00922	gene	693
AIPAKLKF_00922	CDS	693			COG0325	Pyridoxal phosphate homeostasis protein
AIPAKLKF_00923	gene	1254
AIPAKLKF_00923	CDS	1254				hypothetical protein
AIPAKLKF_00924	gene	1104	ylbJ
AIPAKLKF_00924	CDS	1104	ylbJ		COG3314	Sporulation integral membrane protein YlbJ
AIPAKLKF_00925	gene	531
AIPAKLKF_00925	CDS	531				hypothetical protein
AIPAKLKF_00926	gene	510	coaD
AIPAKLKF_00926	CDS	510	coaD	2.7.7.3	COG0669	Phosphopantetheine adenylyltransferase
AIPAKLKF_00927	gene	555	rsmD
AIPAKLKF_00927	CDS	555	rsmD	2.1.1.171	COG0742	Ribosomal RNA small subunit methyltransferase D
AIPAKLKF_00928	gene	2049	recG
AIPAKLKF_00928	CDS	2049	recG	3.6.4.12		ATP-dependent DNA helicase RecG
AIPAKLKF_00929	gene	1620
AIPAKLKF_00929	CDS	1620				putative protein
AIPAKLKF_00930	gene	360
AIPAKLKF_00930	CDS	360				putative protein
AIPAKLKF_00931	gene	204	rpmB
AIPAKLKF_00931	CDS	204	rpmB		COG0227	50S ribosomal protein L28
AIPAKLKF_00932	gene	177
AIPAKLKF_00932	CDS	177				hypothetical protein
AIPAKLKF_00933	gene	705	aas
AIPAKLKF_00933	CDS	705	aas	6.2.1.20		Bifunctional protein Aas
AIPAKLKF_00934	gene	243
AIPAKLKF_00934	CDS	243				hypothetical protein
AIPAKLKF_00935	gene	1323	eno
AIPAKLKF_00935	CDS	1323	eno	4.2.1.11	COG0148	Enolase
AIPAKLKF_00936	gene	1533	gpmI
AIPAKLKF_00936	CDS	1533	gpmI	5.4.2.12		2,3-bisphosphoglycerate-independent phosphoglycerate mutase
AIPAKLKF_00937	gene	756	tpiA
AIPAKLKF_00937	CDS	756	tpiA	5.3.1.1		Triosephosphate isomerase
AIPAKLKF_00938	gene	1239
AIPAKLKF_00938	CDS	1239				hypothetical protein
AIPAKLKF_00939	gene	306
AIPAKLKF_00939	CDS	306				hypothetical protein
AIPAKLKF_00940	gene	1056	xerC
AIPAKLKF_00940	CDS	1056	xerC			Tyrosine recombinase XerC
AIPAKLKF_00941	gene	1242
AIPAKLKF_00941	CDS	1242				hypothetical protein
AIPAKLKF_00942	gene	564
AIPAKLKF_00942	CDS	564				hypothetical protein
AIPAKLKF_00943	gene	549
AIPAKLKF_00943	CDS	549				hypothetical protein
AIPAKLKF_00944	gene	978	yhaM
AIPAKLKF_00944	CDS	978	yhaM	3.1.-.-	COG3481	3'-5' exoribonuclease YhaM
AIPAKLKF_00945	gene	2040
AIPAKLKF_00945	CDS	2040				hypothetical protein
AIPAKLKF_00946	gene	1353	rsmF
AIPAKLKF_00946	CDS	1353	rsmF	2.1.1.-	COG0144	Ribosomal RNA small subunit methyltransferase F
AIPAKLKF_00947	gene	660	dck
AIPAKLKF_00947	CDS	660	dck	2.7.1.74	COG1428	Deoxyadenosine/deoxycytidine kinase
AIPAKLKF_00948	gene	183	rpmF
AIPAKLKF_00948	CDS	183	rpmF			50S ribosomal protein L32
AIPAKLKF_00949	gene	504
AIPAKLKF_00949	CDS	504				hypothetical protein
AIPAKLKF_00950	gene	1191	ackA
AIPAKLKF_00950	CDS	1191	ackA	2.7.2.1	COG0282	Acetate kinase
AIPAKLKF_00951	gene	990	pta_2
AIPAKLKF_00951	CDS	990	pta_2	2.3.1.8	COG0280	Phosphate acetyltransferase
AIPAKLKF_00952	gene	618
AIPAKLKF_00952	CDS	618				hypothetical protein
AIPAKLKF_00953	gene	1191	pgk
AIPAKLKF_00953	CDS	1191	pgk	2.7.2.3	COG0126	Phosphoglycerate kinase
AIPAKLKF_00954	gene	798	hisK
AIPAKLKF_00954	CDS	798	hisK	3.1.3.15	COG1387	Histidinol-phosphatase
AIPAKLKF_00955	gene	852	lgt
AIPAKLKF_00955	CDS	852	lgt	2.5.1.145	COG0682	Phosphatidylglycerol--prolipoprotein diacylglyceryl transferase
AIPAKLKF_00956	gene	2835	uvrA
AIPAKLKF_00956	CDS	2835	uvrA			UvrABC system protein A
AIPAKLKF_00957	gene	1989	uvrB
AIPAKLKF_00957	CDS	1989	uvrB		COG0556	UvrABC system protein B
AIPAKLKF_00958	gene	1248	tmcAL
AIPAKLKF_00958	CDS	1248	tmcAL	6.3.4.-	COG1323	tRNA(Met) cytidine acetate ligase
AIPAKLKF_00959	gene	639	flr
AIPAKLKF_00959	CDS	639	flr			Flavoredoxin
AIPAKLKF_00960	gene	258	csoR
AIPAKLKF_00960	CDS	258	csoR		COG1937	Copper-sensing transcriptional repressor CsoR
AIPAKLKF_00961	gene	2520	cdr_2
AIPAKLKF_00961	CDS	2520	cdr_2	1.8.1.14		Coenzyme A disulfide reductase
AIPAKLKF_00962	gene	1311	bglA
AIPAKLKF_00962	CDS	1311	bglA	3.2.1.21	COG2723	Beta-glucosidase A
AIPAKLKF_00963	gene	735	truA_1
AIPAKLKF_00963	CDS	735	truA_1	5.4.99.12	COG0101	tRNA pseudouridine synthase A
AIPAKLKF_00964	gene	1317
AIPAKLKF_00964	CDS	1317			COG2256	putative AAA domain-containing protein
AIPAKLKF_00965	gene	1023	queA
AIPAKLKF_00965	CDS	1023	queA	2.4.99.17	COG0809	S-adenosylmethionine:tRNA ribosyltransferase-isomerase
AIPAKLKF_00966	gene	1614
AIPAKLKF_00966	CDS	1614				hypothetical protein
AIPAKLKF_00967	gene	2382	pheT
AIPAKLKF_00967	CDS	2382	pheT	6.1.1.20		Phenylalanine--tRNA ligase beta subunit
AIPAKLKF_00968	gene	1023	pheS
AIPAKLKF_00968	CDS	1023	pheS	6.1.1.20	COG0016	Phenylalanine--tRNA ligase alpha subunit
AIPAKLKF_00969	gene	549	frr
AIPAKLKF_00969	CDS	549	frr			Ribosome-recycling factor
AIPAKLKF_00970	gene	711	pyrH
AIPAKLKF_00970	CDS	711	pyrH	2.7.4.22	COG0528	Uridylate kinase
AIPAKLKF_00971	gene	963	tsf
AIPAKLKF_00971	CDS	963	tsf			Elongation factor Ts
AIPAKLKF_00972	gene	720	rpsB
AIPAKLKF_00972	CDS	720	rpsB		COG0052	30S ribosomal protein S2
AIPAKLKF_00973	gene	315
AIPAKLKF_00973	CDS	315				hypothetical protein
AIPAKLKF_00974	gene	570
AIPAKLKF_00974	CDS	570				hypothetical protein
AIPAKLKF_00975	gene	84
AIPAKLKF_00975	tRNA	84				tRNA-Leu(taa)
AIPAKLKF_00976	gene	75
AIPAKLKF_00976	tRNA	75				tRNA-Val(tac)
AIPAKLKF_00977	gene	76
AIPAKLKF_00977	tRNA	76				tRNA-Asp(gtc)
AIPAKLKF_00978	gene	71
AIPAKLKF_00978	tRNA	71				tRNA-Gly(tcc)
AIPAKLKF_00979	gene	73
AIPAKLKF_00979	tRNA	73				tRNA-Phe(gaa)
AIPAKLKF_00980	gene	84
AIPAKLKF_00980	tRNA	84				tRNA-Leu(taa)
AIPAKLKF_00981	gene	75
AIPAKLKF_00981	tRNA	75				tRNA-Val(tac)
AIPAKLKF_00982	gene	1029	mreB_1
AIPAKLKF_00982	CDS	1029	mreB_1		COG1077	Cell shape-determining protein MreB
AIPAKLKF_00983	gene	849	mreC
AIPAKLKF_00983	CDS	849	mreC		COG1792	Cell shape-determining protein MreC
AIPAKLKF_00984	gene	519
AIPAKLKF_00984	CDS	519				hypothetical protein
AIPAKLKF_00985	gene	2580	mrdA
AIPAKLKF_00985	CDS	2580	mrdA	3.4.16.4		Peptidoglycan D,D-transpeptidase MrdA
AIPAKLKF_00986	gene	663	minC
AIPAKLKF_00986	CDS	663	minC		COG0850	Septum site-determining protein MinC
AIPAKLKF_00987	gene	792	minD
AIPAKLKF_00987	CDS	792	minD		COG2894	Septum site-determining protein MinD
AIPAKLKF_00988	gene	270	minE
AIPAKLKF_00988	CDS	270	minE			Cell division topological specificity factor
AIPAKLKF_00989	gene	1176	mrdB_1
AIPAKLKF_00989	CDS	1176	mrdB_1	2.4.1.129	COG0772	Peptidoglycan glycosyltransferase MrdB
AIPAKLKF_00990	gene	390	mgsA
AIPAKLKF_00990	CDS	390	mgsA	4.2.3.3	COG1803	Methylglyoxal synthase
AIPAKLKF_00991	gene	471
AIPAKLKF_00991	CDS	471				hypothetical protein
	repeat_region	308
AIPAKLKF_00992	gene	105
AIPAKLKF_00992	CDS	105				hypothetical protein
AIPAKLKF_00993	gene	777	sigG
AIPAKLKF_00993	CDS	777	sigG		COG1191	RNA polymerase sigma-G factor
AIPAKLKF_00994	gene	1302
AIPAKLKF_00994	CDS	1302				hypothetical protein
AIPAKLKF_00995	gene	825	ngcF
AIPAKLKF_00995	CDS	825	ngcF		COG1175	Diacetylchitobiose uptake system permease protein NgcF
AIPAKLKF_00996	gene	837	ngcG
AIPAKLKF_00996	CDS	837	ngcG		COG0395	Diacetylchitobiose uptake system permease protein NgcG
AIPAKLKF_00997	gene	1488	nagZ
AIPAKLKF_00997	CDS	1488	nagZ	3.2.1.52		Beta-hexosaminidase
AIPAKLKF_00998	gene	414
[truncated: 923 more rows]

## Sheet: Supplementary Table 10
M_TAG_MAG_00001_prokka
locus_tag	ftype	length_bp	gene	EC_number	COG	product
CFCLHDKO_00001	gene	1428
CFCLHDKO_00001	CDS	1428				hypothetical protein
CFCLHDKO_00002	gene	1302	aroA
CFCLHDKO_00002	CDS	1302	aroA	2.5.1.19	COG0128	3-phosphoshikimate 1-carboxyvinyltransferase
CFCLHDKO_00003	gene	267
CFCLHDKO_00003	CDS	267				hypothetical protein
CFCLHDKO_00004	gene	1077	aroC
CFCLHDKO_00004	CDS	1077	aroC	4.2.3.5	COG0082	Chorismate synthase
CFCLHDKO_00005	gene	1014	aroB
CFCLHDKO_00005	CDS	1014	aroB	4.2.3.4	COG0337	3-dehydroquinate synthase
CFCLHDKO_00006	gene	447	aroQ
CFCLHDKO_00006	CDS	447	aroQ	4.2.1.10	COG0757	3-dehydroquinate dehydratase
CFCLHDKO_00007	gene	1260	aroE
CFCLHDKO_00007	CDS	1260	aroE	1.1.1.25		Shikimate dehydrogenase (NADP(+))
CFCLHDKO_00008	gene	405	larC_1
CFCLHDKO_00008	CDS	405	larC_1	4.99.1.12		Pyridinium-3,5-bisthiocarboxylic acid mononucleotide nickel insertion protein
CFCLHDKO_00009	gene	810	larC_2
CFCLHDKO_00009	CDS	810	larC_2	4.99.1.12		Pyridinium-3,5-bisthiocarboxylic acid mononucleotide nickel insertion protein
CFCLHDKO_00010	gene	765	larB
CFCLHDKO_00010	CDS	765	larB	2.5.1.143	COG1691	Pyridinium-3,5-biscarboxylic acid mononucleotide synthase
CFCLHDKO_00011	gene	807	larE
CFCLHDKO_00011	CDS	807	larE	4.4.1.37	COG1606	Pyridinium-3,5-bisthiocarboxylic acid mononucleotide synthase
CFCLHDKO_00012	gene	786	fetB
CFCLHDKO_00012	CDS	786	fetB		COG0390	putative iron export permease protein FetB
CFCLHDKO_00013	gene	609	glnQ_1
CFCLHDKO_00013	CDS	609	glnQ_1			Glutamine transport ATP-binding protein GlnQ
CFCLHDKO_00014	gene	831	tepA
CFCLHDKO_00014	CDS	831	tepA		COG0740	Translocation-enhancing protein TepA
CFCLHDKO_00015	gene	519
CFCLHDKO_00015	CDS	519				hypothetical protein
CFCLHDKO_00016	gene	372	rplL
CFCLHDKO_00016	CDS	372	rplL			50S ribosomal protein L7/L12
CFCLHDKO_00017	gene	501	rplJ
CFCLHDKO_00017	CDS	501	rplJ			50S ribosomal protein L10
CFCLHDKO_00018	gene	696	rplA
CFCLHDKO_00018	CDS	696	rplA			50S ribosomal protein L1
CFCLHDKO_00019	gene	426	rplK
CFCLHDKO_00019	CDS	426	rplK		COG0080	50S ribosomal protein L11
CFCLHDKO_00020	gene	519	nusG
CFCLHDKO_00020	CDS	519	nusG			Transcription termination/antitermination protein NusG
CFCLHDKO_00021	gene	195	secE
CFCLHDKO_00021	CDS	195	secE			Protein translocase subunit SecE
CFCLHDKO_00022	gene	81
CFCLHDKO_00022	tRNA	81				tRNA-Leu(tag)
	repeat_region	564
CFCLHDKO_00023	gene	1809	lepA
CFCLHDKO_00023	CDS	1809	lepA	3.6.5.-		Elongation factor 4
CFCLHDKO_00024	gene	1119	hemW
CFCLHDKO_00024	CDS	1119	hemW		COG0635	Heme chaperone HemW
CFCLHDKO_00025	gene	657	rluC_1
CFCLHDKO_00025	CDS	657	rluC_1	5.4.99.24	COG0564	Ribosomal large subunit pseudouridine synthase C
CFCLHDKO_00026	gene	762	rnhB
CFCLHDKO_00026	CDS	762	rnhB	3.1.26.4	COG0164	Ribonuclease HII
CFCLHDKO_00027	gene	270	flhB_1
CFCLHDKO_00027	CDS	270	flhB_1		COG1377	Flagellar biosynthetic protein FlhB
CFCLHDKO_00028	gene	351
CFCLHDKO_00028	CDS	351				hypothetical protein
CFCLHDKO_00029	gene	1323	der
CFCLHDKO_00029	CDS	1323	der			GTPase Der
CFCLHDKO_00030	gene	600	plsY
CFCLHDKO_00030	CDS	600	plsY	2.3.1.275	COG0344	Glycerol-3-phosphate acyltransferase
CFCLHDKO_00031	gene	993	gpsA
CFCLHDKO_00031	CDS	993	gpsA	1.1.1.94		Glycerol-3-phosphate dehydrogenase [NAD(P)+]
CFCLHDKO_00032	gene	1284	adeQ
CFCLHDKO_00032	CDS	1284	adeQ		COG2252	Adenine permease AdeQ
CFCLHDKO_00033	gene	3858	rpoB
CFCLHDKO_00033	CDS	3858	rpoB	2.7.7.6	COG0085	DNA-directed RNA polymerase subunit beta
CFCLHDKO_00034	gene	3645	rpoC
CFCLHDKO_00034	CDS	3645	rpoC	2.7.7.6	COG0086	DNA-directed RNA polymerase subunit beta'
CFCLHDKO_00035	gene	1542	abgT
CFCLHDKO_00035	CDS	1542	abgT		COG2978	p-aminobenzoyl-glutamate transport protein
CFCLHDKO_00036	gene	1383	tldD_1
CFCLHDKO_00036	CDS	1383	tldD_1	3.4.-.-	COG0312	Metalloprotease TldD
CFCLHDKO_00037	gene	1350	tldD_2
CFCLHDKO_00037	CDS	1350	tldD_2	3.4.-.-	COG0312	Metalloprotease TldD
CFCLHDKO_00038	gene	603	ruvA
CFCLHDKO_00038	CDS	603	ruvA	3.6.4.12	COG0632	Holliday junction ATP-dependent DNA helicase RuvA
CFCLHDKO_00039	gene	1029	ruvB
CFCLHDKO_00039	CDS	1029	ruvB	3.6.4.12	COG2255	Holliday junction ATP-dependent DNA helicase RuvB
CFCLHDKO_00040	gene	924	ppaC
CFCLHDKO_00040	CDS	924	ppaC	3.6.1.1	COG1227	Manganese-dependent inorganic pyrophosphatase
CFCLHDKO_00041	gene	567	glpG
CFCLHDKO_00041	CDS	567	glpG	3.4.21.105		Rhomboid protease GlpG
CFCLHDKO_00042	gene	315
CFCLHDKO_00042	CDS	315				hypothetical protein
CFCLHDKO_00043	gene	831
CFCLHDKO_00043	CDS	831				hypothetical protein
CFCLHDKO_00044	gene	2640	ppdK
CFCLHDKO_00044	CDS	2640	ppdK	2.7.9.1	COG0574	Pyruvate, phosphate dikinase
CFCLHDKO_00045	gene	1764
CFCLHDKO_00045	CDS	1764				hypothetical protein
CFCLHDKO_00046	gene	1383	recF_1
CFCLHDKO_00046	CDS	1383	recF_1			DNA replication and repair protein RecF
CFCLHDKO_00047	gene	681
CFCLHDKO_00047	CDS	681				hypothetical protein
CFCLHDKO_00048	gene	606
CFCLHDKO_00048	CDS	606				hypothetical protein
CFCLHDKO_00049	gene	573
CFCLHDKO_00049	CDS	573				hypothetical protein
CFCLHDKO_00050	gene	1839	yjcD
CFCLHDKO_00050	CDS	1839	yjcD	3.6.4.12	COG0210	Putative ATP-dependent DNA helicase YjcD
CFCLHDKO_00051	gene	126
CFCLHDKO_00051	CDS	126				hypothetical protein
CFCLHDKO_00052	gene	1890
CFCLHDKO_00052	CDS	1890				hypothetical protein
CFCLHDKO_00053	gene	1599
CFCLHDKO_00053	CDS	1599				hypothetical protein
CFCLHDKO_00054	gene	726	divIB
CFCLHDKO_00054	CDS	726	divIB			Cell division protein DivIB
CFCLHDKO_00055	gene	1347	ftsZ
CFCLHDKO_00055	CDS	1347	ftsZ			Cell division protein FtsZ
CFCLHDKO_00056	gene	900	hexR
CFCLHDKO_00056	CDS	900	hexR		COG1737	HTH-type transcriptional regulator HexR
CFCLHDKO_00057	gene	1227	baiN
CFCLHDKO_00057	CDS	1227	baiN	1.3.1.114	COG2081	3-dehydro-bile acid delta(4,6)-reductase
CFCLHDKO_00058	gene	672	cmk
CFCLHDKO_00058	CDS	672	cmk	2.7.4.25	COG0283	Cytidylate kinase
CFCLHDKO_00059	gene	1935	ispH
CFCLHDKO_00059	CDS	1935	ispH	1.17.7.4		4-hydroxy-3-methylbut-2-enyl diphosphate reductase
CFCLHDKO_00060	gene	156
CFCLHDKO_00060	CDS	156				hypothetical protein
CFCLHDKO_00061	gene	2016	rtpR
CFCLHDKO_00061	CDS	2016	rtpR	1.17.4.2		Adenosylcobalamin-dependent ribonucleoside-triphosphate reductase
CFCLHDKO_00062	gene	504	dut
CFCLHDKO_00062	CDS	504	dut	3.6.1.23		Deoxyuridine 5'-triphosphate nucleotidohydrolase
CFCLHDKO_00063	gene	2637	valS
CFCLHDKO_00063	CDS	2637	valS	6.1.1.9	COG0525	Valine--tRNA ligase
CFCLHDKO_00064	gene	1425	gerAA
CFCLHDKO_00064	CDS	1425	gerAA			Spore germination protein A1
CFCLHDKO_00065	gene	1236
CFCLHDKO_00065	CDS	1236		3.4.11.-		Aminopeptidase 2
CFCLHDKO_00066	gene	315
CFCLHDKO_00066	CDS	315				hypothetical protein
CFCLHDKO_00067	gene	1203
CFCLHDKO_00067	CDS	1203				hypothetical protein
CFCLHDKO_00068	gene	2100	pgpH
CFCLHDKO_00068	CDS	2100	pgpH	3.1.4.59		Cyclic-di-AMP phosphodiesterase PgpH
CFCLHDKO_00069	gene	453	ybeY
CFCLHDKO_00069	CDS	453	ybeY	3.1.-.-		Endoribonuclease YbeY
CFCLHDKO_00070	gene	384	cdd
CFCLHDKO_00070	CDS	384	cdd	3.5.4.5	COG0295	Cytidine deaminase
CFCLHDKO_00071	gene	912	era
CFCLHDKO_00071	CDS	912	era		COG1159	GTPase Era
CFCLHDKO_00072	gene	156
CFCLHDKO_00072	CDS	156				hypothetical protein
CFCLHDKO_00073	gene	438
CFCLHDKO_00073	CDS	438				hypothetical protein
CFCLHDKO_00074	gene	453	tadA
CFCLHDKO_00074	CDS	453	tadA	3.5.4.33	COG0590	tRNA-specific adenosine deaminase
CFCLHDKO_00075	gene	507	infC
CFCLHDKO_00075	CDS	507	infC			Translation initiation factor IF-3
CFCLHDKO_00076	gene	198	rpmI
CFCLHDKO_00076	CDS	198	rpmI		COG0291	50S ribosomal protein L35
CFCLHDKO_00077	gene	360	rplT
CFCLHDKO_00077	CDS	360	rplT		COG0292	50S ribosomal protein L20
CFCLHDKO_00078	gene	1608	ybiT
CFCLHDKO_00078	CDS	1608	ybiT		COG0488	putative ABC transporter ATP-binding protein YbiT
CFCLHDKO_00079	gene	636
CFCLHDKO_00079	CDS	636				hypothetical protein
CFCLHDKO_00080	gene	1773	pepF1_1
CFCLHDKO_00080	CDS	1773	pepF1_1	3.4.24.-		Oligoendopeptidase F, plasmid
CFCLHDKO_00081	gene	2538
CFCLHDKO_00081	CDS	2538				hypothetical protein
CFCLHDKO_00082	gene	234	grdB_1
CFCLHDKO_00082	CDS	234	grdB_1	1.21.4.2		Glycine reductase complex component B subunit gamma
CFCLHDKO_00083	gene	1047	grdB_2
CFCLHDKO_00083	CDS	1047	grdB_2	1.21.4.2		Glycine reductase complex component B subunit gamma
CFCLHDKO_00084	gene	324	grdA1
CFCLHDKO_00084	CDS	324	grdA1	1.21.4.2		Glycine/sarcosine/betaine reductase complex component A1
CFCLHDKO_00085	gene	132	grdA
CFCLHDKO_00085	CDS	132	grdA	1.21.4.2		Glycine/sarcosine/betaine reductase complex component A
CFCLHDKO_00086	gene	1287	grdE
CFCLHDKO_00086	CDS	1287	grdE	1.21.4.2		Glycine reductase complex component B subunits alpha and beta
CFCLHDKO_00087	gene	321	trxA
CFCLHDKO_00087	CDS	321	trxA		COG0526	Thioredoxin
CFCLHDKO_00088	gene	942	trxB_1
CFCLHDKO_00088	CDS	942	trxB_1	1.8.1.9		Thioredoxin reductase
CFCLHDKO_00089	gene	366
CFCLHDKO_00089	CDS	366				hypothetical protein
CFCLHDKO_00090	gene	1881	selB
CFCLHDKO_00090	CDS	1881	selB		COG3276	Selenocysteine-specific elongation factor
CFCLHDKO_00091	gene	96
CFCLHDKO_00091	tRNA	96				tRNA-SeC(tca)
CFCLHDKO_00092	gene	1176	selA
CFCLHDKO_00092	CDS	1176	selA	2.9.1.1	COG1921	L-seryl-tRNA(Sec) selenium transferase
CFCLHDKO_00093	gene	318
CFCLHDKO_00093	CDS	318				hypothetical protein
CFCLHDKO_00094	gene	1116	csd
CFCLHDKO_00094	CDS	1116	csd	2.8.1.7		putative cysteine desulfurase
CFCLHDKO_00095	gene	963	selD
CFCLHDKO_00095	CDS	963	selD	2.7.9.3	COG0709	Selenide, water dikinase
CFCLHDKO_00096	gene	573
CFCLHDKO_00096	CDS	573				hypothetical protein
CFCLHDKO_00097	gene	249
CFCLHDKO_00097	CDS	249				hypothetical protein
CFCLHDKO_00098	gene	1026
CFCLHDKO_00098	CDS	1026				hypothetical protein
CFCLHDKO_00099	gene	2223	pyrK
CFCLHDKO_00099	CDS	2223	pyrK			Dihydroorotate dehydrogenase B (NAD(+)), electron transfer subunit
CFCLHDKO_00100	gene	849	ywpJ
CFCLHDKO_00100	CDS	849	ywpJ	3.1.3.-	COG0561	Phosphatase YwpJ
CFCLHDKO_00101	gene	1026	ltaA
CFCLHDKO_00101	CDS	1026	ltaA	4.1.2.49		L-allo-threonine aldolase
CFCLHDKO_00102	gene	4542
CFCLHDKO_00102	CDS	4542				hypothetical protein
CFCLHDKO_00103	gene	1113
CFCLHDKO_00103	CDS	1113		1.8.98.-	COG0641	Anaerobic sulfatase-maturating enzyme
CFCLHDKO_00104	gene	1350	yagG
CFCLHDKO_00104	CDS	1350	yagG		COG2211	Putative glycoside/cation symporter YagG
CFCLHDKO_00105	gene	1785
CFCLHDKO_00105	CDS	1785				hypothetical protein
CFCLHDKO_00106	gene	1722	nag3_1
CFCLHDKO_00106	CDS	1722	nag3_1	3.2.1.21	COG1472	Beta-N-acetylglucosaminidase/beta-glucosidase
CFCLHDKO_00107	gene	645	yvdM
CFCLHDKO_00107	CDS	645	yvdM	5.4.2.6	COG0637	Beta-phosphoglucomutase
CFCLHDKO_00108	gene	2511	rhaS
CFCLHDKO_00108	CDS	2511	rhaS			HTH-type transcriptional activator RhaS
	repeat_region	564
CFCLHDKO_00109	gene	2016
CFCLHDKO_00109	CDS	2016				hypothetical protein
CFCLHDKO_00110	gene	114
CFCLHDKO_00110	CDS	114				hypothetical protein
CFCLHDKO_00111	gene	309
CFCLHDKO_00111	CDS	309				hypothetical protein
CFCLHDKO_00112	gene	1824
CFCLHDKO_00112	CDS	1824				hypothetical protein
CFCLHDKO_00113	gene	1344	rsmB
CFCLHDKO_00113	CDS	1344	rsmB	2.1.1.176	COG0144	Ribosomal RNA small subunit methyltransferase B
CFCLHDKO_00114	gene	1029	rlmN
CFCLHDKO_00114	CDS	1029	rlmN	2.1.1.192		putative dual-specificity RNA methyltransferase RlmN
CFCLHDKO_00115	gene	726	stp
CFCLHDKO_00115	CDS	726	stp	3.1.3.16	COG0631	Serine/threonine phosphatase stp
CFCLHDKO_00116	gene	2079	prkC
CFCLHDKO_00116	CDS	2079	prkC	2.7.11.1	COG0515	Serine/threonine-protein kinase PrkC
CFCLHDKO_00117	gene	882	rsgA
CFCLHDKO_00117	CDS	882	rsgA	3.6.1.-	COG1162	Small ribosomal subunit biogenesis GTPase RsgA
CFCLHDKO_00118	gene	651	rpe
CFCLHDKO_00118	CDS	651	rpe	5.1.3.1		Ribulose-phosphate 3-epimerase
CFCLHDKO_00119	gene	669	thiN
CFCLHDKO_00119	CDS	669	thiN	2.7.6.2	COG1564	Thiamine pyrophosphokinase
CFCLHDKO_00120	gene	1260
CFCLHDKO_00120	CDS	1260				hypothetical protein
CFCLHDKO_00121	gene	207
CFCLHDKO_00121	CDS	207				hypothetical protein
CFCLHDKO_00122	gene	714	fabG_1
CFCLHDKO_00122	CDS	714	fabG_1	1.1.1.100		3-oxoacyl-[acyl-carrier-protein] reductase FabG
CFCLHDKO_00123	gene	1194	thlA
CFCLHDKO_00123	CDS	1194	thlA	2.3.1.9	COG0183	Acetyl-CoA acetyltransferase
CFCLHDKO_00124	gene	5124
CFCLHDKO_00124	CDS	5124				hypothetical protein
CFCLHDKO_00125	gene	336
CFCLHDKO_00125	CDS	336				hypothetical protein
CFCLHDKO_00126	gene	1281
CFCLHDKO_00126	CDS	1281				hypothetical protein
CFCLHDKO_00127	gene	1401	mepA_1
CFCLHDKO_00127	CDS	1401	mepA_1		COG0534	Multidrug export protein MepA
CFCLHDKO_00128	gene	1311	mtaB_1
CFCLHDKO_00128	CDS	1311	mtaB_1	2.8.4.5	COG0621	Threonylcarbamoyladenosine tRNA methylthiotransferase MtaB
CFCLHDKO_00129	gene	261
CFCLHDKO_00129	CDS	261				hypothetical protein
CFCLHDKO_00130	gene	435	yrrK
CFCLHDKO_00130	CDS	435	yrrK	3.1.-.-	COG0816	Putative pre-16S rRNA nuclease
CFCLHDKO_00131	gene	291
CFCLHDKO_00131	CDS	291				hypothetical protein
CFCLHDKO_00132	gene	1665	rnjA
CFCLHDKO_00132	CDS	1665	rnjA	3.1.-.-	COG0595	Ribonuclease J1
CFCLHDKO_00133	gene	3285	cas9-1
CFCLHDKO_00133	CDS	3285	cas9-1	3.1.-.-		CRISPR-associated endonuclease Cas9 1
CFCLHDKO_00134	gene	924	cas1
CFCLHDKO_00134	CDS	924	cas1	3.1.-.-		CRISPR-associated endonuclease Cas1
CFCLHDKO_00135	gene	351	cas2
CFCLHDKO_00135	CDS	351	cas2	3.1.-.-		CRISPR-associated endoribonuclease Cas2
CFCLHDKO_00136	gene	1017
CFCLHDKO_00136	CDS	1017				hypothetical protein
CFCLHDKO_00137	gene	288
CFCLHDKO_00137	CDS	288				hypothetical protein
CFCLHDKO_00138	gene	180
CFCLHDKO_00138	CDS	180				hypothetical protein
CFCLHDKO_00139	gene	189
CFCLHDKO_00139	CDS	189				hypothetical protein
CFCLHDKO_00140	gene	114
CFCLHDKO_00140	CDS	114				hypothetical protein
CFCLHDKO_00141	gene	1734	hndD
CFCLHDKO_00141	CDS	1734	hndD	1.12.1.3	COG3383	NADP-reducing hydrogenase subunit HndD
CFCLHDKO_00142	gene	1794	hndC
CFCLHDKO_00142	CDS	1794	hndC	1.12.1.3	COG1145	NADP-reducing hydrogenase subunit HndC
CFCLHDKO_00143	gene	501	hndA
CFCLHDKO_00143	CDS	501	hndA	1.12.1.3	COG1905	NADP-reducing hydrogenase subunit HndA
CFCLHDKO_00144	gene	1107
CFCLHDKO_00144	CDS	1107		1.8.-.-	COG0502	[FeFe] hydrogenase maturase subunit HydE
CFCLHDKO_00145	gene	405
CFCLHDKO_00145	CDS	405				hypothetical protein
CFCLHDKO_00146	gene	879
CFCLHDKO_00146	CDS	879				hypothetical protein
CFCLHDKO_00147	gene	723
CFCLHDKO_00147	CDS	723				hypothetical protein
CFCLHDKO_00148	gene	630	yxlF
CFCLHDKO_00148	CDS	630	yxlF	3.6.3.-	COG1131	putative ABC transporter ATP-binding protein YxlF
CFCLHDKO_00149	gene	1380	mqnC
CFCLHDKO_00149	CDS	1380	mqnC	1.21.98.1		Cyclic dehypoxanthine futalosine synthase
CFCLHDKO_00150	gene	1200	mnmE_1
CFCLHDKO_00150	CDS	1200	mnmE_1	3.6.-.-		tRNA modification GTPase MnmE
CFCLHDKO_00151	gene	846	dpnM
CFCLHDKO_00151	CDS	846	dpnM	2.1.1.72		Modification methylase DpnIIA
CFCLHDKO_00152	gene	1287
CFCLHDKO_00152	CDS	1287				hypothetical protein
CFCLHDKO_00153	gene	312
CFCLHDKO_00153	CDS	312				hypothetical protein
CFCLHDKO_00154	gene	1359
CFCLHDKO_00154	CDS	1359				hypothetical protein
CFCLHDKO_00155	gene	1359
CFCLHDKO_00155	CDS	1359				hypothetical protein
CFCLHDKO_00156	gene	1218	arcA
CFCLHDKO_00156	CDS	1218	arcA	3.5.3.6		Arginine deiminase
CFCLHDKO_00157	gene	1608	rocB
CFCLHDKO_00157	CDS	1608	rocB		COG4187	Protein RocB
CFCLHDKO_00158	gene	1131	alr1
CFCLHDKO_00158	CDS	1131	alr1	5.1.1.1	COG0787	Alanine racemase 1
CFCLHDKO_00159	gene	1059	ord
CFCLHDKO_00159	CDS	1059	ord	1.4.1.12	COG3804	2,4-diaminopentanoate dehydrogenase
CFCLHDKO_00160	gene	291	ortA
CFCLHDKO_00160	CDS	291	ortA	2.3.1.263		2-amino-4-ketopentanoate thiolase alpha subunit
CFCLHDKO_00161	gene	1404	ortB
CFCLHDKO_00161	CDS	1404	ortB	2.3.1.263		2-amino-4-ketopentanoate thiolase beta subunit
CFCLHDKO_00162	gene	351	oraS
CFCLHDKO_00162	CDS	351	oraS	5.4.3.5		D-ornithine 4,5-aminomutase subunit alpha
CFCLHDKO_00163	gene	2190	oraE
CFCLHDKO_00163	CDS	2190	oraE	5.4.3.5		D-ornithine 4,5-aminomutase subunit beta
CFCLHDKO_00164	gene	1341
CFCLHDKO_00164	CDS	1341				hypothetical protein
CFCLHDKO_00165	gene	1062	orr
CFCLHDKO_00165	CDS	1062	orr	5.1.1.12	COG3457	Ornithine racemase
CFCLHDKO_00166	gene	1119
CFCLHDKO_00166	CDS	1119				hypothetical protein
CFCLHDKO_00167	gene	1323
CFCLHDKO_00167	CDS	1323				hypothetical protein
CFCLHDKO_00168	gene	651	gchK
CFCLHDKO_00168	CDS	651	gchK	2.7.13.3	COG0642	Globin-coupled histidine kinase
CFCLHDKO_00169	gene	324
CFCLHDKO_00169	CDS	324				hypothetical protein
CFCLHDKO_00170	gene	1257
CFCLHDKO_00170	CDS	1257				hypothetical protein
CFCLHDKO_00171	gene	1584
CFCLHDKO_00171	CDS	1584				hypothetical protein
CFCLHDKO_00172	gene	1659
CFCLHDKO_00172	CDS	1659				hypothetical protein
CFCLHDKO_00173	gene	876	asnO
CFCLHDKO_00173	CDS	876	asnO	6.3.5.4	COG0367	Asparagine synthetase [glutamine-hydrolyzing] 3
CFCLHDKO_00174	gene	2025	hutU
CFCLHDKO_00174	CDS	2025	hutU	4.2.1.49		Urocanate hydratase
CFCLHDKO_00175	gene	897
CFCLHDKO_00175	CDS	897		2.1.2.5	COG3643	Glutamate formimidoyltransferase
CFCLHDKO_00176	gene	1230	hutI
CFCLHDKO_00176	CDS	1230	hutI	3.5.2.7	COG1228	Imidazolonepropionase
CFCLHDKO_00177	gene	627	fchA
CFCLHDKO_00177	CDS	627	fchA	3.5.4.9	COG3404	Methenyltetrahydrofolate cyclohydrolase
CFCLHDKO_00178	gene	1533	hutH
CFCLHDKO_00178	CDS	1533	hutH	4.3.1.3	COG2986	Histidine ammonia-lyase
CFCLHDKO_00179	gene	918	lacC
CFCLHDKO_00179	CDS	918	lacC	2.7.1.144	COG1105	Tagatose-6-phosphate kinase
CFCLHDKO_00180	gene	1005	oppD_1
CFCLHDKO_00180	CDS	1005	oppD_1		COG0444	Oligopeptide transport ATP-binding protein OppD
CFCLHDKO_00181	gene	936	oppF_1
CFCLHDKO_00181	CDS	936	oppF_1		COG4608	Oligopeptide transport ATP-binding protein OppF
CFCLHDKO_00182	gene	975	dppB
CFCLHDKO_00182	CDS	975	dppB		COG0601	Dipeptide transport system permease protein DppB
CFCLHDKO_00183	gene	870
CFCLHDKO_00183	CDS	870			COG1173	Putative peptide transport permease protein
CFCLHDKO_00184	gene	1833
CFCLHDKO_00184	CDS	1833				hypothetical protein
CFCLHDKO_00185	gene	1230
CFCLHDKO_00185	CDS	1230		3.4.24.-	COG0612	putative zinc protease
CFCLHDKO_00186	gene	435
CFCLHDKO_00186	CDS	435				hypothetical protein
CFCLHDKO_00187	gene	351
CFCLHDKO_00187	CDS	351				hypothetical protein
CFCLHDKO_00188	gene	216
CFCLHDKO_00188	CDS	216				hypothetical protein
CFCLHDKO_00189	gene	1905	feoB
CFCLHDKO_00189	CDS	1905	feoB		COG0370	Fe(2+) transporter FeoB
CFCLHDKO_00190	gene	147
CFCLHDKO_00190	CDS	147				hypothetical protein
CFCLHDKO_00191	gene	759
CFCLHDKO_00191	CDS	759				hypothetical protein
CFCLHDKO_00192	gene	579
CFCLHDKO_00192	CDS	579				hypothetical protein
CFCLHDKO_00193	gene	117
CFCLHDKO_00193	CDS	117				hypothetical protein
CFCLHDKO_00194	gene	321	rimP
CFCLHDKO_00194	CDS	321	rimP			Ribosome maturation factor RimP
CFCLHDKO_00195	gene	1095	nusA
CFCLHDKO_00195	CDS	1095	nusA		COG0195	Transcription termination/antitermination protein NusA
CFCLHDKO_00196	gene	267
CFCLHDKO_00196	CDS	267				hypothetical protein
CFCLHDKO_00197	gene	318	rplGA
CFCLHDKO_00197	CDS	318	rplGA		COG1358	putative ribosomal protein YlxQ
CFCLHDKO_00198	gene	2013	infB
CFCLHDKO_00198	CDS	2013	infB			Translation initiation factor IF-2
CFCLHDKO_00199	gene	345	rbfA
CFCLHDKO_00199	CDS	345	rbfA		COG0858	30S ribosome-binding factor
CFCLHDKO_00200	gene	969	nrnA
CFCLHDKO_00200	CDS	969	nrnA	3.1.-.-	COG0618	Bifunctional oligoribonuclease and PAP phosphatase NrnA
CFCLHDKO_00201	gene	900	truB
CFCLHDKO_00201	CDS	900	truB	5.4.99.25		tRNA pseudouridine synthase B
CFCLHDKO_00202	gene	915	ribF
CFCLHDKO_00202	CDS	915	ribF		COG0196	Bifunctional riboflavin kinase/FMN adenylyltransferase
CFCLHDKO_00203	gene	651	nth
CFCLHDKO_00203	CDS	651	nth	4.2.99.18	COG0177	Endonuclease III
CFCLHDKO_00204	gene	1980	gyrB_1
CFCLHDKO_00204	CDS	1980	gyrB_1	5.6.2.2		DNA gyrase subunit B
CFCLHDKO_00205	gene	2079	gyrA_1
CFCLHDKO_00205	CDS	2079	gyrA_1	5.6.2.2	COG0188	DNA gyrase subunit A
CFCLHDKO_00206	gene	1782
CFCLHDKO_00206	CDS	1782		1.18.1.2		Ferredoxin--NADP reductase
CFCLHDKO_00207	gene	768
CFCLHDKO_00207	CDS	768				hypothetical protein
CFCLHDKO_00208	gene	693	ydjZ
CFCLHDKO_00208	CDS	693	ydjZ		COG0398	TVP38/TMEM64 family inner membrane protein YdjZ
CFCLHDKO_00209	gene	1047
CFCLHDKO_00209	CDS	1047				hypothetical protein
CFCLHDKO_00210	gene	597	ynjF
CFCLHDKO_00210	CDS	597	ynjF		COG0558	Inner membrane protein YnjF
CFCLHDKO_00211	gene	1167	ynjB
CFCLHDKO_00211	CDS	1167	ynjB		COG4134	Protein YnjB
CFCLHDKO_00212	gene	891	potH
CFCLHDKO_00212	CDS	891	potH		COG1176	Putrescine transport system permease protein PotH
CFCLHDKO_00213	gene	786
CFCLHDKO_00213	CDS	786				hypothetical protein
CFCLHDKO_00214	gene	1005	btuD_1
CFCLHDKO_00214	CDS	1005	btuD_1	7.6.2.8		Vitamin B12 import ATP-binding protein BtuD
CFCLHDKO_00215	gene	942	ykfA
CFCLHDKO_00215	CDS	942	ykfA	3.4.16.-	COG1619	putative murein peptide carboxypeptidase
CFCLHDKO_00216	gene	1119	hipO
CFCLHDKO_00216	CDS	1119	hipO	3.5.1.32	COG1473	Hippurate hydrolase
CFCLHDKO_00217	gene	951
CFCLHDKO_00217	CDS	951				hypothetical protein
CFCLHDKO_00218	gene	1839
CFCLHDKO_00218	CDS	1839				hypothetical protein
CFCLHDKO_00219	gene	1278	davT
CFCLHDKO_00219	CDS	1278	davT	2.6.1.48	COG0160	5-aminovalerate aminotransferase DavT
CFCLHDKO_00220	gene	852	srtB
CFCLHDKO_00220	CDS	852	srtB	3.4.22.-	COG4509	Sortase B
CFCLHDKO_00221	gene	591	comEA
CFCLHDKO_00221	CDS	591	comEA		COG1555	ComE operon protein 1
CFCLHDKO_00222	gene	693	walR_1
CFCLHDKO_00222	CDS	693	walR_1		COG0745	Transcriptional regulatory protein WalR
CFCLHDKO_00223	gene	1422	rcsC
CFCLHDKO_00223	CDS	1422	rcsC	2.7.13.3		Sensor histidine kinase RcsC
CFCLHDKO_00224	gene	915
CFCLHDKO_00224	CDS	915				hypothetical protein
CFCLHDKO_00225	gene	2265	comEC
CFCLHDKO_00225	CDS	2265	comEC		COG0658	ComE operon protein 3
CFCLHDKO_00226	gene	996	yqeN
CFCLHDKO_00226	CDS	996	yqeN		COG1466	putative protein YqeN
CFCLHDKO_00227	gene	864
CFCLHDKO_00227	CDS	864				hypothetical protein
CFCLHDKO_00228	gene	285	groS
CFCLHDKO_00228	CDS	285	groS			10 kDa chaperonin
CFCLHDKO_00229	gene	1620	groL
CFCLHDKO_00229	CDS	1620	groL		COG0459	60 kDa chaperonin
CFCLHDKO_00230	gene	1347
CFCLHDKO_00230	CDS	1347		3.4.13.-		Putative dipeptidase
CFCLHDKO_00231	gene	1527
CFCLHDKO_00231	CDS	1527				hypothetical protein
CFCLHDKO_00232	gene	672	birA
CFCLHDKO_00232	CDS	672	birA	6.3.4.15	COG0340	Bifunctional ligase/repressor BirA
CFCLHDKO_00233	gene	1191	dacB
CFCLHDKO_00233	CDS	1191	dacB	3.4.16.4	COG1686	D-alanyl-D-alanine carboxypeptidase DacB
CFCLHDKO_00234	gene	1482	spoIVA
CFCLHDKO_00234	CDS	1482	spoIVA	3.6.1.3		Stage IV sporulation protein A
CFCLHDKO_00235	gene	252
CFCLHDKO_00235	CDS	252				hypothetical protein
CFCLHDKO_00236	gene	1671	fhs
CFCLHDKO_00236	CDS	1671	fhs	6.3.4.3	COG2759	Formate--tetrahydrofolate ligase
CFCLHDKO_00237	gene	681	sfsA
CFCLHDKO_00237	CDS	681	sfsA		COG1489	Sugar fermentation stimulation protein A
CFCLHDKO_00238	gene	840	rimK
CFCLHDKO_00238	CDS	840	rimK	6.3.2.-	COG0189	Ribosomal protein S6--L-glutamate ligase
CFCLHDKO_00239	gene	1209	cinA
CFCLHDKO_00239	CDS	1209	cinA		COG1058	Putative competence-damage inducible protein
CFCLHDKO_00240	gene	1026	hflK
CFCLHDKO_00240	CDS	1026	hflK		COG0330	Modulator of FtsH protease HflK
CFCLHDKO_00241	gene	873	hflC
CFCLHDKO_00241	CDS	873	hflC		COG0330	Modulator of FtsH protease HflC
CFCLHDKO_00242	gene	429
CFCLHDKO_00242	CDS	429				hypothetical protein
CFCLHDKO_00243	gene	951
CFCLHDKO_00243	CDS	951				hypothetical protein
CFCLHDKO_00244	gene	1557	spoVB
CFCLHDKO_00244	CDS	1557	spoVB		COG2244	Stage V sporulation protein B
CFCLHDKO_00245	gene	1848	uvrC
CFCLHDKO_00245	CDS	1848	uvrC		COG0322	UvrABC system protein C
CFCLHDKO_00246	gene	915	hprK
CFCLHDKO_00246	CDS	915	hprK	2.7.11.-		HPr kinase/phosphorylase
CFCLHDKO_00247	gene	951	glcK
CFCLHDKO_00247	CDS	951	glcK	2.7.1.2	COG1940	Glucokinase
CFCLHDKO_00248	gene	888	murB
CFCLHDKO_00248	CDS	888	murB	1.3.1.98	COG0812	UDP-N-acetylenolpyruvoylglucosamine reductase
CFCLHDKO_00249	gene	867	yvcJ
CFCLHDKO_00249	CDS	867	yvcJ		COG1660	Nucleotide-binding protein YvcJ
CFCLHDKO_00250	gene	900	whiA
CFCLHDKO_00250	CDS	900	whiA			cell division protein WhiA
CFCLHDKO_00251	gene	243
CFCLHDKO_00251	CDS	243				hypothetical protein
CFCLHDKO_00252	gene	903
CFCLHDKO_00252	CDS	903				hypothetical protein
CFCLHDKO_00253	gene	1845	htpG
CFCLHDKO_00253	CDS	1845	htpG		COG0326	Chaperone protein HtpG
CFCLHDKO_00254	gene	465
CFCLHDKO_00254	CDS	465				hypothetical protein
CFCLHDKO_00255	gene	1653	glnS
CFCLHDKO_00255	CDS	1653	glnS	6.1.1.18	COG0008	Glutamine--tRNA ligase
CFCLHDKO_00256	gene	1863	ubiD
CFCLHDKO_00256	CDS	1863	ubiD	4.1.1.98		3-octaprenyl-4-hydroxybenzoate carboxy-lyase
CFCLHDKO_00257	gene	876	COQ2
CFCLHDKO_00257	CDS	876	COQ2	2.5.1.39		4-hydroxybenzoate polyprenyltransferase, mitochondrial
CFCLHDKO_00258	gene	585	ecdB
CFCLHDKO_00258	CDS	585	ecdB	2.5.1.129	COG0163	putative UbiX-like flavin prenyltransferase
CFCLHDKO_00259	gene	336	glpE
CFCLHDKO_00259	CDS	336	glpE	2.8.1.1		Thiosulfate sulfurtransferase GlpE
CFCLHDKO_00260	gene	642	sigK
CFCLHDKO_00260	CDS	642	sigK			RNA polymerase sigma-28 factor
CFCLHDKO_00261	gene	624	engB
CFCLHDKO_00261	CDS	624	engB		COG0218	putative GTP-binding protein EngB
CFCLHDKO_00262	gene	393
CFCLHDKO_00262	CDS	393				hypothetical protein
CFCLHDKO_00263	gene	804
CFCLHDKO_00263	CDS	804				hypothetical protein
CFCLHDKO_00264	gene	327
CFCLHDKO_00264	CDS	327				hypothetical protein
CFCLHDKO_00265	gene	1290
CFCLHDKO_00265	CDS	1290		2.8.3.-	COG0427	Butyryl-CoA:acetate CoA-transferase
CFCLHDKO_00266	gene	2310	fadN
CFCLHDKO_00266	CDS	2310	fadN	1.1.1.35	COG1024	putative 3-hydroxyacyl-CoA dehydrogenase
CFCLHDKO_00267	gene	1179	fadA
CFCLHDKO_00267	CDS	1179	fadA	2.3.1.16	COG0183	3-ketoacyl-CoA thiolase
CFCLHDKO_00268	gene	1743
CFCLHDKO_00268	CDS	1743				hypothetical protein
CFCLHDKO_00269	gene	1125	fucO
CFCLHDKO_00269	CDS	1125	fucO	1.1.1.77	COG1454	Lactaldehyde reductase
CFCLHDKO_00270	gene	444	eutQ
CFCLHDKO_00270	CDS	444	eutQ		COG4766	Ethanolamine utilization protein EutQ
CFCLHDKO_00271	gene	1086
CFCLHDKO_00271	CDS	1086				hypothetical protein
CFCLHDKO_00272	gene	270
CFCLHDKO_00272	CDS	270				hypothetical protein
CFCLHDKO_00273	gene	231	ccmL
CFCLHDKO_00273	CDS	231	ccmL			Carbon dioxide concentrating mechanism protein CcmL
CFCLHDKO_00274	gene	573
CFCLHDKO_00274	CDS	573				hypothetical protein
CFCLHDKO_00275	gene	633	pduL
CFCLHDKO_00275	CDS	633	pduL	2.3.1.222	COG4869	Phosphate propanoyltransferase
CFCLHDKO_00276	gene	750
CFCLHDKO_00276	CDS	750				hypothetical protein
CFCLHDKO_00277	gene	1443	adhE
CFCLHDKO_00277	CDS	1443	adhE			Aldehyde-alcohol dehydrogenase
CFCLHDKO_00278	gene	513
CFCLHDKO_00278	CDS	513				hypothetical protein
CFCLHDKO_00279	gene	288	pduA
CFCLHDKO_00279	CDS	288	pduA		COG4577	Propanediol utilization protein PduA
CFCLHDKO_00280	gene	375
CFCLHDKO_00280	CDS	375				hypothetical protein
CFCLHDKO_00281	gene	654	eutL
CFCLHDKO_00281	CDS	654	eutL		COG4816	Ethanolamine utilization protein EutL
CFCLHDKO_00282	gene	870	eutC
CFCLHDKO_00282	CDS	870	eutC	4.3.1.7	COG4302	Ethanolamine ammonia-lyase light chain
CFCLHDKO_00283	gene	1362	eutB
CFCLHDKO_00283	CDS	1362	eutB	4.3.1.7	COG4303	Ethanolamine ammonia-lyase heavy chain
CFCLHDKO_00284	gene	1422
CFCLHDKO_00284	CDS	1422				hypothetical protein
CFCLHDKO_00285	gene	1380
CFCLHDKO_00285	CDS	1380				hypothetical protein
CFCLHDKO_00286	gene	579	pdtaR
CFCLHDKO_00286	CDS	579	pdtaR		COG3707	putative transcriptional regulatory protein pdtaR
CFCLHDKO_00287	gene	417	pduV
CFCLHDKO_00287	CDS	417	pduV		COG4917	Propanediol utilization protein PduV
CFCLHDKO_00288	gene	345	pduU
CFCLHDKO_00288	CDS	345	pduU		COG4810	Propanediol utilization protein PduU
CFCLHDKO_00289	gene	1353
CFCLHDKO_00289	CDS	1353				hypothetical protein
CFCLHDKO_00290	gene	1251
CFCLHDKO_00290	CDS	1251				hypothetical protein
CFCLHDKO_00291	gene	705	trmR
CFCLHDKO_00291	CDS	705	trmR	2.1.1.-	COG4122	tRNA 5-hydroxyuridine methyltransferase
CFCLHDKO_00292	gene	1065	mltG
CFCLHDKO_00292	CDS	1065	mltG	4.2.2.-		Endolytic murein transglycosylase
CFCLHDKO_00293	gene	1173	xylH
CFCLHDKO_00293	CDS	1173	xylH		COG4214	Xylose transport system permease protein XylH
CFCLHDKO_00294	gene	1515	xylG
CFCLHDKO_00294	CDS	1515	xylG	7.5.2.10	COG1129	Xylose import ATP-binding protein XylG
CFCLHDKO_00295	gene	1116	chvE
CFCLHDKO_00295	CDS	1116	chvE		COG4213	Multiple sugar-binding periplasmic receptor ChvE
CFCLHDKO_00296	gene	735	gatD
CFCLHDKO_00296	CDS	735	gatD	6.3.5.13	COG3442	Lipid II isoglutaminyl synthase (glutamine-hydrolyzing) subunit GatD
CFCLHDKO_00297	gene	1341	murT
CFCLHDKO_00297	CDS	1341	murT	6.3.5.13	COG0769	Lipid II isoglutaminyl synthase (glutamine-hydrolyzing) subunit MurT
CFCLHDKO_00298	gene	1374	yeeO
CFCLHDKO_00298	CDS	1374	yeeO		COG0534	putative FMN/FAD exporter YeeO
CFCLHDKO_00299	gene	1377	mdtK
CFCLHDKO_00299	CDS	1377	mdtK			Multidrug resistance protein MdtK
CFCLHDKO_00300	gene	71
CFCLHDKO_00300	tRNA	71				tRNA-Gly(tcc)
CFCLHDKO_00301	gene	543
CFCLHDKO_00301	CDS	543				hypothetical protein
CFCLHDKO_00302	gene	189
CFCLHDKO_00302	CDS	189				hypothetical protein
CFCLHDKO_00303	gene	1350	glmU
CFCLHDKO_00303	CDS	1350	glmU			Bifunctional protein GlmU
CFCLHDKO_00304	gene	1125	gluP
CFCLHDKO_00304	CDS	1125	gluP	3.4.21.105	COG0705	Rhomboid protease GluP
CFCLHDKO_00305	gene	1200
CFCLHDKO_00305	CDS	1200				hypothetical protein
CFCLHDKO_00306	gene	2889
CFCLHDKO_00306	CDS	2889				hypothetical protein
CFCLHDKO_00307	gene	1515
CFCLHDKO_00307	CDS	1515				hypothetical protein
CFCLHDKO_00308	gene	1611	pyrG
CFCLHDKO_00308	CDS	1611	pyrG	6.3.4.2		CTP synthase
CFCLHDKO_00309	gene	2436
CFCLHDKO_00309	CDS	2436				hypothetical protein
CFCLHDKO_00310	gene	2484
CFCLHDKO_00310	CDS	2484				hypothetical protein
CFCLHDKO_00311	gene	702	rsuA
CFCLHDKO_00311	CDS	702	rsuA	5.4.99.19	COG1187	Ribosomal small subunit pseudouridine synthase A
CFCLHDKO_00312	gene	2463	glgP
CFCLHDKO_00312	CDS	2463	glgP	2.4.1.1	COG0058	Glycogen phosphorylase
CFCLHDKO_00313	gene	2055
CFCLHDKO_00313	CDS	2055				hypothetical protein
CFCLHDKO_00314	gene	330
CFCLHDKO_00314	CDS	330				hypothetical protein
CFCLHDKO_00315	gene	1383	tilS
CFCLHDKO_00315	CDS	1383	tilS	6.3.4.19	COG0037	tRNA(Ile)-lysidine synthase
CFCLHDKO_00316	gene	528	hpt
CFCLHDKO_00316	CDS	528	hpt	2.4.2.8	COG0634	Hypoxanthine phosphoribosyltransferase
CFCLHDKO_00317	gene	2043	ftsH
CFCLHDKO_00317	CDS	2043	ftsH	3.4.24.-	COG0465	ATP-dependent zinc metalloprotease FtsH
CFCLHDKO_00318	gene	852
CFCLHDKO_00318	CDS	852				hypothetical protein
CFCLHDKO_00319	gene	1725	pgcA
CFCLHDKO_00319	CDS	1725	pgcA	5.4.2.2		Phosphoglucomutase
CFCLHDKO_00320	gene	729
CFCLHDKO_00320	CDS	729				hypothetical protein
[truncated: 2,271 more rows]

[truncated: 4 more sheets: Supplementary Table 11, Supplementary Table 12, Supplementary Table 13, Supplementary Table 14]
