# Supplementary material
Source: Research Square preprint supplement (doi:10.21203/rs.3.rs-7823722/v1)
Supplement: Supplementary file 4 [file e30edf77327ccbcf8cf0b519.docx]

## Supplementary Material 1

### Extraction and PCR protocols for juvenile metabarcoding analyses.

First, the identification of the species was confirmed through COI – *Cytochrome Oxidase I* – sequencing using DNA extracted from pleopods with the E.Z.N.A Tissue DNA® kit (Omega BIO-TEK, following the manufacturer instructions). DNA was eluted in 100 µL Elution buffer and stored at -20°C. Then, DNA amplification was performed with the specific probes *Cari-COI-1F (5′-GCAGTCTRGYGTCTTAATTTCCAC-3′) and Cari-COI-1R (5′-GCTTCTTTTTTACCRGATTCTTGTC-3*′*)*1. Amplifications were as follows: 5 minutes denaturation step at 95°C, then 35 cycles including 1 minute at 95°C (denaturation), 1 minute at 50°C (annealing) and 2 minutes at 72°C (extension), then a final elongation step of 7 minutes at 72°C. The PCR reaction mix was composed of 1X Taq Buffer (Green GoTaq® Flexi buffer, Promega), 2mM MgCl2 (Promega), 0.8 mM dNTP mix (MP Biomedicals™, LLC), 0,3 µM of each primer (Eurogentec, Liege, Belgium), 1,25 U of the Taq Polymerase (GoTaq® G2 Hot Start Polymerase, Promega) and 2 µL of pervious extracted DNA template.

PCR products were sequenced at Eurofins Genomics GmbH (Sanger Sequencing) and sequences were aligned with MUSCLE (MUltiple Sequence Comparison by Log- Expectation) algorithm (Geneious software v9). Then they were compared with three COI reference sequences of R. exoculata and R. chacei adult specimens (respectively *MT270775, MT270774, MT270776 and MT270739, MT270748, MT270708)* using the BLAST search program within the NCBI GenBank database.

Then, specimen stages from TAG and Snake Pit were identified according to the criteria defined (shape of the carapace and the rostrum, eye fusion level) in table 1 from Methou et al., 2020 [14]. Samples were defrosted and aseptically dissected on ice under a binocular microscope. DNA bacterial was extracted using the NucleoSpin Soil® kit (Macherey-Nagel) following the manufacturer instructions. DNA was eluted in 30 µL Elution buffer and stored at -20°C.16S rRNA bacterial amplification was performed using the universal primers *Whoi341 (5′-CTTTCCCTACACGACGCTCTTCCGATCTCCTACGGGNGGCWGCAG-3′) and Whoi785 (5′-GGAGTTCAGACGTGTGCTCTTCCGATCTGACTACHVGGGTATCTAATCC-3′)* with adapter or both *E8F (5′-AGAGTTTGATCATGGCTCAG-3′)* and *907R (5′-CCGTCAATTCTTTGAGTTT-3′)* and *Whoi341 (5′-CTTTCCCTACACGACGCTCTTCCGATCTCCTACGGGNGGCWGCAG-3′)* and *Whoi785 (5′-GGAGTTCAGACGTGTGCTCTTCCGATCTGACTACHVGGGTATCTAATCC-3′)* with adapter. Some samples were amplified as follows (direct PCR) : 5 minutes at 94°C, then 30 cycles including 1 minute at 94°C, 1 minute at 52°C and 1 minute 30 seconds at 72°C, and a final step of 6 minutes at 72°C. PCR reaction mix was composed of 1X Taq Buffer (10X Incubation Mix with MgCl2, MP Biomedicals™, LLC), 0.2 mM dNTP mix (MP Biomedicals™, LLC), 0,2 µM of each primer (Eurogentec, Liege, Belgium), 2,5 U of the Taq DNA Polymerase (Taq Core, MP Biomedicals™, LLC) and respectively 1 µL, 2 µL or 2 µL diluted 1/10 of DNA template. Some were performed as follows (nested PCR): 5 minutes at 95°C, then 30 cycles including 1 minute at 94°C, 1 minute 30 seconds at 49°C and 2 minutes at 72°C, and a final step of 6 minutes at 72°C. PCR reaction was composed of 1X Taq Buffer (10X Incubation Mix with MgCl2, MP Biomedicals™, LLC), 0.2 mM dNTP mix (MP Biomedicals™, LLC), 0,3 µM of each primer (Eurogentec, Liege, Belgium), 1,25 U of the Taq DNA Polymerase (Taq Core, MP Biomedicals™, LLC) and respectively 1 µL, 2 µL or 2 µL diluted 1/10 of DNA template (first amplification). Then 5 minutes at 94°C, then 20 cycles (to limit amplification of contaminants) including 1 minute at 94°C, 1 minute at 53°C and 1 minute 30 seconds at 72°C, and a final step of 6 minutes at 72°C. The PCR reaction was composed of 1X Taq Buffer (10X Incubation Mix with MgCl2, MP Biomedicals™, LLC), 0.2 mM dNTP mix (MP Biomedicals™, LLC), 0,2 µM of each primer (Eurogentec, Liege, Belgium), 2,5 U of the Taq DNA Polymerase (Taq Core, MP Biomedicals™, LLC) and 1 µL of amplicons from the first PCR (second amplification). For each experiment, 3 PCR reactions were performed, and the products were pooled before being purified with the NucleoSpin® Extract II (Macherey-Nagel) following the instruction of the manufacturer (elution in 60 µL NE buffer) and stored at -20°C. Negative PCR controls were also purified. Purified amplification products were were carried out using the Genotoul GeT PlaGe platform (INRAE, Castanet-Tolosan, France). Samples were sequenced using an Illumina MiSeq platform with a paired-end read length of 2×250 bp with chemistry V3.

** Hernández-Ávila, I. 2016. “Larval Dispersal and Life Cycle in Deep-Water Hydrothermal Vents: The Case of Rimicaris exoculata and Related Species.” PhD Thesis, Université de Bretagne Occidentale.*

## Supplementary Material 2

### PCR protocol for adult metabarcoding analyses from BICOSE2 cruise.

Amplification conditions were as follows: 1 minute at 98°C, then 35 cycles including 10 seconds at 98°C, 30 seconds at 55°C and 30 seconds at 72°C, and a final step of 6 minutes at 72°C. The PCR reaction mix was composed of 1X Phusion® High-Fidelity PCR Master Mix with GC buffer (1,5 mM MgCl2, 200 μM each dNTP final) (Thermo Scientific), 0,5 µM of each primer with Illumina half-adapter (Eurofins Genomics) and 1 U of the Phusion DNA Polymerase (Thermo Scientific).

## Supplementary Material 3

### Extraction and PCR protocols for adult metabarcoding analyses from BICOSE2014 cruise.

Specimens were aseptically dissected, and midgut tube samples were extracted with the Macherey-Nagel NucleoSpin® Soil Kit following the manufacturer instruction and using SL2 buffer for the chemical lysis. Then direct amplification of the bacterial 16S rRNA gene was done in triplicate, using “universal” primers 357F (V3 region) *5’-CCTACGGGAGGCAGCAG-3’* and 926R (V5 region) *5’-CCGTCWATTCMTTTRAGT-3’* (modified) according to the service provider's protocol (Inview Microbiome Profiling 2.0 of GATC Biotech). Each triplicate was sequenced using an Illumina HiSeq platform with a paired-end read length of 2×300 bp.

## Supplementary Material 4

### Protocol for adult metagenomic analyses.

Midgut tube from ten adult specimens (TAG and Snake Pit) were defrosted and aseptically dissected. The samples were then pooled per site before adding 1 ml of TENa-1X lysis buffer (100 mM Tris-HCl; 100 mM NaCl; 0,5 mM EDTA, pH8) and filtration 20 μm nylon filters (Millipore). The filtrated were centrifuged (9000 *g*, 15 minutes, 4°C). The pellet and the supernatant were treated separately with the same method : 500 μl of 10% Sarkosyl, 500 μl of 10% SDS, and 100 μl of proteinase K (20 mg/ml) were added before incubation at 45 °C for 3 hours. The digested samples were then centrifugated at 6000 *g* for 5 minutes and supernatants were extracted twice with cold phenol-chloroform-isoamyl alcohol (with a ratio of 24:24:1) and once with chloroform (mixed in a 1:1 ratio with lysates). The nucleic acids were precipitated overnight (2 volumes of -2°C absolute ethanol), were centrifuged during 5 minutes at 11000 *g*, air-dried and then suspended in 500 μl TE 1X (10 mM Tris-HCl, 2 mM EDTA, pH 7.5). The nucleic acids from the pellet and surnageant were pooled together and were purified with the AMPure XP kit (Amersham Biotech). Metagenomic sequencing were performed using an Illumina HiSeq3000 instrument

with a paired-end read length of 2 x 150 bp with an Illumina TruSeq Nano kit on the GeT PlaGe platform (Castanet-Tolosan, France).

First the adapter sequences from the reads were removed using bbduk from bbmap v38.57 (<https://sourceforge.net/projects/bbmap/>). The metagenomic snakemake workflow implemented in anvi’o v62 was used to perform the main following steps : illumina-utils v1.4 (sequence quality filtering)3, assemblage of individual metagenomes with Megahit v1.2.94, open reading frames identification with Prodigal v2.6.35 , single-copy core genes identification using HMMER V3.2.16, gene functions annotation using the NCBI Clusters of Orthologous Groups (COG)7 and the KOfam HMM database of KEGG orthologs8,9, metagenomic short reads to contigs recruitment thanks to Bowtie2 v2.4.210, SAM to BAM files conversion using samtools V1.711 before profiling using “anvi-profil” and combining all profiles into a single anvi’o profile using “anvi-merge”, groupment of contigs into bins with CONCOCT v1.1.012, manual bins refinement using “anvi-refine”. After that, only Metagenome-Assembled Genomes (MAGs) with a completion above 60% and a contamination under 10% were kept and then renamed (prefix “M” for midgut tube samples and “F” for foregut samples, name of the site, MAG abbreviation, a number). MAGs collection was dereplicated and only a unique representative genome for MAGs showing more than 99% average nucleotide identity (ANI) with a coverage threshold of 50% using dRep v2.3.213 were selected. To finish, a final mapping was performed on dereplicated MAGs to calculate their detection and mean coverage.

*2Eren, A. M., Esen, C., Quince, C., Vineis, J. H., Morrison, H. G., Sogin, M. L. , et al. 2015. « Anvi’o: an advanced analysis and visualization platform for ’omics data. » PeerJ. 3:e1319.*

*3 Eren, A. M., Vineis, J. H., Morrison, H. G., Sogin, M. L. 2013. « A filtering method to generate high quality short reads using illumina paired-end technology. » PLoS One. 8:e66643.*

*4 Li, D., Liu, C-M., Luo, R., Sadakane, K., Lam, T-W. 2015. « MEGAHIT: an ultra-fast singlenode solution for large and complex metagenomics assembly via succinct de Bruijn graph. » Bioinformatics. 31:1674–6.*

*5 Hyatt, D., Chen, G. L., LoCascio, P. F., Land, M. L., Larimer, F. W., Hauser, L. J. 2010. « Prodigal: prokaryotic gene recognition and translation initiation site identification. » BMC Bioinformatics.11:119. https://doi.org/10.1186/1471-​2105-​11-​119.*

*6 Eddy, S. R. 2011. « Accelerated profile HMM searches. » PLoS Comput Biol. 7:e1002195.*

*7 Galperin, M. Y., Wolf, Y. I., Makarova, K. S., Vera Alvarez, R., Landsman, D., Koonin, E. V. 2021. « COG database update: focus on microbial diversity, model organisms, and widespread pathogens. » Nucleic Acids Res. 49:D274–81.*

*8 Aramaki, T., Blanc-Mathieu, R., Endo, H., Ohkubo, K., Kanehisa, M., Goto, S., et al. 2020. « KofamKOALA: KEGG Ortholog assignment based on profile HMM and adaptive score threshold. » Bioinformatics. 36:2251–2.*

*9 Kanehisa, M., Goto, S. 2000. « KEGG: Kyoto encyclopedia of genes and genomes. » Nucleic Acids Res. 28:27–30.*

*10 Langmead B, Salzberg SL. Fast gapped-read alignment with bowtie 2. Nat Methods. 2012;9:357–9.*

*11 Li, H., Handsaker, B., Wysoker, A., Fennell, T., Ruan, J., Homer, N., et al. 2009. « The sequence alignment/map format and SAMtools. » Bioinformatics. 25:2078–9.*

*12 Alneberg, J., Bjarnason, B. S., de Bruijn, I., Schirmer, M., Quick, J., Ijaz, U. Z., et al. 2014. « Binning metagenomic contigs by coverage and composition. » Nat Methods. 11:1144–6.*

*13 Olm, M. R., Brown, C. T., Brooks, B., Banfield, J. F. 2017. « dRep: a tool for fast and accurate genomic comparisons that enables improved genome recovery from metagenomes through de-replication. » ISME J. 11:2864–8.*

## Supplementary Material 5

### Configuration file for the process’s option used in SAMBA for juvenile and *Rimicaris exoculata* adult midgut tube samples from BICOSE2 cruise (first metabarcoding analysis)

/*

* -------------------------------------------------

* Nextflow test config file for processes options

* -------------------------------------------------

* Defines general paths for input files and

* parameters for samba processes

*/

params {

/* --------------------

* General parameters

* --------------------

*/

// Analyzed project name

projectName = "Rimicaris_adult_juv _TD"

// Output directory to publish workflow results

outdir = "${baseDir}/results/${projectName}"

// Input parameters

// sample file must be in XLS format

excel_sample_file = "${baseDir}/q2_manifest_metadata_2025_adult_juv_TD.xls"

// Type of data

data_type = "illumina"

singleEnd = false

raw_read_length = "250"

/* -----------------------------

* Data integrity process

* -----------------------------

*/

data_integrity_enable = true

/* -----------------------------

* Cutadapt process parameters

* -----------------------------

* Optional process to remove

* primers from raw reads

*/

//Activation

cutadapt_enable = true

//Set your forward and reverse primers

primerF = "CCTACGGGNGGCWGCAG"

primerR = "GACTACHVGGGTATCTAATCC"

//Error rate (default = 0.1)

errorRate = "0.1"

/* -----------------------------

* FIGARO process parameters

* -----------------------------

* Optional and only for paired-end

* data

*/

//Activation (ONLY FOR PAIRED-END DATA)

figaro_enable = true

//Set the path to your directory containing raw data FASTQ

raw_data_dir = "${baseDir}/fasta"

//Set the size of expected amplicons

amplicon_length = "420"

/* --------------------------------------------------------

* DADA2 process parameters

* --------------------------------------------------------

* Infers exact amplicon sequence variants (ASVs)

* If you have enable FIGARO, the optimal parameters for

* DADA2 will be automatically used otherwise you can

* configure set quality trimming parameters to fit to

* your data

*/

//Remove the first n bases of each reads ( default = 0 -> no removal)

FtrimLeft = "0"

RtrimLeft = "0"

//Length at which to trim reads. Remove bases after this length ( default = 0 -> no trimming)

FtruncLen = "0"

RtruncLen = "0"

//Minium allowed base quality (default = 2)

truncQ = "2"

//Max error rate allowed for reads (default = 2)

FmaxEE = "2"

RmaxEE = "2"

//The number of reads to use when training the error model.

//Smaller numbers will result in a shorter run time but a less reliable error model.

n_read_learn = "1000000"

//Method used to pool samples for denoising. Choices: 'independent' (default) or 'pseudo'

//see DADA2 documentation for more explanation

pooling_method = "independent"

//Method used to identify and remove chimeras. Choices: 'consensus' (default), 'none' or 'pooled'

//see DADA2 documentation for more explanation

chimeras_method = "consensus"

/* -------------------------------------

* swarm ASV clustering

* -------------------------------------

*/

//Activation

swarm_clustering_enable = false

/* -------------------------------------

* dbOTU3 process parameters

* -------------------------------------

* Optional process to cluster

* ASV based on phylogeny, distribution

* and abundance criterions

*/

//Activation

dbotu3_enable = true

/* -------------------------------------

* ASV taxonomic assignment using

* QIIME2 RDP-like program

* -------------------------------------

* pre-formatted databases can be download here:

* https://data-dataref.ifremer.fr/bioinfo/ifremer/sebimer/sequence-set/SAMBA/v4/databases/

*/

// Name of the taxonomic database. Can be: silva (7 tax ranks), pr2-4 (8 ranks), pr2-5 (9 ranks) or MARE-MAGE (9 ranks)

db_name = "silva"

//Path to a trained Naive Bayes QIIME 2 classifier

database = "/home/ref-bioinfo/ifremer/sebimer/tool-specific-banks/qiime2/SILVA/v138.2/target_region/16S_V3-V4_341F-785R/SILVA_v138.2_NR99_16S_V3-V4_341F-785R.qza"

/* -------------------------------------

* Filter ASV table and ASV sequences

* based on the taxonomic assignment

* -------------------------------------

*/

//Activation

filter_table_by_tax_enable = false

//Type of filtering : 'exclude' if you want to exclude some taxa or 'include' if you want to keep only some taxa

filtering_type = "exclude"

//List of taxa you want to fitler (comma separated list).

tax_to_filter = "Archaea,Chloroplast,Eukaryota,Mitochondria"

/* ---------------------------------------

* Filter ASV table and ASV sequences

* based on the data

* ---------------------------------------

* sample ID and/or frequency/contingency

*/

//Global activation

filter_table_by_data_enable = false

//Filtering based on SampleID

//Activation

filter_by_id = false

//list of samples to remove (comma separated list)

list_sample_to_remove = "none"

//Filtering based on frequency/contingency

//Activation

filter_by_frequency = false

//Minimum desired total sequence count within each sample

min_frequency_sample = "1"

//Minimum desired abundance for each ASV

min_frequency_asv = "1"

//Minimum number of samples in which an ASV must be found to be kept

contingency_asv = "1"

//Filtering based on ASV length

//Activation

filter_by_length = false

//Minimum length of ASVs

asv_min_length = "400"

//Maximum length of ASVs

asv_max_length = "460"

/* -------------------------------------

* Decontamination step using

* microDecon R package

* -------------------------------------

* Remove contaminant ASVs based on

* their frequency both in control

* sample(s) and biological samples

*/

//Activation

filter_contaminants_enable = true

//List of control samples e.g.: "control1" or "control1,control2"

list_control_samples = "Rem-T2n1,Rem-T2n2,Rem-T2n3,Rem-T2n4,Rem-T2n5,Rem-T2,Rem-Tn4,REM55-temoin-ext1,REM56-temoin-ext2,REM57-temoin-ext3,REM58-temoin-PCR"

/* -------------------------------------

* Differential abundance analysis

* using ANCOM-BC

* -------------------------------------

*/

//Activation

ancombc_enable = true

//Set to true ff you want to use custom categorical group as reference to identify differential abundances

//otherwise the first value of the variable(s) tested will be taken as a reference

use_custom_reference = false

//Custom sample group value to use as reference. Syntax: "column_name::column_value"

reference_level = ""

//Variable to analyse for differential abundance

//can be one variable: "column_name"

//can be several variables to be analyse separately: "column_name_1,column_name2,..."

//can be several variables to be analyse in interaction: "column_name_1+column_name2"

ancombc_formula = "site,stage,species"

//Statistical parameters

//method for adjusted pvalue

p_adj_method = "holm"

//number of iterations for the E-M algorithm

max_iter = "100"

//significant pvalue threshold

alpha = "0.05"

/* -------------------------------------

* Functional predictions using

* PICRUSt2

* -------------------------------------

* Only for 16S analysis

*/

//Activation

picrust2_enable = false

//Gene families to predict. Can be: COG, EC, KO, PFAM, TIGRFAM

traits_db = "EC,KO"

//Max nsti value accepted. By default: NSTI cut-off of 2 should eliminate junk sequences

nsti = "0.2"

//HSP method of your choice. By default: 'mp' the most accurate prediction method. Faster method: 'pic'

hsp_method = "mp"

//Minimum number of reads across all samples for each input ASV

min_reads = "1"

//Minimum number of samples that an ASV needs to be identfied within

min_samples = "1"

//Variables of interest (comma separated list)

picrust2_tested_variable = "site,stage,species"

//Pathway description file

secondary_level_mapfile = "${baseDir}/containers/picrust2-2.5.1/metacyc_pathways_info_prokaryotes_sec_level.tsv"

/* -----------------------------

* Statistical analyses

* -----------------------------

*/

//Normalisation method(s) used

//can be "rarefaction", "css", "deseq2" or multiple methods: "rarefaction,css,deseq2"

normalisation_type = "rarefaction,css,deseq2"

//Variable(s) to test for alpha and beta diversity

//can be one variable: "varname"

//can be several variables to be analyse separately: "varname1,varname2,..."

stat_var = "species,site,stage"

//Number of taxa to represent

taxa_nb = "10"

}

## Supplementary Material 6

### Configuration file for the process’s option used in SAMBA for *Rimicaris exoculata* and *Rimicaris chacei* adult midgut tube samples from BICOSE2014 cruise (second metabarcoding analysis)

### .

/*

* -------------------------------------------------

* Nextflow test config file for processes options

* -------------------------------------------------

* Defines general paths for input files and

* parameters for samba processes

*/

params {

/* --------------------

* General parameters

* --------------------

*/

// Analyzed project name

projectName = "adult_ TD_REX_RCHA_TAG_SP_BICOSE2014"

// Output directory to publish workflow results

outdir = "${baseDir}/results/${projectName}"

// Input parameters

// sample file must be in XLS format

excel_sample_file = "${baseDir}/q2_manifest_metadata_ _TD_REX_RCHA_TAG_SP_BICOSE2014.xls"

// Type of data

data_type = "illumina"

singleEnd = false

raw_read_length = "300"

/* -----------------------------

* Data integrity process

* -----------------------------

*/

data_integrity_enable = true

/* -----------------------------

* Cutadapt process parameters

* -----------------------------

* Optional process to remove

* primers from raw reads

*/

//Activation

cutadapt_enable = true

//Set your forward and reverse primers

primerF = "CCTACGGGAGGCAGCAG"

primerR = "CCGTCWATTCMTTTRAGT"

//Error rate (default = 0.1)

errorRate = "0.1"

/* -----------------------------

* FIGARO process parameters

* -----------------------------

* Optional and only for paired-end

* data

*/

//Activation (ONLY FOR PAIRED-END DATA)

figaro_enable = true

//Set the path to your directory containing raw data FASTQ

raw_data_dir = "${baseDir}/dna-sequence-raw/"

//Set the size of expected amplicons

amplicon_length = "530"

/* --------------------------------------------------------

* DADA2 process parameters

* --------------------------------------------------------

* Infers exact amplicon sequence variants (ASVs)

* If you have enable FIGARO, the optimal parameters for

* DADA2 will be automatically used otherwise you can

* configure set quality trimming parameters to fit to

* your data

*/

//Remove the first n bases of each reads ( default = 0 -> no removal)

FtrimLeft = "0"

RtrimLeft = "0"

//Length at which to trim reads. Remove bases after this length ( default = 0 -> no trimming)

FtruncLen = "0"

RtruncLen = "0"

//Minium allowed base quality (default = 2)

truncQ = "2"

//Max error rate allowed for reads (default = 2)

FmaxEE = "2"

RmaxEE = "2"

//The number of reads to use when training the error model.

//Smaller numbers will result in a shorter run time but a less reliable error model.

n_read_learn = "1000000"

//Method used to pool samples for denoising. Choices: 'independent' (default) or 'pseudo'

//see DADA2 documentation for more explanation

pooling_method = "independent"

//Method used to identify and remove chimeras. Choices: 'consensus' (default), 'none' or 'pooled'

//see DADA2 documentation for more explanation

chimeras_method = "consensus"

/* -------------------------------------

* swarm ASV clustering

* -------------------------------------

*/

//Activation

swarm_clustering_enable = false

/* -------------------------------------

* dbOTU3 process parameters

* -------------------------------------

* Optional process to cluster

* ASV based on phylogeny, distribution

* and abundance criterions

*/

//Activation

dbotu3_enable = true

/* -------------------------------------

* ASV taxonomic assignment using

* QIIME2 RDP-like program

* -------------------------------------

* pre-formatted databases can be download here:

* https://data-dataref.ifremer.fr/bioinfo/ifremer/sebimer/sequence-set/SAMBA/v4/databases/

*/

// Name of the taxonomic database. Can be: silva (7 tax ranks), pr2-4 (8 ranks), pr2-5 (9 ranks) or MARE-MAGE (9 ranks)

db_name = "silva"

//Path to a trained Naive Bayes QIIME 2 classifier

database = "/home/ref-bioinfo/ifremer/sebimer/tool-specific-banks/qiime2/SILVA/v138.2/target_region/16S-18S_V3-V5_357F-926R/SILVA_v138.2_NR99_16S-18S_V3-V5_357F-926R.qza"

/* -------------------------------------

* Filter ASV table and ASV sequences

* based on the taxonomic assignment

* -------------------------------------

*/

//Activation

filter_table_by_tax_enable = false

//Type of filtering : 'exclude' if you want to exclude some taxa or 'include' if you want to keep only some taxa

filtering_type = "exclude"

//List of taxa you want to fitler (comma separated list).

tax_to_filter = "Archaea,Chloroplast,Eukaryota,Mitochondria"

/* ---------------------------------------

* Filter ASV table and ASV sequences

* based on the data

* ---------------------------------------

* sample ID and/or frequency/contingency

*/

//Global activation

filter_table_by_data_enable = false

//Filtering based on SampleID

//Activation

filter_by_id = false

//list of samples to remove (comma separated list)

list_sample_to_remove = "none"

//Filtering based on frequency/contingency

//Activation

filter_by_frequency = false

//Minimum desired total sequence count within each sample

min_frequency_sample = "1"

//Minimum desired abundance for each ASV

min_frequency_asv = "1"

//Minimum number of samples in which an ASV must be found to be kept

contingency_asv = "1"

//Filtering based on ASV length

//Activation

filter_by_length = false

//Minimum length of ASVs

asv_min_length = "500"

//Maximum length of ASVs

asv_max_length = "600"

/* -------------------------------------

* Decontamination step using

* microDecon R package

* -------------------------------------

* Remove contaminant ASVs based on

* their frequency both in control

* sample(s) and biological samples

*/

//Activation

filter_contaminants_enable = false

//List of control samples e.g.: "control1" or "control1,control2"

list_control_samples = ""

/* -------------------------------------

* Differential abundance analysis

* using ANCOM-BC

* -------------------------------------

*/

//Activation

ancombc_enable = true

//Set to true ff you want to use custom categorical group as reference to identify differential abundances

//otherwise the first value of the variable(s) tested will be taken as a reference

use_custom_reference = false

//Custom sample group value to use as reference. Syntax: "column_name::column_value"

reference_level = ""

//Variable to analyse for differential abundance

//can be one variable: "column_name"

//can be several variables to be analyse separately: "column_name_1,column_name2,..."

//can be several variables to be analyse in interaction: "column_name_1+column_name2"

ancombc_formula = "site,species"

//Statistical parameters

//method for adjusted pvalue

p_adj_method = "holm"

//number of iterations for the E-M algorithm

max_iter = "100"

//significant pvalue threshold

alpha = "0.05"

/* -------------------------------------

* Functional predictions using

* PICRUSt2

* -------------------------------------

* Only for 16S analysis

*/

//Activation

picrust2_enable = false

//Gene families to predict. Can be: COG, EC, KO, PFAM, TIGRFAM

traits_db = "EC,KO"

//Max nsti value accepted. By default: NSTI cut-off of 2 should eliminate junk sequences

nsti = "0.2"

//HSP method of your choice. By default: 'mp' the most accurate prediction method. Faster method: 'pic'

hsp_method = "mp"

//Minimum number of reads across all samples for each input ASV

min_reads = "1"

//Minimum number of samples that an ASV needs to be identfied within

min_samples = "1"

//Variables of interest (comma separated list)

picrust2_tested_variable = "site,species"

//Pathway description file

secondary_level_mapfile = "${baseDir}/containers/picrust2-2.5.1/metacyc_pathways_info_prokaryotes_sec_level.tsv"

/* -----------------------------

* Statistical analyses

* -----------------------------

*/

//Normalisation method(s) used

//can be "rarefaction", "css", "deseq2" or multiple methods: "rarefaction,css,deseq2"

normalisation_type = "rarefaction,css,deseq2"

//Variable(s) to test for alpha and beta diversity

//can be one variable: "varname"

//can be several variables to be analyse separately: "varname1,varname2,..."

stat_var = "species,site"

//Number of taxa to represent

taxa_nb = "10"

}
